# Supplementary material for: The structural basis of the multi-step allosteric activation of Aurora B kinase
Source: eLife journal article supplement (doi:10.7554/elife.85328), 2023-05-22

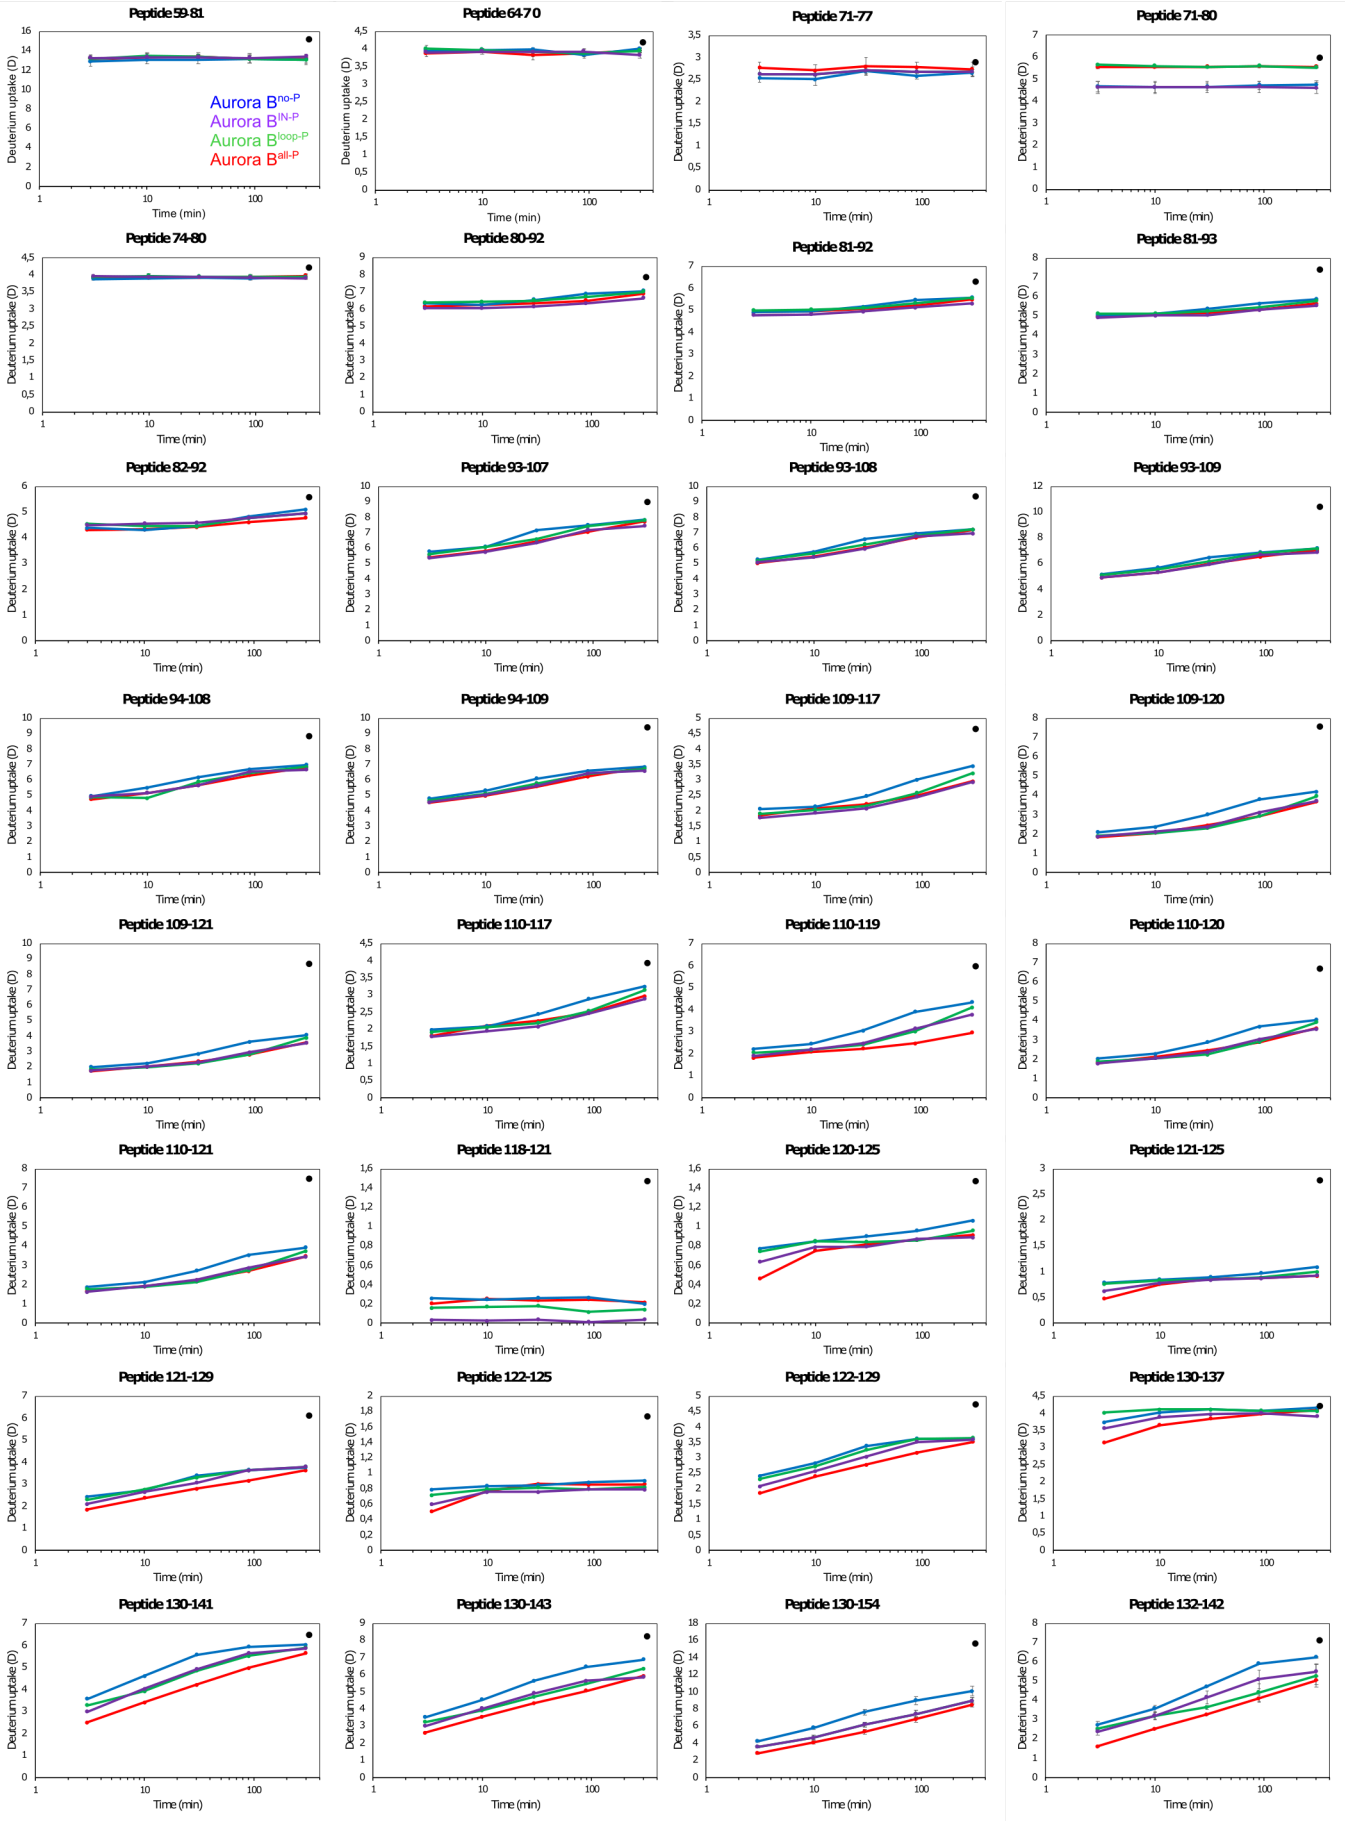

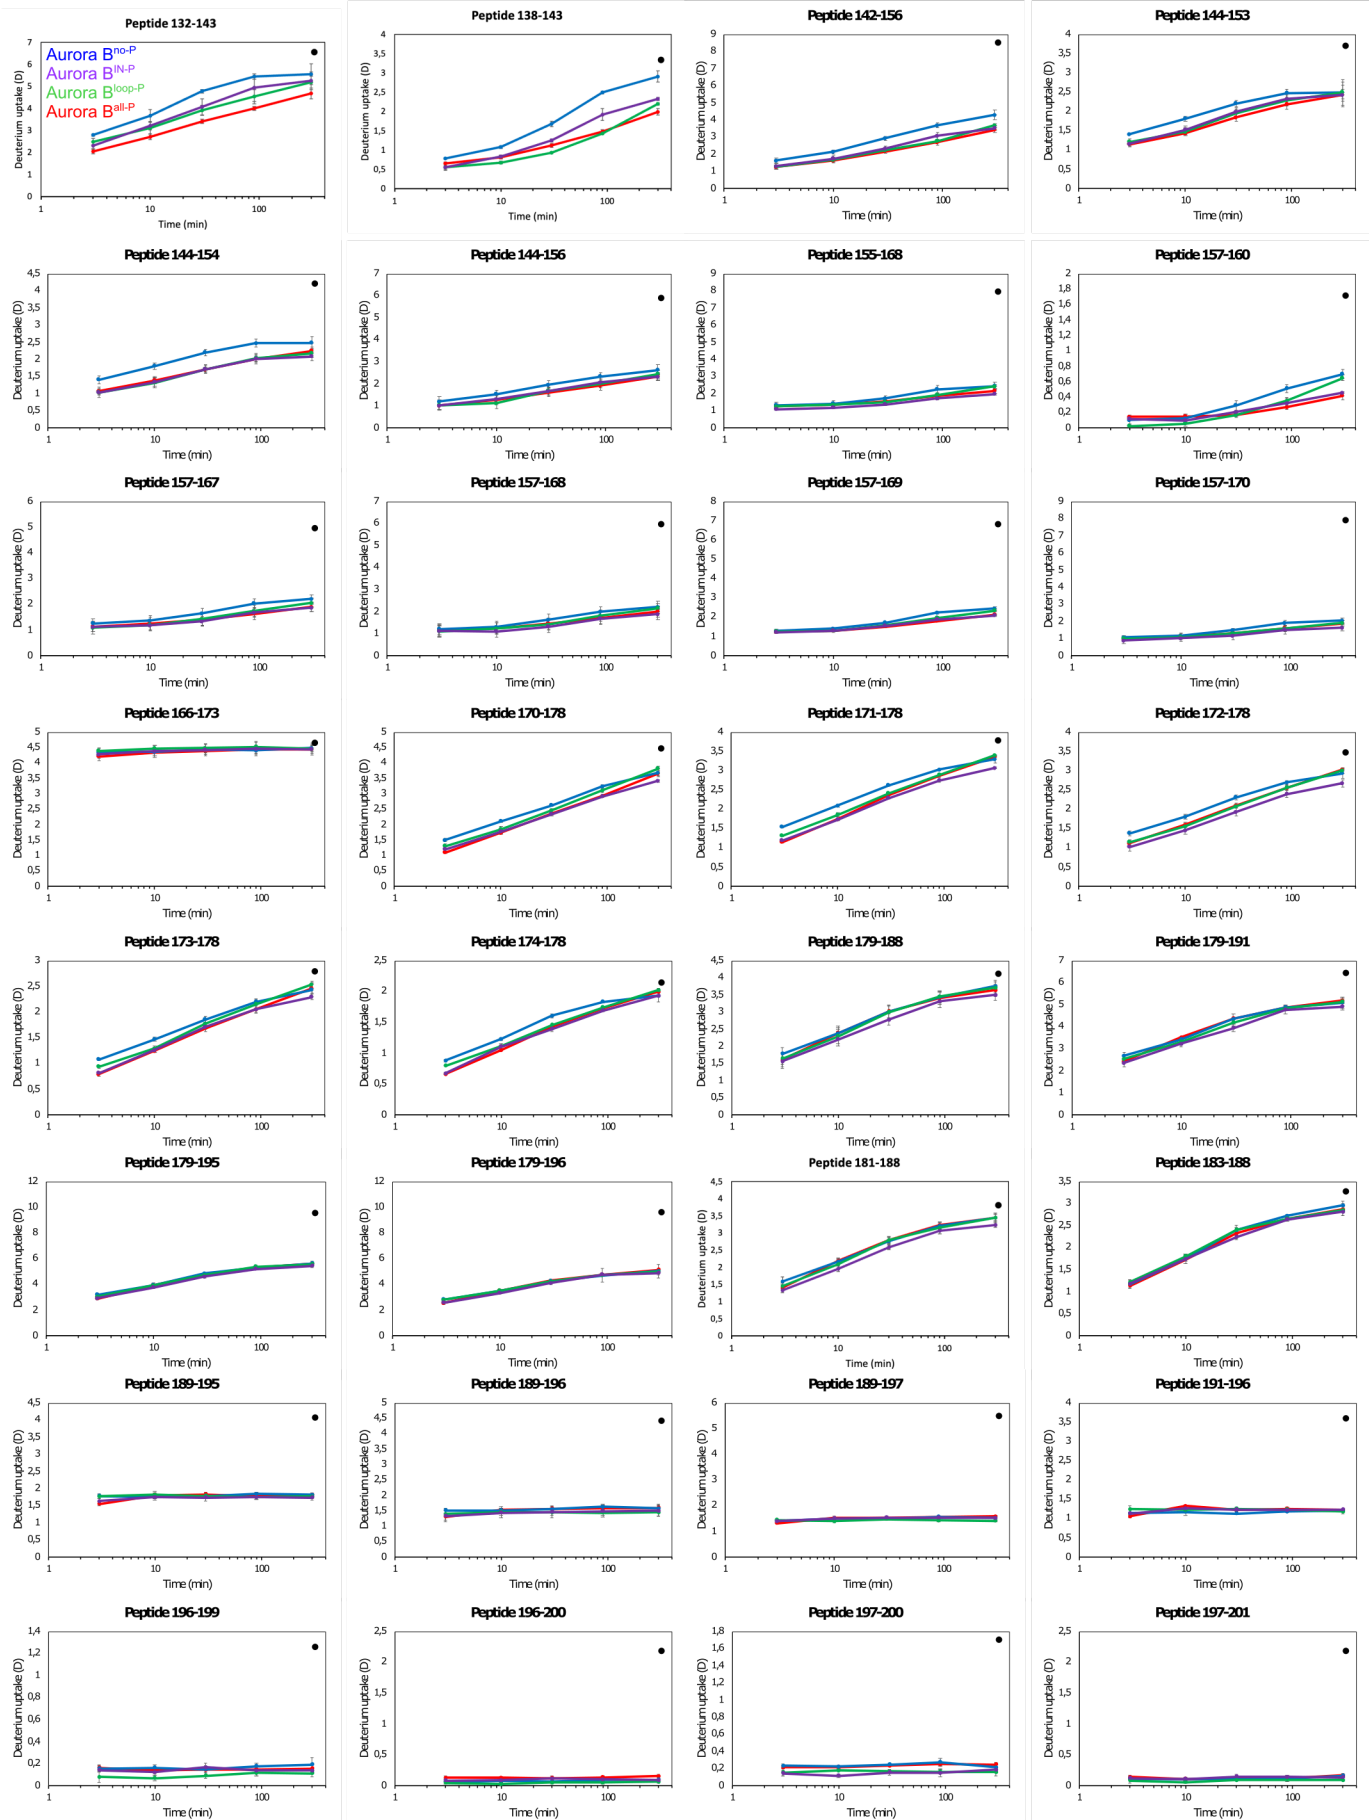



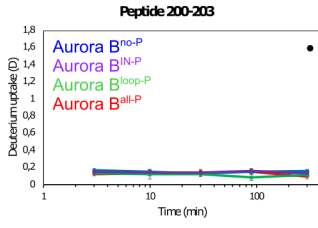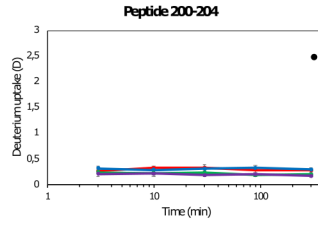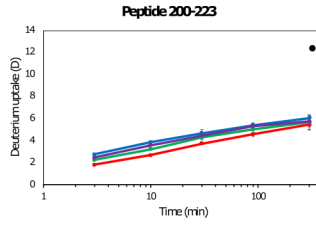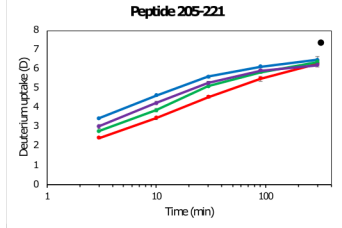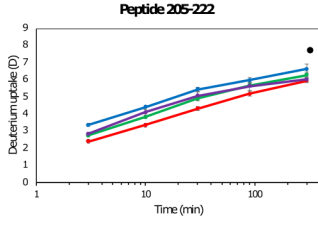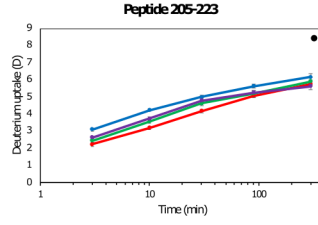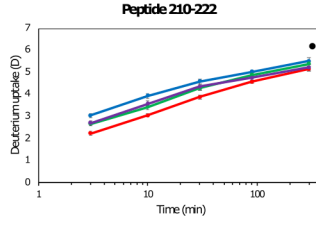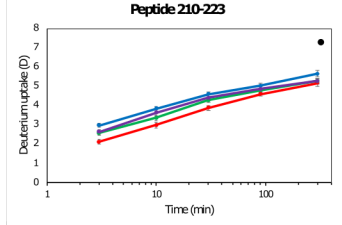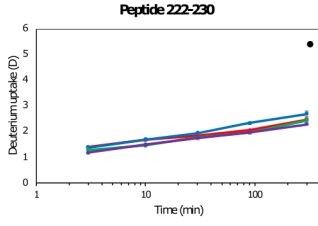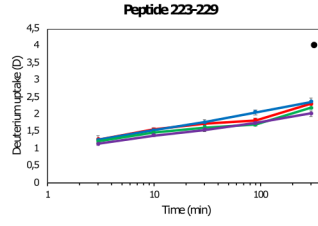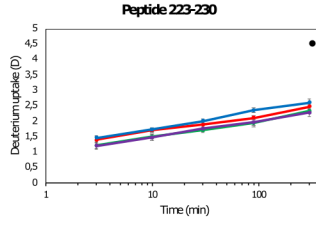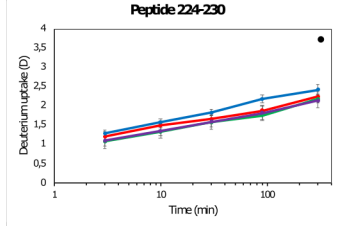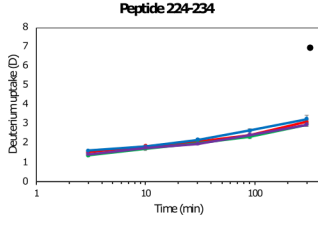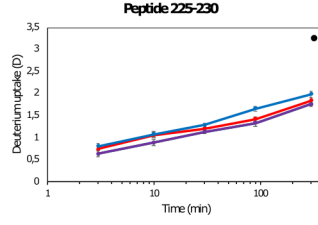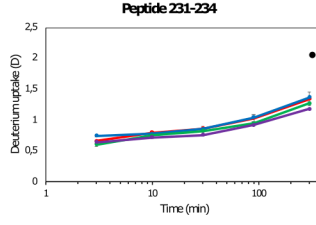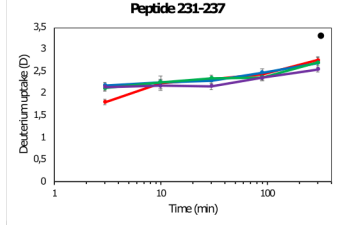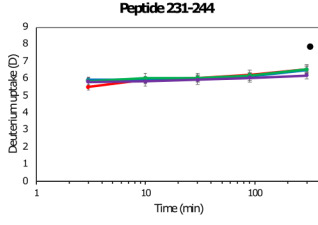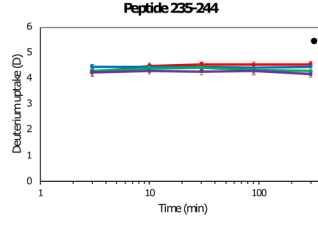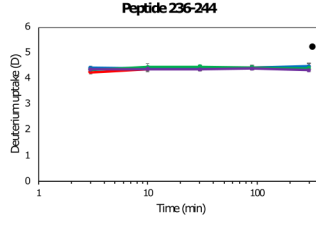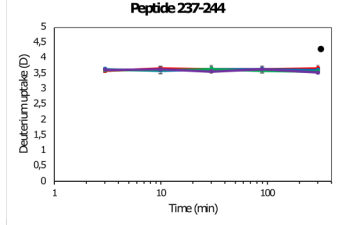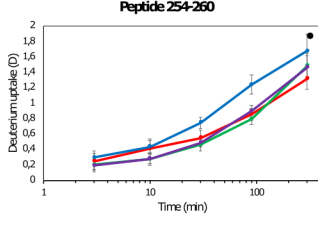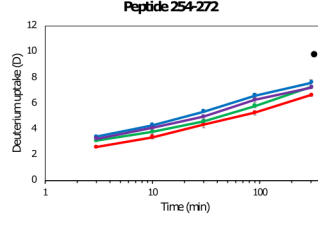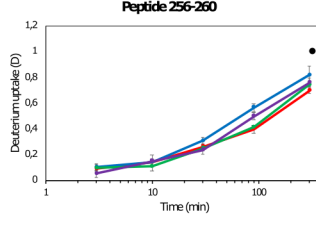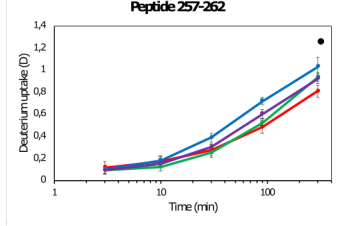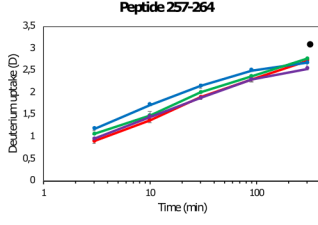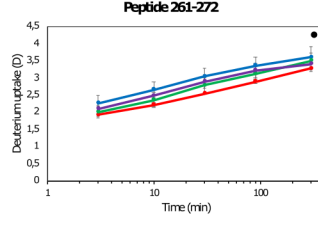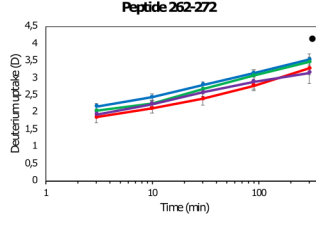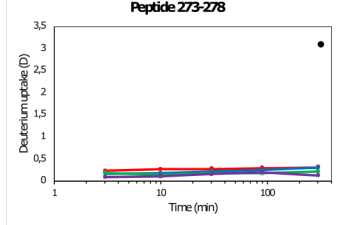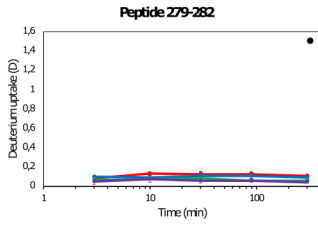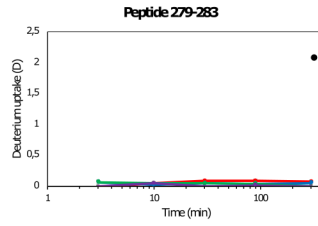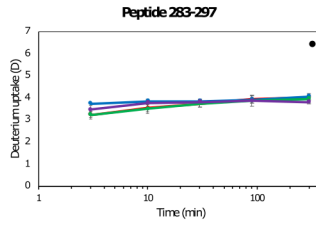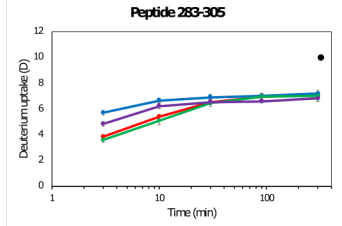

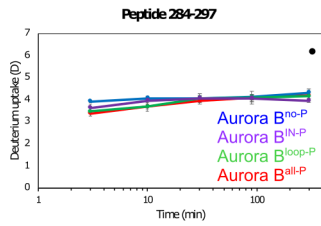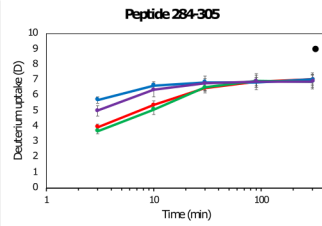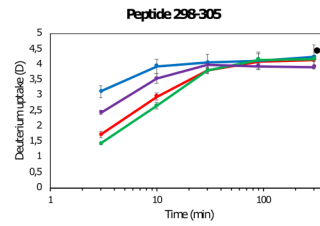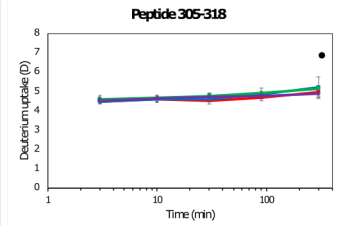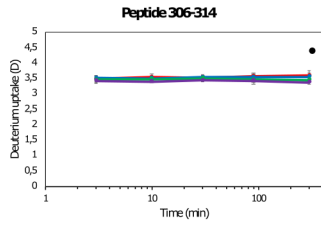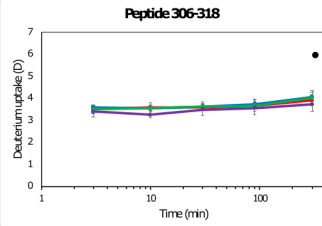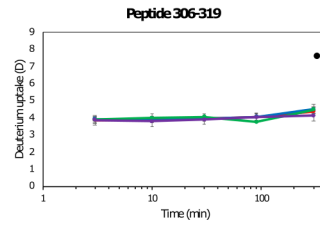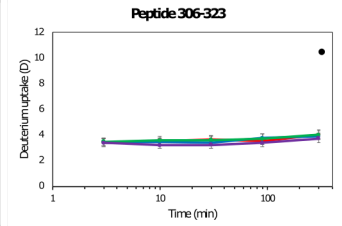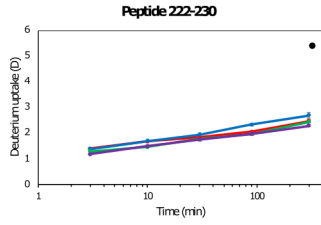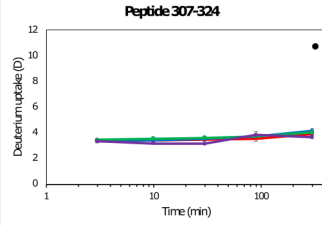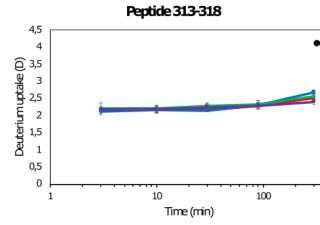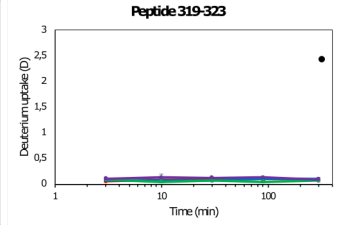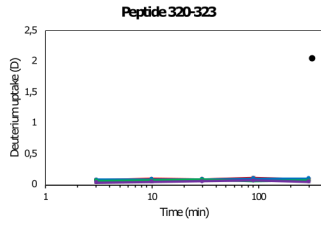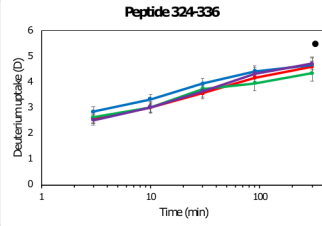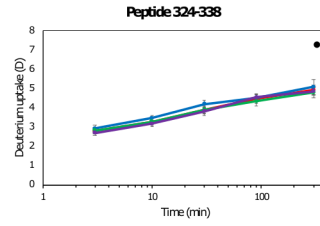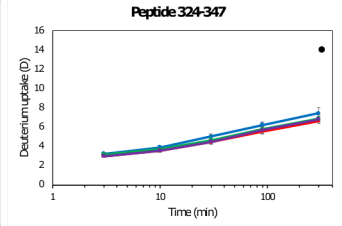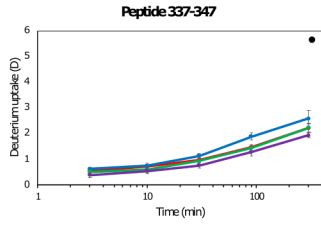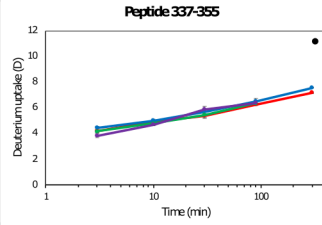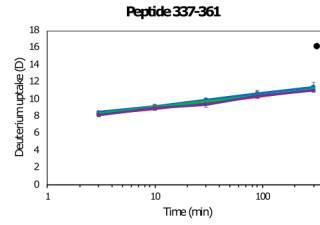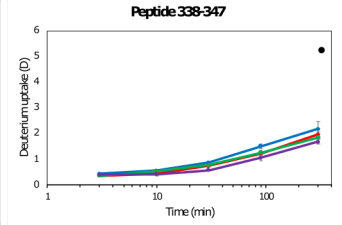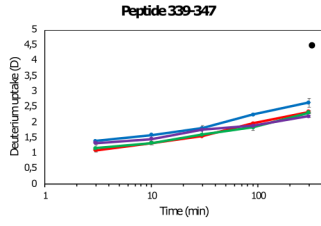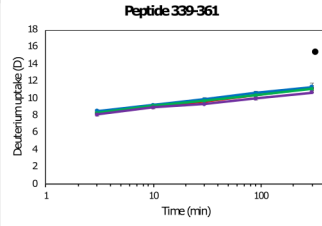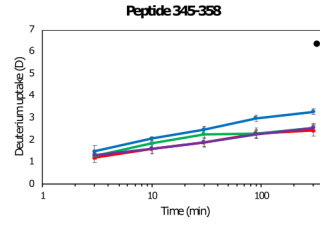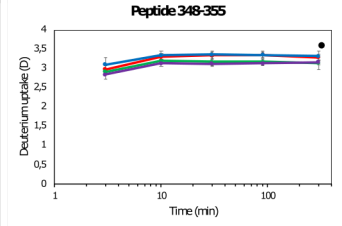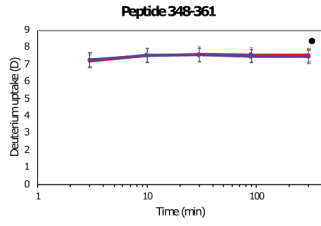

Supplement: supp5 [file elife-85328-supp5-v2.pdf]
