# Supplementary material for: The structural basis of the multi-step allosteric activation of Aurora B kinase
Source: eLife. 2023 May 25;12:e85328. doi: 10.7554/eLife.85328 (PMC10259393; doi:10.7554/eLife.85328)
Supplement: Supplementary file 1. [file elife-85328-supp1.xlsx]

## Sheet: Table S1
TABLE S1
HDX-MS summary for [Aurora B/IN-box]all-P and [Aurora B/IN-box]no-P
Data Set	all-P	no-P
HDX reaction details	20 mM HEPES, 300 mM NaCl, 2mM MgCl2, 1mM ADP pDread = 7.0, 25 °C	20 mM HEPES, 300 mM NaCl, 2mM MgCl2, ,1mM ADP pDread = 7.0, 25 °C
HDX time course (min)	3, 10, 30, 90	3, 10, 30, 90
HDX control samples
Back-exchange (mean / IQR)
# of Peptides	183	184
Sequence coverage	0.96	0.96
Average peptide length / Redundancy	10.75 / 5.5	10.75 / 5.5
Replicates (biological or technical)	3 (technical)	3 (technical)
Repeatability	0.0752 (average standard deviation)	0.0841 (average standard deviation)
Significant differences in HDX (delta HDX > X D)	0.25 D (95% CI)
