# Supplementary material for: The structural basis of the multi-step allosteric activation of Aurora B kinase
Source: eLife. 2023 May 25;12:e85328. doi: 10.7554/eLife.85328 (PMC10259393; doi:10.7554/eLife.85328)
Supplement: Supplementary file 2. [file elife-85328-supp2.xlsx]

## Sheet: Table S2.
Table S2. HDX data for [Aurora B/IN-box]all-P and [Aurora B/IN-box]no-P
Protein	Start	End	Sequence	Modification	Peptide mass (Da)	State	Exposure	Center	Center SD	Uptake	Uptake SD	RT	RT SD
Aurora B	64	70	PGRVAVS		685.399200	all-P	0.000000	685.787039	0.006185	0.000000	0.000000	5.521237	0.003523
Aurora B	64	70	PGRVAVS		685.399200	all-P	3.000000	689.706179	0.011541	3.919141	0.013093	5.508332	0.015729
Aurora B	64	70	PGRVAVS		685.399200	all-P	10.000000	689.646543	0.010889	3.859505	0.012523	5.499794	0.016442
Aurora B	64	70	PGRVAVS		685.399200	all-P	30.000002	689.598649	0.026213	3.811611	0.026933	5.516324	0.009896
Aurora B	64	70	PGRVAVS		685.399200	all-P	90.000008	689.631028	0.042799	3.843989	0.043243	5.516452	0.011432
Aurora B	64	70	PGRVAVS		685.399200	no-P	0.000000	685.787039	0.006185	0.000000	0.000000	5.521237	0.003523
Aurora B	64	70	PGRVAVS		685.399200	no-P	3.000000	689.659857	0.036528	3.872819	0.037048	5.509310	0.012256
Aurora B	64	70	PGRVAVS		685.399200	no-P	10.000000	689.699840	0.017242	3.912802	0.018318	5.505134	0.010114
Aurora B	64	70	PGRVAVS		685.399200	no-P	30.000002	689.642992	0.015394	3.855954	0.016590	5.515140	0.011863
Aurora B	64	70	PGRVAVS		685.399200	no-P	90.000008	689.668977	0.016537	3.881938	0.017656	5.525277	0.003761
Aurora B	71	77	TEMPSQN		806.334900	all-P	0.000000	806.745315	0.030108	0.000000	0.000000	4.644519	0.004704
Aurora B	71	77	TEMPSQN		806.334900	all-P	3.000000	809.717556	0.340135	2.972241	0.341465	4.637385	0.006039
Aurora B	71	77	TEMPSQN		806.334900	all-P	10.000000	809.712523	0.322791	2.967209	0.324192	4.626483	0.013371
Aurora B	71	77	TEMPSQN		806.334900	all-P	30.000002	809.695317	0.347721	2.950003	0.349022	4.629961	0.015646
Aurora B	71	77	TEMPSQN		806.334900	all-P	90.000008	809.717422	0.303342	2.972107	0.304832	4.621603	0.031143
Aurora B	71	77	TEMPSQN		806.334900	no-P	0.000000	806.745315	0.030108	0.000000	0.000000	4.644519	0.004704
Aurora B	71	77	TEMPSQN		806.334900	no-P	3.000000	809.709512	0.347842	2.964197	0.349142	4.636486	0.007092
Aurora B	71	77	TEMPSQN		806.334900	no-P	10.000000	809.696337	0.362229	2.951022	0.363478	4.630944	0.004917
Aurora B	71	77	TEMPSQN		806.334900	no-P	30.000002	809.701171	0.357075	2.955857	0.358342	4.619090	0.029364
Aurora B	71	77	TEMPSQN		806.334900	no-P	90.000008	809.789731	0.360062	3.044416	0.361319	4.631392	0.017940
Aurora B	71	80	TEMPSQNTAL		1091.503700	all-P	0.000000	1092.656696	0.274662	0.000000	0.000000	6.900795	0.004886
Aurora B	71	80	TEMPSQNTAL		1091.503700	all-P	3.000000	1097.216095	0.193625	4.559398	0.336050	6.889812	0.014846
Aurora B	71	80	TEMPSQNTAL		1091.503700	all-P	10.000000	1097.268067	0.154680	4.611371	0.315222	6.901068	0.000801
Aurora B	71	80	TEMPSQNTAL		1091.503700	all-P	30.000002	1097.349989	0.119978	4.693293	0.299723	6.903481	0.016035
Aurora B	71	80	TEMPSQNTAL		1091.503700	all-P	90.000008	1097.328863	0.126220	4.672167	0.302276	6.914953	0.022855
Aurora B	71	80	TEMPSQNTAL		1091.503700	no-P	0.000000	1092.656696	0.274662	0.000000	0.000000	6.900795	0.004886
Aurora B	71	80	TEMPSQNTAL		1091.503700	no-P	3.000000	1097.146472	0.209223	4.489775	0.345273	6.892628	0.008098
Aurora B	71	80	TEMPSQNTAL		1091.503700	no-P	10.000000	1097.249152	0.180988	4.592455	0.328931	6.891064	0.017696
Aurora B	71	80	TEMPSQNTAL		1091.503700	no-P	30.000002	1097.270751	0.179914	4.614055	0.328342	6.905362	0.010400
Aurora B	71	80	TEMPSQNTAL		1091.503700	no-P	90.000008	1097.290377	0.182374	4.633681	0.329696	6.908577	0.003167
Aurora B	74	80	PSQNTAL		730.373000	all-P	0.000000	730.805650	0.047669	0.000000	0.000000	5.852414	0.004318
Aurora B	74	80	PSQNTAL		730.373000	all-P	3.000000	734.503112	0.521664	3.697461	0.523838	5.835648	0.008777
Aurora B	74	80	PSQNTAL		730.373000	all-P	10.000000	734.506494	0.491897	3.700843	0.494202	5.827904	0.010480
Aurora B	74	80	PSQNTAL		730.373000	all-P	30.000002	734.538687	0.502181	3.733037	0.504438	5.837459	0.012579
Aurora B	74	80	PSQNTAL		730.373000	all-P	90.000008	734.511456	0.507072	3.705805	0.509308	5.845540	0.012486
Aurora B	74	80	PSQNTAL		730.373000	no-P	0.000000	730.805650	0.047669	0.000000	0.000000	5.852414	0.004318
Aurora B	74	80	PSQNTAL		730.373000	no-P	3.000000	734.460670	0.498744	3.655020	0.501017	5.842076	0.011535
Aurora B	74	80	PSQNTAL		730.373000	no-P	10.000000	734.491355	0.475283	3.685705	0.477668	5.834956	0.014333
Aurora B	74	80	PSQNTAL		730.373000	no-P	30.000002	734.505818	0.493063	3.700168	0.495362	5.840075	0.012759
Aurora B	74	80	PSQNTAL		730.373000	no-P	90.000008	734.532031	0.491550	3.726381	0.493856	5.844546	0.003979
Aurora B	80	92	LAEMPKRKFTIDD		1563.819900	all-P	0.000000	1564.834457	0.083228	0.000000	0.000000	7.098382	0.005469
Aurora B	80	92	LAEMPKRKFTIDD		1563.819900	all-P	3.000000	1571.077767	0.304693	6.243310	0.315855	7.089941	0.020745
Aurora B	80	92	LAEMPKRKFTIDD		1563.819900	all-P	10.000000	1571.238979	0.078093	6.404522	0.114129	7.079659	0.021275
Aurora B	80	92	LAEMPKRKFTIDD		1563.819900	all-P	30.000002	1571.364601	0.264643	6.530144	0.277422	7.103860	0.014066
Aurora B	80	92	LAEMPKRKFTIDD		1563.819900	all-P	90.000008	1571.440546	0.099255	6.606088	0.129532	7.111443	0.024551
Aurora B	80	92	LAEMPKRKFTIDD		1563.819900	no-P	0.000000	1564.834457	0.083228	0.000000	0.000000	7.098382	0.005469
Aurora B	80	92	LAEMPKRKFTIDD		1563.819900	no-P	3.000000	1571.084989	0.139725	6.250532	0.162635	7.091958	0.014748
Aurora B	80	92	LAEMPKRKFTIDD		1563.819900	no-P	10.000000	1571.261011	0.266610	6.426554	0.279299	7.080813	0.017803
Aurora B	80	92	LAEMPKRKFTIDD		1563.819900	no-P	30.000002	1571.313537	0.090582	6.479079	0.123012	7.097351	0.020058
Aurora B	80	92	LAEMPKRKFTIDD		1563.819900	no-P	90.000008	1571.593472	0.133958	6.759015	0.157708	7.108911	0.010425
Aurora B	81	92	AEMPKRKFTIDD	Oxidation M (3)	1466.730800	all-P	0.000000	1467.996998	0.212161	0.000000	0.000000	6.391126	0.007630
Aurora B	81	92	AEMPKRKFTIDD	Oxidation M (3)	1466.730800	all-P	3.000000	1472.929781	0.149800	4.932783	0.259715	6.393945	0.020680
Aurora B	81	92	AEMPKRKFTIDD	Oxidation M (3)	1466.730800	all-P	10.000000	1473.134311	0.098119	5.137313	0.233751	6.382572	0.020045
Aurora B	81	92	AEMPKRKFTIDD	Oxidation M (3)	1466.730800	all-P	30.000002	1473.186634	0.091490	5.189636	0.231047	6.409585	0.012074
Aurora B	81	92	AEMPKRKFTIDD	Oxidation M (3)	1466.730800	all-P	90.000008	1473.235515	0.102370	5.238517	0.235567	6.417306	0.005538
Aurora B	81	92	AEMPKRKFTIDD	Oxidation M (3)	1466.730800	no-P	0.000000	1467.996998	0.212161	0.000000	0.000000	6.391126	0.007630
Aurora B	81	92	AEMPKRKFTIDD	Oxidation M (3)	1466.730800	no-P	3.000000	1473.035711	0.132283	5.038713	0.250022	6.394360	0.020239
Aurora B	81	92	AEMPKRKFTIDD	Oxidation M (3)	1466.730800	no-P	10.000000	1473.087955	0.110212	5.090956	0.239079	6.389592	0.014430
Aurora B	81	92	AEMPKRKFTIDD	Oxidation M (3)	1466.730800	no-P	30.000002	1473.229702	0.075748	5.232704	0.225278	6.400136	0.012345
Aurora B	81	92	AEMPKRKFTIDD	Oxidation M (3)	1466.730800	no-P	90.000008	1473.396259	0.092257	5.399261	0.231352	6.417672	0.005491
Aurora B	81	93	AEMPKRKFTIDDF		1597.804300	all-P	0.000000	1599.141916	0.167844	0.000000	0.000000	8.573345	0.005072
Aurora B	81	93	AEMPKRKFTIDDF		1597.804300	all-P	3.000000	1604.022934	0.133365	4.881019	0.214378	8.576846	0.021801
Aurora B	81	93	AEMPKRKFTIDDF		1597.804300	all-P	10.000000	1604.216881	0.150926	5.074965	0.225722	8.565029	0.018072
Aurora B	81	93	AEMPKRKFTIDDF		1597.804300	all-P	30.000002	1604.362974	0.094732	5.221058	0.192733	8.594273	0.014501
Aurora B	81	93	AEMPKRKFTIDDF		1597.804300	all-P	90.000008	1604.431312	0.111111	5.289396	0.201289	8.602297	0.018270
Aurora B	81	93	AEMPKRKFTIDDF		1597.804300	no-P	0.000000	1599.141916	0.167844	0.000000	0.000000	8.573345	0.005072
Aurora B	81	93	AEMPKRKFTIDDF		1597.804300	no-P	3.000000	1604.191164	0.152715	5.049248	0.226922	8.585234	0.018168
Aurora B	81	93	AEMPKRKFTIDDF		1597.804300	no-P	10.000000	1604.276966	0.119416	5.135051	0.205990	8.571156	0.019927
Aurora B	81	93	AEMPKRKFTIDDF		1597.804300	no-P	30.000002	1604.475911	0.115159	5.333995	0.203552	8.589006	0.022519
Aurora B	81	93	AEMPKRKFTIDDF		1597.804300	no-P	90.000008	1604.684348	0.127991	5.542432	0.211077	8.593902	0.011273
Aurora B	82	92	EMPKRKFTIDD		1379.698800	all-P	0.000000	1380.648689	0.059047	0.000000	0.000000	6.718886	0.005963
Aurora B	82	92	EMPKRKFTIDD		1379.698800	all-P	3.000000	1385.224630	0.104791	4.575941	0.120282	6.704208	0.021549
Aurora B	82	92	EMPKRKFTIDD		1379.698800	all-P	10.000000	1385.372157	0.234061	4.723468	0.241394	6.694991	0.017629
Aurora B	82	92	EMPKRKFTIDD		1379.698800	all-P	30.000002	1385.398147	0.138179	4.749459	0.150266	6.717379	0.017666
Aurora B	82	92	EMPKRKFTIDD		1379.698800	all-P	90.000008	1385.396199	0.105610	4.747510	0.120996	6.722801	0.020711
Aurora B	82	92	EMPKRKFTIDD		1379.698800	no-P	0.000000	1380.648689	0.059047	0.000000	0.000000	6.718886	0.005963
Aurora B	82	92	EMPKRKFTIDD		1379.698800	no-P	3.000000	1385.303403	0.121779	4.654714	0.135339	6.710684	0.014071
Aurora B	82	92	EMPKRKFTIDD		1379.698800	no-P	10.000000	1385.465397	0.117647	4.816708	0.131633	6.704269	0.018356
Aurora B	82	92	EMPKRKFTIDD		1379.698800	no-P	30.000002	1385.445291	0.144990	4.796602	0.156553	6.720320	0.016871
Aurora B	82	92	EMPKRKFTIDD		1379.698800	no-P	90.000008	1385.605120	0.160476	4.956431	0.170995	6.732968	0.007248
Aurora B	83	92	MPKRKFTIDD		1250.656200	all-P	0.000000	1251.609721	0.080202	0.000000	0.000000	6.721823	0.006969
Aurora B	83	92	MPKRKFTIDD		1250.656200	all-P	3.000000	1255.225514	0.077189	3.615793	0.111313	6.710805	0.021399
Aurora B	83	92	MPKRKFTIDD		1250.656200	all-P	10.000000	1255.181452	0.253104	3.571730	0.265507	6.703028	0.019444
Aurora B	83	92	MPKRKFTIDD		1250.656200	all-P	30.000002	1255.265410	0.138064	3.655688	0.159669	6.727176	0.015713
Aurora B	83	92	MPKRKFTIDD		1250.656200	all-P	90.000008	1255.269936	0.190609	3.660215	0.206795	6.730076	0.018435
Aurora B	83	92	MPKRKFTIDD		1250.656200	no-P	0.000000	1251.609721	0.080202	0.000000	0.000000	6.721823	0.006969
Aurora B	83	92	MPKRKFTIDD		1250.656200	no-P	3.000000	1255.290418	0.079015	3.680697	0.112587	6.716203	0.014772
Aurora B	83	92	MPKRKFTIDD		1250.656200	no-P	10.000000	1255.394612	0.179702	3.784891	0.196788	6.706923	0.018334
Aurora B	83	92	MPKRKFTIDD		1250.656200	no-P	30.000002	1255.275039	0.213562	3.665318	0.228125	6.732108	0.019850
Aurora B	83	92	MPKRKFTIDD		1250.656200	no-P	90.000008	1255.438187	0.261658	3.828465	0.273674	6.736211	0.004849
Aurora B	84	92	PKRKFTIDD		1119.615700	all-P	0.000000	1120.111210	0.112354	0.000000	0.000000	6.724514	0.002204
Aurora B	84	92	PKRKFTIDD		1119.615700	all-P	3.000000	1124.017875	0.034040	3.906665	0.117397	6.707891	0.020002
Aurora B	84	92	PKRKFTIDD		1119.615700	all-P	10.000000	1123.890744	0.114085	3.779534	0.160121	6.701940	0.020781
Aurora B	84	92	PKRKFTIDD		1119.615700	all-P	30.000002	1123.953965	0.096753	3.842755	0.148272	6.727066	0.014664
Aurora B	84	92	PKRKFTIDD		1119.615700	all-P	90.000008	1123.932003	0.201024	3.820792	0.230291	6.727567	0.018869
Aurora B	84	92	PKRKFTIDD		1119.615700	no-P	0.000000	1120.111210	0.112354	0.000000	0.000000	6.724514	0.002204
Aurora B	84	92	PKRKFTIDD		1119.615700	no-P	3.000000	1124.352666	0.218627	4.241455	0.245807	6.713870	0.016445
Aurora B	84	92	PKRKFTIDD		1119.615700	no-P	10.000000	1124.715706	0.544662	4.604496	0.556129	6.705074	0.018495
Aurora B	84	92	PKRKFTIDD		1119.615700	no-P	30.000002	1124.928950	0.252186	4.817740	0.276081	6.727127	0.021071
Aurora B	84	92	PKRKFTIDD		1119.615700	no-P	90.000008	1124.679673	0.250463	4.568463	0.274509	6.729385	0.007395
Aurora B	93	108	FDIGRPLGKGKFGNVY		1767.954100	all-P	0.000000	1769.383817	0.107687	0.000000	0.000000	8.346232	0.015010
Aurora B	93	108	FDIGRPLGKGKFGNVY		1767.954100	all-P	3.000000	1774.563677	0.084766	5.179860	0.137047	8.340171	0.020443
Aurora B	93	108	FDIGRPLGKGKFGNVY		1767.954100	all-P	10.000000	1774.917107	0.124293	5.533290	0.164455	8.333217	0.017762
Aurora B	93	108	FDIGRPLGKGKFGNVY		1767.954100	all-P	30.000002	1775.423006	0.127419	6.039189	0.166829	8.350301	0.012671
Aurora B	93	108	FDIGRPLGKGKFGNVY		1767.954100	all-P	90.000008	1776.007939	0.076932	6.624122	0.132344	8.367932	0.017163
Aurora B	93	108	FDIGRPLGKGKFGNVY		1767.954100	no-P	0.000000	1769.383817	0.107687	0.000000	0.000000	8.346232	0.015010
Aurora B	93	108	FDIGRPLGKGKFGNVY		1767.954100	no-P	3.000000	1774.767930	0.125949	5.384113	0.165710	8.345297	0.023461
Aurora B	93	108	FDIGRPLGKGKFGNVY		1767.954100	no-P	10.000000	1775.099351	0.090247	5.715534	0.140502	8.342564	0.024595
Aurora B	93	108	FDIGRPLGKGKFGNVY		1767.954100	no-P	30.000002	1775.675200	0.072123	6.291382	0.129608	8.360673	0.017770
Aurora B	93	108	FDIGRPLGKGKFGNVY		1767.954100	no-P	90.000008	1776.463273	0.112321	7.079456	0.155604	8.362152	0.012557
Aurora B	93	109	FDIGRPLGKGKFGNVYL		1881.038100	all-P	0.000000	1882.535096	0.084138	0.000000	0.000000	9.140989	0.002747
Aurora B	93	109	FDIGRPLGKGKFGNVYL		1881.038100	all-P	3.000000	1887.700551	0.076830	5.165455	0.113939	9.152433	0.030361
Aurora B	93	109	FDIGRPLGKGKFGNVYL		1881.038100	all-P	10.000000	1888.103025	0.099010	5.567929	0.129931	9.138817	0.019749
Aurora B	93	109	FDIGRPLGKGKFGNVYL		1881.038100	all-P	30.000002	1888.641874	0.055471	6.106779	0.100778	9.168833	0.016126
Aurora B	93	109	FDIGRPLGKGKFGNVYL		1881.038100	all-P	90.000008	1889.258759	0.070561	6.723663	0.109809	9.178027	0.019407
Aurora B	93	109	FDIGRPLGKGKFGNVYL		1881.038100	no-P	0.000000	1882.535096	0.084138	0.000000	0.000000	9.140989	0.002747
Aurora B	93	109	FDIGRPLGKGKFGNVYL		1881.038100	no-P	3.000000	1887.972029	0.089847	5.436934	0.123092	9.159894	0.020701
Aurora B	93	109	FDIGRPLGKGKFGNVYL		1881.038100	no-P	10.000000	1888.331250	0.054832	5.796155	0.100428	9.146761	0.023687
Aurora B	93	109	FDIGRPLGKGKFGNVYL		1881.038100	no-P	30.000002	1888.942002	0.072700	6.406907	0.111195	9.170728	0.014349
Aurora B	93	109	FDIGRPLGKGKFGNVYL		1881.038100	no-P	90.000008	1889.708253	0.058035	7.173157	0.102212	9.176684	0.016537
Aurora B	94	109	DIGRPLGKGKFGNVYL		1733.969700	all-P	0.000000	1734.923780	0.107948	0.000000	0.000000	9.158905	0.009921
Aurora B	94	109	DIGRPLGKGKFGNVYL		1733.969700	all-P	3.000000	1739.987610	0.120711	5.063831	0.161938	9.152206	0.025299
Aurora B	94	109	DIGRPLGKGKFGNVYL		1733.969700	all-P	10.000000	1740.225646	0.147461	5.301866	0.182750	9.144466	0.023263
Aurora B	94	109	DIGRPLGKGKFGNVYL		1733.969700	all-P	30.000002	1740.618544	0.140860	5.694764	0.177466	9.173521	0.015517
Aurora B	94	109	DIGRPLGKGKFGNVYL		1733.969700	all-P	90.000008	1741.255275	0.189822	6.331495	0.218369	9.179074	0.017766
Aurora B	94	109	DIGRPLGKGKFGNVYL		1733.969700	no-P	0.000000	1734.923780	0.107948	0.000000	0.000000	9.158905	0.009921
Aurora B	94	109	DIGRPLGKGKFGNVYL		1733.969700	no-P	3.000000	1740.193237	0.230380	5.269457	0.254416	9.158528	0.022301
Aurora B	94	109	DIGRPLGKGKFGNVYL		1733.969700	no-P	10.000000	1740.458932	0.127085	5.535152	0.166743	9.147771	0.020570
Aurora B	94	109	DIGRPLGKGKFGNVYL		1733.969700	no-P	30.000002	1740.964777	0.089400	6.040998	0.140161	9.187896	0.011521
Aurora B	94	109	DIGRPLGKGKFGNVYL		1733.969700	no-P	90.000008	1741.843045	0.231380	6.919266	0.255322	9.178024	0.010242
Aurora B	95	109	IGRPLGKGKFGNVYL		1618.942800	all-P	0.000000	1619.775774	0.043922	0.000000	0.000000	9.158606	0.007347
Aurora B	95	109	IGRPLGKGKFGNVYL		1618.942800	all-P	3.000000	1624.633078	0.250344	4.857304	0.254168	9.153864	0.020592
Aurora B	95	109	IGRPLGKGKFGNVYL		1618.942800	all-P	10.000000	1624.750343	0.224618	4.974569	0.228872	9.138545	0.025275
Aurora B	95	109	IGRPLGKGKFGNVYL		1618.942800	all-P	30.000002	1624.994374	0.433189	5.218600	0.435410	9.170362	0.017246
Aurora B	95	109	IGRPLGKGKFGNVYL		1618.942800	all-P	90.000008	1625.875512	0.044572	6.099738	0.062576	9.186826	0.017042
Aurora B	95	109	IGRPLGKGKFGNVYL		1618.942800	no-P	0.000000	1619.775774	0.043922	0.000000	0.000000	9.158606	0.007347
Aurora B	95	109	IGRPLGKGKFGNVYL		1618.942800	no-P	3.000000	1624.613454	0.409368	4.837680	0.411717	9.158514	0.015386
Aurora B	95	109	IGRPLGKGKFGNVYL		1618.942800	no-P	10.000000	1624.978081	0.446744	5.202306	0.448898	9.146583	0.019606
Aurora B	95	109	IGRPLGKGKFGNVYL		1618.942800	no-P	30.000002	1625.220094	0.674841	5.444320	0.676269	9.178020	0.009475
Aurora B	95	109	IGRPLGKGKFGNVYL		1618.942800	no-P	90.000008	1626.112693	0.176954	6.336919	0.182323	9.177414	0.019021
Aurora B	108	117	YLAREKQNKF		1296.705900	all-P	0.000000	1297.229821	0.073623	0.000000	0.000000	6.136637	0.009246
Aurora B	108	117	YLAREKQNKF		1296.705900	all-P	3.000000	1299.479614	0.472124	2.249793	0.477830	6.132714	0.023376
Aurora B	108	117	YLAREKQNKF		1296.705900	all-P	10.000000	1299.643424	0.248911	2.413603	0.259571	6.116910	0.020685
Aurora B	108	117	YLAREKQNKF		1296.705900	all-P	30.000002	1299.851600	0.337229	2.621779	0.345172	6.147366	0.015667
Aurora B	108	117	YLAREKQNKF		1296.705900	all-P	90.000008	1300.045899	0.421423	2.816078	0.427806	6.149197	0.025575
Aurora B	108	117	YLAREKQNKF		1296.705900	no-P	0.000000	1297.229821	0.073623	0.000000	0.000000	6.136637	0.009246
Aurora B	108	117	YLAREKQNKF		1296.705900	no-P	3.000000	1299.561509	0.220876	2.331688	0.232823	6.129107	0.016839
Aurora B	108	117	YLAREKQNKF		1296.705900	no-P	10.000000	1299.813781	0.228536	2.583960	0.240102	6.131486	0.018450
Aurora B	108	117	YLAREKQNKF		1296.705900	no-P	30.000002	1299.807731	0.527856	2.577911	0.532965	6.142022	0.014317
Aurora B	108	117	YLAREKQNKF		1296.705900	no-P	90.000008	1300.187145	0.265816	2.957324	0.275823	6.147528	0.006621
Aurora B	109	117	LAREKQNKF		1133.642600	all-P	0.000000	1134.729035	0.087815	0.000000	0.000000	5.547680	0.003853
Aurora B	109	117	LAREKQNKF		1133.642600	all-P	3.000000	1136.168421	0.083360	1.439386	0.121080	5.552481	0.015173
Aurora B	109	117	LAREKQNKF		1133.642600	all-P	10.000000	1136.356096	0.033420	1.627061	0.093959	5.540761	0.018570
Aurora B	109	117	LAREKQNKF		1133.642600	all-P	30.000002	1136.504883	0.028949	1.775848	0.092464	5.557600	0.021248
Aurora B	109	117	LAREKQNKF		1133.642600	all-P	90.000008	1136.682409	0.049420	1.953374	0.100766	5.558554	0.025193
Aurora B	109	117	LAREKQNKF		1133.642600	no-P	0.000000	1134.729035	0.087815	0.000000	0.000000	5.547680	0.003853
Aurora B	109	117	LAREKQNKF		1133.642600	no-P	3.000000	1136.207870	0.050373	1.478835	0.101237	5.552644	0.011206
Aurora B	109	117	LAREKQNKF		1133.642600	no-P	10.000000	1136.400656	0.074590	1.671621	0.115218	5.552864	0.015485
Aurora B	109	117	LAREKQNKF		1133.642600	no-P	30.000002	1136.567388	0.012393	1.838353	0.088685	5.551127	0.015737
Aurora B	109	117	LAREKQNKF		1133.642600	no-P	90.000008	1136.736180	0.029353	2.007145	0.092591	5.562973	0.002567
Aurora B	109	120	LAREKQNKFIMA		1448.804200	all-P	0.000000	1449.830254	0.093462	0.000000	0.000000	7.214738	0.007587
Aurora B	109	120	LAREKQNKFIMA		1448.804200	all-P	3.000000	1451.545163	0.100604	1.714909	0.137318	7.205604	0.023657
Aurora B	109	120	LAREKQNKFIMA		1448.804200	all-P	10.000000	1451.844998	0.143898	2.014744	0.171586	7.187895	0.016215
Aurora B	109	120	LAREKQNKFIMA		1448.804200	all-P	30.000002	1452.094437	0.123583	2.264183	0.154945	7.220599	0.013090
Aurora B	109	120	LAREKQNKFIMA		1448.804200	all-P	90.000008	1452.338151	0.099527	2.507897	0.136531	7.238163	0.024855
Aurora B	109	120	LAREKQNKFIMA		1448.804200	no-P	0.000000	1449.830254	0.093462	0.000000	0.000000	7.214738	0.007587
Aurora B	109	120	LAREKQNKFIMA		1448.804200	no-P	3.000000	1451.754669	0.148262	1.924416	0.175262	7.208190	0.017910
Aurora B	109	120	LAREKQNKFIMA		1448.804200	no-P	10.000000	1452.024672	0.165231	2.194418	0.189833	7.200266	0.017093
Aurora B	109	120	LAREKQNKFIMA		1448.804200	no-P	30.000002	1452.336458	0.165141	2.506205	0.189754	7.218234	0.020840
Aurora B	109	120	LAREKQNKFIMA		1448.804200	no-P	90.000008	1452.733390	0.141959	2.903136	0.169963	7.227624	0.015204
Aurora B	109	121	LAREKQNKFIMAL		1561.888300	all-P	0.000000	1563.099527	0.187225	0.000000	0.000000	8.862022	0.008274
Aurora B	109	121	LAREKQNKFIMAL		1561.888300	all-P	3.000000	1564.666669	0.126860	1.567142	0.226156	8.852766	0.029166
Aurora B	109	121	LAREKQNKFIMAL		1561.888300	all-P	10.000000	1564.923256	0.158594	1.823729	0.245368	8.837379	0.020391
Aurora B	109	121	LAREKQNKFIMAL		1561.888300	all-P	30.000002	1565.198495	0.170285	2.098969	0.253081	8.874464	0.015238
Aurora B	109	121	LAREKQNKFIMAL		1561.888300	all-P	90.000008	1565.473250	0.157273	2.373723	0.244516	8.886215	0.017285
Aurora B	109	121	LAREKQNKFIMAL		1561.888300	no-P	0.000000	1563.099527	0.187225	0.000000	0.000000	8.862022	0.008274
Aurora B	109	121	LAREKQNKFIMAL		1561.888300	no-P	3.000000	1564.899766	0.195635	1.800239	0.270788	8.859052	0.019591
Aurora B	109	121	LAREKQNKFIMAL		1561.888300	no-P	10.000000	1565.192288	0.203424	2.092761	0.276469	8.854401	0.025475
Aurora B	109	121	LAREKQNKFIMAL		1561.888300	no-P	30.000002	1565.582040	0.237610	2.482513	0.302510	8.873682	0.019812
Aurora B	109	121	LAREKQNKFIMAL		1561.888300	no-P	90.000008	1565.916164	0.230416	2.816637	0.296892	8.883570	0.007363
Aurora B	110	117	AREKQNKF		1020.558500	all-P	0.000000	1021.541190	0.112559	0.000000	0.000000	5.128967	0.006445
Aurora B	110	117	AREKQNKF		1020.558500	all-P	3.000000	1022.986319	0.045984	1.445129	0.121590	5.141573	0.014126
Aurora B	110	117	AREKQNKF		1020.558500	all-P	10.000000	1023.208699	0.017894	1.667509	0.113973	5.127674	0.014114
Aurora B	110	117	AREKQNKF		1020.558500	all-P	30.000002	1023.334771	0.049722	1.793581	0.123052	5.134115	0.028279
Aurora B	110	117	AREKQNKF		1020.558500	all-P	90.000008	1023.512158	0.060504	1.970968	0.127790	5.148989	0.046018
Aurora B	110	117	AREKQNKF		1020.558500	no-P	0.000000	1021.541190	0.112559	0.000000	0.000000	5.128967	0.006445
Aurora B	110	117	AREKQNKF		1020.558500	no-P	3.000000	1022.979745	0.081338	1.438555	0.138872	5.133111	0.006555
Aurora B	110	117	AREKQNKF		1020.558500	no-P	10.000000	1023.184583	0.070176	1.643393	0.132643	5.133135	0.012263
Aurora B	110	117	AREKQNKF		1020.558500	no-P	30.000002	1023.339009	0.019047	1.797819	0.114159	5.132473	0.030078
Aurora B	110	117	AREKQNKF		1020.558500	no-P	90.000008	1023.573488	0.022177	2.032298	0.114723	5.150773	0.009653
Aurora B	110	119	AREKQNKFIM		1264.683100	all-P	0.000000	1265.671945	0.042894	0.000000	0.000000	7.348559	0.002602
Aurora B	110	119	AREKQNKFIM		1264.683100	all-P	3.000000	1267.407107	0.134670	1.735162	0.141337	7.344984	0.023737
Aurora B	110	119	AREKQNKFIM		1264.683100	all-P	10.000000	1267.676805	0.153799	2.004860	0.159668	7.333862	0.022763
Aurora B	110	119	AREKQNKFIM		1264.683100	all-P	30.000002	1267.923030	0.183285	2.251085	0.188238	7.361094	0.015297
Aurora B	110	119	AREKQNKFIM		1264.683100	all-P	90.000008	1268.196616	0.204339	2.524671	0.208792	7.366527	0.027250
Aurora B	110	119	AREKQNKFIM		1264.683100	no-P	0.000000	1265.671945	0.042894	0.000000	0.000000	7.348559	0.002602
Aurora B	110	119	AREKQNKFIM		1264.683100	no-P	3.000000	1267.530657	0.149948	1.858712	0.155962	7.345509	0.015138
Aurora B	110	119	AREKQNKFIM		1264.683100	no-P	10.000000	1267.800203	0.147039	2.128258	0.153168	7.344194	0.021264
Aurora B	110	119	AREKQNKFIM		1264.683100	no-P	30.000002	1268.064291	0.176755	2.392346	0.181885	7.370510	0.012938
Aurora B	110	119	AREKQNKFIM		1264.683100	no-P	90.000008	1268.410230	0.183089	2.738284	0.188047	7.370536	0.010651
Aurora B	110	120	AREKQNKFIMA		1335.720200	all-P	0.000000	1336.826886	0.110745	0.000000	0.000000	7.057959	0.004768
Aurora B	110	120	AREKQNKFIMA		1335.720200	all-P	3.000000	1338.408712	0.164971	1.581827	0.198696	7.046825	0.020453
Aurora B	110	120	AREKQNKFIMA		1335.720200	all-P	10.000000	1338.660868	0.179428	1.833982	0.210853	7.037743	0.018513
Aurora B	110	120	AREKQNKFIMA		1335.720200	all-P	30.000002	1338.967042	0.236995	2.140157	0.261593	7.067712	0.012105
Aurora B	110	120	AREKQNKFIMA		1335.720200	all-P	90.000008	1339.256148	0.224578	2.429262	0.250399	7.076168	0.019920
Aurora B	110	120	AREKQNKFIMA		1335.720200	no-P	0.000000	1336.826886	0.110745	0.000000	0.000000	7.057959	0.004768
Aurora B	110	120	AREKQNKFIMA		1335.720200	no-P	3.000000	1338.614846	0.186106	1.787960	0.216564	7.056993	0.011820
Aurora B	110	120	AREKQNKFIMA		1335.720200	no-P	10.000000	1338.894362	0.224954	2.067476	0.250737	7.047313	0.021014
Aurora B	110	120	AREKQNKFIMA		1335.720200	no-P	30.000002	1339.202127	0.217800	2.375241	0.244338	7.067862	0.015216
Aurora B	110	120	AREKQNKFIMA		1335.720200	no-P	90.000008	1339.530527	0.240302	2.703641	0.264593	7.075000	0.014213
Aurora B	110	121	AREKQNKFIMAL		1448.804200	all-P	0.000000	1449.965926	0.116756	0.000000	0.000000	8.755827	0.007263
Aurora B	110	121	AREKQNKFIMAL		1448.804200	all-P	3.000000	1451.466379	0.129659	1.500453	0.174481	8.749660	0.023331
Aurora B	110	121	AREKQNKFIMAL		1448.804200	all-P	10.000000	1451.745406	0.183508	1.779480	0.217502	8.741810	0.021981
Aurora B	110	121	AREKQNKFIMAL		1448.804200	all-P	30.000002	1452.008193	0.165648	2.042267	0.202661	8.775227	0.023233
Aurora B	110	121	AREKQNKFIMAL		1448.804200	all-P	90.000008	1452.270256	0.161939	2.304330	0.199640	8.791403	0.021405
Aurora B	110	121	AREKQNKFIMAL		1448.804200	no-P	0.000000	1449.965926	0.116756	0.000000	0.000000	8.755827	0.007263
Aurora B	110	121	AREKQNKFIMAL		1448.804200	no-P	3.000000	1451.692516	0.137562	1.726590	0.180430	8.758141	0.021410
Aurora B	110	121	AREKQNKFIMAL		1448.804200	no-P	10.000000	1451.993054	0.181745	2.027128	0.216017	8.751891	0.025586
Aurora B	110	121	AREKQNKFIMAL		1448.804200	no-P	30.000002	1452.340444	0.185012	2.374518	0.218772	8.778078	0.014255
Aurora B	110	121	AREKQNKFIMAL		1448.804200	no-P	90.000008	1452.598641	0.188843	2.632715	0.222021	8.785871	0.018010
Aurora B	118	121	IMAL		447.263600	all-P	0.000000	448.004249	0.048773	0.000000	0.000000	8.601819	0.009364
Aurora B	118	121	IMAL		447.263600	all-P	3.000000	448.054216	0.039692	0.049967	0.062883	8.612725	0.025549
Aurora B	118	121	IMAL		447.263600	all-P	10.000000	448.088555	0.001975	0.084306	0.048813	8.597537	0.008961
Aurora B	118	121	IMAL		447.263600	all-P	30.000002	448.122951	0.006214	0.118701	0.049167	8.628325	0.021255
Aurora B	118	121	IMAL		447.263600	all-P	90.000008	448.129636	0.031168	0.125387	0.057881	8.639609	0.011281
Aurora B	118	121	IMAL		447.263600	no-P	0.000000	448.004249	0.048773	0.000000	0.000000	8.601819	0.009364
Aurora B	118	121	IMAL		447.263600	no-P	3.000000	448.041426	0.035789	0.037177	0.060495	8.619830	0.018832
Aurora B	118	121	IMAL		447.263600	no-P	10.000000	448.063858	0.020678	0.059608	0.052975	8.618138	0.023159
Aurora B	118	121	IMAL		447.263600	no-P	30.000002	448.118316	0.031407	0.114066	0.058010	8.627068	0.017281
Aurora B	118	121	IMAL		447.263600	no-P	90.000008	448.101857	0.024719	0.097608	0.054679	8.635699	0.022806
Aurora B	120	125	ALKVLF		690.454900	all-P	0.000000	690.996544	0.108558	0.000000	0.000000	9.535773	0.004837
Aurora B	120	125	ALKVLF		690.454900	all-P	3.000000	691.207263	0.064132	0.210719	0.126086	9.531055	0.030999
Aurora B	120	125	ALKVLF		690.454900	all-P	10.000000	691.517778	0.033386	0.521234	0.113576	9.515036	0.027540
Aurora B	120	125	ALKVLF		690.454900	all-P	30.000002	691.705310	0.050257	0.708766	0.119627	9.546144	0.014771
Aurora B	120	125	ALKVLF		690.454900	all-P	90.000008	691.750541	0.047084	0.753997	0.118329	9.562474	0.013569
Aurora B	120	125	ALKVLF		690.454900	no-P	0.000000	690.996544	0.108558	0.000000	0.000000	9.535773	0.004837
Aurora B	120	125	ALKVLF		690.454900	no-P	3.000000	691.440806	0.067934	0.444263	0.128062	9.527953	0.021860
Aurora B	120	125	ALKVLF		690.454900	no-P	10.000000	691.675149	0.041699	0.678605	0.116292	9.522091	0.022429
Aurora B	120	125	ALKVLF		690.454900	no-P	30.000002	691.820627	0.051244	0.824084	0.120045	9.548244	0.015324
Aurora B	120	125	ALKVLF		690.454900	no-P	90.000008	691.806825	0.031332	0.810281	0.112989	9.553676	0.011655
Aurora B	121	125	LKVLF		619.417800	all-P	0.000000	619.947925	0.018596	0.000000	0.000000	9.449280	0.005299
Aurora B	121	125	LKVLF		619.417800	all-P	3.000000	620.173372	0.036496	0.225447	0.040961	9.432141	0.025927
Aurora B	121	125	LKVLF		619.417800	all-P	10.000000	620.467949	0.004737	0.520023	0.019190	9.419930	0.019795
Aurora B	121	125	LKVLF		619.417800	all-P	30.000002	620.652936	0.029162	0.705011	0.034586	9.454700	0.014744
Aurora B	121	125	LKVLF		619.417800	all-P	90.000008	620.708192	0.015383	0.760266	0.024134	9.466551	0.019480
Aurora B	121	125	LKVLF		619.417800	no-P	0.000000	619.947925	0.018596	0.000000	0.000000	9.449280	0.005299
Aurora B	121	125	LKVLF		619.417800	no-P	3.000000	620.357685	0.035776	0.409759	0.040320	9.439342	0.019477
Aurora B	121	125	LKVLF		619.417800	no-P	10.000000	620.611278	0.008463	0.663352	0.020431	9.434536	0.022929
Aurora B	121	125	LKVLF		619.417800	no-P	30.000002	620.713608	0.005193	0.765683	0.019307	9.457686	0.010699
Aurora B	121	125	LKVLF		619.417800	no-P	90.000008	620.722488	0.009108	0.774562	0.020706	9.464722	0.008376
Aurora B	122	125	KVLF		506.333700	all-P	0.000000	506.539008	0.038883	0.000000	0.000000	8.626407	0.013394
Aurora B	122	125	KVLF		506.333700	all-P	3.000000	506.824416	0.000000	0.285408	0.038883	8.630946	0.000000
Aurora B	122	125	KVLF		506.333700	all-P	10.000000	507.716617	0.000000	1.177610	0.038883	8.582819	0.000000
Aurora B	122	125	KVLF		506.333700	all-P	30.000002	507.525429	0.125450	0.986422	0.131337	8.631258	0.018184
Aurora B	122	125	KVLF		506.333700	all-P	90.000008	507.595109	0.005403	1.056101	0.039257	8.613394	0.006188
Aurora B	122	125	KVLF		506.333700	no-P	0.000000	506.539008	0.038883	0.000000	0.000000	8.626407	0.013394
Aurora B	122	125	KVLF		506.333700	no-P	3.000000	506.792190	0.000000	0.253182	0.038883	8.649895	0.000000
Aurora B	122	125	KVLF		506.333700	no-P	30.000002	507.054081	0.000000	0.515074	0.038883	8.610427	0.000000
Aurora B	124	129	LFKSQL		735.440000	all-P	0.000000	735.792891	0.024243	0.000000	0.000000	7.555588	0.002083
Aurora B	124	129	LFKSQL		735.440000	all-P	3.000000	737.189930	0.110457	1.397039	0.113086	7.553614	0.020216
Aurora B	124	129	LFKSQL		735.440000	all-P	10.000000	737.364401	0.069889	1.571510	0.073974	7.543873	0.019002
Aurora B	124	129	LFKSQL		735.440000	all-P	30.000002	737.660002	0.122970	1.867111	0.125337	7.565777	0.008879
Aurora B	124	129	LFKSQL		735.440000	all-P	90.000008	737.825498	0.210550	2.032607	0.211941	7.572564	0.013354
Aurora B	124	129	LFKSQL		735.440000	no-P	0.000000	735.792891	0.024243	0.000000	0.000000	7.555588	0.002083
Aurora B	124	129	LFKSQL		735.440000	no-P	3.000000	737.530814	0.297561	1.737923	0.298547	7.558687	0.015487
Aurora B	124	129	LFKSQL		735.440000	no-P	10.000000	737.638697	0.089615	1.845806	0.092837	7.546577	0.015095
Aurora B	124	129	LFKSQL		735.440000	no-P	30.000002	738.030597	0.105848	2.237706	0.108589	7.562482	0.014971
Aurora B	124	129	LFKSQL		735.440000	no-P	90.000008	738.418321	0.242681	2.625430	0.243889	7.568688	0.007790
Aurora B	126	143	KSQLEKEGVEHQLRREIE		2208.173100	all-P	0.000000	2209.559276	0.115694	0.000000	0.000000	6.747569	0.003909
Aurora B	126	143	KSQLEKEGVEHQLRREIE		2208.173100	all-P	3.000000	2212.745744	0.124548	3.186467	0.169992	6.700474	0.004587
Aurora B	126	143	KSQLEKEGVEHQLRREIE		2208.173100	all-P	10.000000	2213.903422	0.114714	4.344146	0.162924	6.707145	0.021117
Aurora B	126	143	KSQLEKEGVEHQLRREIE		2208.173100	all-P	30.000002	2215.451265	0.398514	5.891989	0.414968	6.722267	0.017694
Aurora B	126	143	KSQLEKEGVEHQLRREIE		2208.173100	all-P	90.000008	2216.567400	0.183345	7.008124	0.216796	6.709657	0.020757
Aurora B	126	143	KSQLEKEGVEHQLRREIE		2208.173100	no-P	0.000000	2209.559276	0.115694	0.000000	0.000000	6.747569	0.003909
Aurora B	126	143	KSQLEKEGVEHQLRREIE		2208.173100	no-P	3.000000	2214.334350	0.264756	4.775073	0.288931	6.717027	0.014017
Aurora B	126	143	KSQLEKEGVEHQLRREIE		2208.173100	no-P	10.000000	2215.746580	0.097192	6.187303	0.151101	6.689114	0.005581
Aurora B	126	143	KSQLEKEGVEHQLRREIE		2208.173100	no-P	30.000002	2217.428514	0.269684	7.869238	0.293453	6.704897	0.014605
Aurora B	126	143	KSQLEKEGVEHQLRREIE		2208.173100	no-P	90.000008	2218.362081	0.279328	8.802805	0.302339	6.709415	0.009379
Aurora B	130	137	EKEGVEHQ		955.448000	all-P	0.000000	956.070368	0.027641	0.000000	0.000000	2.596180	0.002909
Aurora B	130	137	EKEGVEHQ		955.448000	all-P	3.000000	958.907332	0.044956	2.836964	0.052774	2.593884	0.007559
Aurora B	130	137	EKEGVEHQ		955.448000	all-P	10.000000	959.330744	0.043770	3.260376	0.051767	2.592293	0.010364
Aurora B	130	137	EKEGVEHQ		955.448000	all-P	30.000002	959.699372	0.018685	3.629004	0.033364	2.600098	0.001557
Aurora B	130	137	EKEGVEHQ		955.448000	all-P	90.000008	959.862680	0.050886	3.792312	0.057909	2.594321	0.002584
Aurora B	130	137	EKEGVEHQ		955.448000	no-P	0.000000	956.070368	0.027641	0.000000	0.000000	2.596180	0.002909
Aurora B	130	137	EKEGVEHQ		955.448000	no-P	3.000000	959.460808	0.101155	3.390440	0.104863	2.592489	0.007363
Aurora B	130	137	EKEGVEHQ		955.448000	no-P	10.000000	959.715356	0.086645	3.644988	0.090947	2.591000	0.001782
Aurora B	130	137	EKEGVEHQ		955.448000	no-P	30.000002	959.868862	0.062100	3.798494	0.067974	2.591606	0.005264
Aurora B	130	137	EKEGVEHQ		955.448000	no-P	90.000008	959.930556	0.017448	3.860188	0.032687	2.598385	0.005044
Aurora B	130	142	EKEGVEHQLRREI		1622.860900	all-P	0.000000	1623.620498	0.026859	0.000000	0.000000	6.468044	0.004115
Aurora B	130	142	EKEGVEHQLRREI		1622.860900	all-P	3.000000	1625.859136	0.214861	2.238638	0.216533	6.437696	0.016762
Aurora B	130	142	EKEGVEHQLRREI		1622.860900	all-P	10.000000	1626.353905	0.146154	2.733406	0.148602	6.419529	0.014600
Aurora B	130	142	EKEGVEHQLRREI		1622.860900	all-P	30.000002	1627.272163	0.401161	3.651665	0.402059	6.430553	0.008223
Aurora B	130	142	EKEGVEHQLRREI		1622.860900	all-P	90.000008	1628.046544	0.080068	4.426046	0.084453	6.438121	0.022068
Aurora B	130	142	EKEGVEHQLRREI		1622.860900	no-P	0.000000	1623.620498	0.026859	0.000000	0.000000	6.468044	0.004115
Aurora B	130	142	EKEGVEHQLRREI		1622.860900	no-P	3.000000	1626.423385	0.208860	2.802887	0.210580	6.439144	0.008855
Aurora B	130	142	EKEGVEHQLRREI		1622.860900	no-P	10.000000	1627.591615	0.060041	3.971117	0.065775	6.418415	0.013753
Aurora B	130	142	EKEGVEHQLRREI		1622.860900	no-P	30.000002	1628.742045	0.214438	5.121546	0.216114	6.424890	0.019378
Aurora B	130	142	EKEGVEHQLRREI		1622.860900	no-P	90.000008	1629.480106	0.126637	5.859607	0.129454	6.424757	0.005300
Aurora B	130	143	EKEGVEHQLRREIE		1751.903500	all-P	0.000000	1753.468089	0.074782	0.000000	0.000000	6.466441	0.012051
Aurora B	130	143	EKEGVEHQLRREIE		1751.903500	all-P	3.000000	1755.727930	0.132429	2.259841	0.152085	6.428572	0.011632
Aurora B	130	143	EKEGVEHQLRREIE		1751.903500	all-P	10.000000	1756.528706	0.147920	3.060617	0.165749	6.416256	0.013209
Aurora B	130	143	EKEGVEHQLRREIE		1751.903500	all-P	30.000002	1757.420113	0.166455	3.952025	0.182482	6.425016	0.011011
Aurora B	130	143	EKEGVEHQLRREIE		1751.903500	all-P	90.000008	1758.154757	0.079307	4.686668	0.109004	6.431340	0.014882
Aurora B	130	143	EKEGVEHQLRREIE		1751.903500	no-P	0.000000	1753.468089	0.074782	0.000000	0.000000	6.466441	0.012051
Aurora B	130	143	EKEGVEHQLRREIE		1751.903500	no-P	3.000000	1756.531886	0.091683	3.063798	0.118313	6.437445	0.015317
Aurora B	130	143	EKEGVEHQLRREIE		1751.903500	no-P	10.000000	1757.664352	0.138857	4.196264	0.157714	6.411125	0.010197
Aurora B	130	143	EKEGVEHQLRREIE		1751.903500	no-P	30.000002	1758.792348	0.064732	5.324259	0.098907	6.425656	0.023194
Aurora B	130	143	EKEGVEHQLRREIE		1751.903500	no-P	90.000008	1759.605447	0.094145	6.137358	0.120232	6.423899	0.004380
Aurora B	130	156	EKEGVEHQLRREIEIQSHLRHPNILRM		3347.786600	all-P	0.000000	3350.145626	0.202196	0.000000	0.000000	8.348847	0.011574
Aurora B	130	156	EKEGVEHQLRREIEIQSHLRHPNILRM		3347.786600	all-P	3.000000	3352.795780	0.163341	2.650154	0.259930	8.336439	0.021125
Aurora B	130	156	EKEGVEHQLRREIEIQSHLRHPNILRM		3347.786600	all-P	10.000000	3353.649775	0.174759	3.504150	0.267253	8.327830	0.020578
Aurora B	130	156	EKEGVEHQLRREIEIQSHLRHPNILRM		3347.786600	all-P	30.000002	3355.048778	0.211443	4.903152	0.292560	8.339240	0.016364
Aurora B	130	156	EKEGVEHQLRREIEIQSHLRHPNILRM		3347.786600	all-P	90.000008	3356.305394	0.125731	6.159768	0.238100	8.344707	0.017914
Aurora B	130	156	EKEGVEHQLRREIEIQSHLRHPNILRM		3347.786600	no-P	0.000000	3350.144068	0.192755	0.000000	0.000000	8.348471	0.012719
Aurora B	130	156	EKEGVEHQLRREIEIQSHLRHPNILRM		3347.786600	no-P	3.000000	3354.090948	0.282876	3.946880	0.342305	8.341188	0.023750
Aurora B	130	156	EKEGVEHQLRREIEIQSHLRHPNILRM		3347.786600	no-P	10.000000	3355.483413	0.258138	5.339344	0.322164	8.317196	0.014269
Aurora B	130	156	EKEGVEHQLRREIEIQSHLRHPNILRM		3347.786600	no-P	30.000002	3356.954879	0.291878	6.810810	0.349781	8.335027	0.006515
Aurora B	130	156	EKEGVEHQLRREIEIQSHLRHPNILRM		3347.786600	no-P	90.000008	3358.366491	0.303546	8.222422	0.359575	8.344227	0.012185
Aurora B	132	143	EGVEHQLRREIE		1494.765900	all-P	0.000000	1495.735619	0.043740	0.000000	0.000000	6.466036	0.002673
Aurora B	132	143	EGVEHQLRREIE		1494.765900	all-P	3.000000	1497.453302	0.057283	1.717683	0.072073	6.432044	0.015389
Aurora B	132	143	EGVEHQLRREIE		1494.765900	all-P	10.000000	1498.066435	0.038126	2.330816	0.058024	6.418201	0.015697
Aurora B	132	143	EGVEHQLRREIE		1494.765900	all-P	30.000002	1498.736515	0.142931	3.000896	0.149474	6.424666	0.007536
Aurora B	132	143	EGVEHQLRREIE		1494.765900	all-P	90.000008	1499.359206	0.077905	3.623587	0.089344	6.431797	0.021052
Aurora B	132	143	EGVEHQLRREIE		1494.765900	no-P	0.000000	1495.735619	0.043740	0.000000	0.000000	6.466036	0.002673
Aurora B	132	143	EGVEHQLRREIE		1494.765900	no-P	3.000000	1498.094348	0.083530	2.358729	0.094290	6.440423	0.014191
Aurora B	132	143	EGVEHQLRREIE		1494.765900	no-P	10.000000	1499.076868	0.032803	3.341249	0.054674	6.418466	0.017101
Aurora B	132	143	EGVEHQLRREIE		1494.765900	no-P	30.000002	1499.945371	0.078228	4.209752	0.089626	6.424692	0.014070
Aurora B	132	143	EGVEHQLRREIE		1494.765900	no-P	90.000008	1500.512215	0.004602	4.776595	0.043982	6.426964	0.002329
Aurora B	142	154	IEIQSHLRHPNIL		1569.886000	all-P	0.000000	1570.843950	0.070785	0.000000	0.000000	7.836462	0.005617
Aurora B	142	154	IEIQSHLRHPNIL		1569.886000	all-P	3.000000	1572.093975	0.087141	1.250025	0.112268	7.827694	0.028365
Aurora B	142	154	IEIQSHLRHPNIL		1569.886000	all-P	10.000000	1572.388389	0.067537	1.544439	0.097835	7.818748	0.026457
Aurora B	142	154	IEIQSHLRHPNIL		1569.886000	all-P	30.000002	1572.895036	0.079296	2.051086	0.106294	7.849488	0.019568
Aurora B	142	154	IEIQSHLRHPNIL		1569.886000	all-P	90.000008	1573.461080	0.112318	2.617130	0.132762	7.855676	0.026443
Aurora B	142	154	IEIQSHLRHPNIL		1569.886000	no-P	0.000000	1570.843950	0.070785	0.000000	0.000000	7.836462	0.005617
Aurora B	142	154	IEIQSHLRHPNIL		1569.886000	no-P	3.000000	1572.335661	0.089923	1.491711	0.114441	7.833445	0.019750
Aurora B	142	154	IEIQSHLRHPNIL		1569.886000	no-P	10.000000	1572.906710	0.125709	2.062760	0.144268	7.824541	0.018271
Aurora B	142	154	IEIQSHLRHPNIL		1569.886000	no-P	30.000002	1573.631121	0.150165	2.787171	0.166012	7.844830	0.015152
Aurora B	142	154	IEIQSHLRHPNIL		1569.886000	no-P	90.000008	1574.364559	0.219080	3.520610	0.230231	7.852148	0.014490
Aurora B	142	156	IEIQSHLRHPNILRM		1857.027600	all-P	0.000000	1858.387624	0.147085	0.000000	0.000000	8.002411	0.008301
Aurora B	142	156	IEIQSHLRHPNILRM		1857.027600	all-P	3.000000	1859.485248	0.095046	1.097624	0.175122	7.996476	0.023999
Aurora B	142	156	IEIQSHLRHPNILRM		1857.027600	all-P	10.000000	1859.787052	0.108249	1.399429	0.182625	7.986137	0.019476
Aurora B	142	156	IEIQSHLRHPNILRM		1857.027600	all-P	30.000002	1860.227291	0.070759	1.839667	0.163220	8.023854	0.015070
Aurora B	142	156	IEIQSHLRHPNILRM		1857.027600	all-P	90.000008	1860.715677	0.091212	2.328053	0.173072	8.035133	0.022861
Aurora B	142	156	IEIQSHLRHPNILRM		1857.027600	no-P	0.000000	1858.387624	0.147085	0.000000	0.000000	8.002411	0.008301
Aurora B	142	156	IEIQSHLRHPNILRM		1857.027600	no-P	3.000000	1859.758972	0.085213	1.371348	0.169986	8.003458	0.022868
Aurora B	142	156	IEIQSHLRHPNILRM		1857.027600	no-P	10.000000	1860.269591	0.107932	1.881967	0.182438	7.999286	0.022825
Aurora B	142	156	IEIQSHLRHPNILRM		1857.027600	no-P	30.000002	1860.945725	0.096832	2.558101	0.176098	8.019989	0.019714
Aurora B	142	156	IEIQSHLRHPNILRM		1857.027600	no-P	90.000008	1861.542183	0.089438	3.154559	0.172143	8.028502	0.021358
Aurora B	144	152	IQSHLRHPN		1101.591200	all-P	0.000000	1102.317129	0.030270	0.000000	0.000000	6.420306	0.008910
Aurora B	144	152	IQSHLRHPN		1101.591200	all-P	3.000000	1103.242712	0.057913	0.925583	0.065347	6.414035	0.014840
Aurora B	144	152	IQSHLRHPN		1101.591200	all-P	10.000000	1103.438286	0.061055	1.121157	0.068147	6.402375	0.013770
Aurora B	144	152	IQSHLRHPN		1101.591200	all-P	30.000002	1103.827244	0.035576	1.510115	0.046711	6.420205	0.008358
Aurora B	144	152	IQSHLRHPN		1101.591200	all-P	90.000008	1104.298837	0.095032	1.981708	0.099736	6.428519	0.018475
Aurora B	144	152	IQSHLRHPN		1101.591200	no-P	0.000000	1102.317129	0.030270	0.000000	0.000000	6.420306	0.008910
Aurora B	144	152	IQSHLRHPN		1101.591200	no-P	3.000000	1103.397909	0.032841	1.080780	0.044663	6.416400	0.018129
Aurora B	144	152	IQSHLRHPN		1101.591200	no-P	10.000000	1103.819320	0.046422	1.502190	0.055419	6.408867	0.017460
Aurora B	144	152	IQSHLRHPN		1101.591200	no-P	30.000002	1104.316061	0.035188	1.998932	0.046416	6.421597	0.019339
Aurora B	144	152	IQSHLRHPN		1101.591200	no-P	90.000008	1104.773604	0.107831	2.456475	0.111999	6.425701	0.000283
Aurora B	144	153	IQSHLRHPNI		1214.675300	all-P	0.000000	1215.715656	0.093768	0.000000	0.000000	6.407609	0.015232
Aurora B	144	153	IQSHLRHPNI		1214.675300	all-P	3.000000	1216.664662	0.056832	0.949006	0.109647	6.418168	0.016291
Aurora B	144	153	IQSHLRHPNI		1214.675300	all-P	10.000000	1216.947717	0.068657	1.232061	0.116217	6.383483	0.006507
Aurora B	144	153	IQSHLRHPNI		1214.675300	all-P	30.000002	1217.307843	0.112032	1.592187	0.146095	6.415339	0.009006
Aurora B	144	153	IQSHLRHPNI		1214.675300	all-P	90.000008	1217.695898	0.161589	1.980243	0.186825	6.427839	0.022895
Aurora B	144	153	IQSHLRHPNI		1214.675300	no-P	0.000000	1215.715656	0.093768	0.000000	0.000000	6.407609	0.015232
Aurora B	144	153	IQSHLRHPNI		1214.675300	no-P	3.000000	1216.798168	0.065917	1.082512	0.114619	6.417405	0.019252
Aurora B	144	153	IQSHLRHPNI		1214.675300	no-P	10.000000	1217.194927	0.084953	1.479271	0.126529	6.402687	0.015913
Aurora B	144	153	IQSHLRHPNI		1214.675300	no-P	30.000002	1217.635523	0.120163	1.919868	0.152419	6.418304	0.021497
Aurora B	144	153	IQSHLRHPNI		1214.675300	no-P	90.000008	1218.001171	0.156463	2.285515	0.182409	6.426614	0.003082
Aurora B	144	154	IQSHLRHPNIL		1327.759300	all-P	0.000000	1328.905379	0.113590	0.000000	0.000000	7.297453	0.007657
Aurora B	144	154	IQSHLRHPNIL		1327.759300	all-P	3.000000	1329.817978	0.056648	0.912599	0.126932	7.300795	0.026893
Aurora B	144	154	IQSHLRHPNIL		1327.759300	all-P	10.000000	1330.065707	0.023350	1.160327	0.115965	7.285917	0.021913
Aurora B	144	154	IQSHLRHPNIL		1327.759300	all-P	30.000002	1330.433407	0.040737	1.528028	0.120674	7.312309	0.013831
Aurora B	144	154	IQSHLRHPNIL		1327.759300	all-P	90.000008	1330.775586	0.076777	1.870206	0.137104	7.317500	0.025491
Aurora B	144	154	IQSHLRHPNIL		1327.759300	no-P	0.000000	1328.905379	0.113590	0.000000	0.000000	7.297453	0.007657
Aurora B	144	154	IQSHLRHPNIL		1327.759300	no-P	3.000000	1329.972555	0.053305	1.067176	0.125476	7.299830	0.017584
Aurora B	144	154	IQSHLRHPNIL		1327.759300	no-P	10.000000	1330.330652	0.023714	1.425273	0.116039	7.292559	0.024100
Aurora B	144	154	IQSHLRHPNIL		1327.759300	no-P	30.000002	1330.784346	0.044674	1.878966	0.122060	7.304876	0.020062
Aurora B	144	154	IQSHLRHPNIL		1327.759300	no-P	90.000008	1331.133764	0.082438	2.228385	0.140352	7.322047	0.010342
Aurora B	144	156	IQSHLRHPNILRM		1614.900900	all-P	0.000000	1616.436662	0.059399	0.000000	0.000000	7.610707	0.010921
Aurora B	144	156	IQSHLRHPNILRM		1614.900900	all-P	3.000000	1617.260738	0.090302	0.824076	0.108086	7.603272	0.027362
Aurora B	144	156	IQSHLRHPNILRM		1614.900900	all-P	10.000000	1617.514377	0.047587	1.077715	0.076111	7.591895	0.023891
Aurora B	144	156	IQSHLRHPNILRM		1614.900900	all-P	30.000002	1617.853341	0.060797	1.416679	0.084997	7.614069	0.027794
Aurora B	144	156	IQSHLRHPNILRM		1614.900900	all-P	90.000008	1618.251586	0.040451	1.814923	0.071865	7.632736	0.027023
Aurora B	144	156	IQSHLRHPNILRM		1614.900900	no-P	0.000000	1616.436662	0.059399	0.000000	0.000000	7.610707	0.010921
Aurora B	144	156	IQSHLRHPNILRM		1614.900900	no-P	3.000000	1617.446916	0.055122	1.010254	0.081035	7.610171	0.021874
Aurora B	144	156	IQSHLRHPNILRM		1614.900900	no-P	10.000000	1617.802505	0.068134	1.365843	0.090391	7.596426	0.017839
Aurora B	144	156	IQSHLRHPNILRM		1614.900900	no-P	30.000002	1618.335269	0.022364	1.898606	0.063470	7.617915	0.014403
Aurora B	144	156	IQSHLRHPNILRM		1614.900900	no-P	90.000008	1618.742470	0.027237	2.305808	0.065346	7.623384	0.011518
Aurora B	145	153	QSHLRHPNI		1101.591200	all-P	0.000000	1103.151225	0.010852	0.000000	0.000000	6.225060	0.001333
Aurora B	145	153	QSHLRHPNI		1101.591200	all-P	3.000000	1109.394653	0.055198	6.243428	0.056254	6.206785	0.016260
Aurora B	145	153	QSHLRHPNI		1101.591200	all-P	10.000000	1109.408891	0.102474	6.257666	0.103047	6.199026	0.014073
Aurora B	145	153	QSHLRHPNI		1101.591200	all-P	30.000002	1109.498634	0.006476	6.347409	0.012638	6.221309	0.002230
Aurora B	145	153	QSHLRHPNI		1101.591200	all-P	90.000008	1109.550552	0.164496	6.399327	0.164854	6.229188	0.010613
Aurora B	145	153	QSHLRHPNI		1101.591200	no-P	0.000000	1103.151225	0.010852	0.000000	0.000000	6.225060	0.001333
Aurora B	145	153	QSHLRHPNI		1101.591200	no-P	3.000000	1109.367607	0.033588	6.216382	0.035297	6.212582	0.014405
Aurora B	145	153	QSHLRHPNI		1101.591200	no-P	10.000000	1109.299921	0.084115	6.148696	0.084812	6.202801	0.011120
Aurora B	145	153	QSHLRHPNI		1101.591200	no-P	30.000002	1109.610248	0.190053	6.459023	0.190363	6.215752	0.013960
Aurora B	145	153	QSHLRHPNI		1101.591200	no-P	90.000008	1109.614220	0.131196	6.462995	0.131644	6.213415	0.001833
Aurora B	145	154	QSHLRHPNIL		1214.675300	all-P	0.000000	1215.336379	0.031072	0.000000	0.000000	7.293566	0.009870
Aurora B	145	154	QSHLRHPNIL		1214.675300	all-P	3.000000	1216.315840	0.026151	0.979461	0.040612	7.293531	0.029708
Aurora B	145	154	QSHLRHPNIL		1214.675300	all-P	10.000000	1216.507367	0.009827	1.170988	0.032589	7.272580	0.015264
Aurora B	145	154	QSHLRHPNIL		1214.675300	all-P	30.000002	1216.875467	0.032535	1.539089	0.044989	7.307953	0.015910
Aurora B	145	154	QSHLRHPNIL		1214.675300	all-P	90.000008	1217.175387	0.070688	1.839008	0.077216	7.320316	0.022295
Aurora B	145	154	QSHLRHPNIL		1214.675300	no-P	0.000000	1215.336379	0.031072	0.000000	0.000000	7.293566	0.009870
Aurora B	145	154	QSHLRHPNIL		1214.675300	no-P	3.000000	1216.420620	0.018579	1.084241	0.036203	7.298286	0.019822
Aurora B	145	154	QSHLRHPNIL		1214.675300	no-P	10.000000	1216.826655	0.041371	1.490276	0.051740	7.287244	0.018914
Aurora B	145	154	QSHLRHPNIL		1214.675300	no-P	30.000002	1217.248720	0.014667	1.912342	0.034360	7.300439	0.012221
Aurora B	145	154	QSHLRHPNIL		1214.675300	no-P	90.000008	1217.552533	0.077064	2.216155	0.083092	7.319838	0.011600
Aurora B	146	153	SHLRHPNI		973.532600	all-P	0.000000	974.003315	0.006698	0.000000	0.000000	6.408643	0.003253
Aurora B	146	153	SHLRHPNI		973.532600	all-P	3.000000	974.881874	0.022006	0.878559	0.023003	6.411596	0.016597
Aurora B	146	153	SHLRHPNI		973.532600	all-P	10.000000	975.029763	0.065122	1.026448	0.065465	6.394489	0.019209
Aurora B	146	153	SHLRHPNI		973.532600	all-P	30.000002	975.319062	0.008242	1.315746	0.010621	6.413204	0.012109
Aurora B	146	153	SHLRHPNI		973.532600	all-P	90.000008	975.729571	0.155957	1.726255	0.156101	6.428596	0.017831
Aurora B	146	153	SHLRHPNI		973.532600	no-P	0.000000	974.003315	0.006698	0.000000	0.000000	6.408643	0.003253
Aurora B	146	153	SHLRHPNI		973.532600	no-P	3.000000	975.111581	0.150318	1.108266	0.150467	6.411814	0.010744
Aurora B	146	153	SHLRHPNI		973.532600	no-P	10.000000	975.268356	0.064762	1.265040	0.065107	6.404094	0.016750
Aurora B	146	153	SHLRHPNI		973.532600	no-P	30.000002	975.665311	0.037609	1.661996	0.038201	6.423497	0.014372
Aurora B	146	153	SHLRHPNI		973.532600	no-P	90.000008	975.839755	0.168195	1.836440	0.168328	6.428630	0.004956
Aurora B	151	156	PNILRM		743.423300	all-P	0.000000	743.821080	0.030778	0.000000	0.000000	7.604225	0.005500
Aurora B	151	156	PNILRM		743.423300	all-P	3.000000	744.178980	0.032813	0.357901	0.044989	7.600714	0.023102
Aurora B	151	156	PNILRM		743.423300	all-P	10.000000	744.185714	0.050297	0.364634	0.058967	7.593134	0.024006
Aurora B	151	156	PNILRM		743.423300	all-P	30.000002	744.239324	0.056386	0.418244	0.064239	7.611317	0.019418
Aurora B	151	156	PNILRM		743.423300	all-P	90.000008	744.348388	0.078200	0.527308	0.084039	7.635200	0.026564
Aurora B	151	156	PNILRM		743.423300	no-P	0.000000	743.821080	0.030778	0.000000	0.000000	7.604225	0.005500
Aurora B	151	156	PNILRM		743.423300	no-P	3.000000	744.176856	0.077351	0.355776	0.083249	7.604322	0.020132
Aurora B	151	156	PNILRM		743.423300	no-P	10.000000	744.223895	0.047394	0.402816	0.056511	7.599181	0.018612
Aurora B	151	156	PNILRM		743.423300	no-P	30.000002	744.346873	0.124069	0.525793	0.127829	7.615031	0.018721
Aurora B	151	156	PNILRM		743.423300	no-P	90.000008	744.534874	0.080635	0.713794	0.086309	7.625031	0.017896
Aurora B	155	167	RMYNYFHDRKRIY		1861.927900	all-P	0.000000	1863.170837	0.034451	0.000000	0.000000	7.445987	0.012887
Aurora B	155	167	RMYNYFHDRKRIY		1861.927900	all-P	3.000000	1864.294720	0.074109	1.123883	0.081725	7.428503	0.024340
Aurora B	155	167	RMYNYFHDRKRIY		1861.927900	all-P	10.000000	1864.342805	0.019652	1.171968	0.039661	7.415792	0.021245
Aurora B	155	167	RMYNYFHDRKRIY		1861.927900	all-P	30.000002	1864.521292	0.038679	1.350455	0.051797	7.444965	0.011435
Aurora B	155	167	RMYNYFHDRKRIY		1861.927900	all-P	90.000008	1864.715679	0.039351	1.544842	0.052300	7.445623	0.017559
Aurora B	155	167	RMYNYFHDRKRIY		1861.927900	no-P	0.000000	1863.170837	0.034451	0.000000	0.000000	7.445987	0.012887
Aurora B	155	167	RMYNYFHDRKRIY		1861.927900	no-P	3.000000	1864.339833	0.106907	1.168996	0.112321	7.437928	0.021451
Aurora B	155	167	RMYNYFHDRKRIY		1861.927900	no-P	10.000000	1864.434126	0.049265	1.263289	0.060115	7.425333	0.021077
Aurora B	155	167	RMYNYFHDRKRIY		1861.927900	no-P	30.000002	1864.654413	0.034790	1.483576	0.048961	7.446466	0.017724
Aurora B	155	167	RMYNYFHDRKRIY		1861.927900	no-P	90.000008	1864.807370	0.068315	1.636533	0.076510	7.456813	0.014899
Aurora B	155	168	RMYNYFHDRKRIYL		1975.011900	all-P	0.000000	1976.396149	0.083097	0.000000	0.000000	8.240617	0.006113
Aurora B	155	168	RMYNYFHDRKRIYL		1975.011900	all-P	3.000000	1977.475851	0.078001	1.079701	0.113970	8.225031	0.028744
Aurora B	155	168	RMYNYFHDRKRIYL		1975.011900	all-P	10.000000	1977.538329	0.062177	1.142180	0.103783	8.209826	0.024071
Aurora B	155	168	RMYNYFHDRKRIYL		1975.011900	all-P	30.000002	1977.694727	0.042747	1.298578	0.093447	8.237770	0.019579
Aurora B	155	168	RMYNYFHDRKRIYL		1975.011900	all-P	90.000008	1977.912107	0.062888	1.515958	0.104211	8.256258	0.019586
Aurora B	155	168	RMYNYFHDRKRIYL		1975.011900	no-P	0.000000	1976.396149	0.083097	0.000000	0.000000	8.240617	0.006113
Aurora B	155	168	RMYNYFHDRKRIYL		1975.011900	no-P	3.000000	1977.457226	0.066369	1.061077	0.106348	8.229342	0.025121
Aurora B	155	168	RMYNYFHDRKRIYL		1975.011900	no-P	10.000000	1977.570271	0.036119	1.174121	0.090607	8.218744	0.024722
Aurora B	155	168	RMYNYFHDRKRIYL		1975.011900	no-P	30.000002	1977.755586	0.081375	1.359437	0.116305	8.243971	0.009692
Aurora B	155	168	RMYNYFHDRKRIYL		1975.011900	no-P	90.000008	1978.014121	0.078913	1.617972	0.114596	8.262335	0.007811
Aurora B	157	160	YNYF		606.255800	all-P	0.000000	606.600228	0.021671	0.000000	0.000000	9.253453	0.003346
Aurora B	157	160	YNYF		606.255800	all-P	3.000000	606.644846	0.036251	0.044618	0.042234	9.238853	0.021183
Aurora B	157	160	YNYF		606.255800	all-P	10.000000	606.701390	0.025362	0.101162	0.033359	9.227568	0.021413
Aurora B	157	160	YNYF		606.255800	all-P	30.000002	606.705970	0.023856	0.105742	0.032230	9.256130	0.006682
Aurora B	157	160	YNYF		606.255800	all-P	90.000008	606.727671	0.025798	0.127443	0.033692	9.256192	0.011925
Aurora B	157	160	YNYF		606.255800	no-P	0.000000	606.600228	0.021671	0.000000	0.000000	9.253453	0.003346
Aurora B	157	160	YNYF		606.255800	no-P	3.000000	606.634003	0.014683	0.033775	0.026176	9.247246	0.014716
Aurora B	157	160	YNYF		606.255800	no-P	10.000000	606.698712	0.016022	0.098484	0.026950	9.240842	0.019755
Aurora B	157	160	YNYF		606.255800	no-P	30.000002	606.748380	0.015308	0.148152	0.026532	9.256016	0.008657
Aurora B	157	160	YNYF		606.255800	no-P	90.000008	606.797185	0.008421	0.196957	0.023249	9.264808	0.003696
Aurora B	157	167	YNYFHDRKRIY		1574.786300	all-P	0.000000	1576.047088	0.034351	0.000000	0.000000	7.262854	0.005664
Aurora B	157	167	YNYFHDRKRIY		1574.786300	all-P	3.000000	1577.089668	0.067959	1.042580	0.076147	7.252718	0.023389
Aurora B	157	167	YNYFHDRKRIY		1574.786300	all-P	10.000000	1577.137517	0.039253	1.090429	0.052161	7.245228	0.024132
Aurora B	157	167	YNYFHDRKRIY		1574.786300	all-P	30.000002	1577.321148	0.021192	1.274060	0.040362	7.267531	0.016810
Aurora B	157	167	YNYFHDRKRIY		1574.786300	all-P	90.000008	1577.528538	0.046777	1.481450	0.058035	7.268494	0.020565
Aurora B	157	167	YNYFHDRKRIY		1574.786300	no-P	0.000000	1576.047088	0.034351	0.000000	0.000000	7.262854	0.005664
Aurora B	157	167	YNYFHDRKRIY		1574.786300	no-P	3.000000	1577.090234	0.077906	1.043146	0.085143	7.259990	0.016065
Aurora B	157	167	YNYFHDRKRIY		1574.786300	no-P	10.000000	1577.171762	0.027358	1.124674	0.043914	7.253851	0.024779
Aurora B	157	167	YNYFHDRKRIY		1574.786300	no-P	30.000002	1577.362322	0.036505	1.315234	0.050126	7.260401	0.010607
Aurora B	157	167	YNYFHDRKRIY		1574.786300	no-P	90.000008	1577.664690	0.013145	1.617602	0.036780	7.278369	0.006674
Aurora B	157	168	YNYFHDRKRIYL		1687.870300	all-P	0.000000	1689.162851	0.032890	0.000000	0.000000	8.196806	0.024292
Aurora B	157	168	YNYFHDRKRIYL		1687.870300	all-P	3.000000	1690.235279	0.056123	1.072428	0.065050	8.194752	0.027590
Aurora B	157	168	YNYFHDRKRIYL		1687.870300	all-P	10.000000	1690.315739	0.038376	1.152888	0.050542	8.180113	0.018911
Aurora B	157	168	YNYFHDRKRIYL		1687.870300	all-P	30.000002	1690.459370	0.038584	1.296519	0.050700	8.216278	0.014268
Aurora B	157	168	YNYFHDRKRIYL		1687.870300	all-P	90.000008	1690.688354	0.037343	1.525503	0.049762	8.241664	0.016340
Aurora B	157	168	YNYFHDRKRIYL		1687.870300	no-P	0.000000	1689.162851	0.032890	0.000000	0.000000	8.196806	0.024292
Aurora B	157	168	YNYFHDRKRIYL		1687.870300	no-P	3.000000	1690.247362	0.051543	1.084511	0.061143	8.201445	0.019756
Aurora B	157	168	YNYFHDRKRIYL		1687.870300	no-P	10.000000	1690.348165	0.034761	1.185314	0.047855	8.198298	0.023581
Aurora B	157	168	YNYFHDRKRIYL		1687.870300	no-P	30.000002	1690.534500	0.021464	1.371649	0.039274	8.209965	0.021186
Aurora B	157	168	YNYFHDRKRIYL		1687.870300	no-P	90.000008	1690.827007	0.003769	1.664156	0.033106	8.223170	0.019188
Aurora B	157	169	YNYFHDRKRIYLM		1818.910800	all-P	0.000000	1820.331959	0.126719	0.000000	0.000000	8.547783	0.005179
Aurora B	157	169	YNYFHDRKRIYLM		1818.910800	all-P	3.000000	1821.519946	0.078160	1.187988	0.148884	8.542137	0.032365
Aurora B	157	169	YNYFHDRKRIYLM		1818.910800	all-P	10.000000	1821.616166	0.099676	1.284207	0.161224	8.526505	0.022265
Aurora B	157	169	YNYFHDRKRIYLM		1818.910800	all-P	30.000002	1821.758346	0.088130	1.426388	0.154352	8.561489	0.015167
Aurora B	157	169	YNYFHDRKRIYLM		1818.910800	all-P	90.000008	1822.013171	0.106164	1.681212	0.165313	8.575414	0.018737
Aurora B	157	169	YNYFHDRKRIYLM		1818.910800	no-P	0.000000	1820.331959	0.126719	0.000000	0.000000	8.547783	0.005179
Aurora B	157	169	YNYFHDRKRIYLM		1818.910800	no-P	3.000000	1821.517226	0.091279	1.185267	0.156172	8.548093	0.020672
Aurora B	157	169	YNYFHDRKRIYLM		1818.910800	no-P	10.000000	1821.656573	0.099582	1.324614	0.161165	8.538825	0.024831
Aurora B	157	169	YNYFHDRKRIYLM		1818.910800	no-P	30.000002	1821.830894	0.103063	1.498936	0.163339	8.560015	0.014324
Aurora B	157	169	YNYFHDRKRIYLM		1818.910800	no-P	90.000008	1822.091437	0.055809	1.759479	0.138464	8.566015	0.014396
Aurora B	157	170	YNYFHDRKRIYLML		1931.994900	all-P	0.000000	1933.287557	0.006936	0.000000	0.000000	9.504191	0.003209
Aurora B	157	170	YNYFHDRKRIYLML		1931.994900	all-P	3.000000	1934.174100	0.046186	0.886544	0.046704	9.495461	0.028943
Aurora B	157	170	YNYFHDRKRIYLML		1931.994900	all-P	10.000000	1934.129000	0.032479	0.841443	0.033211	9.482279	0.022407
Aurora B	157	170	YNYFHDRKRIYLML		1931.994900	all-P	30.000002	1934.305388	0.003757	1.017831	0.007889	9.509244	0.002500
Aurora B	157	170	YNYFHDRKRIYLML		1931.994900	all-P	90.000008	1934.525546	0.019913	1.237989	0.021086	9.522840	0.023749
Aurora B	157	170	YNYFHDRKRIYLML		1931.994900	no-P	0.000000	1933.287557	0.006936	0.000000	0.000000	9.504191	0.003209
Aurora B	157	170	YNYFHDRKRIYLML		1931.994900	no-P	3.000000	1934.180396	0.067572	0.892840	0.067927	9.502700	0.024612
Aurora B	157	170	YNYFHDRKRIYLML		1931.994900	no-P	10.000000	1934.213263	0.005109	0.925707	0.008615	9.488671	0.024057
Aurora B	157	170	YNYFHDRKRIYLML		1931.994900	no-P	30.000002	1934.395593	0.034648	1.108036	0.035336	9.520753	0.020952
Aurora B	157	170	YNYFHDRKRIYLML		1931.994900	no-P	90.000008	1934.673566	0.042732	1.386009	0.043292	9.518862	0.017966
Aurora B	169	172	MLEF		539.253400	all-P	0.000000	539.560623	0.030890	0.000000	0.000000	9.923004	0.005116
Aurora B	169	172	MLEF		539.253400	all-P	3.000000	539.633388	0.013524	0.072764	0.033721	9.909292	0.018756
Aurora B	169	172	MLEF		539.253400	all-P	10.000000	539.650063	0.002571	0.089439	0.030997	9.902057	0.024947
Aurora B	169	172	MLEF		539.253400	all-P	30.000002	539.642838	0.027336	0.082215	0.041249	9.933070	0.008369
Aurora B	169	172	MLEF		539.253400	all-P	90.000008	539.682508	0.026651	0.121884	0.040798	9.937531	0.016389
Aurora B	169	172	MLEF		539.253400	no-P	0.000000	539.560623	0.030890	0.000000	0.000000	9.923004	0.005116
Aurora B	169	172	MLEF		539.253400	no-P	3.000000	539.616175	0.030367	0.055551	0.043317	9.920203	0.021585
Aurora B	169	172	MLEF		539.253400	no-P	10.000000	539.655274	0.008147	0.094650	0.031946	9.913846	0.023424
Aurora B	169	172	MLEF		539.253400	no-P	30.000002	539.692294	0.035903	0.131671	0.047363	9.929502	0.014337
Aurora B	169	172	MLEF		539.253400	no-P	90.000008	539.718398	0.028793	0.157775	0.042228	9.932895	0.009301
Aurora B	170	178	LEFAPRGEL		1031.552000	all-P	0.000000	1032.428138	0.110364	0.000000	0.000000	8.502057	0.006225
Aurora B	170	178	LEFAPRGEL		1031.552000	all-P	3.000000	1033.365024	0.053465	0.936886	0.122633	8.499602	0.023549
Aurora B	170	178	LEFAPRGEL		1031.552000	all-P	10.000000	1033.820090	0.033828	1.391952	0.115432	8.473635	0.015682
Aurora B	170	178	LEFAPRGEL		1031.552000	all-P	30.000002	1034.438673	0.034282	2.010535	0.115566	8.509855	0.008183
Aurora B	170	178	LEFAPRGEL		1031.552000	all-P	90.000008	1035.053604	0.028259	2.625466	0.113924	8.508347	0.014393
Aurora B	170	178	LEFAPRGEL		1031.552000	no-P	0.000000	1032.428138	0.110364	0.000000	0.000000	8.502057	0.006225
Aurora B	170	178	LEFAPRGEL		1031.552000	no-P	3.000000	1033.512599	0.062304	1.084462	0.126736	8.498357	0.011496
Aurora B	170	178	LEFAPRGEL		1031.552000	no-P	10.000000	1033.980642	0.056334	1.552504	0.123910	8.491794	0.020633
Aurora B	170	178	LEFAPRGEL		1031.552000	no-P	30.000002	1034.607821	0.034415	2.179684	0.115605	8.508183	0.013172
Aurora B	170	178	LEFAPRGEL		1031.552000	no-P	90.000008	1035.054787	0.028659	2.626649	0.114024	8.512025	0.008877
Aurora B	171	178	EFAPRGEL		918.468000	all-P	0.000000	919.335527	0.246828	0.000000	0.000000	7.570904	0.028989
Aurora B	171	178	EFAPRGEL		918.468000	all-P	3.000000	920.276898	0.189095	0.941372	0.310936	7.568870	0.016662
Aurora B	171	178	EFAPRGEL		918.468000	all-P	10.000000	920.700849	0.149909	1.365322	0.288785	7.553763	0.012709
Aurora B	171	178	EFAPRGEL		918.468000	all-P	30.000002	921.242710	0.100029	1.907183	0.266327	7.578977	0.012454
Aurora B	171	178	EFAPRGEL		918.468000	all-P	90.000008	921.782152	0.079191	2.446626	0.259220	7.583088	0.013866
Aurora B	171	178	EFAPRGEL		918.468000	no-P	0.000000	919.335527	0.246828	0.000000	0.000000	7.570904	0.028989
Aurora B	171	178	EFAPRGEL		918.468000	no-P	3.000000	920.449251	0.184932	1.113724	0.308421	7.571387	0.020403
Aurora B	171	178	EFAPRGEL		918.468000	no-P	10.000000	920.844712	0.137684	1.509186	0.282632	7.564108	0.011284
Aurora B	171	178	EFAPRGEL		918.468000	no-P	30.000002	921.338790	0.091606	2.003263	0.263279	7.577346	0.022500
Aurora B	171	178	EFAPRGEL		918.468000	no-P	90.000008	921.754832	0.077180	2.419306	0.258613	7.580564	0.012157
Aurora B	172	178	FAPRGEL		789.425400	all-P	0.000000	790.117729	0.142642	0.000000	0.000000	7.128434	0.005522
Aurora B	172	178	FAPRGEL		789.425400	all-P	3.000000	791.050067	0.054354	0.932339	0.152647	7.122990	0.020482
Aurora B	172	178	FAPRGEL		789.425400	all-P	10.000000	791.390340	0.056857	1.272611	0.153556	7.108526	0.013904
Aurora B	172	178	FAPRGEL		789.425400	all-P	30.000002	791.872327	0.092660	1.754598	0.170096	7.127075	0.016713
Aurora B	172	178	FAPRGEL		789.425400	all-P	90.000008	792.339157	0.046248	2.221428	0.149952	7.137116	0.025392
Aurora B	172	178	FAPRGEL		789.425400	no-P	0.000000	790.117729	0.142642	0.000000	0.000000	7.128434	0.005522
Aurora B	172	178	FAPRGEL		789.425400	no-P	3.000000	791.133758	0.074480	1.016029	0.160916	7.118503	0.010135
Aurora B	172	178	FAPRGEL		789.425400	no-P	10.000000	791.465442	0.043439	1.347713	0.149109	7.121387	0.016109
Aurora B	172	178	FAPRGEL		789.425400	no-P	30.000002	791.957360	0.081862	1.839632	0.164463	7.137862	0.010086
Aurora B	172	178	FAPRGEL		789.425400	no-P	90.000008	792.379398	0.048997	2.261669	0.150822	7.135657	0.003426
Aurora B	173	178	APRGEL		642.357000	all-P	0.000000	642.651992	0.058527	0.000000	0.000000	5.961924	0.010193
Aurora B	173	178	APRGEL		642.357000	all-P	3.000000	643.605299	0.166360	0.953307	0.176355	5.953194	0.021267
Aurora B	173	178	APRGEL		642.357000	all-P	10.000000	643.846199	0.125725	1.194208	0.138680	5.937471	0.017320
Aurora B	173	178	APRGEL		642.357000	all-P	30.000002	644.305307	0.184118	1.653316	0.193196	5.944058	0.011891
Aurora B	173	178	APRGEL		642.357000	all-P	90.000008	644.733749	0.199760	2.081758	0.208157	5.965482	0.022888
Aurora B	173	178	APRGEL		642.357000	no-P	0.000000	642.651992	0.058527	0.000000	0.000000	5.961924	0.010193
Aurora B	173	178	APRGEL		642.357000	no-P	3.000000	643.607545	0.167624	0.955553	0.177548	5.950971	0.014734
Aurora B	173	178	APRGEL		642.357000	no-P	10.000000	643.957968	0.096129	1.305976	0.112544	5.952463	0.011923
Aurora B	173	178	APRGEL		642.357000	no-P	30.000002	644.317444	0.203644	1.665452	0.211887	5.959674	0.009170
Aurora B	173	178	APRGEL		642.357000	no-P	90.000008	644.746894	0.169158	2.094903	0.178997	5.964273	0.013651
Aurora B	174	178	PRGEL		571.319800	all-P	0.000000	571.789451	0.020097	0.000000	0.000000	7.572445	0.004401
Aurora B	174	178	PRGEL		571.319800	all-P	3.000000	572.351902	0.019748	0.562451	0.028176	7.569556	0.015777
Aurora B	174	178	PRGEL		571.319800	all-P	10.000000	572.586995	0.061630	0.797545	0.064824	7.559601	0.015808
Aurora B	174	178	PRGEL		571.319800	all-P	30.000002	572.959425	0.019487	1.169974	0.027994	7.578824	0.007745
Aurora B	174	178	PRGEL		571.319800	all-P	90.000008	573.270417	0.035021	1.480967	0.040377	7.583092	0.012893
Aurora B	174	178	PRGEL		571.319800	no-P	0.000000	571.789451	0.020097	0.000000	0.000000	7.572445	0.004401
Aurora B	174	178	PRGEL		571.319800	no-P	3.000000	572.451944	0.028680	0.662493	0.035020	7.571980	0.013750
Aurora B	174	178	PRGEL		571.319800	no-P	10.000000	572.662471	0.047426	0.873021	0.051508	7.566054	0.009780
Aurora B	174	178	PRGEL		571.319800	no-P	30.000002	573.030232	0.012119	1.240781	0.023468	7.579855	0.021103
Aurora B	174	178	PRGEL		571.319800	no-P	90.000008	573.290652	0.030701	1.501201	0.036694	7.582470	0.003328
Aurora B	179	188	YKELQKHGRF		1305.706200	all-P	0.000000	1306.982005	0.146833	0.000000	0.000000	6.062465	0.009519
Aurora B	179	188	YKELQKHGRF		1305.706200	all-P	3.000000	1308.409624	0.053852	1.427619	0.156396	6.036732	0.026971
Aurora B	179	188	YKELQKHGRF		1305.706200	all-P	10.000000	1309.148912	0.077054	2.166907	0.165822	6.019559	0.019066
Aurora B	179	188	YKELQKHGRF		1305.706200	all-P	30.000002	1309.871486	0.071364	2.889481	0.163256	6.045498	0.015598
Aurora B	179	188	YKELQKHGRF		1305.706200	all-P	90.000008	1310.324354	0.048161	3.342349	0.154529	6.052448	0.015653
Aurora B	179	188	YKELQKHGRF		1305.706200	no-P	0.000000	1306.982005	0.146833	0.000000	0.000000	6.062465	0.009519
Aurora B	179	188	YKELQKHGRF		1305.706200	no-P	3.000000	1308.536629	0.042519	1.554624	0.152865	6.043149	0.014476
Aurora B	179	188	YKELQKHGRF		1305.706200	no-P	10.000000	1309.091855	0.055741	2.109850	0.157057	6.021120	0.017275
Aurora B	179	188	YKELQKHGRF		1305.706200	no-P	30.000002	1309.724109	0.039350	2.742104	0.152014	6.041110	0.015180
Aurora B	179	188	YKELQKHGRF		1305.706200	no-P	90.000008	1310.263509	0.037891	3.281504	0.151643	6.045862	0.013810
Aurora B	179	195	YKELQKHGRFDEQRSAT		2093.052300	all-P	0.000000	2094.402471	0.033497	0.000000	0.000000	5.526709	0.011509
Aurora B	179	195	YKELQKHGRFDEQRSAT		2093.052300	all-P	3.000000	2096.706488	0.155215	2.304017	0.158788	5.521834	0.024085
Aurora B	179	195	YKELQKHGRFDEQRSAT		2093.052300	all-P	10.000000	2097.735647	0.114281	3.333175	0.119089	5.508029	0.024118
Aurora B	179	195	YKELQKHGRFDEQRSAT		2093.052300	all-P	30.000002	2098.828939	0.271994	4.426468	0.274048	5.528865	0.006101
Aurora B	179	195	YKELQKHGRFDEQRSAT		2093.052300	all-P	90.000008	2099.355905	0.196785	4.953433	0.199615	5.528564	0.021438
Aurora B	179	195	YKELQKHGRFDEQRSAT		2093.052300	no-P	0.000000	2094.402471	0.033497	0.000000	0.000000	5.526709	0.011509
Aurora B	179	195	YKELQKHGRFDEQRSAT		2093.052300	no-P	3.000000	2097.178409	0.226162	2.775938	0.228629	5.521511	0.019506
Aurora B	179	195	YKELQKHGRFDEQRSAT		2093.052300	no-P	10.000000	2097.933188	0.211465	3.530717	0.214102	5.517546	0.016277
Aurora B	179	195	YKELQKHGRFDEQRSAT		2093.052300	no-P	30.000002	2098.870911	0.266304	4.468440	0.268402	5.529905	0.017828
Aurora B	179	195	YKELQKHGRFDEQRSAT		2093.052300	no-P	90.000008	2099.670332	0.456394	5.267861	0.457622	5.534434	0.014637
Aurora B	179	196	YKELQKHGRFDEQRSATF		2240.120700	all-P	0.000000	2241.651687	0.101086	0.000000	0.000000	6.745943	0.003882
Aurora B	179	196	YKELQKHGRFDEQRSATF		2240.120700	all-P	3.000000	2243.945462	0.048573	2.293775	0.112151	6.737931	0.022802
Aurora B	179	196	YKELQKHGRFDEQRSATF		2240.120700	all-P	10.000000	2244.913038	0.088369	3.261351	0.134267	6.728326	0.024148
Aurora B	179	196	YKELQKHGRFDEQRSATF		2240.120700	all-P	30.000002	2245.763796	0.064013	4.112109	0.119650	6.745386	0.004418
Aurora B	179	196	YKELQKHGRFDEQRSATF		2240.120700	all-P	90.000008	2246.366419	0.109047	4.714732	0.148694	6.757812	0.020449
Aurora B	179	196	YKELQKHGRFDEQRSATF		2240.120700	no-P	0.000000	2241.651687	0.101086	0.000000	0.000000	6.745943	0.003882
Aurora B	179	196	YKELQKHGRFDEQRSATF		2240.120700	no-P	3.000000	2244.406252	0.144362	2.754565	0.176235	6.741888	0.011914
Aurora B	179	196	YKELQKHGRFDEQRSATF		2240.120700	no-P	10.000000	2245.136256	0.170198	3.484569	0.197954	6.730902	0.018689
Aurora B	179	196	YKELQKHGRFDEQRSATF		2240.120700	no-P	30.000002	2245.929937	0.015215	4.278250	0.102225	6.742023	0.001142
Aurora B	179	196	YKELQKHGRFDEQRSATF		2240.120700	no-P	90.000008	2246.523688	0.310606	4.872001	0.326641	6.764138	0.003870
Aurora B	182	188	LQKHGRF		885.505300	all-P	0.000000	885.967805	0.051385	0.000000	0.000000	6.045826	0.004861
Aurora B	182	188	LQKHGRF		885.505300	all-P	3.000000	887.030350	0.096963	1.062545	0.109737	6.032019	0.023133
Aurora B	182	188	LQKHGRF		885.505300	all-P	10.000000	887.614165	0.099392	1.646359	0.111889	6.019184	0.025970
Aurora B	182	188	LQKHGRF		885.505300	all-P	30.000002	888.105770	0.156813	2.137965	0.165018	6.046512	0.012741
Aurora B	182	188	LQKHGRF		885.505300	all-P	90.000008	888.562579	0.179091	2.594773	0.186317	6.051793	0.015892
Aurora B	182	188	LQKHGRF		885.505300	no-P	0.000000	885.967805	0.051385	0.000000	0.000000	6.045826	0.004861
Aurora B	182	188	LQKHGRF		885.505300	no-P	3.000000	887.153361	0.059892	1.185556	0.078914	6.036401	0.014021
Aurora B	182	188	LQKHGRF		885.505300	no-P	10.000000	887.560970	0.137982	1.593164	0.147240	6.026750	0.020986
Aurora B	182	188	LQKHGRF		885.505300	no-P	30.000002	888.127421	0.107242	2.159616	0.118917	6.038006	0.017180
Aurora B	182	188	LQKHGRF		885.505300	no-P	90.000008	888.547419	0.173456	2.579614	0.180907	6.045615	0.009190
Aurora B	183	188	QKHGRF		772.421300	all-P	0.000000	772.770613	0.012839	0.000000	0.000000	6.048028	0.004312
Aurora B	183	188	QKHGRF		772.421300	all-P	3.000000	773.896962	0.033509	1.126349	0.035884	6.028062	0.020506
Aurora B	183	188	QKHGRF		772.421300	all-P	10.000000	774.479594	0.044981	1.708981	0.046778	6.018377	0.022492
Aurora B	183	188	QKHGRF		772.421300	all-P	30.000002	775.034313	0.034761	2.263700	0.037056	6.039255	0.010693
Aurora B	183	188	QKHGRF		772.421300	all-P	90.000008	775.329876	0.015514	2.559263	0.020138	6.048437	0.017759
Aurora B	183	188	QKHGRF		772.421300	no-P	0.000000	772.770613	0.012839	0.000000	0.000000	6.048028	0.004312
Aurora B	183	188	QKHGRF		772.421300	no-P	3.000000	773.982381	0.045909	1.211769	0.047670	6.035818	0.013344
Aurora B	183	188	QKHGRF		772.421300	no-P	10.000000	774.362078	0.045085	1.591466	0.046878	6.023425	0.017771
Aurora B	183	188	QKHGRF		772.421300	no-P	30.000002	774.865286	0.069840	2.094674	0.071011	6.039108	0.013838
Aurora B	183	188	QKHGRF		772.421300	no-P	90.000008	775.404398	0.047420	2.633786	0.049127	6.049380	0.006732
Aurora B	185	188	HGRF		516.267700	all-P	0.000000	516.505628	0.005868	0.000000	0.000000	6.049988	0.005182
Aurora B	185	188	HGRF		516.267700	all-P	3.000000	517.199041	0.039219	0.693412	0.039655	6.032752	0.020629
Aurora B	185	188	HGRF		516.267700	all-P	10.000000	517.586585	0.038216	1.080957	0.038664	6.015989	0.021750
Aurora B	185	188	HGRF		516.267700	all-P	30.000002	517.947383	0.036298	1.441755	0.036770	6.041993	0.010537
Aurora B	185	188	HGRF		516.267700	all-P	90.000008	518.077910	0.033909	1.572282	0.034413	6.050019	0.016491
Aurora B	185	188	HGRF		516.267700	no-P	0.000000	516.505628	0.005868	0.000000	0.000000	6.049988	0.005182
Aurora B	185	188	HGRF		516.267700	no-P	3.000000	517.224195	0.043639	0.718567	0.044032	6.037024	0.014609
Aurora B	185	188	HGRF		516.267700	no-P	10.000000	517.550603	0.047566	1.044975	0.047927	6.024770	0.018034
Aurora B	185	188	HGRF		516.267700	no-P	30.000002	517.800223	0.033421	1.294595	0.033932	6.036963	0.015301
Aurora B	185	188	HGRF		516.267700	no-P	90.000008	518.125295	0.028254	1.619667	0.028856	6.048830	0.006168
Aurora B	189	195	DEQRSAT		806.363900	all-P	0.000000	806.893016	0.121704	0.000000	0.000000	2.594243	0.004393
Aurora B	189	195	DEQRSAT		806.363900	all-P	3.000000	808.197275	0.049514	1.304259	0.131391	2.591597	0.007228
Aurora B	189	195	DEQRSAT		806.363900	all-P	10.000000	808.516894	0.040279	1.623878	0.128196	2.589982	0.007324
Aurora B	189	195	DEQRSAT		806.363900	all-P	30.000002	808.629052	0.073791	1.736036	0.142327	2.597376	0.003033
Aurora B	189	195	DEQRSAT		806.363900	all-P	90.000008	808.653114	0.033362	1.760098	0.126194	2.594409	0.006826
Aurora B	189	195	DEQRSAT		806.363900	no-P	0.000000	806.893016	0.121704	0.000000	0.000000	2.594243	0.004393
Aurora B	189	195	DEQRSAT		806.363900	no-P	3.000000	808.281390	0.047377	1.388373	0.130600	2.590783	0.007692
Aurora B	189	195	DEQRSAT		806.363900	no-P	10.000000	808.564926	0.057148	1.671910	0.134453	2.588021	0.002727
Aurora B	189	195	DEQRSAT		806.363900	no-P	30.000002	808.641764	0.034375	1.748748	0.126465	2.596158	0.004353
Aurora B	189	195	DEQRSAT		806.363900	no-P	90.000008	808.634747	0.022393	1.741731	0.123747	2.598711	0.004143
Aurora B	189	196	DEQRSATF		953.432300	all-P	0.000000	954.354815	0.212117	0.000000	0.000000	6.533177	0.014189
Aurora B	189	196	DEQRSATF		953.432300	all-P	3.000000	955.456907	0.103677	1.102092	0.236098	6.544712	0.014549
Aurora B	189	196	DEQRSATF		953.432300	all-P	10.000000	955.796765	0.075742	1.441950	0.225234	6.531526	0.020534
Aurora B	189	196	DEQRSATF		953.432300	all-P	30.000002	955.885515	0.102561	1.530700	0.235611	6.548437	0.013631
Aurora B	189	196	DEQRSATF		953.432300	all-P	90.000008	955.911212	0.096878	1.556396	0.233193	6.551595	0.020670
Aurora B	189	196	DEQRSATF		953.432300	no-P	0.000000	954.354815	0.212117	0.000000	0.000000	6.533177	0.014189
Aurora B	189	196	DEQRSATF		953.432300	no-P	3.000000	955.613538	0.108567	1.258723	0.238286	6.542404	0.009400
Aurora B	189	196	DEQRSATF		953.432300	no-P	10.000000	955.863454	0.100039	1.508639	0.234524	6.548178	0.013477
Aurora B	189	196	DEQRSATF		953.432300	no-P	30.000002	955.956638	0.099961	1.601823	0.234490	6.552089	0.016502
Aurora B	189	196	DEQRSATF		953.432300	no-P	90.000008	955.989672	0.086511	1.634857	0.229080	6.560534	0.007567
Aurora B	189	197	DEQRSATFM		1084.472800	all-P	0.000000	1084.973624	0.033031	0.000000	0.000000	7.674597	0.007330
Aurora B	189	197	DEQRSATFM		1084.472800	all-P	3.000000	1086.204726	0.118293	1.231102	0.122818	7.666920	0.018798
Aurora B	189	197	DEQRSATFM		1084.472800	all-P	10.000000	1086.479610	0.053425	1.505986	0.062811	7.666854	0.020089
Aurora B	189	197	DEQRSATFM		1084.472800	all-P	30.000002	1086.536455	0.030270	1.562831	0.044803	7.686981	0.006089
Aurora B	189	197	DEQRSATFM		1084.472800	all-P	90.000008	1086.555581	0.052338	1.581957	0.061889	7.687479	0.017205
Aurora B	189	197	DEQRSATFM		1084.472800	no-P	0.000000	1084.973624	0.033031	0.000000	0.000000	7.674597	0.007330
Aurora B	189	197	DEQRSATFM		1084.472800	no-P	3.000000	1086.316201	0.043146	1.342577	0.054338	7.677075	0.010774
Aurora B	189	197	DEQRSATFM		1084.472800	no-P	10.000000	1086.555306	0.039560	1.581682	0.051537	7.666413	0.019953
Aurora B	189	197	DEQRSATFM		1084.472800	no-P	30.000002	1086.629386	0.087046	1.655761	0.093102	7.684146	0.015263
Aurora B	189	197	DEQRSATFM		1084.472800	no-P	90.000008	1086.603506	0.038766	1.629882	0.050930	7.697973	0.001269
Aurora B	191	196	QRSATF		709.362800	all-P	0.000000	709.699054	0.005291	0.000000	0.000000	6.555849	0.004500
Aurora B	191	196	QRSATF		709.362800	all-P	3.000000	710.626405	0.017794	0.927351	0.018564	6.549577	0.015028
Aurora B	191	196	QRSATF		709.362800	all-P	10.000000	710.922584	0.026826	1.223531	0.027343	6.543079	0.014964
Aurora B	191	196	QRSATF		709.362800	all-P	30.000002	710.954255	0.024942	1.255201	0.025497	6.559222	0.010594
Aurora B	191	196	QRSATF		709.362800	all-P	90.000008	710.916607	0.023624	1.217554	0.024209	6.560267	0.015942
Aurora B	191	196	QRSATF		709.362800	no-P	0.000000	709.699054	0.005291	0.000000	0.000000	6.555849	0.004500
Aurora B	191	196	QRSATF		709.362800	no-P	3.000000	710.693132	0.033072	0.994078	0.033492	6.548742	0.010538
Aurora B	191	196	QRSATF		709.362800	no-P	10.000000	710.941832	0.040219	1.242778	0.040565	6.550538	0.013980
Aurora B	191	196	QRSATF		709.362800	no-P	30.000002	710.913194	0.083045	1.214140	0.083214	6.555213	0.009388
Aurora B	191	196	QRSATF		709.362800	no-P	90.000008	710.945242	0.023438	1.246189	0.024028	6.562066	0.002132
Aurora B	196	199	FMEE		555.211900	all-P	0.000000	555.710303	0.016799	0.000000	0.000000	6.636238	0.003880
Aurora B	196	199	FMEE		555.211900	all-P	3.000000	555.741141	0.027609	0.030838	0.032318	6.618424	0.012744
Aurora B	196	199	FMEE		555.211900	all-P	10.000000	555.763778	0.012846	0.053476	0.021148	6.613318	0.017210
Aurora B	196	199	FMEE		555.211900	all-P	30.000002	555.790149	0.020746	0.079846	0.026694	6.619908	0.015285
Aurora B	196	199	FMEE		555.211900	all-P	90.000008	555.792571	0.031385	0.082268	0.035598	6.622197	0.012415
Aurora B	196	199	FMEE		555.211900	no-P	0.000000	555.710303	0.016799	0.000000	0.000000	6.636238	0.003880
Aurora B	196	199	FMEE		555.211900	no-P	3.000000	555.730550	0.020059	0.020247	0.026164	6.625207	0.011463
Aurora B	196	199	FMEE		555.211900	no-P	10.000000	555.782275	0.019397	0.071972	0.025660	6.613066	0.010466
Aurora B	196	199	FMEE		555.211900	no-P	30.000002	555.798020	0.022218	0.087718	0.027854	6.614293	0.013946
Aurora B	196	199	FMEE		555.211900	no-P	90.000008	555.793494	0.030290	0.083191	0.034637	6.625342	0.009261
Aurora B	196	200	FMEEL		668.296000	all-P	0.000000	668.780801	0.032628	0.000000	0.000000	9.009808	0.004407
Aurora B	196	200	FMEEL		668.296000	all-P	3.000000	668.810709	0.042671	0.029908	0.053717	9.010148	0.021851
Aurora B	196	200	FMEEL		668.296000	all-P	10.000000	668.859096	0.014083	0.078294	0.035538	8.997205	0.017924
Aurora B	196	200	FMEEL		668.296000	all-P	30.000002	668.843454	0.018972	0.062652	0.037743	9.022688	0.009003
Aurora B	196	200	FMEEL		668.296000	all-P	90.000008	668.833832	0.009704	0.053031	0.034041	9.032816	0.016426
Aurora B	196	200	FMEEL		668.296000	no-P	0.000000	668.780801	0.032628	0.000000	0.000000	9.009808	0.004407
Aurora B	196	200	FMEEL		668.296000	no-P	3.000000	668.818515	0.018823	0.037714	0.037669	9.015408	0.019513
Aurora B	196	200	FMEEL		668.296000	no-P	10.000000	668.854385	0.011535	0.073584	0.034607	9.009975	0.023244
Aurora B	196	200	FMEEL		668.296000	no-P	30.000002	668.903395	0.006598	0.122594	0.033289	9.025722	0.009502
Aurora B	196	200	FMEEL		668.296000	no-P	90.000008	668.863008	0.020820	0.082206	0.038705	9.034398	0.007458
Aurora B	197	200	MEEL		521.227600	all-P	0.000000	521.780234	0.022454	0.000000	0.000000	7.575601	0.006887
Aurora B	197	200	MEEL		521.227600	all-P	3.000000	521.835097	0.035485	0.054863	0.041992	7.580347	0.013350
Aurora B	197	200	MEEL		521.227600	all-P	10.000000	521.872511	0.023038	0.092278	0.032171	7.574980	0.014488
Aurora B	197	200	MEEL		521.227600	all-P	30.000002	521.917143	0.013165	0.136909	0.026029	7.585038	0.009289
Aurora B	197	200	MEEL		521.227600	all-P	90.000008	521.909898	0.030045	0.129664	0.037509	7.590783	0.012187
Aurora B	197	200	MEEL		521.227600	no-P	0.000000	521.780234	0.022454	0.000000	0.000000	7.575601	0.006887
Aurora B	197	200	MEEL		521.227600	no-P	3.000000	521.826716	0.026932	0.046482	0.035064	7.581940	0.015661
Aurora B	197	200	MEEL		521.227600	no-P	10.000000	521.888384	0.016159	0.108150	0.027664	7.576608	0.009507
Aurora B	197	200	MEEL		521.227600	no-P	30.000002	521.906829	0.024165	0.126595	0.032987	7.588170	0.013022
Aurora B	197	200	MEEL		521.227600	no-P	90.000008	521.909073	0.032364	0.128840	0.039391	7.589643	0.005963
Aurora B	197	201	MEELA		592.264700	all-P	0.000000	592.641226	0.019938	0.000000	0.000000	6.835797	0.001885
Aurora B	197	201	MEELA		592.264700	all-P	3.000000	592.715980	0.038260	0.074753	0.043144	6.823877	0.013596
Aurora B	197	201	MEELA		592.264700	all-P	10.000000	592.741073	0.004187	0.099847	0.020373	6.815623	0.009166
Aurora B	197	201	MEELA		592.264700	all-P	30.000002	592.725810	0.022199	0.084583	0.029838	6.833272	0.012359
Aurora B	197	201	MEELA		592.264700	all-P	90.000008	592.743441	0.012437	0.102215	0.023499	6.836244	0.009887
Aurora B	197	201	MEELA		592.264700	no-P	0.000000	592.641226	0.019938	0.000000	0.000000	6.835797	0.001885
Aurora B	197	201	MEELA		592.264700	no-P	3.000000	592.712930	0.015694	0.071703	0.025374	6.831115	0.010441
Aurora B	197	201	MEELA		592.264700	no-P	10.000000	592.755209	0.018019	0.113983	0.026874	6.823596	0.012705
Aurora B	197	201	MEELA		592.264700	no-P	30.000002	592.758759	0.043988	0.117533	0.048296	6.831399	0.009726
Aurora B	197	201	MEELA		592.264700	no-P	90.000008	592.769091	0.019313	0.127864	0.027758	6.842312	0.010755
Aurora B	200	204	LADAL		502.287100	all-P	0.000000	502.999187	0.011880	0.000000	0.000000	7.341581	0.002793
Aurora B	200	204	LADAL		502.287100	all-P	3.000000	503.109782	0.040425	0.110596	0.042135	7.352295	0.016640
Aurora B	200	204	LADAL		502.287100	all-P	10.000000	503.159904	0.011069	0.160717	0.016237	7.343485	0.015714
Aurora B	200	204	LADAL		502.287100	all-P	30.000002	503.138738	0.020657	0.139551	0.023829	7.350201	0.012758
Aurora B	200	204	LADAL		502.287100	all-P	90.000008	503.149754	0.054267	0.150567	0.055552	7.355809	0.017598
Aurora B	200	204	LADAL		502.287100	no-P	0.000000	502.999187	0.011880	0.000000	0.000000	7.341581	0.002793
Aurora B	200	204	LADAL		502.287100	no-P	3.000000	503.139226	0.061557	0.140039	0.062693	7.357556	0.019227
Aurora B	200	204	LADAL		502.287100	no-P	10.000000	503.142665	0.032336	0.143478	0.034449	7.360015	0.016478
Aurora B	200	204	LADAL		502.287100	no-P	30.000002	503.240511	0.035064	0.241324	0.037022	7.369471	0.010080
Aurora B	200	204	LADAL		502.287100	no-P	90.000008	503.245157	0.025913	0.245970	0.028506	7.366280	0.011394
Aurora B	200	223	LADALHYCHERKVIHRDIKPENLL		2883.541000	all-P	0.000000	2885.431480	0.093976	0.000000	0.000000	7.733483	0.006422
Aurora B	200	223	LADALHYCHERKVIHRDIKPENLL		2883.541000	all-P	3.000000	2887.015901	0.017690	1.584421	0.095626	7.723850	0.022771
Aurora B	200	223	LADALHYCHERKVIHRDIKPENLL		2883.541000	all-P	10.000000	2887.856911	0.115463	2.425431	0.148873	7.709631	0.013065
Aurora B	200	223	LADALHYCHERKVIHRDIKPENLL		2883.541000	all-P	30.000002	2889.078400	0.235409	3.646920	0.253474	7.738778	0.017816
Aurora B	200	223	LADALHYCHERKVIHRDIKPENLL		2883.541000	all-P	90.000008	2890.156527	0.267259	4.725047	0.283300	7.745711	0.018697
Aurora B	200	223	LADALHYCHERKVIHRDIKPENLL		2883.541000	no-P	0.000000	2885.431480	0.093976	0.000000	0.000000	7.733483	0.006422
Aurora B	200	223	LADALHYCHERKVIHRDIKPENLL		2883.541000	no-P	3.000000	2888.564264	0.094200	3.132784	0.133060	7.722232	0.014935
Aurora B	200	223	LADALHYCHERKVIHRDIKPENLL		2883.541000	no-P	10.000000	2889.611064	0.196634	4.179584	0.217937	7.712704	0.017713
Aurora B	200	223	LADALHYCHERKVIHRDIKPENLL		2883.541000	no-P	30.000002	2890.486783	0.305939	5.055303	0.320047	7.734668	0.016936
Aurora B	200	223	LADALHYCHERKVIHRDIKPENLL		2883.541000	no-P	90.000008	2891.167921	0.365017	5.736441	0.376920	7.743256	0.013363
Aurora B	205	209	HYCHE		688.250800	all-P	0.000000	688.613163	0.029265	0.000000	0.000000	4.220947	0.003394
Aurora B	205	209	HYCHE		688.250800	all-P	3.000000	688.819405	0.046655	0.206242	0.055073	4.206259	0.005567
Aurora B	205	209	HYCHE		688.250800	all-P	10.000000	688.859148	0.009116	0.245985	0.030652	4.181477	0.019691
Aurora B	205	209	HYCHE		688.250800	all-P	30.000002	689.143612	0.027539	0.530449	0.040185	4.208529	0.013938
Aurora B	205	209	HYCHE		688.250800	all-P	90.000008	689.203484	0.055384	0.590321	0.062640	4.226323	0.003814
Aurora B	205	209	HYCHE		688.250800	no-P	0.000000	688.613163	0.029265	0.000000	0.000000	4.220947	0.003394
Aurora B	205	209	HYCHE		688.250800	no-P	3.000000	688.880009	0.010316	0.266846	0.031030	4.216056	0.012570
Aurora B	205	209	HYCHE		688.250800	no-P	10.000000	689.071764	0.016072	0.458601	0.033388	4.206502	0.009704
Aurora B	205	209	HYCHE		688.250800	no-P	30.000002	689.220278	0.041642	0.607114	0.050897	4.214308	0.009202
Aurora B	205	209	HYCHE		688.250800	no-P	90.000008	689.328009	0.028118	0.714846	0.040584	4.223513	0.010965
Aurora B	205	221	HYCHERKVIHRDIKPEN		2174.103600	all-P	0.000000	2175.907727	0.048451	0.000000	0.000000	5.068169	0.006813
Aurora B	205	221	HYCHERKVIHRDIKPEN		2174.103600	all-P	3.000000	2177.853999	0.040609	1.946272	0.063219	5.058325	0.012417
Aurora B	205	221	HYCHERKVIHRDIKPEN		2174.103600	all-P	10.000000	2178.762699	0.084316	2.854972	0.097245	5.045690	0.013462
Aurora B	205	221	HYCHERKVIHRDIKPEN		2174.103600	all-P	30.000002	2179.861001	0.120098	3.953274	0.129503	5.062690	0.006139
Aurora B	205	221	HYCHERKVIHRDIKPEN		2174.103600	all-P	90.000008	2180.903963	0.122529	4.996236	0.131761	5.069246	0.010737
Aurora B	205	221	HYCHERKVIHRDIKPEN		2174.103600	no-P	0.000000	2175.907727	0.048451	0.000000	0.000000	5.068169	0.006813
Aurora B	205	221	HYCHERKVIHRDIKPEN		2174.103600	no-P	3.000000	2179.098773	0.144033	3.191046	0.151964	5.063041	0.016620
Aurora B	205	221	HYCHERKVIHRDIKPEN		2174.103600	no-P	10.000000	2180.177282	0.148151	4.269555	0.155872	5.048983	0.006106
Aurora B	205	221	HYCHERKVIHRDIKPEN		2174.103600	no-P	30.000002	2181.043176	0.196911	5.135449	0.202785	5.060830	0.014611
Aurora B	205	221	HYCHERKVIHRDIKPEN		2174.103600	no-P	90.000008	2181.595309	0.126946	5.687581	0.135878	5.061902	0.003477
Aurora B	205	222	HYCHERKVIHRDIKPENL		2287.187700	all-P	3.000000	2293.898844	0.000000	NaN	NaN	6.766054	0.000000
Aurora B	205	222	HYCHERKVIHRDIKPENL		2287.187700	all-P	30.000002	2298.437092	0.000000	NaN	NaN	7.583340	0.000000
Aurora B	205	222	HYCHERKVIHRDIKPENL		2287.187700	all-P	90.000008	2303.427869	0.000000	NaN	NaN	7.588562	0.000000
Aurora B	205	222	HYCHERKVIHRDIKPENL		2287.187700	no-P	3.000000	2298.418253	0.000000	NaN	NaN	7.604727	0.000000
Aurora B	205	222	HYCHERKVIHRDIKPENL		2287.187700	no-P	30.000002	2293.710783	0.000000	NaN	NaN	6.787136	0.000000
Aurora B	205	222	HYCHERKVIHRDIKPENL		2287.187700	no-P	90.000008	2293.875425	0.075901	NaN	NaN	6.772768	0.004894
Aurora B	205	223	HYCHERKVIHRDIKPENLL		2400.271700	all-P	0.000000	2402.307445	0.244881	0.000000	0.000000	7.233620	0.017330
Aurora B	205	223	HYCHERKVIHRDIKPENLL		2400.271700	all-P	3.000000	2404.433976	0.117037	2.126532	0.271412	7.231393	0.009331
Aurora B	205	223	HYCHERKVIHRDIKPENLL		2400.271700	all-P	10.000000	2405.425721	0.009303	3.118276	0.245058	7.196212	0.001927
Aurora B	205	223	HYCHERKVIHRDIKPENLL		2400.271700	all-P	30.000002	2406.323703	0.054027	4.016259	0.250770	7.195814	0.014111
Aurora B	205	223	HYCHERKVIHRDIKPENLL		2400.271700	all-P	90.000008	2407.758571	0.667174	5.451126	0.710695	7.204275	0.014102
Aurora B	205	223	HYCHERKVIHRDIKPENLL		2400.271700	no-P	0.000000	2402.307445	0.244881	0.000000	0.000000	7.233620	0.017330
Aurora B	205	223	HYCHERKVIHRDIKPENLL		2400.271700	no-P	3.000000	2405.777519	0.062857	3.470075	0.252819	7.187845	0.024143
Aurora B	205	223	HYCHERKVIHRDIKPENLL		2400.271700	no-P	10.000000	2406.877220	0.150525	4.569775	0.287445	7.183147	0.021675
Aurora B	205	223	HYCHERKVIHRDIKPENLL		2400.271700	no-P	30.000002	2407.339305	0.361891	5.031860	0.436957	7.192442	0.017464
Aurora B	205	223	HYCHERKVIHRDIKPENLL		2400.271700	no-P	90.000008	2408.139706	0.395081	5.832261	0.464818	7.202148	0.021860
Aurora B	205	224	HYCHERKVIHRDIKPENLLM		2531.312200	all-P	0.000000	2533.124193	0.074228	0.000000	0.000000	7.539373	0.004684
Aurora B	205	224	HYCHERKVIHRDIKPENLLM		2531.312200	all-P	3.000000	2534.682905	0.088165	1.558712	0.115251	7.556905	0.029985
Aurora B	205	224	HYCHERKVIHRDIKPENLLM		2531.312200	all-P	10.000000	2535.467778	0.082082	2.343585	0.110667	7.534295	0.023319
Aurora B	205	224	HYCHERKVIHRDIKPENLLM		2531.312200	all-P	30.000002	2536.494443	0.141697	3.370249	0.159962	7.549777	0.003931
Aurora B	205	224	HYCHERKVIHRDIKPENLLM		2531.312200	all-P	90.000008	2537.501198	0.225434	4.377004	0.237340	7.559681	0.017441
Aurora B	205	224	HYCHERKVIHRDIKPENLLM		2531.312200	no-P	0.000000	2533.124193	0.074228	0.000000	0.000000	7.539373	0.004684
Aurora B	205	224	HYCHERKVIHRDIKPENLLM		2531.312200	no-P	3.000000	2535.938432	0.183463	2.814238	0.197910	7.564143	0.029394
Aurora B	205	224	HYCHERKVIHRDIKPENLLM		2531.312200	no-P	10.000000	2536.897425	0.183508	3.773231	0.197952	7.528115	0.021405
Aurora B	205	224	HYCHERKVIHRDIKPENLLM		2531.312200	no-P	30.000002	2537.854746	0.051717	4.730552	0.090468	7.543347	0.000511
Aurora B	205	224	HYCHERKVIHRDIKPENLLM		2531.312200	no-P	90.000008	2538.327939	0.262314	5.203745	0.272614	7.566763	0.013973
Aurora B	207	225	CHERKVIHRDIKPENLLMG		2288.211400	all-P	0.000000	2289.781629	0.303431	0.000000	0.000000	6.137027	0.008909
Aurora B	207	225	CHERKVIHRDIKPENLLMG		2288.211400	all-P	3.000000	2291.580449	0.139559	1.798819	0.333987	6.153899	0.020907
Aurora B	207	225	CHERKVIHRDIKPENLLMG		2288.211400	all-P	10.000000	2292.399638	0.099651	2.618008	0.319376	6.143241	0.031725
Aurora B	207	225	CHERKVIHRDIKPENLLMG		2288.211400	all-P	30.000002	2293.396223	0.132040	3.614594	0.330916	6.165516	0.011344
Aurora B	207	225	CHERKVIHRDIKPENLLMG		2288.211400	all-P	90.000008	2294.323100	0.109578	4.541471	0.322611	6.154047	0.024156
Aurora B	207	225	CHERKVIHRDIKPENLLMG		2288.211400	no-P	0.000000	2289.781629	0.303431	0.000000	0.000000	6.137027	0.008909
Aurora B	207	225	CHERKVIHRDIKPENLLMG		2288.211400	no-P	3.000000	2292.698182	0.021689	2.916553	0.304205	6.172043	0.002020
Aurora B	207	225	CHERKVIHRDIKPENLLMG		2288.211400	no-P	10.000000	2293.685747	0.108577	3.904118	0.322272	6.145594	0.012330
Aurora B	207	225	CHERKVIHRDIKPENLLMG		2288.211400	no-P	30.000002	2294.391894	0.132782	4.610264	0.331212	6.143288	0.001953
Aurora B	207	225	CHERKVIHRDIKPENLLMG		2288.211400	no-P	90.000008	2295.159019	0.135046	5.377390	0.332126	6.163067	0.014104
Aurora B	210	222	RKVIHRDIKPENL		1617.954700	all-P	0.000000	1619.153624	0.183236	0.000000	0.000000	6.102609	0.011569
Aurora B	210	222	RKVIHRDIKPENL		1617.954700	all-P	3.000000	1621.101781	0.049210	1.948157	0.189728	6.090125	0.021695
Aurora B	210	222	RKVIHRDIKPENL		1617.954700	all-P	10.000000	1621.867399	0.053999	2.713775	0.191027	6.076060	0.018265
Aurora B	210	222	RKVIHRDIKPENL		1617.954700	all-P	30.000002	1622.742115	0.091209	3.588491	0.204681	6.097353	0.008352
Aurora B	210	222	RKVIHRDIKPENL		1617.954700	all-P	90.000008	1623.462658	0.141695	4.309034	0.231631	6.108054	0.019871
Aurora B	210	222	RKVIHRDIKPENL		1617.954700	no-P	0.000000	1619.153624	0.183236	0.000000	0.000000	6.102609	0.011569
Aurora B	210	222	RKVIHRDIKPENL		1617.954700	no-P	3.000000	1622.147972	0.035269	2.994348	0.186599	6.094756	0.018192
Aurora B	210	222	RKVIHRDIKPENL		1617.954700	no-P	10.000000	1622.919961	0.057392	3.766337	0.192013	6.088404	0.023149
Aurora B	210	222	RKVIHRDIKPENL		1617.954700	no-P	30.000002	1623.540316	0.138587	4.386693	0.229742	6.092897	0.014330
Aurora B	210	222	RKVIHRDIKPENL		1617.954700	no-P	90.000008	1624.043859	0.125469	4.890236	0.222076	6.110744	0.006036
Aurora B	210	223	RKVIHRDIKPENLL		1731.038800	all-P	0.000000	1732.260353	0.152743	0.000000	0.000000	7.321402	0.003716
Aurora B	210	223	RKVIHRDIKPENLL		1731.038800	all-P	3.000000	1734.255433	0.054984	1.995080	0.162338	7.323611	0.021388
Aurora B	210	223	RKVIHRDIKPENLL		1731.038800	all-P	10.000000	1735.068021	0.053760	2.807668	0.161927	7.306087	0.017189
Aurora B	210	223	RKVIHRDIKPENLL		1731.038800	all-P	30.000002	1735.996701	0.063540	3.736348	0.165432	7.329909	0.014581
Aurora B	210	223	RKVIHRDIKPENLL		1731.038800	all-P	90.000008	1736.764234	0.096901	4.503880	0.180887	7.334449	0.022008
Aurora B	210	223	RKVIHRDIKPENLL		1731.038800	no-P	0.000000	1732.260353	0.152743	0.000000	0.000000	7.321402	0.003716
Aurora B	210	223	RKVIHRDIKPENLL		1731.038800	no-P	3.000000	1735.358101	0.050152	3.097748	0.160765	7.324524	0.019904
Aurora B	210	223	RKVIHRDIKPENLL		1731.038800	no-P	10.000000	1736.135738	0.082612	3.875385	0.173652	7.318131	0.024438
Aurora B	210	223	RKVIHRDIKPENLL		1731.038800	no-P	30.000002	1736.768476	0.108747	4.508123	0.187500	7.321051	0.020625
Aurora B	210	223	RKVIHRDIKPENLL		1731.038800	no-P	90.000008	1737.319639	0.086703	5.059286	0.175635	7.339499	0.013470
Aurora B	222	230	LLMGYKGEL		1023.554300	all-P	0.000000	1024.428848	0.080937	0.000000	0.000000	8.972627	0.009867
Aurora B	222	230	LLMGYKGEL		1023.554300	all-P	3.000000	1025.691928	0.041518	1.263080	0.090965	8.973608	0.030425
Aurora B	222	230	LLMGYKGEL		1023.554300	all-P	10.000000	1026.045830	0.015063	1.616983	0.082327	8.957001	0.015443
Aurora B	222	230	LLMGYKGEL		1023.554300	all-P	30.000002	1026.168412	0.069928	1.739564	0.106961	8.987255	0.021399
Aurora B	222	230	LLMGYKGEL		1023.554300	all-P	90.000008	1026.324710	0.064894	1.895863	0.103740	8.999287	0.016867
Aurora B	222	230	LLMGYKGEL		1023.554300	no-P	0.000000	1024.428848	0.080937	0.000000	0.000000	8.972627	0.009867
Aurora B	222	230	LLMGYKGEL		1023.554300	no-P	3.000000	1025.750827	0.041836	1.321979	0.091110	8.975672	0.021758
Aurora B	222	230	LLMGYKGEL		1023.554300	no-P	10.000000	1026.078845	0.035174	1.649997	0.088250	8.966532	0.021922
Aurora B	222	230	LLMGYKGEL		1023.554300	no-P	30.000002	1026.281439	0.062748	1.852591	0.102411	8.994417	0.012388
Aurora B	222	230	LLMGYKGEL		1023.554300	no-P	90.000008	1026.474558	0.021056	2.045710	0.083631	8.989664	0.011699
Aurora B	223	230	LMGYKGEL		910.470300	all-P	0.000000	911.457280	0.190874	0.000000	0.000000	8.310802	0.004211
Aurora B	223	230	LMGYKGEL		910.470300	all-P	3.000000	912.628334	0.083470	1.171054	0.208327	8.290158	0.000848
Aurora B	223	230	LMGYKGEL		910.470300	all-P	10.000000	913.032050	0.080537	1.574770	0.207170	8.297428	0.017794
Aurora B	223	230	LMGYKGEL		910.470300	all-P	30.000002	913.171490	0.087152	1.714210	0.209830	8.320712	0.011762
Aurora B	223	230	LMGYKGEL		910.470300	all-P	90.000008	913.315438	0.093750	1.858158	0.212655	8.320556	0.021508
Aurora B	223	230	LMGYKGEL		910.470300	no-P	0.000000	911.457280	0.190874	0.000000	0.000000	8.310802	0.004211
Aurora B	223	230	LMGYKGEL		910.470300	no-P	3.000000	912.721310	0.081025	1.264030	0.207360	8.307318	0.004027
Aurora B	223	230	LMGYKGEL		910.470300	no-P	10.000000	913.028273	0.084257	1.570993	0.208644	8.305911	0.020577
Aurora B	223	230	LMGYKGEL		910.470300	no-P	30.000002	913.230593	0.093254	1.773313	0.212437	8.320955	0.012949
Aurora B	223	230	LMGYKGEL		910.470300	no-P	90.000008	913.406155	0.081974	1.948875	0.207732	8.328648	0.004296
Aurora B	224	230	MGYKGEL		797.386200	all-P	0.000000	798.303136	0.247462	0.000000	0.000000	7.364463	0.008367
Aurora B	224	230	MGYKGEL		797.386200	all-P	3.000000	799.365490	0.104944	1.062354	0.268795	7.366298	0.021588
Aurora B	224	230	MGYKGEL		797.386200	all-P	10.000000	799.693297	0.113252	1.390161	0.272146	7.365074	0.021616
Aurora B	224	230	MGYKGEL		797.386200	all-P	30.000002	799.860946	0.108792	1.557810	0.270320	7.388061	0.011785
Aurora B	224	230	MGYKGEL		797.386200	all-P	90.000008	799.958285	0.081291	1.655149	0.260472	7.394154	0.008943
Aurora B	224	230	MGYKGEL		797.386200	no-P	0.000000	798.303136	0.247462	0.000000	0.000000	7.364463	0.008367
Aurora B	224	230	MGYKGEL		797.386200	no-P	3.000000	799.438618	0.134419	1.135482	0.281613	7.366676	0.009893
Aurora B	224	230	MGYKGEL		797.386200	no-P	10.000000	799.692057	0.109762	1.388921	0.270712	7.370119	0.010357
Aurora B	224	230	MGYKGEL		797.386200	no-P	30.000002	799.889143	0.138660	1.586007	0.283662	7.382505	0.007005
Aurora B	224	230	MGYKGEL		797.386200	no-P	90.000008	800.068341	0.127087	1.765205	0.278188	7.394251	0.004689
Aurora B	225	230	GYKGEL		666.345700	all-P	0.000000	666.784779	0.011038	0.000000	0.000000	7.375627	0.008255
Aurora B	225	230	GYKGEL		666.345700	all-P	3.000000	667.794867	0.023011	1.010088	0.025522	7.369689	0.019819
Aurora B	225	230	GYKGEL		666.345700	all-P	10.000000	668.067494	0.026600	1.282714	0.028799	7.358639	0.018703
Aurora B	225	230	GYKGEL		666.345700	all-P	30.000002	668.180968	0.031341	1.396188	0.033228	7.382071	0.011207
Aurora B	225	230	GYKGEL		666.345700	all-P	90.000008	668.310014	0.024147	1.525234	0.026550	7.384530	0.022246
Aurora B	225	230	GYKGEL		666.345700	no-P	0.000000	666.784779	0.011038	0.000000	0.000000	7.375627	0.008255
Aurora B	225	230	GYKGEL		666.345700	no-P	3.000000	667.817657	0.030578	1.032877	0.032509	7.370684	0.013345
Aurora B	225	230	GYKGEL		666.345700	no-P	10.000000	668.013567	0.025377	1.228788	0.027673	7.367718	0.016462
Aurora B	225	230	GYKGEL		666.345700	no-P	30.000002	668.209758	0.012802	1.424978	0.016903	7.383359	0.009934
Aurora B	225	230	GYKGEL		666.345700	no-P	90.000008	668.359174	0.014920	1.574394	0.018559	7.386607	0.007223
Aurora B	225	234	GYKGELKIAD		1093.588800	all-P	0.000000	1094.522666	0.019318	0.000000	0.000000	6.755322	0.010041
Aurora B	225	234	GYKGELKIAD		1093.588800	all-P	3.000000	1097.163812	0.346475	2.641146	0.347013	6.755998	0.016681
Aurora B	225	234	GYKGELKIAD		1093.588800	all-P	10.000000	1097.545120	0.199234	3.022453	0.200169	6.750199	0.020544
Aurora B	225	234	GYKGELKIAD		1093.588800	all-P	30.000002	1097.638712	0.303952	3.116045	0.304565	6.771089	0.007219
Aurora B	225	234	GYKGELKIAD		1093.588800	all-P	90.000008	1097.536296	0.280838	3.013630	0.281502	6.775184	0.024927
Aurora B	225	234	GYKGELKIAD		1093.588800	no-P	0.000000	1094.522666	0.019318	0.000000	0.000000	6.755322	0.010041
Aurora B	225	234	GYKGELKIAD		1093.588800	no-P	3.000000	1098.893887	0.168441	4.371220	0.169545	6.741150	0.011442
Aurora B	225	234	GYKGELKIAD		1093.588800	no-P	10.000000	1098.993802	0.093761	4.471136	0.095731	6.732649	0.012072
Aurora B	225	234	GYKGELKIAD		1093.588800	no-P	30.000002	1099.126122	0.285823	4.603455	0.286475	6.751241	0.001788
Aurora B	225	234	GYKGELKIAD		1093.588800	no-P	90.000008	1099.276130	0.415288	4.753464	0.415737	6.747347	0.000465
Aurora B	226	230	YKGEL		609.324300	all-P	0.000000	609.606791	0.017908	0.000000	0.000000	6.406892	0.001688
Aurora B	226	230	YKGEL		609.324300	all-P	3.000000	609.817376	0.026898	0.210585	0.032314	6.407190	0.017514
Aurora B	226	230	YKGEL		609.324300	all-P	10.000000	609.898248	0.013348	0.291457	0.022335	6.397427	0.018094
Aurora B	226	230	YKGEL		609.324300	all-P	30.000002	609.951168	0.037433	0.344377	0.041496	6.414340	0.010626
Aurora B	226	230	YKGEL		609.324300	all-P	90.000008	610.104913	0.029086	0.498122	0.034157	6.415430	0.018825
Aurora B	226	230	YKGEL		609.324300	no-P	0.000000	609.606791	0.017908	0.000000	0.000000	6.406892	0.001688
Aurora B	226	230	YKGEL		609.324300	no-P	3.000000	609.841663	0.017498	0.234872	0.025037	6.406382	0.014259
Aurora B	226	230	YKGEL		609.324300	no-P	10.000000	609.894367	0.023627	0.287576	0.029647	6.402248	0.015893
Aurora B	226	230	YKGEL		609.324300	no-P	30.000002	609.977612	0.023033	0.370821	0.029176	6.411862	0.014297
Aurora B	226	230	YKGEL		609.324300	no-P	90.000008	610.148094	0.032612	0.541303	0.037205	6.420417	0.000900
Aurora B	231	234	KIAD		446.260900	all-P	0.000000	446.536483	0.011717	0.000000	0.000000	4.030470	0.001442
Aurora B	231	234	KIAD		446.260900	all-P	3.000000	447.113935	0.014098	0.577452	0.018332	4.004564	0.013193
Aurora B	231	234	KIAD		446.260900	all-P	10.000000	447.206809	0.014640	0.670326	0.018752	3.996342	0.008531
Aurora B	231	234	KIAD		446.260900	all-P	30.000002	447.302969	0.029893	0.766486	0.032107	4.014039	0.015460
Aurora B	231	234	KIAD		446.260900	all-P	90.000008	447.452225	0.004801	0.915742	0.012662	4.013866	0.018066
Aurora B	231	234	KIAD		446.260900	no-P	0.000000	446.536483	0.011717	0.000000	0.000000	4.030470	0.001442
Aurora B	231	234	KIAD		446.260900	no-P	3.000000	447.159198	0.024159	0.622715	0.026851	4.006806	0.007194
Aurora B	231	234	KIAD		446.260900	no-P	10.000000	447.205898	0.034113	0.669414	0.036069	3.998519	0.008294
Aurora B	231	234	KIAD		446.260900	no-P	30.000002	447.299900	0.036162	0.763417	0.038012	4.020113	0.016541
Aurora B	231	234	KIAD		446.260900	no-P	90.000008	447.420851	0.005837	0.884368	0.013090	4.027262	0.008081
Aurora B	231	235	KIADF		593.329300	all-P	0.000000	593.605935	0.010140	0.000000	0.000000	7.653325	0.006623
Aurora B	231	235	KIADF		593.329300	all-P	3.000000	594.751023	0.042935	1.145087	0.044117	7.644076	0.020053
Aurora B	231	235	KIADF		593.329300	all-P	10.000000	594.877425	0.036373	1.271490	0.037760	7.632784	0.015259
Aurora B	231	235	KIADF		593.329300	all-P	30.000002	594.977125	0.047517	1.371190	0.048587	7.669085	0.008849
Aurora B	231	235	KIADF		593.329300	all-P	90.000008	595.040082	0.025731	1.434147	0.027657	7.666894	0.019734
Aurora B	231	235	KIADF		593.329300	no-P	0.000000	593.605935	0.010140	0.000000	0.000000	7.653325	0.006623
Aurora B	231	235	KIADF		593.329300	no-P	3.000000	594.852392	0.038008	1.246456	0.039338	7.649836	0.014612
Aurora B	231	235	KIADF		593.329300	no-P	10.000000	594.854572	0.058551	1.248637	0.059422	7.637437	0.014897
Aurora B	231	235	KIADF		593.329300	no-P	30.000002	594.904808	0.034690	1.298872	0.036142	7.654201	0.017100
Aurora B	231	235	KIADF		593.329300	no-P	90.000008	595.008650	0.068307	1.402715	0.069056	7.667203	0.011981
Aurora B	231	237	KIADFGW		836.430100	all-P	0.000000	837.050454	0.110455	0.000000	0.000000	9.867632	0.008249
Aurora B	231	237	KIADFGW		836.430100	all-P	3.000000	838.856253	0.054054	1.805799	0.122972	9.846648	0.022488
Aurora B	231	237	KIADFGW		836.430100	all-P	10.000000	839.197790	0.046070	2.147337	0.119678	9.832205	0.018609
Aurora B	231	237	KIADFGW		836.430100	all-P	30.000002	839.348287	0.046741	2.297833	0.119937	9.866146	0.011519
Aurora B	231	237	KIADFGW		836.430100	all-P	90.000008	839.514842	0.075924	2.464389	0.134032	9.866210	0.015448
Aurora B	231	237	KIADFGW		836.430100	no-P	0.000000	837.050454	0.110455	0.000000	0.000000	9.867632	0.008249
Aurora B	231	237	KIADFGW		836.430100	no-P	3.000000	839.176380	0.074581	2.125926	0.133276	9.849444	0.018193
Aurora B	231	237	KIADFGW		836.430100	no-P	10.000000	839.192366	0.091921	2.141912	0.143700	9.845230	0.026799
Aurora B	231	237	KIADFGW		836.430100	no-P	30.000002	839.295097	0.027047	2.244644	0.113718	9.871012	0.017027
Aurora B	231	237	KIADFGW		836.430100	no-P	90.000008	839.439007	0.044352	2.388553	0.119027	9.876048	0.004578
Aurora B	231	244	KIADFGWSVHAPSL		1527.795400	all-P	0.000000	1529.210206	0.180538	0.000000	0.000000	9.511466	0.008969
Aurora B	231	244	KIADFGWSVHAPSL		1527.795400	all-P	3.000000	1534.945448	0.032937	5.735242	0.183518	9.544669	0.004366
Aurora B	231	244	KIADFGWSVHAPSL		1527.795400	all-P	10.000000	1535.175865	0.152572	5.965660	0.236373	9.499888	0.025443
Aurora B	231	244	KIADFGWSVHAPSL		1527.795400	all-P	30.000002	1535.511054	0.075609	6.300848	0.195731	9.540946	0.016989
Aurora B	231	244	KIADFGWSVHAPSL		1527.795400	all-P	90.000008	1535.568195	0.063924	6.357989	0.191521	9.556356	0.004221
Aurora B	231	244	KIADFGWSVHAPSL		1527.795400	no-P	0.000000	1529.210206	0.180538	0.000000	0.000000	9.511466	0.008969
Aurora B	231	244	KIADFGWSVHAPSL		1527.795400	no-P	3.000000	1535.119409	0.276903	5.909203	0.330559	9.514592	0.021062
Aurora B	231	244	KIADFGWSVHAPSL		1527.795400	no-P	10.000000	1535.274563	0.156936	6.064358	0.239213	9.508994	0.022081
Aurora B	231	244	KIADFGWSVHAPSL		1527.795400	no-P	30.000002	1535.504796	0.052091	6.294590	0.187903	9.556996	0.001771
Aurora B	231	244	KIADFGWSVHAPSL		1527.795400	no-P	90.000008	1535.620597	0.057503	6.410391	0.189475	9.538568	0.017329
Aurora B	235	244	FGWSVHAPSL		1100.552400	all-P	0.000000	1102.472341	0.661281	0.000000	0.000000	9.695100	0.013233
Aurora B	235	244	FGWSVHAPSL		1100.552400	all-P	3.000000	1105.871759	0.123176	3.399418	0.672655	9.707647	0.017961
Aurora B	235	244	FGWSVHAPSL		1100.552400	all-P	10.000000	1106.125614	0.181160	3.653273	0.685647	9.708620	0.029996
Aurora B	235	244	FGWSVHAPSL		1100.552400	all-P	30.000002	1106.174268	0.184965	3.701927	0.686661	9.723527	0.017210
Aurora B	235	244	FGWSVHAPSL		1100.552400	all-P	90.000008	1106.202679	0.055520	3.730338	0.663607	9.755937	0.020245
Aurora B	235	244	FGWSVHAPSL		1100.552400	no-P	0.000000	1102.472341	0.661281	0.000000	0.000000	9.695100	0.013233
Aurora B	235	244	FGWSVHAPSL		1100.552400	no-P	3.000000	1105.964828	0.143627	3.492487	0.676698	9.715723	0.025236
Aurora B	235	244	FGWSVHAPSL		1100.552400	no-P	10.000000	1106.045354	0.131577	3.573013	0.674244	9.716611	0.029776
Aurora B	235	244	FGWSVHAPSL		1100.552400	no-P	30.000002	1106.193118	0.108575	3.720777	0.670135	9.728505	0.029688
Aurora B	235	244	FGWSVHAPSL		1100.552400	no-P	90.000008	1106.165145	0.088266	3.692804	0.667145	9.723925	0.023952
Aurora B	236	244	GWSVHAPSL		953.483900	all-P	0.000000	953.971120	0.032564	0.000000	0.000000	9.722583	0.003328
Aurora B	236	244	GWSVHAPSL		953.483900	all-P	3.000000	958.361179	0.046339	4.390059	0.056637	9.711312	0.023105
Aurora B	236	244	GWSVHAPSL		953.483900	all-P	10.000000	958.528118	0.080275	4.556998	0.086629	9.699699	0.020895
Aurora B	236	244	GWSVHAPSL		953.483900	all-P	30.000002	958.516214	0.053526	4.545094	0.062654	9.728725	0.013897
Aurora B	236	244	GWSVHAPSL		953.483900	all-P	90.000008	958.478298	0.118274	4.507178	0.122675	9.738680	0.014410
Aurora B	236	244	GWSVHAPSL		953.483900	no-P	0.000000	953.971120	0.032564	0.000000	0.000000	9.722583	0.003328
Aurora B	236	244	GWSVHAPSL		953.483900	no-P	3.000000	958.521002	0.032416	4.549882	0.045948	9.710864	0.018247
Aurora B	236	244	GWSVHAPSL		953.483900	no-P	10.000000	958.523357	0.020377	4.552237	0.038414	9.704805	0.023338
Aurora B	236	244	GWSVHAPSL		953.483900	no-P	30.000002	958.490467	0.086579	4.519347	0.092501	9.732038	0.012520
Aurora B	236	244	GWSVHAPSL		953.483900	no-P	90.000008	958.490307	0.078039	4.519187	0.084561	9.735766	0.013383
Aurora B	237	244	WSVHAPSL		896.462500	all-P	0.000000	897.216996	0.072331	0.000000	0.000000	8.723094	0.006956
Aurora B	237	244	WSVHAPSL		896.462500	all-P	3.000000	900.793368	0.104266	3.576372	0.126898	8.703810	0.023343
Aurora B	237	244	WSVHAPSL		896.462500	all-P	10.000000	900.813221	0.072527	3.596225	0.102431	8.690495	0.022999
Aurora B	237	244	WSVHAPSL		896.462500	all-P	30.000002	900.941298	0.034800	3.724302	0.080268	8.715768	0.009762
Aurora B	237	244	WSVHAPSL		896.462500	all-P	90.000008	900.944843	0.029086	3.727848	0.077960	8.717009	0.013791
Aurora B	237	244	WSVHAPSL		896.462500	no-P	0.000000	897.216996	0.072331	0.000000	0.000000	8.723094	0.006956
Aurora B	237	244	WSVHAPSL		896.462500	no-P	3.000000	900.804654	0.109306	3.587658	0.131071	8.704941	0.014086
Aurora B	237	244	WSVHAPSL		896.462500	no-P	10.000000	900.779129	0.090762	3.562133	0.116059	8.701193	0.019317
Aurora B	237	244	WSVHAPSL		896.462500	no-P	30.000002	900.906964	0.048743	3.689968	0.087222	8.714446	0.011505
Aurora B	237	244	WSVHAPSL		896.462500	no-P	90.000008	900.907977	0.018535	3.690982	0.074669	8.720621	0.007196
Aurora B	238	244	SVHAPSL		710.383200	all-P	0.000000	710.666867	0.034067	0.000000	0.000000	8.770843	0.009261
Aurora B	238	244	SVHAPSL		710.383200	all-P	3.000000	713.808764	0.092858	3.141897	0.098910	8.757974	0.022166
Aurora B	238	244	SVHAPSL		710.383200	all-P	10.000000	713.763290	0.013913	3.096423	0.036799	8.751544	0.018495
Aurora B	238	244	SVHAPSL		710.383200	all-P	30.000002	713.831171	0.063160	3.164304	0.071762	8.781614	0.009111
Aurora B	238	244	SVHAPSL		710.383200	all-P	90.000008	713.699896	0.127161	3.033030	0.131645	8.792429	0.010377
Aurora B	238	244	SVHAPSL		710.383200	no-P	0.000000	710.666867	0.034067	0.000000	0.000000	8.770843	0.009261
Aurora B	238	244	SVHAPSL		710.383200	no-P	3.000000	713.773141	0.052260	3.106275	0.062383	8.765139	0.018603
Aurora B	238	244	SVHAPSL		710.383200	no-P	10.000000	713.822190	0.113831	3.155324	0.118820	8.763658	0.020274
Aurora B	238	244	SVHAPSL		710.383200	no-P	30.000002	713.760306	0.093409	3.093440	0.099427	8.790354	0.007262
Aurora B	238	244	SVHAPSL		710.383200	no-P	90.000008	713.807615	0.224424	3.140749	0.226995	8.788887	0.010668
Aurora B	253	260	LDYLPPEM		977.464800	all-P	0.000000	978.028746	0.075789	0.000000	0.000000	9.384575	0.005763
Aurora B	253	260	LDYLPPEM		977.464800	all-P	3.000000	978.370065	0.026239	0.341319	0.080202	9.384295	0.022098
Aurora B	253	260	LDYLPPEM		977.464800	all-P	10.000000	978.735220	0.036665	0.706474	0.084192	9.375949	0.020651
Aurora B	253	260	LDYLPPEM		977.464800	all-P	30.000002	979.038035	0.053994	1.009289	0.093055	9.398641	0.015733
Aurora B	253	260	LDYLPPEM		977.464800	all-P	90.000008	979.380753	0.045853	1.352007	0.088580	9.411937	0.013716
Aurora B	253	260	LDYLPPEM		977.464800	no-P	0.000000	978.058191	0.047353	0.000000	0.000000	9.382697	0.003933
Aurora B	253	260	LDYLPPEM		977.464800	no-P	3.000000	978.786337	0.075039	0.728146	0.088731	9.394513	0.017985
Aurora B	253	260	LDYLPPEM		977.464800	no-P	10.000000	979.019015	0.050568	0.960824	0.069279	9.383123	0.022852
Aurora B	253	260	LDYLPPEM		977.464800	no-P	30.000002	979.500074	0.080191	1.441883	0.093128	9.401459	0.011942
Aurora B	253	260	LDYLPPEM		977.464800	no-P	90.000008	980.046197	0.018713	1.988006	0.050917	9.407759	0.006295
Aurora B	254	260	DYLPPEM		864.380800	all-P	0.000000	865.291681	0.021294	0.000000	0.000000	8.570511	0.006168
Aurora B	254	260	DYLPPEM		864.380800	all-P	3.000000	865.353240	0.034918	0.061559	0.040899	8.572369	0.016559
Aurora B	254	260	DYLPPEM		864.380800	all-P	10.000000	865.434611	0.019079	0.142930	0.028591	8.563494	0.015257
Aurora B	254	260	DYLPPEM		864.380800	all-P	30.000002	865.513222	0.034054	0.221541	0.040164	8.586185	0.009060
Aurora B	254	260	DYLPPEM		864.380800	all-P	90.000008	865.736656	0.043946	0.444975	0.048834	8.588449	0.015190
Aurora B	254	260	DYLPPEM		864.380800	no-P	0.000000	865.291681	0.021294	0.000000	0.000000	8.570511	0.006168
Aurora B	254	260	DYLPPEM		864.380800	no-P	3.000000	865.415706	0.033044	0.124025	0.039311	8.578974	0.011848
Aurora B	254	260	DYLPPEM		864.380800	no-P	10.000000	865.563313	0.054520	0.271632	0.058531	8.571787	0.013008
Aurora B	254	260	DYLPPEM		864.380800	no-P	30.000002	865.852475	0.075775	0.560794	0.078710	8.581890	0.015953
Aurora B	254	260	DYLPPEM		864.380800	no-P	90.000008	866.317787	0.143843	1.026106	0.145411	8.581827	0.008858
Aurora B	254	262	DYLPPEMIE		1106.507400	all-P	30.000002	1106.583487	0.000000	NaN	NaN	9.744890	0.000000
Aurora B	254	262	DYLPPEMIE		1106.507400	no-P	10.000000	1106.655837	0.000000	NaN	NaN	9.763061	0.000000
Aurora B	254	272	DYLPPEMIEGKTHDEKVDL		2229.074400	all-P	0.000000	2230.468063	0.024027	0.000000	0.000000	8.269812	0.003132
Aurora B	254	272	DYLPPEMIEGKTHDEKVDL		2229.074400	all-P	3.000000	2233.072148	0.040288	2.604085	0.046909	8.256290	0.023167
Aurora B	254	272	DYLPPEMIEGKTHDEKVDL		2229.074400	all-P	10.000000	2233.658041	0.120652	3.189978	0.123022	8.242745	0.017074
Aurora B	254	272	DYLPPEMIEGKTHDEKVDL		2229.074400	all-P	30.000002	2234.613811	0.191164	4.145748	0.192668	8.273890	0.009714
Aurora B	254	272	DYLPPEMIEGKTHDEKVDL		2229.074400	all-P	90.000008	2235.427598	0.119613	4.959535	0.122002	8.279388	0.016752
Aurora B	254	272	DYLPPEMIEGKTHDEKVDL		2229.074400	no-P	0.000000	2230.468063	0.024027	0.000000	0.000000	8.269812	0.003132
Aurora B	254	272	DYLPPEMIEGKTHDEKVDL		2229.074400	no-P	3.000000	2234.191531	0.127680	3.723469	0.129921	8.260040	0.021073
Aurora B	254	272	DYLPPEMIEGKTHDEKVDL		2229.074400	no-P	10.000000	2234.940866	0.185892	4.472803	0.187438	8.251717	0.020295
Aurora B	254	272	DYLPPEMIEGKTHDEKVDL		2229.074400	no-P	30.000002	2236.127431	0.080572	5.659368	0.084078	8.274942	0.018189
Aurora B	254	272	DYLPPEMIEGKTHDEKVDL		2229.074400	no-P	90.000008	2237.461145	0.155077	6.993083	0.156927	8.272578	0.010807
Aurora B	255	260	YLPPEM		749.353800	all-P	0.000000	749.718423	0.069922	0.000000	0.000000	8.089835	0.006580
Aurora B	255	260	YLPPEM		749.353800	all-P	3.000000	749.927213	0.035508	0.208790	0.078421	8.086923	0.020991
Aurora B	255	260	YLPPEM		749.353800	all-P	10.000000	749.951979	0.031366	0.233555	0.076635	8.081636	0.021933
Aurora B	255	260	YLPPEM		749.353800	all-P	30.000002	750.087383	0.054695	0.368960	0.088773	8.098545	0.005594
Aurora B	255	260	YLPPEM		749.353800	all-P	90.000008	750.413748	0.081925	0.695324	0.107707	8.096346	0.014403
Aurora B	255	260	YLPPEM		749.353800	no-P	0.000000	749.760487	0.009844	0.000000	0.000000	8.089610	0.006317
Aurora B	255	260	YLPPEM		749.353800	no-P	3.000000	750.248234	0.166523	0.487747	0.166814	8.086068	0.012073
Aurora B	255	260	YLPPEM		749.353800	no-P	10.000000	750.465893	0.118222	0.705406	0.118631	8.084310	0.020392
Aurora B	255	260	YLPPEM		749.353800	no-P	30.000002	750.759780	0.074245	0.999293	0.074895	8.084247	0.004723
Aurora B	255	260	YLPPEM		749.353800	no-P	90.000008	751.178105	0.034964	1.417618	0.036324	8.099180	0.006177
Aurora B	256	260	LPPEM		586.290500	all-P	0.000000	586.627352	0.016557	0.000000	0.000000	8.573096	0.000994
Aurora B	256	260	LPPEM		586.290500	all-P	3.000000	586.742722	0.098786	0.115370	0.100164	8.573690	0.017357
Aurora B	256	260	LPPEM		586.290500	all-P	10.000000	586.751006	0.032904	0.123654	0.036834	8.560479	0.012406
Aurora B	256	260	LPPEM		586.290500	all-P	30.000002	586.747220	0.019174	0.119869	0.025333	8.585305	0.013600
Aurora B	256	260	LPPEM		586.290500	all-P	90.000008	586.876419	0.004083	0.249068	0.017053	8.590732	0.017206
Aurora B	256	260	LPPEM		586.290500	no-P	0.000000	586.627352	0.016557	0.000000	0.000000	8.573096	0.000994
Aurora B	256	260	LPPEM		586.290500	no-P	3.000000	586.808661	0.084555	0.181310	0.086161	8.578284	0.015824
Aurora B	256	260	LPPEM		586.290500	no-P	10.000000	586.852706	0.033174	0.225354	0.037076	8.570308	0.014030
Aurora B	256	260	LPPEM		586.290500	no-P	30.000002	586.929938	0.018033	0.302587	0.024481	8.580542	0.013546
Aurora B	256	260	LPPEM		586.290500	no-P	90.000008	587.195874	0.025098	0.568522	0.030067	8.586554	0.008574
Aurora B	261	264	IEGK		446.260900	all-P	0.000000	446.451694	0.010615	0.000000	0.000000	6.614572	0.006935
Aurora B	261	264	IEGK		446.260900	all-P	3.000000	446.970943	0.020952	0.519249	0.023488	6.609959	0.017438
Aurora B	261	264	IEGK		446.260900	all-P	10.000000	447.187140	0.015023	0.735446	0.018395	6.595525	0.009446
Aurora B	261	264	IEGK		446.260900	all-P	30.000002	447.319325	0.010109	0.867631	0.014658	6.618555	0.011900
Aurora B	261	264	IEGK		446.260900	all-P	90.000008	447.423677	0.034221	0.971983	0.035829	6.624191	0.018624
Aurora B	261	264	IEGK		446.260900	no-P	0.000000	446.451694	0.010615	0.000000	0.000000	6.614572	0.006935
Aurora B	261	264	IEGK		446.260900	no-P	3.000000	447.000869	0.013211	0.549175	0.016947	6.612230	0.013257
Aurora B	261	264	IEGK		446.260900	no-P	10.000000	447.193846	0.020198	0.742152	0.022817	6.603350	0.016107
Aurora B	261	264	IEGK		446.260900	no-P	30.000002	447.340276	0.015394	0.888582	0.018699	6.615370	0.008726
Aurora B	261	264	IEGK		446.260900	no-P	90.000008	447.482204	0.027933	1.030510	0.029882	6.621000	0.008371
Aurora B	261	272	IEGKTHDEKVDL		1383.711400	all-P	0.000000	1385.167146	0.795005	0.000000	0.000000	6.286355	0.055051
Aurora B	261	272	IEGKTHDEKVDL		1383.711400	all-P	3.000000	1386.922212	0.070208	1.755066	0.798099	6.218317	0.009935
Aurora B	261	272	IEGKTHDEKVDL		1383.711400	all-P	10.000000	1387.169745	0.029493	2.002599	0.795552	6.209099	0.011571
Aurora B	261	272	IEGKTHDEKVDL		1383.711400	all-P	30.000002	1387.553494	0.108226	2.386348	0.802338	6.254706	0.027323
Aurora B	261	272	IEGKTHDEKVDL		1383.711400	all-P	90.000008	1387.899628	0.073800	2.732482	0.798423	6.239164	0.017439
Aurora B	261	272	IEGKTHDEKVDL		1383.711400	no-P	0.000000	1385.167146	0.795005	0.000000	0.000000	6.286355	0.055051
Aurora B	261	272	IEGKTHDEKVDL		1383.711400	no-P	3.000000	1387.301828	0.098092	2.134682	0.801034	6.232650	0.015168
Aurora B	261	272	IEGKTHDEKVDL		1383.711400	no-P	10.000000	1387.712136	0.082492	2.544990	0.799273	6.219852	0.016110
Aurora B	261	272	IEGKTHDEKVDL		1383.711400	no-P	30.000002	1388.057101	0.070032	2.889955	0.798084	6.229453	0.029293
Aurora B	261	272	IEGKTHDEKVDL		1383.711400	no-P	90.000008	1388.428003	0.038951	3.260857	0.795959	6.238977	0.014833
Aurora B	262	272	EGKTHDEKVDL		1270.627400	all-P	0.000000	1271.656600	0.028678	0.000000	0.000000	6.227896	0.008753
Aurora B	262	272	EGKTHDEKVDL		1270.627400	all-P	3.000000	1273.257702	0.023701	1.601102	0.037204	6.226570	0.016145
Aurora B	262	272	EGKTHDEKVDL		1270.627400	all-P	10.000000	1273.418426	0.015613	1.761826	0.032652	6.216363	0.015015
Aurora B	262	272	EGKTHDEKVDL		1270.627400	all-P	30.000002	1273.707157	0.045584	2.050557	0.053855	6.231201	0.019709
Aurora B	262	272	EGKTHDEKVDL		1270.627400	all-P	90.000008	1273.960485	0.071536	2.303885	0.077070	6.247231	0.018836
Aurora B	262	272	EGKTHDEKVDL		1270.627400	no-P	0.000000	1271.656600	0.028678	0.000000	0.000000	6.227896	0.008753
Aurora B	262	272	EGKTHDEKVDL		1270.627400	no-P	3.000000	1273.602573	0.015512	1.945974	0.032604	6.230719	0.014966
Aurora B	262	272	EGKTHDEKVDL		1270.627400	no-P	10.000000	1273.981037	0.066431	2.324437	0.072357	6.220374	0.015068
Aurora B	262	272	EGKTHDEKVDL		1270.627400	no-P	30.000002	1274.149225	0.052957	2.492626	0.060223	6.230115	0.017158
Aurora B	262	272	EGKTHDEKVDL		1270.627400	no-P	90.000008	1274.447381	0.045603	2.790781	0.053870	6.241199	0.010216
Aurora B	273	276	WCAG		436.164900	all-P	0.000000	436.376339	0.051330	0.000000	0.000000	6.623218	0.010404
Aurora B	273	276	WCAG		436.164900	all-P	3.000000	436.484879	0.007571	0.108539	0.051885	6.609590	0.013082
Aurora B	273	276	WCAG		436.164900	all-P	10.000000	436.513389	0.007556	0.137050	0.051883	6.596526	0.009059
Aurora B	273	276	WCAG		436.164900	all-P	30.000002	436.507542	0.027186	0.131203	0.058085	6.611543	0.016905
Aurora B	273	276	WCAG		436.164900	all-P	90.000008	436.510365	0.029791	0.134026	0.059349	6.619650	0.016470
Aurora B	273	276	WCAG		436.164900	no-P	0.000000	436.376339	0.051330	0.000000	0.000000	6.623218	0.010404
Aurora B	273	276	WCAG		436.164900	no-P	3.000000	436.455039	0.028743	0.078699	0.058830	6.611240	0.015195
Aurora B	273	276	WCAG		436.164900	no-P	10.000000	436.471024	0.060934	0.094685	0.079672	6.598252	0.008946
Aurora B	273	276	WCAG		436.164900	no-P	30.000002	436.467045	0.056516	0.090706	0.076347	6.604383	0.012739
Aurora B	273	276	WCAG		436.164900	no-P	90.000008	436.517142	0.026476	0.140803	0.057756	6.617607	0.002312
Aurora B	273	278	WCAGVL		648.317400	all-P	0.000000	649.243483	0.045452	0.000000	0.000000	9.671078	0.013261
Aurora B	273	278	WCAGVL		648.317400	all-P	3.000000	649.268553	0.025138	0.025070	0.051941	9.674371	0.026653
Aurora B	273	278	WCAGVL		648.317400	all-P	10.000000	649.293428	0.025660	0.049945	0.052196	9.655568	0.007817
Aurora B	273	278	WCAGVL		648.317400	all-P	30.000002	649.332673	0.001093	0.089190	0.045466	9.694084	0.008303
Aurora B	273	278	WCAGVL		648.317400	all-P	90.000008	649.345702	0.032139	0.102219	0.055667	9.690745	0.016917
Aurora B	273	278	WCAGVL		648.317400	no-P	0.000000	649.243483	0.045452	0.000000	0.000000	9.671078	0.013261
Aurora B	273	278	WCAGVL		648.317400	no-P	3.000000	649.261743	0.037030	0.018260	0.058627	9.671067	0.017532
Aurora B	273	278	WCAGVL		648.317400	no-P	10.000000	649.336841	0.050516	0.093358	0.067954	9.665092	0.017106
Aurora B	273	278	WCAGVL		648.317400	no-P	30.000002	649.405135	0.022138	0.161652	0.050557	9.694701	0.023136
Aurora B	273	278	WCAGVL		648.317400	no-P	90.000008	649.422665	0.003091	0.179182	0.045557	9.684448	0.008420
Aurora B	279	282	CYEF		561.201400	all-P	0.000000	561.692531	0.022540	0.000000	0.000000	8.888153	0.003642
Aurora B	279	282	CYEF		561.201400	all-P	3.000000	561.681041	0.024063	-0.011490	0.032971	8.877681	0.023146
Aurora B	279	282	CYEF		561.201400	all-P	10.000000	561.699650	0.005523	0.007120	0.023207	8.857626	0.015140
Aurora B	279	282	CYEF		561.201400	all-P	30.000002	561.696922	0.014371	0.004391	0.026732	8.888117	0.010353
Aurora B	279	282	CYEF		561.201400	all-P	90.000008	561.686928	0.025632	-0.005602	0.034132	8.885966	0.011834
Aurora B	279	282	CYEF		561.201400	no-P	0.000000	561.692531	0.022540	0.000000	0.000000	8.888153	0.003642
Aurora B	279	282	CYEF		561.201400	no-P	3.000000	561.678170	0.037881	-0.014361	0.044080	8.878371	0.014849
Aurora B	279	282	CYEF		561.201400	no-P	10.000000	561.670803	0.012061	-0.021728	0.025564	8.870974	0.017796
Aurora B	279	282	CYEF		561.201400	no-P	30.000002	561.745284	0.029885	0.052753	0.037432	8.887571	0.009150
Aurora B	279	282	CYEF		561.201400	no-P	90.000008	561.719025	0.020328	0.026494	0.030352	8.890510	0.001915
Aurora B	279	283	CYEFL		674.285400	all-P	0.000000	674.630214	0.016013	0.000000	0.000000	10.244720	0.000479
Aurora B	279	283	CYEFL		674.285400	all-P	3.000000	674.685213	0.024480	0.054999	0.029252	10.231771	0.023725
Aurora B	279	283	CYEFL		674.285400	all-P	10.000000	674.689616	0.016996	0.059402	0.023351	10.221571	0.020196
Aurora B	279	283	CYEFL		674.285400	all-P	30.000002	674.662901	0.010881	0.032687	0.019360	10.260910	0.003607
Aurora B	279	283	CYEFL		674.285400	all-P	90.000008	674.659470	0.017274	0.029255	0.023555	10.255150	0.009180
Aurora B	279	283	CYEFL		674.285400	no-P	0.000000	674.630214	0.016013	0.000000	0.000000	10.244720	0.000479
Aurora B	279	283	CYEFL		674.285400	no-P	3.000000	674.708119	0.053340	0.077905	0.055691	10.237927	0.019167
Aurora B	279	283	CYEFL		674.285400	no-P	10.000000	674.725726	0.012867	0.095511	0.020542	10.238825	0.024443
Aurora B	279	283	CYEFL		674.285400	no-P	30.000002	674.678326	0.006634	0.048112	0.017333	10.255218	0.012602
Aurora B	279	283	CYEFL		674.285400	no-P	90.000008	674.748344	0.024363	0.118130	0.029154	10.259239	0.003842
Aurora B	280	283	YEFL		571.276200	all-P	0.000000	571.828054	0.012989	0.000000	0.000000	10.020973	0.009616
Aurora B	280	283	YEFL		571.276200	all-P	3.000000	571.867787	0.033043	0.039734	0.035504	10.004287	0.025786
Aurora B	280	283	YEFL		571.276200	all-P	10.000000	571.876382	0.012634	0.048328	0.018119	9.990332	0.019963
Aurora B	280	283	YEFL		571.276200	all-P	30.000002	571.888052	0.018706	0.059998	0.022773	10.029393	0.015672
Aurora B	280	283	YEFL		571.276200	all-P	90.000008	571.894440	0.023805	0.066387	0.027118	10.016706	0.018890
Aurora B	280	283	YEFL		571.276200	no-P	0.000000	571.828054	0.012989	0.000000	0.000000	10.020973	0.009616
Aurora B	280	283	YEFL		571.276200	no-P	3.000000	571.867181	0.025042	0.039127	0.028210	10.006006	0.019952
Aurora B	280	283	YEFL		571.276200	no-P	10.000000	571.864092	0.016925	0.036039	0.021335	10.006412	0.033097
Aurora B	280	283	YEFL		571.276200	no-P	30.000002	571.917881	0.018818	0.089827	0.022866	10.024376	0.019432
Aurora B	280	283	YEFL		571.276200	no-P	90.000008	571.909543	0.009847	0.081490	0.016299	10.034369	0.003580
Aurora B	282	297	FLVGMPPFDSPSHTET		1761.815200	all-P	0.000000	1763.175421	0.078892	0.000000	0.000000	9.336511	0.004172
Aurora B	282	297	FLVGMPPFDSPSHTET		1761.815200	all-P	3.000000	1766.196431	0.110054	3.021010	0.135410	9.335660	0.022943
Aurora B	282	297	FLVGMPPFDSPSHTET		1761.815200	all-P	10.000000	1766.410046	0.189580	3.234625	0.205340	9.327251	0.020932
Aurora B	282	297	FLVGMPPFDSPSHTET		1761.815200	all-P	30.000002	1766.688037	0.159709	3.512616	0.178131	9.348684	0.014851
Aurora B	282	297	FLVGMPPFDSPSHTET		1761.815200	all-P	90.000008	1766.907898	0.153212	3.732478	0.172331	9.365335	0.019674
Aurora B	282	297	FLVGMPPFDSPSHTET		1761.815200	no-P	0.000000	1763.175421	0.078892	0.000000	0.000000	9.336511	0.004172
Aurora B	282	297	FLVGMPPFDSPSHTET		1761.815200	no-P	3.000000	1766.543025	0.102343	3.367604	0.129221	9.345386	0.020023
Aurora B	282	297	FLVGMPPFDSPSHTET		1761.815200	no-P	10.000000	1766.814994	0.053910	3.639573	0.095552	9.328981	0.019542
Aurora B	282	297	FLVGMPPFDSPSHTET		1761.815200	no-P	30.000002	1766.971344	0.194205	3.795923	0.209618	9.348354	0.016452
Aurora B	282	297	FLVGMPPFDSPSHTET		1761.815200	no-P	90.000008	1766.999011	0.101388	3.823590	0.128466	9.362720	0.013274
Aurora B	282	305	FLVGMPPFDSPSHTETHRRIVNVD		2751.367100	all-P	0.000000	2753.430163	0.037490	0.000000	0.000000	8.652768	0.007569
Aurora B	282	305	FLVGMPPFDSPSHTETHRRIVNVD		2751.367100	all-P	3.000000	2756.851201	0.061747	3.421038	0.072237	8.620263	0.024590
Aurora B	282	305	FLVGMPPFDSPSHTETHRRIVNVD		2751.367100	all-P	10.000000	2758.364972	0.135605	4.934809	0.140692	8.613833	0.014266
Aurora B	282	305	FLVGMPPFDSPSHTETHRRIVNVD		2751.367100	all-P	30.000002	2759.748648	0.241208	6.318485	0.244104	8.666844	0.004475
Aurora B	282	305	FLVGMPPFDSPSHTETHRRIVNVD		2751.367100	all-P	90.000008	2760.446058	0.171674	7.015895	0.175720	8.648478	0.022356
Aurora B	282	305	FLVGMPPFDSPSHTETHRRIVNVD		2751.367100	no-P	0.000000	2753.430163	0.037490	0.000000	0.000000	8.652768	0.007569
Aurora B	282	305	FLVGMPPFDSPSHTETHRRIVNVD		2751.367100	no-P	3.000000	2758.469156	0.181020	5.038993	0.184861	8.631514	0.024165
Aurora B	282	305	FLVGMPPFDSPSHTETHRRIVNVD		2751.367100	no-P	10.000000	2759.796015	0.240070	6.365851	0.242980	8.627647	0.025473
Aurora B	282	305	FLVGMPPFDSPSHTETHRRIVNVD		2751.367100	no-P	30.000002	2760.328390	0.276589	6.898227	0.279118	8.651247	0.011050
Aurora B	282	305	FLVGMPPFDSPSHTETHRRIVNVD		2751.367100	no-P	90.000008	2760.440909	0.396343	7.010745	0.398112	8.652284	0.031834
Aurora B	283	297	LVGMPPFDSPSHTET		1614.746800	all-P	0.000000	1616.053049	0.077226	0.000000	0.000000	8.212586	0.008055
Aurora B	283	297	LVGMPPFDSPSHTET		1614.746800	all-P	3.000000	1619.518500	0.137147	3.465450	0.157395	8.199044	0.026306
Aurora B	283	297	LVGMPPFDSPSHTET		1614.746800	all-P	10.000000	1619.770740	0.107556	3.717691	0.132409	8.187216	0.016275
Aurora B	283	297	LVGMPPFDSPSHTET		1614.746800	all-P	30.000002	1620.033688	0.165569	3.980639	0.182694	8.220222	0.014691
Aurora B	283	297	LVGMPPFDSPSHTET		1614.746800	all-P	90.000008	1620.228918	0.111632	4.175868	0.135741	8.220611	0.022252
Aurora B	283	297	LVGMPPFDSPSHTET		1614.746800	no-P	0.000000	1616.053049	0.077226	0.000000	0.000000	8.212586	0.008055
Aurora B	283	297	LVGMPPFDSPSHTET		1614.746800	no-P	3.000000	1619.854547	0.105949	3.801498	0.131107	8.202922	0.017420
Aurora B	283	297	LVGMPPFDSPSHTET		1614.746800	no-P	10.000000	1620.188357	0.121733	4.135308	0.144162	8.200409	0.014798
Aurora B	283	297	LVGMPPFDSPSHTET		1614.746800	no-P	30.000002	1620.279696	0.128770	4.226647	0.150151	8.215535	0.018455
Aurora B	283	297	LVGMPPFDSPSHTET		1614.746800	no-P	90.000008	1620.307512	0.116980	4.254463	0.140172	8.222535	0.015119
Aurora B	283	305	LVGMPPFDSPSHTETHRRIVNVD		2604.298700	all-P	0.000000	2606.122854	0.117357	0.000000	0.000000	7.751840	0.003483
Aurora B	283	305	LVGMPPFDSPSHTETHRRIVNVD		2604.298700	all-P	3.000000	2610.236323	0.079391	4.113469	0.141689	7.747398	0.021009
Aurora B	283	305	LVGMPPFDSPSHTETHRRIVNVD		2604.298700	all-P	10.000000	2611.830529	0.152221	5.707675	0.192208	7.735353	0.013354
Aurora B	283	305	LVGMPPFDSPSHTETHRRIVNVD		2604.298700	all-P	30.000002	2613.324560	0.073309	7.201706	0.138372	7.763392	0.009665
Aurora B	283	305	LVGMPPFDSPSHTETHRRIVNVD		2604.298700	all-P	90.000008	2614.016964	0.084415	7.894110	0.144564	7.764892	0.021728
Aurora B	283	305	LVGMPPFDSPSHTETHRRIVNVD		2604.298700	no-P	0.000000	2606.122854	0.117357	0.000000	0.000000	7.751840	0.003483
Aurora B	283	305	LVGMPPFDSPSHTETHRRIVNVD		2604.298700	no-P	3.000000	2612.183456	0.030603	6.060601	0.121282	7.747256	0.001799
Aurora B	283	305	LVGMPPFDSPSHTETHRRIVNVD		2604.298700	no-P	10.000000	2613.556867	0.020668	7.434012	0.119163	7.741306	0.001322
Aurora B	283	305	LVGMPPFDSPSHTETHRRIVNVD		2604.298700	no-P	30.000002	2613.884405	0.101869	7.761551	0.155403	7.755641	0.006050
Aurora B	283	305	LVGMPPFDSPSHTETHRRIVNVD		2604.298700	no-P	90.000008	2614.166915	0.067010	8.044061	0.135141	7.768021	0.004504
Aurora B	284	297	VGMPPFDSPSHTET		1501.662800	all-P	0.000000	1502.996124	0.034419	0.000000	0.000000	7.495678	0.008542
Aurora B	284	297	VGMPPFDSPSHTET		1501.662800	all-P	3.000000	1506.631114	0.033928	3.634990	0.048330	7.488214	0.018658
Aurora B	284	297	VGMPPFDSPSHTET		1501.662800	all-P	10.000000	1506.864087	0.015272	3.867963	0.037655	7.477222	0.020566
Aurora B	284	297	VGMPPFDSPSHTET		1501.662800	all-P	30.000002	1507.152188	0.006974	4.156064	0.035119	7.500495	0.018506
Aurora B	284	297	VGMPPFDSPSHTET		1501.662800	all-P	90.000008	1507.297894	0.066527	4.301770	0.074903	7.508290	0.017804
Aurora B	284	297	VGMPPFDSPSHTET		1501.662800	no-P	0.000000	1502.996124	0.034419	0.000000	0.000000	7.495678	0.008542
Aurora B	284	297	VGMPPFDSPSHTET		1501.662800	no-P	3.000000	1506.931607	0.036408	3.935483	0.050102	7.490672	0.015028
Aurora B	284	297	VGMPPFDSPSHTET		1501.662800	no-P	10.000000	1507.298260	0.038530	4.302136	0.051665	7.485093	0.019841
Aurora B	284	297	VGMPPFDSPSHTET		1501.662800	no-P	30.000002	1507.377137	0.021818	4.381013	0.040752	7.499869	0.011830
Aurora B	284	297	VGMPPFDSPSHTET		1501.662800	no-P	90.000008	1507.426664	0.083075	4.430540	0.089923	7.507269	0.000717
Aurora B	284	305	VGMPPFDSPSHTETHRRIVNVD		2491.214700	all-P	0.000000	2493.171994	0.226060	0.000000	0.000000	7.251841	0.011954
Aurora B	284	305	VGMPPFDSPSHTETHRRIVNVD		2491.214700	all-P	3.000000	2497.084866	0.145616	3.912872	0.268900	7.248940	0.019393
Aurora B	284	305	VGMPPFDSPSHTETHRRIVNVD		2491.214700	all-P	10.000000	2498.459946	0.180309	5.287952	0.289162	7.232394	0.004954
Aurora B	284	305	VGMPPFDSPSHTETHRRIVNVD		2491.214700	all-P	30.000002	2499.992542	0.297147	6.820548	0.373363	7.264349	0.022363
Aurora B	284	305	VGMPPFDSPSHTETHRRIVNVD		2491.214700	no-P	0.000000	2493.171994	0.226060	0.000000	0.000000	7.251841	0.011954
Aurora B	284	305	VGMPPFDSPSHTETHRRIVNVD		2491.214700	no-P	3.000000	2498.656953	0.365387	5.484960	0.429664	7.244499	0.007068
Aurora B	284	305	VGMPPFDSPSHTETHRRIVNVD		2491.214700	no-P	10.000000	2499.875118	0.380027	6.703125	0.442181	7.256793	0.027736
Aurora B	284	305	VGMPPFDSPSHTETHRRIVNVD		2491.214700	no-P	30.000002	2500.551986	0.336792	7.379993	0.405625	7.262593	0.015443
Aurora B	284	305	VGMPPFDSPSHTETHRRIVNVD		2491.214700	no-P	90.000008	2500.738540	0.343824	7.566547	0.411483	7.271859	0.010554
Aurora B	287	305	PPFDSPSHTETHRRIVNVD		2204.084300	all-P	0.000000	2205.210053	0.020611	0.000000	0.000000	7.744072	0.001747
Aurora B	287	305	PPFDSPSHTETHRRIVNVD		2204.084300	all-P	3.000000	2209.203697	0.152442	3.993644	0.153829	7.748310	0.020228
Aurora B	287	305	PPFDSPSHTETHRRIVNVD		2204.084300	all-P	10.000000	2211.034814	0.118322	5.824761	0.120103	7.732062	0.020035
Aurora B	287	305	PPFDSPSHTETHRRIVNVD		2204.084300	all-P	30.000002	2212.472597	0.216593	7.262544	0.217572	7.757983	0.016605
Aurora B	287	305	PPFDSPSHTETHRRIVNVD		2204.084300	all-P	90.000008	2213.294525	0.285387	8.084472	0.286131	7.770998	0.004932
Aurora B	287	305	PPFDSPSHTETHRRIVNVD		2204.084300	no-P	0.000000	2205.210053	0.020611	0.000000	0.000000	7.744072	0.001747
Aurora B	287	305	PPFDSPSHTETHRRIVNVD		2204.084300	no-P	3.000000	2211.031596	0.070195	5.821543	0.073159	7.750820	0.021928
Aurora B	287	305	PPFDSPSHTETHRRIVNVD		2204.084300	no-P	10.000000	2212.469373	0.126488	7.259319	0.128156	7.747872	0.023334
Aurora B	287	305	PPFDSPSHTETHRRIVNVD		2204.084300	no-P	30.000002	2213.020346	0.049917	7.810293	0.054005	7.764366	0.012473
Aurora B	287	305	PPFDSPSHTETHRRIVNVD		2204.084300	no-P	90.000008	2213.057731	0.328490	7.847678	0.329136	7.770921	0.015088
Aurora B	291	295	SPSHT		528.241300	all-P	0.000000	528.449779	0.028071	0.000000	0.000000	5.849291	0.005415
Aurora B	291	295	SPSHT		528.241300	all-P	3.000000	530.459782	0.055157	2.010003	0.061889	5.838470	0.014564
Aurora B	291	295	SPSHT		528.241300	all-P	10.000000	530.472579	0.039495	2.022800	0.048455	5.828838	0.011968
Aurora B	291	295	SPSHT		528.241300	all-P	30.000002	530.458133	0.068278	2.008355	0.073823	5.834012	0.011956
Aurora B	291	295	SPSHT		528.241300	all-P	90.000008	530.437557	0.085278	1.987778	0.089780	5.850403	0.010133
Aurora B	291	295	SPSHT		528.241300	no-P	0.000000	528.449779	0.028071	0.000000	0.000000	5.849291	0.005415
Aurora B	291	295	SPSHT		528.241300	no-P	3.000000	530.390183	0.092636	1.940404	0.096795	5.838975	0.010693
Aurora B	291	295	SPSHT		528.241300	no-P	10.000000	530.471255	0.077946	2.021476	0.082846	5.835238	0.011439
Aurora B	291	295	SPSHT		528.241300	no-P	30.000002	530.367288	0.063722	1.917509	0.069631	5.847570	0.012283
Aurora B	291	295	SPSHT		528.241300	no-P	90.000008	530.447092	0.091301	1.997313	0.095519	5.842878	0.001498
Aurora B	298	305	HRRIVNVD		1008.569700	all-P	0.000000	1009.718234	0.217721	0.000000	0.000000	5.564968	0.012367
Aurora B	298	305	HRRIVNVD		1008.569700	all-P	3.000000	1010.985700	0.107553	1.267466	0.242838	5.569342	0.010078
Aurora B	298	305	HRRIVNVD		1008.569700	all-P	10.000000	1012.100284	0.060903	2.382050	0.226079	5.560188	0.009428
Aurora B	298	305	HRRIVNVD		1008.569700	all-P	30.000002	1012.952197	0.074384	3.233962	0.230077	5.573946	0.022417
Aurora B	298	305	HRRIVNVD		1008.569700	all-P	90.000008	1013.341460	0.080464	3.623226	0.232114	5.579167	0.024329
Aurora B	298	305	HRRIVNVD		1008.569700	no-P	0.000000	1009.718234	0.217721	0.000000	0.000000	5.564968	0.012367
Aurora B	298	305	HRRIVNVD		1008.569700	no-P	3.000000	1012.008502	0.050402	2.290268	0.223479	5.570948	0.007849
Aurora B	298	305	HRRIVNVD		1008.569700	no-P	10.000000	1012.978623	0.062100	3.260388	0.226405	5.564639	0.011759
Aurora B	298	305	HRRIVNVD		1008.569700	no-P	30.000002	1013.291566	0.101657	3.573332	0.240285	5.575765	0.022255
Aurora B	298	305	HRRIVNVD		1008.569700	no-P	90.000008	1013.401286	0.116885	3.683051	0.247113	5.580297	0.012203
Aurora B	304	314	VDLKFPPFLSD		1277.677600	all-P	0.000000	1278.434077	0.056223	0.000000	0.000000	10.295174	0.003361
Aurora B	304	314	VDLKFPPFLSD		1277.677600	all-P	3.000000	1282.391229	0.036125	3.957152	0.066828	10.275466	0.029986
Aurora B	304	314	VDLKFPPFLSD		1277.677600	all-P	10.000000	1282.540221	0.003478	4.106144	0.056330	10.264056	0.032828
Aurora B	304	314	VDLKFPPFLSD		1277.677600	all-P	30.000002	1282.864663	0.076000	4.430586	0.094535	10.304830	0.007459
Aurora B	304	314	VDLKFPPFLSD		1277.677600	all-P	90.000008	1283.001343	0.062889	4.567267	0.084356	10.314937	0.014870
Aurora B	304	314	VDLKFPPFLSD		1277.677600	no-P	0.000000	1278.434077	0.056223	0.000000	0.000000	10.295174	0.003361
Aurora B	304	314	VDLKFPPFLSD		1277.677600	no-P	3.000000	1282.498530	0.041119	4.064453	0.069654	10.276099	0.025207
Aurora B	304	314	VDLKFPPFLSD		1277.677600	no-P	10.000000	1282.720837	0.082654	4.286760	0.099964	10.272422	0.019914
Aurora B	304	314	VDLKFPPFLSD		1277.677600	no-P	30.000002	1283.078249	0.058283	4.644172	0.080981	10.295344	0.010975
Aurora B	304	314	VDLKFPPFLSD		1277.677600	no-P	90.000008	1283.222817	0.044163	4.788740	0.071494	10.299240	0.009127
Aurora B	304	318	VDLKFPPFLSDGSKD		1664.853000	all-P	0.000000	1665.905894	0.055833	0.000000	0.000000	9.438539	0.015167
Aurora B	304	318	VDLKFPPFLSDGSKD		1664.853000	all-P	3.000000	1670.530187	0.073484	4.624293	0.092289	9.421538	0.021191
Aurora B	304	318	VDLKFPPFLSDGSKD		1664.853000	all-P	10.000000	1670.760124	0.072809	4.854229	0.091752	9.409379	0.017001
Aurora B	304	318	VDLKFPPFLSDGSKD		1664.853000	all-P	30.000002	1671.034338	0.058297	5.128443	0.080721	9.439530	0.015997
Aurora B	304	318	VDLKFPPFLSDGSKD		1664.853000	all-P	90.000008	1671.358062	0.102903	5.452168	0.117074	9.446267	0.021977
Aurora B	304	318	VDLKFPPFLSDGSKD		1664.853000	no-P	0.000000	1665.905894	0.055833	0.000000	0.000000	9.438539	0.015167
Aurora B	304	318	VDLKFPPFLSDGSKD		1664.853000	no-P	3.000000	1670.719433	0.043152	4.813538	0.070565	9.427310	0.016275
Aurora B	304	318	VDLKFPPFLSDGSKD		1664.853000	no-P	10.000000	1670.932166	0.037253	5.026272	0.067120	9.423358	0.021865
Aurora B	304	318	VDLKFPPFLSDGSKD		1664.853000	no-P	30.000002	1671.262709	0.089976	5.356815	0.105891	9.442157	0.014028
Aurora B	304	318	VDLKFPPFLSDGSKD		1664.853000	no-P	90.000008	1671.519729	0.086097	5.613834	0.102616	9.446844	0.009814
Aurora B	304	319	VDLKFPPFLSDGSKDL		1777.937100	all-P	0.000000	1778.939577	0.028673	0.000000	0.000000	9.969006	0.007096
Aurora B	304	319	VDLKFPPFLSDGSKDL		1777.937100	all-P	3.000000	1783.866656	0.058630	4.927079	0.065266	9.958651	0.028919
Aurora B	304	319	VDLKFPPFLSDGSKDL		1777.937100	all-P	10.000000	1784.105417	0.042005	5.165840	0.050858	9.940524	0.025977
Aurora B	304	319	VDLKFPPFLSDGSKDL		1777.937100	all-P	30.000002	1784.318736	0.091457	5.379158	0.095846	9.976542	0.015841
Aurora B	304	319	VDLKFPPFLSDGSKDL		1777.937100	all-P	90.000008	1784.731115	0.097591	5.791537	0.101716	9.987044	0.018403
Aurora B	304	319	VDLKFPPFLSDGSKDL		1777.937100	no-P	0.000000	1778.939577	0.028673	0.000000	0.000000	9.969006	0.007096
Aurora B	304	319	VDLKFPPFLSDGSKDL		1777.937100	no-P	3.000000	1784.069569	0.141708	5.129991	0.144580	9.958598	0.021658
Aurora B	304	319	VDLKFPPFLSDGSKDL		1777.937100	no-P	10.000000	1784.267771	0.144147	5.328194	0.146971	9.953562	0.022480
Aurora B	304	319	VDLKFPPFLSDGSKDL		1777.937100	no-P	30.000002	1784.528472	0.065978	5.588894	0.071939	9.976145	0.015494
Aurora B	304	319	VDLKFPPFLSDGSKDL		1777.937100	no-P	90.000008	1784.794119	0.125048	5.854542	0.128293	9.989491	0.011059
Aurora B	304	323	VDLKFPPFLSDGSKDLISKL		2219.232200	all-P	0.000000	2220.671807	0.105859	0.000000	0.000000	10.464154	0.007741
Aurora B	304	323	VDLKFPPFLSDGSKDLISKL		2219.232200	all-P	3.000000	2225.307903	0.062236	4.636096	0.122798	10.424745	0.024063
Aurora B	304	323	VDLKFPPFLSDGSKDLISKL		2219.232200	all-P	10.000000	2225.511733	0.172076	4.839926	0.202030	10.408476	0.015939
Aurora B	304	323	VDLKFPPFLSDGSKDLISKL		2219.232200	all-P	30.000002	2225.681359	0.090717	5.009552	0.139412	10.447806	0.014611
Aurora B	304	323	VDLKFPPFLSDGSKDLISKL		2219.232200	all-P	90.000008	2226.095800	0.112707	5.423993	0.154625	10.455445	0.017848
Aurora B	304	323	VDLKFPPFLSDGSKDLISKL		2219.232200	no-P	0.000000	2220.671807	0.105859	0.000000	0.000000	10.464154	0.007741
Aurora B	304	323	VDLKFPPFLSDGSKDLISKL		2219.232200	no-P	3.000000	2225.498873	0.085884	4.827066	0.136316	10.427788	0.024472
Aurora B	304	323	VDLKFPPFLSDGSKDLISKL		2219.232200	no-P	10.000000	2225.834287	0.092240	5.162480	0.140407	10.421725	0.024926
Aurora B	304	323	VDLKFPPFLSDGSKDLISKL		2219.232200	no-P	30.000002	2226.076427	0.125161	5.404620	0.163925	10.441392	0.025745
Aurora B	304	323	VDLKFPPFLSDGSKDLISKL		2219.232200	no-P	90.000008	2226.350872	0.095012	5.679065	0.142244	10.453072	0.007566
Aurora B	305	314	DLKFPPFLSD		1178.609200	all-P	0.000000	1179.280361	0.028152	0.000000	0.000000	10.198393	0.002346
Aurora B	305	314	DLKFPPFLSD		1178.609200	all-P	3.000000	1183.350104	0.028243	4.069743	0.039877	10.180052	0.022911
Aurora B	305	314	DLKFPPFLSD		1178.609200	all-P	10.000000	1183.464067	0.005939	4.183706	0.028771	10.180320	0.019298
Aurora B	305	314	DLKFPPFLSD		1178.609200	all-P	30.000002	1183.442357	0.410424	4.161996	0.411388	10.206329	0.012036
Aurora B	305	314	DLKFPPFLSD		1178.609200	all-P	90.000008	1183.536818	0.018461	4.256457	0.033665	10.218456	0.017792
Aurora B	305	314	DLKFPPFLSD		1178.609200	no-P	0.000000	1179.280361	0.028152	0.000000	0.000000	10.198393	0.002346
Aurora B	305	314	DLKFPPFLSD		1178.609200	no-P	3.000000	1183.188857	0.396229	3.908496	0.397228	10.185285	0.011767
Aurora B	305	314	DLKFPPFLSD		1178.609200	no-P	10.000000	1183.319500	0.055760	4.039139	0.062464	10.192441	0.030372
Aurora B	305	314	DLKFPPFLSD		1178.609200	no-P	30.000002	1183.522321	0.065877	4.241960	0.071640	10.205495	0.011243
Aurora B	305	314	DLKFPPFLSD		1178.609200	no-P	90.000008	1183.534565	0.042197	4.254204	0.050725	10.226869	0.009477
Aurora B	305	318	DLKFPPFLSDGSKD		1565.784600	all-P	0.000000	1566.795570	0.040086	0.000000	0.000000	9.340969	0.005579
Aurora B	305	318	DLKFPPFLSDGSKD		1565.784600	all-P	3.000000	1571.386939	0.087179	4.591370	0.095953	9.323103	0.018732
Aurora B	305	318	DLKFPPFLSDGSKD		1565.784600	all-P	10.000000	1571.498349	0.058431	4.702779	0.070859	9.317935	0.022199
Aurora B	305	318	DLKFPPFLSDGSKD		1565.784600	all-P	30.000002	1571.553337	0.076213	4.757767	0.086113	9.348805	0.016554
Aurora B	305	318	DLKFPPFLSDGSKD		1565.784600	all-P	90.000008	1571.591388	0.081399	4.795818	0.090734	9.361252	0.015717
Aurora B	305	318	DLKFPPFLSDGSKD		1565.784600	no-P	0.000000	1566.795570	0.040086	0.000000	0.000000	9.340969	0.005579
Aurora B	305	318	DLKFPPFLSDGSKD		1565.784600	no-P	3.000000	1571.386273	0.364992	4.590704	0.367187	9.342069	0.023213
Aurora B	305	318	DLKFPPFLSDGSKD		1565.784600	no-P	10.000000	1571.521222	0.123604	4.725652	0.129942	9.329613	0.023431
Aurora B	305	318	DLKFPPFLSDGSKD		1565.784600	no-P	30.000002	1571.577284	0.092176	4.781714	0.100515	9.348669	0.016940
Aurora B	305	318	DLKFPPFLSDGSKD		1565.784600	no-P	90.000008	1571.659220	0.102939	4.863651	0.110468	9.344007	0.009912
Aurora B	305	323	DLKFPPFLSDGSKDLISKL		2120.163800	all-P	0.000000	2121.484545	0.105170	0.000000	0.000000	10.434206	0.019434
Aurora B	305	323	DLKFPPFLSDGSKDLISKL		2120.163800	all-P	3.000000	2126.139607	0.126974	4.655062	0.164873	10.405106	0.027845
Aurora B	305	323	DLKFPPFLSDGSKDLISKL		2120.163800	all-P	10.000000	2126.194199	0.124355	4.709654	0.162864	10.394429	0.024100
Aurora B	305	323	DLKFPPFLSDGSKDLISKL		2120.163800	all-P	30.000002	2126.276253	0.121553	4.791708	0.160735	10.427386	0.015476
Aurora B	305	323	DLKFPPFLSDGSKDLISKL		2120.163800	all-P	90.000008	2126.417897	0.066695	4.933352	0.124535	10.434426	0.012011
Aurora B	305	323	DLKFPPFLSDGSKDLISKL		2120.163800	no-P	0.000000	2121.484545	0.105170	0.000000	0.000000	10.434206	0.019434
Aurora B	305	323	DLKFPPFLSDGSKDLISKL		2120.163800	no-P	3.000000	2126.263389	0.127328	4.778845	0.165146	10.407434	0.022617
Aurora B	305	323	DLKFPPFLSDGSKDLISKL		2120.163800	no-P	10.000000	2126.352518	0.144760	4.867974	0.178931	10.401242	0.022627
Aurora B	305	323	DLKFPPFLSDGSKDLISKL		2120.163800	no-P	30.000002	2126.471761	0.138087	4.987217	0.173576	10.415563	0.018095
Aurora B	305	323	DLKFPPFLSDGSKDLISKL		2120.163800	no-P	90.000008	2126.687606	0.469947	5.203062	0.481571	10.427133	0.019005
Aurora B	306	311	LKFPPF		748.439200	all-P	0.000000	748.859538	0.037634	0.000000	0.000000	9.775457	0.003450
Aurora B	306	311	LKFPPF		748.439200	all-P	3.000000	750.500308	0.056111	1.640770	0.067563	9.783363	0.028610
Aurora B	306	311	LKFPPF		748.439200	all-P	10.000000	750.461128	0.077434	1.601590	0.086094	9.770026	0.027103
Aurora B	306	311	LKFPPF		748.439200	all-P	30.000002	750.510202	0.031066	1.650664	0.048800	9.804143	0.011463
Aurora B	306	311	LKFPPF		748.439200	all-P	90.000008	750.571517	0.046817	1.711979	0.060068	9.812874	0.015553
Aurora B	306	311	LKFPPF		748.439200	no-P	0.000000	748.859538	0.037634	0.000000	0.000000	9.775457	0.003450
Aurora B	306	311	LKFPPF		748.439200	no-P	3.000000	750.423038	0.071510	1.563500	0.080808	9.786383	0.017281
Aurora B	306	311	LKFPPF		748.439200	no-P	10.000000	750.489032	0.050325	1.629494	0.062840	9.776721	0.024714
Aurora B	306	311	LKFPPF		748.439200	no-P	30.000002	750.509054	0.029597	1.649516	0.047878	9.795698	0.017004
Aurora B	306	311	LKFPPF		748.439200	no-P	90.000008	750.606393	0.023980	1.746855	0.044624	9.809843	0.022026
Aurora B	306	312	LKFPPFL		861.523300	all-P	0.000000	862.205062	0.072337	0.000000	0.000000	10.804141	0.015809
Aurora B	306	312	LKFPPFL		861.523300	all-P	3.000000	864.516840	0.029356	2.311778	0.078067	10.791828	0.024489
Aurora B	306	312	LKFPPFL		861.523300	all-P	10.000000	864.548624	0.037200	2.343562	0.081342	10.784566	0.020764
Aurora B	306	312	LKFPPFL		861.523300	all-P	30.000002	864.520433	0.039104	2.315371	0.082230	10.823689	0.017662
Aurora B	306	312	LKFPPFL		861.523300	all-P	90.000008	864.506736	0.030787	2.301674	0.078616	10.826241	0.022543
Aurora B	306	312	LKFPPFL		861.523300	no-P	0.000000	862.205062	0.072337	0.000000	0.000000	10.804141	0.015809
Aurora B	306	312	LKFPPFL		861.523300	no-P	3.000000	864.520054	0.046933	2.314992	0.086229	10.801884	0.020825
Aurora B	306	312	LKFPPFL		861.523300	no-P	10.000000	864.504255	0.037551	2.299193	0.081503	10.789923	0.028255
Aurora B	306	312	LKFPPFL		861.523300	no-P	30.000002	864.528979	0.023655	2.323917	0.076107	10.819788	0.020092
Aurora B	306	312	LKFPPFL		861.523300	no-P	90.000008	864.532251	0.035471	2.327189	0.080566	10.830593	0.006219
Aurora B	306	314	LKFPPFLSD		1063.582300	all-P	0.000000	1064.647130	0.130979	0.000000	0.000000	10.048879	0.008964
Aurora B	306	314	LKFPPFLSD		1063.582300	all-P	3.000000	1067.878384	0.047700	3.231253	0.139394	10.104638	0.080912
Aurora B	306	314	LKFPPFLSD		1063.582300	all-P	10.000000	1067.918443	0.017844	3.271313	0.132188	10.124053	0.101422
Aurora B	306	314	LKFPPFLSD		1063.582300	all-P	30.000002	1067.964726	0.035250	3.317596	0.135639	10.060791	0.012222
Aurora B	306	314	LKFPPFLSD		1063.582300	all-P	90.000008	1067.973104	0.072931	3.325974	0.149914	10.071033	0.030493
Aurora B	306	314	LKFPPFLSD		1063.582300	no-P	0.000000	1064.647130	0.130979	0.000000	0.000000	10.048879	0.008964
Aurora B	306	314	LKFPPFLSD		1063.582300	no-P	3.000000	1067.816327	0.081363	3.169197	0.154193	10.023957	0.018689
Aurora B	306	314	LKFPPFLSD		1063.582300	no-P	10.000000	1067.926957	0.053522	3.279827	0.141492	10.021727	0.025334
Aurora B	306	314	LKFPPFLSD		1063.582300	no-P	30.000002	1067.948177	0.061398	3.301047	0.144655	10.055865	0.018867
Aurora B	306	314	LKFPPFLSD		1063.582300	no-P	90.000008	1067.971760	0.073433	3.324630	0.150159	10.057262	0.006155
Aurora B	306	315	LKFPPFLSDG		1120.603700	all-P	0.000000	1121.252741	0.040648	0.000000	0.000000	10.007182	0.009973
Aurora B	306	315	LKFPPFLSDG		1120.603700	all-P	3.000000	1125.413318	0.085843	4.160577	0.094980	9.981553	0.023242
Aurora B	306	315	LKFPPFLSDG		1120.603700	all-P	10.000000	1125.319369	0.013748	4.066628	0.042910	9.963485	0.018707
Aurora B	306	315	LKFPPFLSDG		1120.603700	all-P	30.000002	1125.493031	0.018977	4.240291	0.044860	9.998733	0.005189
Aurora B	306	315	LKFPPFLSDG		1120.603700	all-P	90.000008	1125.435985	0.073329	4.183244	0.083842	10.001134	0.015839
Aurora B	306	315	LKFPPFLSDG		1120.603700	no-P	0.000000	1121.252741	0.040648	0.000000	0.000000	10.007182	0.009973
Aurora B	306	315	LKFPPFLSDG		1120.603700	no-P	3.000000	1125.320146	0.082207	4.067405	0.091707	9.982415	0.014960
Aurora B	306	315	LKFPPFLSDG		1120.603700	no-P	10.000000	1125.389616	0.065769	4.136875	0.077316	9.973624	0.028376
Aurora B	306	315	LKFPPFLSDG		1120.603700	no-P	30.000002	1125.589400	0.135789	4.336660	0.141742	10.002989	0.017584
Aurora B	306	315	LKFPPFLSDG		1120.603700	no-P	90.000008	1125.534016	0.089003	4.281275	0.097846	10.005194	0.006308
Aurora B	306	318	LKFPPFLSDGSKD		1450.757700	all-P	0.000000	1452.094261	0.227145	0.000000	0.000000	9.377897	0.229183
Aurora B	306	318	LKFPPFLSDGSKD		1450.757700	all-P	3.000000	1455.762965	0.085872	3.668704	0.242835	9.219032	0.069790
Aurora B	306	318	LKFPPFLSDGSKD		1450.757700	all-P	10.000000	1455.735691	0.067378	3.641430	0.236927	9.575356	0.013085
Aurora B	306	318	LKFPPFLSDGSKD		1450.757700	all-P	30.000002	1455.876761	0.209626	3.782500	0.309092	9.231580	0.079296
Aurora B	306	318	LKFPPFLSDGSKD		1450.757700	all-P	90.000008	1455.989407	0.046861	3.895146	0.231928	9.166469	0.024698
Aurora B	306	318	LKFPPFLSDGSKD		1450.757700	no-P	0.000000	1452.094261	0.227145	0.000000	0.000000	9.377897	0.229183
Aurora B	306	318	LKFPPFLSDGSKD		1450.757700	no-P	3.000000	1456.035897	0.362517	3.941636	0.427801	9.199162	0.071384
Aurora B	306	318	LKFPPFLSDGSKD		1450.757700	no-P	10.000000	1455.844898	0.039803	3.750637	0.230606	9.225627	0.109269
Aurora B	306	318	LKFPPFLSDGSKD		1450.757700	no-P	30.000002	1456.117392	0.390597	4.023131	0.451842	9.167759	0.020476
Aurora B	306	318	LKFPPFLSDGSKD		1450.757700	no-P	90.000008	1455.999042	0.038309	3.904781	0.230353	9.176493	0.104711
Aurora B	306	319	LKFPPFLSDGSKDL		1563.841700	all-P	0.000000	1565.162163	0.038274	0.000000	0.000000	9.740844	0.012893
Aurora B	306	319	LKFPPFLSDGSKDL		1563.841700	all-P	3.000000	1569.161734	0.072950	3.999571	0.082381	9.741965	0.025092
Aurora B	306	319	LKFPPFLSDGSKDL		1563.841700	all-P	10.000000	1569.187025	0.067363	4.024861	0.077476	9.723437	0.020155
Aurora B	306	319	LKFPPFLSDGSKDL		1563.841700	all-P	30.000002	1569.247517	0.042312	4.085354	0.057055	9.750968	0.017821
Aurora B	306	319	LKFPPFLSDGSKDL		1563.841700	all-P	90.000008	1569.359350	0.053831	4.197187	0.066051	9.756014	0.017104
Aurora B	306	319	LKFPPFLSDGSKDL		1563.841700	no-P	0.000000	1565.162163	0.038274	0.000000	0.000000	9.740844	0.012893
Aurora B	306	319	LKFPPFLSDGSKDL		1563.841700	no-P	3.000000	1569.211216	0.068642	4.049053	0.078592	9.740741	0.022323
Aurora B	306	319	LKFPPFLSDGSKDL		1563.841700	no-P	10.000000	1569.212657	0.052935	4.050494	0.065322	9.732021	0.023245
Aurora B	306	319	LKFPPFLSDGSKDL		1563.841700	no-P	30.000002	1569.286213	0.053957	4.124050	0.066153	9.748142	0.016624
Aurora B	306	319	LKFPPFLSDGSKDL		1563.841700	no-P	90.000008	1569.408753	0.049128	4.246590	0.062277	9.762555	0.021518
Aurora B	306	323	LKFPPFLSDGSKDLISKL		2005.136800	all-P	0.000000	2006.598404	0.027109	0.000000	0.000000	10.289612	0.002772
Aurora B	306	323	LKFPPFLSDGSKDLISKL		2005.136800	all-P	3.000000	2010.508927	0.091967	3.910523	0.095879	10.263825	0.029218
Aurora B	306	323	LKFPPFLSDGSKDLISKL		2005.136800	all-P	10.000000	2010.510373	0.141855	3.911969	0.144422	10.251286	0.025770
Aurora B	306	323	LKFPPFLSDGSKDLISKL		2005.136800	all-P	30.000002	2010.708978	0.041829	4.110574	0.049845	10.291982	0.014227
Aurora B	306	323	LKFPPFLSDGSKDLISKL		2005.136800	all-P	90.000008	2010.804312	0.053126	4.205908	0.059643	10.312826	0.001877
Aurora B	306	323	LKFPPFLSDGSKDLISKL		2005.136800	no-P	0.000000	2006.598404	0.027109	0.000000	0.000000	10.289612	0.002772
Aurora B	306	323	LKFPPFLSDGSKDLISKL		2005.136800	no-P	3.000000	2010.632165	0.163460	4.033761	0.165693	10.269276	0.021250
Aurora B	306	323	LKFPPFLSDGSKDLISKL		2005.136800	no-P	10.000000	2010.718257	0.121275	4.119853	0.124268	10.265963	0.022835
Aurora B	306	323	LKFPPFLSDGSKDLISKL		2005.136800	no-P	30.000002	2010.894543	0.035854	4.296138	0.044948	10.294175	0.019197
Aurora B	306	323	LKFPPFLSDGSKDLISKL		2005.136800	no-P	90.000008	2011.035701	0.025372	4.437296	0.037130	10.282948	0.011854
Aurora B	308	314	FPPFLSD		822.403200	all-P	0.000000	822.752276	0.074865	0.000000	0.000000	10.042073	0.009022
Aurora B	308	314	FPPFLSD		822.403200	all-P	3.000000	825.043808	0.162116	2.291533	0.178567	10.022225	0.024719
Aurora B	308	314	FPPFLSD		822.403200	all-P	10.000000	824.887134	0.083632	2.134858	0.112246	10.012775	0.020107
Aurora B	308	314	FPPFLSD		822.403200	all-P	30.000002	824.880806	0.158404	2.128530	0.175204	10.051836	0.013202
Aurora B	308	314	FPPFLSD		822.403200	all-P	90.000008	824.772772	0.252561	2.020496	0.263423	10.057780	0.025696
Aurora B	308	314	FPPFLSD		822.403200	no-P	0.000000	822.752276	0.074865	0.000000	0.000000	10.042073	0.009022
Aurora B	308	314	FPPFLSD		822.403200	no-P	3.000000	825.010925	0.009140	2.258649	0.075421	10.027307	0.016517
Aurora B	308	314	FPPFLSD		822.403200	no-P	10.000000	825.141425	0.222212	2.389150	0.234484	10.020894	0.022014
Aurora B	308	314	FPPFLSD		822.403200	no-P	30.000002	825.053115	0.131556	2.300839	0.151366	10.045925	0.015737
Aurora B	308	314	FPPFLSD		822.403200	no-P	90.000008	825.214058	0.217628	2.461782	0.230145	10.058479	0.009183
Aurora B	308	318	FPPFLSDGSKD		1209.578600	all-P	0.000000	1210.319619	0.073496	0.000000	0.000000	9.144932	0.001614
Aurora B	308	318	FPPFLSDGSKD		1209.578600	all-P	3.000000	1213.102901	0.122027	2.783282	0.142451	9.138821	0.027370
Aurora B	308	318	FPPFLSDGSKD		1209.578600	all-P	10.000000	1213.082498	0.157239	2.762878	0.173568	9.127761	0.024057
Aurora B	308	318	FPPFLSDGSKD		1209.578600	all-P	30.000002	1213.219581	0.138750	2.899962	0.157013	9.157966	0.012433
Aurora B	308	318	FPPFLSDGSKD		1209.578600	all-P	90.000008	1213.207118	0.178284	2.887499	0.192839	9.165237	0.021686
Aurora B	308	318	FPPFLSDGSKD		1209.578600	no-P	0.000000	1210.319619	0.073496	0.000000	0.000000	9.144932	0.001614
Aurora B	308	318	FPPFLSDGSKD		1209.578600	no-P	3.000000	1213.167386	0.113309	2.847767	0.135058	9.137113	0.017703
Aurora B	308	318	FPPFLSDGSKD		1209.578600	no-P	10.000000	1213.155439	0.086718	2.835820	0.113673	9.131562	0.023073
Aurora B	308	318	FPPFLSDGSKD		1209.578600	no-P	30.000002	1213.181433	0.110946	2.861814	0.133081	9.161022	0.013105
Aurora B	308	318	FPPFLSDGSKD		1209.578600	no-P	90.000008	1213.320519	0.148066	3.000899	0.165303	9.163239	0.009416
Aurora B	308	323	FPPFLSDGSKDLISKL		1763.957800	all-P	0.000000	1764.890816	0.108655	0.000000	0.000000	10.286323	0.006164
Aurora B	308	323	FPPFLSDGSKDLISKL		1763.957800	all-P	3.000000	1768.492093	0.083479	3.601277	0.137020	10.259607	0.028990
Aurora B	308	323	FPPFLSDGSKDLISKL		1763.957800	all-P	10.000000	1768.428579	0.065729	3.537764	0.126989	10.246918	0.022880
Aurora B	308	323	FPPFLSDGSKDLISKL		1763.957800	all-P	30.000002	1768.338882	0.196658	3.448066	0.224678	10.282512	0.012561
Aurora B	308	323	FPPFLSDGSKDLISKL		1763.957800	all-P	90.000008	1768.347677	0.139992	3.456861	0.177211	10.296967	0.020021
Aurora B	308	323	FPPFLSDGSKDLISKL		1763.957800	no-P	0.000000	1764.890816	0.108655	0.000000	0.000000	10.286323	0.006164
Aurora B	308	323	FPPFLSDGSKDLISKL		1763.957800	no-P	3.000000	1768.477886	0.091392	3.587070	0.141980	10.260780	0.020725
Aurora B	308	323	FPPFLSDGSKDLISKL		1763.957800	no-P	10.000000	1768.566659	0.137163	3.675843	0.174984	10.263527	0.023260
Aurora B	308	323	FPPFLSDGSKDLISKL		1763.957800	no-P	30.000002	1768.381689	0.149143	3.490873	0.184525	10.286333	0.013271
Aurora B	308	323	FPPFLSDGSKDLISKL		1763.957800	no-P	90.000008	1768.574614	0.117341	3.683798	0.159921	10.286498	0.009650
Aurora B	309	323	PPFLSDGSKDLISKL		1616.889400	all-P	0.000000	1617.798043	0.029199	0.000000	0.000000	10.293266	0.002399
Aurora B	309	323	PPFLSDGSKDLISKL		1616.889400	all-P	3.000000	1620.462062	0.099856	2.664019	0.104038	10.262507	0.027016
Aurora B	309	323	PPFLSDGSKDLISKL		1616.889400	all-P	10.000000	1620.460098	0.018606	2.662055	0.034623	10.244066	0.014476
Aurora B	309	323	PPFLSDGSKDLISKL		1616.889400	all-P	30.000002	1620.453855	0.108277	2.655811	0.112145	10.282944	0.011699
Aurora B	309	323	PPFLSDGSKDLISKL		1616.889400	all-P	90.000008	1620.451691	0.094468	2.653648	0.098877	10.301720	0.017092
Aurora B	309	323	PPFLSDGSKDLISKL		1616.889400	no-P	0.000000	1617.798043	0.029199	0.000000	0.000000	10.293266	0.002399
Aurora B	309	323	PPFLSDGSKDLISKL		1616.889400	no-P	3.000000	1620.616386	0.022589	2.818343	0.036917	10.264688	0.028157
Aurora B	309	323	PPFLSDGSKDLISKL		1616.889400	no-P	10.000000	1620.593876	0.040196	2.795833	0.049682	10.258817	0.024641
Aurora B	309	323	PPFLSDGSKDLISKL		1616.889400	no-P	30.000002	1620.512482	0.108097	2.714439	0.111971	10.288094	0.019058
Aurora B	309	323	PPFLSDGSKDLISKL		1616.889400	no-P	90.000008	1620.603902	0.020731	2.805859	0.035810	10.288739	0.007210
Aurora B	313	318	SDGSKD		608.252200	all-P	0.000000	608.537494	0.022052	0.000000	0.000000	9.148296	0.004732
Aurora B	313	318	SDGSKD		608.252200	all-P	3.000000	610.801394	0.100473	2.263899	0.102865	9.134228	0.022395
Aurora B	313	318	SDGSKD		608.252200	all-P	10.000000	610.809387	0.112386	2.271893	0.114529	9.124752	0.020734
Aurora B	313	318	SDGSKD		608.252200	all-P	30.000002	610.859080	0.079459	2.321586	0.082462	9.156082	0.015275
Aurora B	313	318	SDGSKD		608.252200	all-P	90.000008	610.867600	0.069545	2.330106	0.072957	9.163346	0.017646
Aurora B	313	318	SDGSKD		608.252200	no-P	0.000000	608.537494	0.022052	0.000000	0.000000	9.148296	0.004732
Aurora B	313	318	SDGSKD		608.252200	no-P	3.000000	610.795062	0.204731	2.257568	0.205915	9.138013	0.011435
Aurora B	313	318	SDGSKD		608.252200	no-P	10.000000	610.802849	0.074767	2.265355	0.077951	9.133703	0.021301
Aurora B	313	318	SDGSKD		608.252200	no-P	30.000002	610.891848	0.061844	2.354354	0.065658	9.161041	0.015414
Aurora B	313	318	SDGSKD		608.252200	no-P	90.000008	610.885585	0.104082	2.348090	0.106392	9.164026	0.014883
Aurora B	313	319	SDGSKDL		721.336300	all-P	0.000000	721.637107	0.024382	0.000000	0.000000	9.740908	0.005791
Aurora B	313	319	SDGSKDL		721.336300	all-P	3.000000	723.674432	0.083422	2.037325	0.086912	9.725075	0.022625
Aurora B	313	319	SDGSKDL		721.336300	all-P	10.000000	723.819472	0.144644	2.182365	0.146684	9.714094	0.020665
Aurora B	313	319	SDGSKDL		721.336300	all-P	30.000002	723.755752	0.106283	2.118646	0.109044	9.741894	0.014729
Aurora B	313	319	SDGSKDL		721.336300	all-P	90.000008	723.800156	0.242122	2.163049	0.243346	9.752232	0.020352
Aurora B	313	319	SDGSKDL		721.336300	no-P	0.000000	721.637107	0.024382	0.000000	0.000000	9.740908	0.005791
Aurora B	313	319	SDGSKDL		721.336300	no-P	3.000000	723.825194	0.295874	2.188087	0.296877	9.730509	0.018333
Aurora B	313	319	SDGSKDL		721.336300	no-P	10.000000	723.820671	0.162162	2.183564	0.163985	9.721381	0.019231
Aurora B	313	319	SDGSKDL		721.336300	no-P	30.000002	723.835156	0.246516	2.198049	0.247719	9.742450	0.021123
Aurora B	313	319	SDGSKDL		721.336300	no-P	90.000008	723.811800	0.058169	2.174693	0.063072	9.755048	0.019828
Aurora B	313	323	SDGSKDLISKL		1162.631400	all-P	0.000000	1163.215670	0.072382	0.000000	0.000000	7.948368	0.002076
Aurora B	313	323	SDGSKDLISKL		1162.631400	all-P	3.000000	1163.788028	0.052520	0.572358	0.089428	7.944082	0.025043
Aurora B	313	323	SDGSKDLISKL		1162.631400	all-P	10.000000	1163.819867	0.039535	0.604198	0.082475	7.932817	0.020464
Aurora B	313	323	SDGSKDLISKL		1162.631400	all-P	30.000002	1163.819296	0.037720	0.603626	0.081621	7.961659	0.008685
Aurora B	313	323	SDGSKDLISKL		1162.631400	all-P	90.000008	1163.876885	0.035980	0.661216	0.080831	7.958860	0.018642
Aurora B	313	323	SDGSKDLISKL		1162.631400	no-P	0.000000	1163.215670	0.072382	0.000000	0.000000	7.948368	0.002076
Aurora B	313	323	SDGSKDLISKL		1162.631400	no-P	3.000000	1163.849843	0.047337	0.634174	0.086486	7.942063	0.012779
Aurora B	313	323	SDGSKDLISKL		1162.631400	no-P	10.000000	1163.846836	0.055079	0.631166	0.090955	7.936959	0.020240
Aurora B	313	323	SDGSKDLISKL		1162.631400	no-P	30.000002	1163.832296	0.052256	0.616626	0.089274	7.954659	0.009088
Aurora B	313	323	SDGSKDLISKL		1162.631400	no-P	90.000008	1163.990250	0.031477	0.774580	0.078930	7.965394	0.009430
Aurora B	315	323	GSKDLISKL		960.572400	all-P	0.000000	961.384359	0.087195	0.000000	0.000000	7.798111	0.003677
Aurora B	315	323	GSKDLISKL		960.572400	all-P	3.000000	961.535443	0.076311	0.151083	0.115872	7.787121	0.017683
Aurora B	315	323	GSKDLISKL		960.572400	all-P	10.000000	961.552712	0.064970	0.168353	0.108739	7.779632	0.014192
Aurora B	315	323	GSKDLISKL		960.572400	all-P	30.000002	961.563970	0.085812	0.179611	0.122338	7.811446	0.012293
Aurora B	315	323	GSKDLISKL		960.572400	all-P	90.000008	961.612995	0.086336	0.228636	0.122707	7.820213	0.018476
Aurora B	315	323	GSKDLISKL		960.572400	no-P	0.000000	961.384359	0.087195	0.000000	0.000000	7.798111	0.003677
Aurora B	315	323	GSKDLISKL		960.572400	no-P	3.000000	961.578355	0.081199	0.193995	0.119148	7.797103	0.016745
Aurora B	315	323	GSKDLISKL		960.572400	no-P	10.000000	961.577233	0.077475	0.192873	0.116642	7.793290	0.017371
Aurora B	315	323	GSKDLISKL		960.572400	no-P	30.000002	961.600195	0.071189	0.215836	0.112565	7.803132	0.018079
Aurora B	315	323	GSKDLISKL		960.572400	no-P	90.000008	961.616689	0.073675	0.232329	0.114153	7.809579	0.010853
Aurora B	319	323	LISKL		573.397000	all-P	0.000000	573.931413	0.011621	0.000000	0.000000	7.100822	0.003463
Aurora B	319	323	LISKL		573.397000	all-P	3.000000	574.000388	0.013045	0.068975	0.017471	7.101942	0.021813
Aurora B	319	323	LISKL		573.397000	all-P	10.000000	574.027616	0.026838	0.096203	0.029246	7.090508	0.017316
Aurora B	319	323	LISKL		573.397000	all-P	30.000002	573.990683	0.011473	0.059270	0.016330	7.110297	0.018041
Aurora B	319	323	LISKL		573.397000	all-P	90.000008	573.987939	0.034599	0.056525	0.036499	7.118777	0.017645
Aurora B	319	323	LISKL		573.397000	no-P	0.000000	573.931413	0.011621	0.000000	0.000000	7.100822	0.003463
Aurora B	319	323	LISKL		573.397000	no-P	3.000000	574.015338	0.034781	0.083925	0.036671	7.099775	0.012986
Aurora B	319	323	LISKL		573.397000	no-P	10.000000	574.012725	0.033766	0.081311	0.035710	7.101400	0.018655
Aurora B	319	323	LISKL		573.397000	no-P	30.000002	574.030953	0.017621	0.099539	0.021108	7.107045	0.018259
Aurora B	319	323	LISKL		573.397000	no-P	90.000008	574.031295	0.026049	0.099882	0.028524	7.117050	0.012050
Aurora B	320	323	ISKL		460.313000	all-P	0.000000	460.558841	0.004665	0.000000	0.000000	5.955256	0.004527
Aurora B	320	323	ISKL		460.313000	all-P	3.000000	460.606890	0.011212	0.048050	0.012144	5.950597	0.023272
Aurora B	320	323	ISKL		460.313000	all-P	10.000000	460.617761	0.007592	0.058920	0.008910	5.936862	0.021872
Aurora B	320	323	ISKL		460.313000	all-P	30.000002	460.608828	0.031800	0.049987	0.032140	5.950734	0.010152
Aurora B	320	323	ISKL		460.313000	all-P	90.000008	460.604202	0.007065	0.045362	0.008466	5.964931	0.019408
Aurora B	320	323	ISKL		460.313000	no-P	0.000000	460.558841	0.004665	0.000000	0.000000	5.955256	0.004527
Aurora B	320	323	ISKL		460.313000	no-P	3.000000	460.631166	0.019501	0.072325	0.020051	5.951177	0.013688
Aurora B	320	323	ISKL		460.313000	no-P	10.000000	460.644260	0.029955	0.085419	0.030316	5.948770	0.014642
Aurora B	320	323	ISKL		460.313000	no-P	30.000002	460.638587	0.019425	0.079747	0.019977	5.955111	0.009646
Aurora B	320	323	ISKL		460.313000	no-P	90.000008	460.616686	0.018664	0.057846	0.019238	5.965832	0.013557
Aurora B	324	336	LRYHPPQRLPLKG		1574.927800	all-P	0.000000	1575.948170	0.100881	0.000000	0.000000	6.254378	0.008495
Aurora B	324	336	LRYHPPQRLPLKG		1574.927800	all-P	3.000000	1578.696703	0.046092	2.748532	0.110912	6.247151	0.021837
Aurora B	324	336	LRYHPPQRLPLKG		1574.927800	all-P	10.000000	1579.396423	0.174757	3.448253	0.201784	6.230578	0.016690
Aurora B	324	336	LRYHPPQRLPLKG		1574.927800	all-P	30.000002	1579.861961	0.062850	3.913791	0.118857	6.264972	0.010507
Aurora B	324	336	LRYHPPQRLPLKG		1574.927800	all-P	90.000008	1580.663316	0.129689	4.715146	0.164305	6.270683	0.011917
Aurora B	324	336	LRYHPPQRLPLKG		1574.927800	no-P	0.000000	1575.948170	0.100881	0.000000	0.000000	6.254378	0.008495
Aurora B	324	336	LRYHPPQRLPLKG		1574.927800	no-P	3.000000	1579.288574	0.189512	3.340404	0.214689	6.254746	0.019910
Aurora B	324	336	LRYHPPQRLPLKG		1574.927800	no-P	10.000000	1579.840651	0.194105	3.892481	0.218755	6.249107	0.016670
Aurora B	324	336	LRYHPPQRLPLKG		1574.927800	no-P	30.000002	1580.658149	0.075019	4.709979	0.125717	6.265859	0.014759
Aurora B	324	336	LRYHPPQRLPLKG		1574.927800	no-P	90.000008	1581.358380	0.040844	5.410210	0.108835	6.269294	0.011368
Aurora B	324	338	LRYHPPQRLPLKGVM		1805.036700	all-P	0.000000	1806.633017	0.162380	0.000000	0.000000	7.654405	0.018181
Aurora B	324	338	LRYHPPQRLPLKGVM		1805.036700	all-P	3.000000	1809.336250	0.168557	2.703233	0.234049	7.652993	0.021701
Aurora B	324	338	LRYHPPQRLPLKGVM		1805.036700	all-P	30.000002	1810.532932	0.734084	3.899915	0.751828	7.679618	0.015572
Aurora B	324	338	LRYHPPQRLPLKGVM		1805.036700	all-P	90.000008	1810.919626	0.222152	4.286609	0.275170	7.695695	0.009026
Aurora B	324	338	LRYHPPQRLPLKGVM		1805.036700	no-P	0.000000	1806.633017	0.162380	0.000000	0.000000	7.654405	0.018181
Aurora B	324	338	LRYHPPQRLPLKGVM		1805.036700	no-P	3.000000	1809.656822	0.153320	3.023805	0.223325	7.660661	0.019383
Aurora B	324	338	LRYHPPQRLPLKGVM		1805.036700	no-P	10.000000	1810.130286	0.187436	3.497269	0.247991	7.654840	0.028205
Aurora B	324	338	LRYHPPQRLPLKGVM		1805.036700	no-P	90.000008	1811.525814	0.221885	4.892797	0.274955	7.691736	0.008245
Aurora B	324	347	LRYHPPQRLPLKGVMEHPWVKANS		2853.545700	all-P	0.000000	2855.406299	0.126242	0.000000	0.000000	7.816733	0.005922
Aurora B	324	347	LRYHPPQRLPLKGVMEHPWVKANS		2853.545700	all-P	3.000000	2858.377257	0.076202	2.970958	0.147458	7.811263	0.024582
Aurora B	324	347	LRYHPPQRLPLKGVMEHPWVKANS		2853.545700	all-P	10.000000	2858.835319	0.116774	3.429021	0.171969	7.797052	0.013086
Aurora B	324	347	LRYHPPQRLPLKGVMEHPWVKANS		2853.545700	all-P	30.000002	2859.605359	0.158118	4.199060	0.202332	7.823689	0.014923
Aurora B	324	347	LRYHPPQRLPLKGVMEHPWVKANS		2853.545700	all-P	90.000008	2860.769981	0.163650	5.363683	0.206684	7.840181	0.024150
Aurora B	324	347	LRYHPPQRLPLKGVMEHPWVKANS		2853.545700	no-P	0.000000	2855.406299	0.126242	0.000000	0.000000	7.816733	0.005922
Aurora B	324	347	LRYHPPQRLPLKGVMEHPWVKANS		2853.545700	no-P	3.000000	2858.968418	0.342406	3.562119	0.364937	7.808199	0.002614
Aurora B	324	347	LRYHPPQRLPLKGVMEHPWVKANS		2853.545700	no-P	10.000000	2859.622276	0.256975	4.215977	0.286310	7.809444	0.020884
Aurora B	324	347	LRYHPPQRLPLKGVMEHPWVKANS		2853.545700	no-P	30.000002	2860.568219	0.224881	5.161921	0.257892	7.825775	0.020680
Aurora B	324	347	LRYHPPQRLPLKGVMEHPWVKANS		2853.545700	no-P	90.000008	2861.795503	0.185950	6.389205	0.224754	7.831397	0.012766
Aurora B	328	336	PPQRLPLKG		1005.620400	all-P	0.000000	1006.125586	0.044089	0.000000	0.000000	6.637304	0.006099
Aurora B	328	336	PPQRLPLKG		1005.620400	all-P	3.000000	1007.662528	0.083121	1.536942	0.094091	6.622833	0.013604
Aurora B	328	336	PPQRLPLKG		1005.620400	all-P	10.000000	1007.870792	0.044642	1.745206	0.062744	6.616024	0.018969
Aurora B	328	336	PPQRLPLKG		1005.620400	all-P	30.000002	1008.060256	0.079995	1.934670	0.091341	6.639721	0.010938
Aurora B	328	336	PPQRLPLKG		1005.620400	all-P	90.000008	1008.555976	0.093436	2.430390	0.103316	6.641449	0.016197
Aurora B	328	336	PPQRLPLKG		1005.620400	no-P	0.000000	1006.125586	0.044089	0.000000	0.000000	6.637304	0.006099
Aurora B	328	336	PPQRLPLKG		1005.620400	no-P	3.000000	1007.864263	0.162232	1.738677	0.168117	6.635714	0.020367
Aurora B	328	336	PPQRLPLKG		1005.620400	no-P	10.000000	1008.155098	0.112744	2.029512	0.121058	6.626823	0.018720
Aurora B	328	336	PPQRLPLKG		1005.620400	no-P	30.000002	1008.579303	0.380970	2.453717	0.383513	6.646522	0.010205
Aurora B	328	336	PPQRLPLKG		1005.620400	no-P	90.000008	1008.988688	0.230644	2.863102	0.234821	6.653559	0.012266
Aurora B	337	361	VMEHPWVKANSRRVLPPVYQSTQSK		2937.551600	all-P	0.000000	2939.468378	0.072610	0.000000	0.000000	7.105579	0.004565
Aurora B	337	361	VMEHPWVKANSRRVLPPVYQSTQSK		2937.551600	all-P	3.000000	2947.699260	0.106177	8.230882	0.128630	7.097094	0.019026
Aurora B	337	361	VMEHPWVKANSRRVLPPVYQSTQSK		2937.551600	all-P	10.000000	2948.355170	0.123904	8.886791	0.143612	7.087417	0.017444
Aurora B	337	361	VMEHPWVKANSRRVLPPVYQSTQSK		2937.551600	all-P	30.000002	2949.026249	0.151117	9.557871	0.167656	7.112727	0.018876
Aurora B	337	361	VMEHPWVKANSRRVLPPVYQSTQSK		2937.551600	all-P	90.000008	2949.648195	0.154707	10.179817	0.170899	7.117676	0.024477
Aurora B	337	361	VMEHPWVKANSRRVLPPVYQSTQSK		2937.551600	no-P	0.000000	2939.468378	0.072610	0.000000	0.000000	7.105579	0.004565
Aurora B	337	361	VMEHPWVKANSRRVLPPVYQSTQSK		2937.551600	no-P	3.000000	2947.940125	0.112941	8.471747	0.134268	7.097810	0.014444
Aurora B	337	361	VMEHPWVKANSRRVLPPVYQSTQSK		2937.551600	no-P	10.000000	2948.688160	0.139741	9.219782	0.157479	7.094525	0.018387
Aurora B	337	361	VMEHPWVKANSRRVLPPVYQSTQSK		2937.551600	no-P	30.000002	2949.200608	0.130427	9.732230	0.149276	7.106372	0.014473
Aurora B	337	361	VMEHPWVKANSRRVLPPVYQSTQSK		2937.551600	no-P	90.000008	2949.834149	0.239108	10.365771	0.249890	7.118607	0.007844
Aurora B	338	347	MEHPWVKANS		1198.567400	all-P	0.000000	1199.534713	0.026897	0.000000	0.000000	6.752086	0.003467
Aurora B	338	347	MEHPWVKANS		1198.567400	all-P	3.000000	1199.910539	0.043181	0.375826	0.050873	6.748527	0.021614
Aurora B	338	347	MEHPWVKANS		1198.567400	all-P	10.000000	1200.047427	0.046772	0.512714	0.053955	6.738139	0.020877
Aurora B	338	347	MEHPWVKANS		1198.567400	all-P	30.000002	1200.163394	0.029070	0.628681	0.039604	6.763628	0.014425
Aurora B	338	347	MEHPWVKANS		1198.567400	all-P	90.000008	1200.399150	0.043452	0.864437	0.051103	6.765691	0.023945
Aurora B	338	347	MEHPWVKANS		1198.567400	no-P	0.000000	1199.534713	0.026897	0.000000	0.000000	6.752086	0.003467
Aurora B	338	347	MEHPWVKANS		1198.567400	no-P	3.000000	1199.944160	0.011689	0.409448	0.029328	6.748611	0.011386
Aurora B	338	347	MEHPWVKANS		1198.567400	no-P	10.000000	1200.065919	0.006096	0.531206	0.027579	6.747734	0.016133
Aurora B	338	347	MEHPWVKANS		1198.567400	no-P	30.000002	1200.193233	0.038132	0.658520	0.046664	6.763970	0.014671
Aurora B	338	347	MEHPWVKANS		1198.567400	no-P	90.000008	1200.453962	0.021867	0.919249	0.034665	6.773152	0.001195
Aurora B	339	347	EHPWVKANS		1067.526900	all-P	0.000000	1068.842836	0.185420	0.000000	0.000000	5.907240	0.026869
Aurora B	339	347	EHPWVKANS		1067.526900	all-P	3.000000	1070.019725	0.273554	1.176889	0.330473	5.912577	0.025687
Aurora B	339	347	EHPWVKANS		1067.526900	all-P	10.000000	1070.439461	0.347165	1.596625	0.393578	5.882199	0.000777
Aurora B	339	347	EHPWVKANS		1067.526900	all-P	30.000002	1070.579266	0.273905	1.736431	0.330763	5.922705	0.007953
Aurora B	339	347	EHPWVKANS		1067.526900	all-P	90.000008	1070.838823	0.242636	1.995987	0.305373	5.920337	0.018941
Aurora B	339	347	EHPWVKANS		1067.526900	no-P	0.000000	1068.842836	0.185420	0.000000	0.000000	5.907240	0.026869
Aurora B	339	347	EHPWVKANS		1067.526900	no-P	3.000000	1070.178685	0.331132	1.335849	0.379511	5.906736	0.009690
Aurora B	339	347	EHPWVKANS		1067.526900	no-P	10.000000	1070.487477	0.357557	1.644642	0.402774	5.907640	0.019809
Aurora B	339	347	EHPWVKANS		1067.526900	no-P	30.000002	1070.748960	0.326390	1.906125	0.375381	5.922849	0.011499
Aurora B	339	347	EHPWVKANS		1067.526900	no-P	90.000008	1070.840777	0.275700	1.997941	0.332252	5.921027	0.003333
Aurora B	339	361	EHPWVKANSRRVLPPVYQSTQSK		2707.442700	all-P	0.000000	2709.146763	0.050761	0.000000	0.000000	6.776920	0.008488
Aurora B	339	361	EHPWVKANSRRVLPPVYQSTQSK		2707.442700	all-P	3.000000	2717.325041	0.170201	8.178277	0.177610	6.764128	0.021755
Aurora B	339	361	EHPWVKANSRRVLPPVYQSTQSK		2707.442700	all-P	10.000000	2718.007139	0.237411	8.860376	0.242777	6.752344	0.017676
Aurora B	339	361	EHPWVKANSRRVLPPVYQSTQSK		2707.442700	all-P	30.000002	2718.661918	0.178638	9.515154	0.185710	6.781574	0.014359
Aurora B	339	361	EHPWVKANSRRVLPPVYQSTQSK		2707.442700	all-P	90.000008	2719.272951	0.231196	10.126188	0.236703	6.789456	0.023004
Aurora B	339	361	EHPWVKANSRRVLPPVYQSTQSK		2707.442700	no-P	0.000000	2709.146763	0.050761	0.000000	0.000000	6.776920	0.008488
Aurora B	339	361	EHPWVKANSRRVLPPVYQSTQSK		2707.442700	no-P	3.000000	2717.539456	0.211327	8.392692	0.217338	6.764137	0.010925
Aurora B	339	361	EHPWVKANSRRVLPPVYQSTQSK		2707.442700	no-P	10.000000	2718.211992	0.219671	9.065229	0.225460	6.767925	0.014679
Aurora B	339	361	EHPWVKANSRRVLPPVYQSTQSK		2707.442700	no-P	30.000002	2718.887552	0.160413	9.740788	0.168252	6.778697	0.012596
Aurora B	339	361	EHPWVKANSRRVLPPVYQSTQSK		2707.442700	no-P	90.000008	2719.459998	0.170226	10.313235	0.177634	6.787807	0.006428
Aurora B	341	347	PWVKANS		801.425400	all-P	0.000000	801.820473	0.018795	0.000000	0.000000	6.754862	0.007125
Aurora B	341	347	PWVKANS		801.425400	all-P	3.000000	802.116667	0.083439	0.296193	0.085529	6.749190	0.018403
Aurora B	341	347	PWVKANS		801.425400	all-P	10.000000	802.166135	0.041742	0.345662	0.045779	6.738728	0.015385
Aurora B	341	347	PWVKANS		801.425400	all-P	30.000002	802.247098	0.120145	0.426625	0.121606	6.765582	0.011784
Aurora B	341	347	PWVKANS		801.425400	all-P	90.000008	802.520599	0.221119	0.700126	0.221916	6.764523	0.023102
Aurora B	341	347	PWVKANS		801.425400	no-P	0.000000	801.820473	0.018795	0.000000	0.000000	6.754862	0.007125
Aurora B	341	347	PWVKANS		801.425400	no-P	3.000000	802.183436	0.059470	0.362963	0.062369	6.752203	0.013565
Aurora B	341	347	PWVKANS		801.425400	no-P	10.000000	802.178532	0.056055	0.358058	0.059122	6.748190	0.015070
Aurora B	341	347	PWVKANS		801.425400	no-P	30.000002	802.298962	0.101333	0.478489	0.103062	6.771990	0.011127
Aurora B	341	347	PWVKANS		801.425400	no-P	90.000008	802.594007	0.155391	0.773534	0.156523	6.768529	0.010761
Aurora B	348	355	RRVLPPVY		999.609800	all-P	0.000000	1000.353426	0.035432	0.000000	0.000000	7.875823	0.004850
Aurora B	348	355	RRVLPPVY		999.609800	all-P	3.000000	1003.523478	0.034534	3.170052	0.049478	7.860899	0.020302
Aurora B	348	355	RRVLPPVY		999.609800	all-P	10.000000	1003.834289	0.030623	3.480863	0.046831	7.848488	0.020762
Aurora B	348	355	RRVLPPVY		999.609800	all-P	30.000002	1003.854970	0.024147	3.501544	0.042877	7.878850	0.010247
Aurora B	348	355	RRVLPPVY		999.609800	all-P	90.000008	1003.826052	0.006476	3.472626	0.036019	7.891372	0.017725
Aurora B	348	355	RRVLPPVY		999.609800	no-P	0.000000	1000.353426	0.035432	0.000000	0.000000	7.875823	0.004850
Aurora B	348	355	RRVLPPVY		999.609800	no-P	3.000000	1003.581134	0.042658	3.227708	0.055453	7.859834	0.012322
Aurora B	348	355	RRVLPPVY		999.609800	no-P	10.000000	1003.809573	0.033904	3.456147	0.049040	7.857356	0.024401
Aurora B	348	355	RRVLPPVY		999.609800	no-P	30.000002	1003.882775	0.049997	3.529349	0.061279	7.882834	0.011139
Aurora B	348	355	RRVLPPVY		999.609800	no-P	90.000008	1003.878067	0.040025	3.524641	0.053455	7.889428	0.011026
Aurora B	348	356	RRVLPPVYQ		1127.668400	all-P	0.000000	1128.420394	0.029931	0.000000	0.000000	6.770069	0.004405
Aurora B	348	356	RRVLPPVYQ		1127.668400	all-P	3.000000	1132.302363	0.027619	3.881969	0.040727	6.756075	0.022470
Aurora B	348	356	RRVLPPVYQ		1127.668400	all-P	10.000000	1132.345614	0.026858	3.925220	0.040215	6.743771	0.016468
Aurora B	348	356	RRVLPPVYQ		1127.668400	all-P	30.000002	1132.434759	0.086696	4.014366	0.091717	6.775180	0.010926
Aurora B	348	356	RRVLPPVYQ		1127.668400	all-P	90.000008	1132.403685	0.084991	3.983291	0.090107	6.779401	0.024524
Aurora B	348	356	RRVLPPVYQ		1127.668400	no-P	0.000000	1128.420394	0.029931	0.000000	0.000000	6.770069	0.004405
Aurora B	348	356	RRVLPPVYQ		1127.668400	no-P	3.000000	1132.289156	0.017153	3.868762	0.034498	6.758601	0.012922
Aurora B	348	356	RRVLPPVYQ		1127.668400	no-P	10.000000	1132.511653	0.115535	4.091259	0.119349	6.757450	0.012258
Aurora B	348	356	RRVLPPVYQ		1127.668400	no-P	30.000002	1132.497391	0.103969	4.076997	0.108192	6.778821	0.008117
Aurora B	348	356	RRVLPPVYQ		1127.668400	no-P	90.000008	1132.646814	0.032308	4.226420	0.044041	6.785245	0.006590
Aurora B	348	358	RRVLPPVYQST		1315.748100	all-P	0.000000	1316.503326	0.186093	0.000000	0.000000	6.650001	0.011174
Aurora B	348	358	RRVLPPVYQST		1315.748100	all-P	3.000000	1321.930424	0.193465	5.427098	0.268439	6.614402	0.014962
Aurora B	348	358	RRVLPPVYQST		1315.748100	all-P	10.000000	1322.470414	0.505418	5.967088	0.538589	6.638056	0.025293
Aurora B	348	358	RRVLPPVYQST		1315.748100	all-P	30.000002	1322.357107	0.213531	5.853780	0.283242	6.639124	0.006254
Aurora B	348	358	RRVLPPVYQST		1315.748100	all-P	90.000008	1322.328848	0.212285	5.825521	0.282304	6.634227	0.016796
Aurora B	348	358	RRVLPPVYQST		1315.748100	no-P	0.000000	1316.503326	0.186093	0.000000	0.000000	6.650001	0.011174
Aurora B	348	358	RRVLPPVYQST		1315.748100	no-P	3.000000	1321.985897	0.088505	5.482571	0.206068	6.618215	0.017031
Aurora B	348	358	RRVLPPVYQST		1315.748100	no-P	10.000000	1322.597035	0.390443	6.093709	0.432523	6.634716	0.023658
Aurora B	348	358	RRVLPPVYQST		1315.748100	no-P	30.000002	1322.557085	0.181697	6.053759	0.260086	6.634790	0.014404
Aurora B	348	358	RRVLPPVYQST		1315.748100	no-P	90.000008	1322.240875	0.454177	5.737548	0.490823	6.636561	0.015536
Aurora B	348	361	RRVLPPVYQSTQSK		1658.933700	all-P	0.000000	1660.612354	0.477024	0.000000	0.000000	6.155814	0.016251
Aurora B	348	361	RRVLPPVYQSTQSK		1658.933700	all-P	3.000000	1667.696727	0.325190	7.084373	0.577322	6.161657	0.017263
Aurora B	348	361	RRVLPPVYQSTQSK		1658.933700	all-P	10.000000	1667.924605	0.306787	7.312252	0.567160	6.139300	0.015597
Aurora B	348	361	RRVLPPVYQSTQSK		1658.933700	all-P	30.000002	1667.956045	0.306271	7.343691	0.566881	6.171991	0.011903
Aurora B	348	361	RRVLPPVYQSTQSK		1658.933700	all-P	90.000008	1667.984671	0.291757	7.372317	0.559173	6.176702	0.021681
Aurora B	348	361	RRVLPPVYQSTQSK		1658.933700	no-P	0.000000	1660.612354	0.477024	0.000000	0.000000	6.155814	0.016251
Aurora B	348	361	RRVLPPVYQSTQSK		1658.933700	no-P	3.000000	1667.470495	1.161611	6.858142	1.255744	6.163908	0.014239
Aurora B	348	361	RRVLPPVYQSTQSK		1658.933700	no-P	10.000000	1667.949316	0.340761	7.336962	0.586234	6.165417	0.017025
Aurora B	348	361	RRVLPPVYQSTQSK		1658.933700	no-P	30.000002	1667.989151	0.332681	7.376798	0.581575	6.174100	0.018660
Aurora B	348	361	RRVLPPVYQSTQSK		1658.933700	no-P	90.000008	1668.032268	0.305868	7.419914	0.566664	6.179410	0.010289
IN-box	789	801	MDESQPRKPIPAW		1554.773300	all-P	0.000000	1555.770939	0.081910	0.000000	0.000000	8.117855	0.006620
IN-box	789	801	MDESQPRKPIPAW		1554.773300	all-P	3.000000	1561.231341	0.091759	5.460401	0.122999	8.099395	0.020799
IN-box	789	801	MDESQPRKPIPAW		1554.773300	all-P	10.000000	1561.162834	0.077871	5.391894	0.113018	8.093415	0.021999
IN-box	789	801	MDESQPRKPIPAW		1554.773300	all-P	30.000002	1561.227597	0.059800	5.456658	0.101416	8.117748	0.014614
IN-box	789	801	MDESQPRKPIPAW		1554.773300	all-P	90.000008	1561.259040	0.120204	5.488101	0.145459	8.119093	0.023439
IN-box	789	801	MDESQPRKPIPAW		1554.773300	no-P	0.000000	1555.770939	0.081910	0.000000	0.000000	8.117855	0.006620
IN-box	789	801	MDESQPRKPIPAW		1554.773300	no-P	3.000000	1561.242506	0.096306	5.471567	0.126428	8.102257	0.011990
IN-box	789	801	MDESQPRKPIPAW		1554.773300	no-P	10.000000	1561.165975	0.076400	5.395036	0.112009	8.099766	0.021993
IN-box	789	801	MDESQPRKPIPAW		1554.773300	no-P	30.000002	1561.290886	0.303415	5.519947	0.314277	8.107634	0.014513
IN-box	789	801	MDESQPRKPIPAW		1554.773300	no-P	90.000008	1561.258636	0.127996	5.487697	0.151961	8.129315	0.009389
IN-box	789	806	MDESQPRKPIPAWASGNL		1996.990900	all-P	0.000000	1999.662588	0.914916	0.000000	0.000000	8.478394	0.016921
IN-box	789	806	MDESQPRKPIPAWASGNL		1996.990900	all-P	3.000000	2006.924042	0.037784	7.261454	0.915696	8.491863	0.025659
IN-box	789	806	MDESQPRKPIPAWASGNL		1996.990900	all-P	10.000000	2007.490630	0.041906	7.828042	0.915875	8.475778	0.016075
IN-box	789	806	MDESQPRKPIPAWASGNL		1996.990900	all-P	30.000002	2007.785813	0.004909	8.123225	0.914929	8.503416	0.009405
IN-box	789	806	MDESQPRKPIPAWASGNL		1996.990900	all-P	90.000008	2007.750420	0.048612	8.087832	0.916207	8.503071	0.016183
IN-box	789	806	MDESQPRKPIPAWASGNL		1996.990900	no-P	0.000000	1999.662588	0.914916	0.000000	0.000000	8.478394	0.016921
IN-box	789	806	MDESQPRKPIPAWASGNL		1996.990900	no-P	3.000000	2007.320021	0.054170	7.657433	0.916518	8.491919	0.012280
IN-box	789	806	MDESQPRKPIPAWASGNL		1996.990900	no-P	10.000000	2007.673809	0.037484	8.011221	0.915684	8.486094	0.021258
IN-box	789	806	MDESQPRKPIPAWASGNL		1996.990900	no-P	30.000002	2007.784858	0.037698	8.122270	0.915692	8.500020	0.011221
IN-box	789	806	MDESQPRKPIPAWASGNL		1996.990900	no-P	90.000008	2007.771917	0.082341	8.109329	0.918614	8.512254	0.007225
IN-box	789	806	MDESQPRKPIPAWASGNL	Oxidation M (1)	2012.985800	all-P	0.000000	2014.330200	0.135516	0.000000	0.000000	8.408274	0.006139
IN-box	789	806	MDESQPRKPIPAWASGNL	Oxidation M (1)	2012.985800	all-P	3.000000	2022.711569	0.317748	8.381369	0.345439	8.378900	0.018059
IN-box	789	806	MDESQPRKPIPAWASGNL	Oxidation M (1)	2012.985800	all-P	10.000000	2023.262600	0.065784	8.932400	0.150639	8.369893	0.013929
IN-box	789	806	MDESQPRKPIPAWASGNL	Oxidation M (1)	2012.985800	all-P	30.000002	2023.483504	0.123919	9.153305	0.183631	8.405067	0.014207
IN-box	789	806	MDESQPRKPIPAWASGNL	Oxidation M (1)	2012.985800	all-P	90.000008	2023.466812	0.103819	9.136612	0.170713	8.408963	0.021225
IN-box	789	806	MDESQPRKPIPAWASGNL	Oxidation M (1)	2012.985800	no-P	0.000000	2014.330200	0.135516	0.000000	0.000000	8.408274	0.006139
IN-box	789	806	MDESQPRKPIPAWASGNL	Oxidation M (1)	2012.985800	no-P	3.000000	2023.106896	0.063549	8.776696	0.149676	8.395267	0.017020
IN-box	789	806	MDESQPRKPIPAWASGNL	Oxidation M (1)	2012.985800	no-P	10.000000	2023.429484	0.066776	9.099285	0.151075	8.384842	0.019228
IN-box	789	806	MDESQPRKPIPAWASGNL	Oxidation M (1)	2012.985800	no-P	30.000002	2023.482935	0.046445	9.152735	0.143254	8.405377	0.014201
IN-box	789	806	MDESQPRKPIPAWASGNL	Oxidation M (1)	2012.985800	no-P	90.000008	2023.359275	0.018164	9.029076	0.136728	8.418624	0.005372
IN-box	789	807	MDESQPRKPIPAWASGNLL		2110.075000	all-P	0.000000	2111.692896	0.226532	0.000000	0.000000	9.363517	0.016583
IN-box	789	807	MDESQPRKPIPAWASGNLL		2110.075000	all-P	3.000000	2119.992594	0.065588	8.299697	0.235836	9.352454	0.024982
IN-box	789	807	MDESQPRKPIPAWASGNLL		2110.075000	all-P	10.000000	2120.808874	0.094852	9.115978	0.245588	9.341879	0.024201
IN-box	789	807	MDESQPRKPIPAWASGNLL		2110.075000	all-P	30.000002	2121.226148	0.167631	9.533252	0.281810	9.372837	0.013740
IN-box	789	807	MDESQPRKPIPAWASGNLL		2110.075000	all-P	90.000008	2121.223998	0.174052	9.531101	0.285676	9.382998	0.016302
IN-box	789	807	MDESQPRKPIPAWASGNLL		2110.075000	no-P	0.000000	2111.692896	0.226532	0.000000	0.000000	9.363517	0.016583
IN-box	789	807	MDESQPRKPIPAWASGNLL		2110.075000	no-P	3.000000	2120.582623	0.103530	8.889727	0.249069	9.360421	0.019575
IN-box	789	807	MDESQPRKPIPAWASGNLL		2110.075000	no-P	10.000000	2121.240507	0.070379	9.547611	0.237213	9.352663	0.021880
IN-box	789	807	MDESQPRKPIPAWASGNLL		2110.075000	no-P	30.000002	2121.240889	0.196106	9.547993	0.299623	9.383224	0.016923
IN-box	789	807	MDESQPRKPIPAWASGNLL		2110.075000	no-P	90.000008	2121.301372	0.149874	9.608476	0.271623	9.374105	0.015096
IN-box	789	808	MDESQPRKPIPAWASGNLLT		2211.122700	all-P	0.000000	2213.037082	0.545335	0.000000	0.000000	8.929803	0.020558
IN-box	789	808	MDESQPRKPIPAWASGNLLT		2211.122700	all-P	3.000000	2221.424841	0.048615	8.387760	0.547497	8.915228	0.021304
IN-box	789	808	MDESQPRKPIPAWASGNLLT		2211.122700	all-P	10.000000	2222.442036	0.109668	9.404954	0.556253	8.906753	0.026105
IN-box	789	808	MDESQPRKPIPAWASGNLLT		2211.122700	all-P	30.000002	2223.038725	0.207787	10.001644	0.583580	8.934865	0.003029
IN-box	789	808	MDESQPRKPIPAWASGNLLT		2211.122700	all-P	90.000008	2223.234052	0.194404	10.196971	0.578950	8.934327	0.012992
IN-box	789	808	MDESQPRKPIPAWASGNLLT		2211.122700	no-P	0.000000	2213.037082	0.545335	0.000000	0.000000	8.929803	0.020558
IN-box	789	808	MDESQPRKPIPAWASGNLLT		2211.122700	no-P	3.000000	2222.253647	0.128351	9.216566	0.560235	8.925798	0.024218
IN-box	789	808	MDESQPRKPIPAWASGNLLT		2211.122700	no-P	10.000000	2222.923822	0.190672	9.886740	0.577707	8.918820	0.030453
IN-box	789	808	MDESQPRKPIPAWASGNLLT		2211.122700	no-P	30.000002	2223.113052	0.134967	10.075971	0.561788	8.930957	0.023501
IN-box	789	808	MDESQPRKPIPAWASGNLLT		2211.122700	no-P	90.000008	2223.120071	0.183128	10.082989	0.575261	8.938594	0.017148
IN-box	807	810	LTQA		432.245300	all-P	0.000000	432.689139	0.014989	0.000000	0.000000	3.990288	0.030859
IN-box	807	810	LTQA		432.245300	all-P	3.000000	433.447105	0.032374	0.757967	0.035676	3.993255	0.008963
IN-box	807	810	LTQA		432.245300	all-P	10.000000	433.904966	0.000420	1.215827	0.014995	3.975473	0.007910
IN-box	807	810	LTQA		432.245300	all-P	30.000002	434.102034	0.020325	1.412895	0.025254	3.994438	0.014397
IN-box	807	810	LTQA		432.245300	all-P	90.000008	434.190836	0.041018	1.501697	0.043671	3.970241	0.011515
IN-box	807	810	LTQA		432.245300	no-P	0.000000	432.689139	0.014989	0.000000	0.000000	3.990288	0.030859
IN-box	807	810	LTQA		432.245300	no-P	3.000000	433.791619	0.008037	1.102480	0.017008	3.983076	0.006896
IN-box	807	810	LTQA		432.245300	no-P	10.000000	434.116275	0.003961	1.427136	0.015504	3.987562	0.007094
IN-box	807	810	LTQA		432.245300	no-P	30.000002	434.178973	0.023119	1.489834	0.027553	4.002478	0.010967
IN-box	807	810	LTQA		432.245300	no-P	90.000008	434.230412	0.017674	1.541273	0.023174	4.005098	0.015763
IN-box	807	813	LTQAIRQ		829.489000	all-P	0.000000	830.024631	0.061384	0.000000	0.000000	5.058960	0.007573
IN-box	807	813	LTQAIRQ		829.489000	all-P	3.000000	831.301999	0.119870	1.277369	0.134673	5.049809	0.010511
IN-box	807	813	LTQAIRQ		829.489000	all-P	10.000000	832.304223	0.123083	2.279593	0.137541	5.034551	0.013615
IN-box	807	813	LTQAIRQ		829.489000	all-P	30.000002	833.379964	0.063138	3.355333	0.088059	5.038579	0.022450
IN-box	807	813	LTQAIRQ		829.489000	all-P	90.000008	834.181827	0.116808	4.157196	0.131955	5.050404	0.014266
IN-box	807	813	LTQAIRQ		829.489000	no-P	0.000000	830.024631	0.061384	0.000000	0.000000	5.058960	0.007573
IN-box	807	813	LTQAIRQ		829.489000	no-P	3.000000	832.682377	0.063887	2.657746	0.088598	5.049146	0.007992
IN-box	807	813	LTQAIRQ		829.489000	no-P	10.000000	833.645981	0.071281	3.621350	0.094069	5.043766	0.009008
IN-box	807	813	LTQAIRQ		829.489000	no-P	30.000002	834.249669	0.085295	4.225038	0.105087	5.039151	0.024583
IN-box	807	813	LTQAIRQ		829.489000	no-P	90.000008	834.329640	0.043532	4.305009	0.075253	5.049925	0.003308
IN-box	807	814	LTQAIRQQ		957.547600	all-P	0.000000	958.031717	0.013172	0.000000	0.000000	4.926831	0.004475
IN-box	807	814	LTQAIRQQ		957.547600	all-P	3.000000	959.313696	0.058863	1.281979	0.060319	4.901652	0.007359
IN-box	807	814	LTQAIRQQ		957.547600	all-P	10.000000	960.742906	0.077318	2.711189	0.078432	4.894962	0.011687
IN-box	807	814	LTQAIRQQ		957.547600	all-P	30.000002	962.036712	0.164218	4.004995	0.164746	4.904665	0.035852
IN-box	807	814	LTQAIRQQ		957.547600	all-P	90.000008	963.076472	0.083542	5.044755	0.084575	4.907034	0.023105
IN-box	807	814	LTQAIRQQ		957.547600	no-P	0.000000	958.031717	0.013172	0.000000	0.000000	4.926831	0.004475
IN-box	807	814	LTQAIRQQ		957.547600	no-P	3.000000	960.910232	0.097463	2.878515	0.098349	4.906383	0.009733
IN-box	807	814	LTQAIRQQ		957.547600	no-P	10.000000	962.541757	0.084004	4.510041	0.085031	4.894761	0.005659
IN-box	807	814	LTQAIRQQ		957.547600	no-P	30.000002	963.230758	0.150749	5.199042	0.151323	4.902503	0.024510
IN-box	807	814	LTQAIRQQ		957.547600	no-P	90.000008	963.239499	0.055767	5.207782	0.057302	4.897736	0.003255
IN-box	807	820	LTQAIRQQYYKPID		1736.933000	all-P	0.000000	1738.005820	0.104754	0.000000	0.000000	7.038643	0.005876
IN-box	807	820	LTQAIRQQYYKPID		1736.933000	all-P	3.000000	1740.794545	0.149212	2.788726	0.182312	7.020014	0.015464
IN-box	807	820	LTQAIRQQYYKPID		1736.933000	all-P	10.000000	1742.883188	0.059965	4.877368	0.120702	7.013474	0.020760
IN-box	807	820	LTQAIRQQYYKPID		1736.933000	all-P	30.000002	1745.260793	0.201851	7.254974	0.227414	7.034591	0.010039
IN-box	807	820	LTQAIRQQYYKPID		1736.933000	all-P	90.000008	1746.914888	0.052772	8.909069	0.117295	7.036864	0.008625
IN-box	807	820	LTQAIRQQYYKPID		1736.933000	no-P	0.000000	1738.005820	0.104754	0.000000	0.000000	7.038643	0.005876
IN-box	807	820	LTQAIRQQYYKPID		1736.933000	no-P	3.000000	1743.328564	0.701831	5.322745	0.709606	7.023874	0.018194
IN-box	807	820	LTQAIRQQYYKPID		1736.933000	no-P	10.000000	1745.668607	0.140785	7.662787	0.175481	7.016247	0.017199
IN-box	807	820	LTQAIRQQYYKPID		1736.933000	no-P	30.000002	1747.006544	0.108631	9.000724	0.150910	7.025506	0.014133
IN-box	807	820	LTQAIRQQYYKPID		1736.933000	no-P	90.000008	1747.121939	0.401037	9.116119	0.414492	7.036676	0.010822
IN-box	807	821	LTQAIRQQYYKPIDV		1836.001400	all-P	0.000000	1837.503600	0.429617	0.000000	0.000000	7.852471	0.019240
IN-box	807	821	LTQAIRQQYYKPIDV		1836.001400	all-P	3.000000	1840.834196	0.106642	3.330597	0.442655	7.833035	0.024914
IN-box	807	821	LTQAIRQQYYKPIDV		1836.001400	all-P	10.000000	1842.815044	0.131898	5.311445	0.449408	7.859210	0.005860
IN-box	807	821	LTQAIRQQYYKPIDV		1836.001400	all-P	30.000002	1844.619536	0.314136	7.115936	0.532214	7.845463	0.016913
IN-box	807	821	LTQAIRQQYYKPIDV		1836.001400	all-P	90.000008	1846.090919	0.415747	8.587320	0.597843	7.867279	0.005469
IN-box	807	821	LTQAIRQQYYKPIDV		1836.001400	no-P	0.000000	1837.503600	0.429617	0.000000	0.000000	7.852471	0.019240
IN-box	807	821	LTQAIRQQYYKPIDV		1836.001400	no-P	3.000000	1843.181158	0.072349	5.677559	0.435666	7.835118	0.016624
IN-box	807	821	LTQAIRQQYYKPIDV		1836.001400	no-P	10.000000	1844.939142	0.410693	7.435542	0.594340	7.828250	0.018350
IN-box	807	821	LTQAIRQQYYKPIDV		1836.001400	no-P	30.000002	1846.213257	0.358129	8.709657	0.559309	7.840995	0.006500
IN-box	807	821	LTQAIRQQYYKPIDV		1836.001400	no-P	90.000008	1846.374492	0.368138	8.870892	0.565770	7.845525	0.013026
IN-box	808	821	TQAIRQQYYKPIDV		1722.917300	all-P	0.000000	1723.969509	0.007820	0.000000	0.000000	7.638324	0.003329
IN-box	808	821	TQAIRQQYYKPIDV		1722.917300	all-P	3.000000	1726.906432	0.048624	2.936923	0.049248	7.633885	0.021442
IN-box	808	821	TQAIRQQYYKPIDV		1722.917300	all-P	10.000000	1728.650222	0.078008	4.680713	0.078399	7.621520	0.019108
IN-box	808	821	TQAIRQQYYKPIDV		1722.917300	all-P	30.000002	1731.077090	0.052171	7.107581	0.052754	7.648624	0.015006
IN-box	808	821	TQAIRQQYYKPIDV		1722.917300	all-P	90.000008	1732.614431	0.023812	8.644921	0.025063	7.665439	0.000254
IN-box	808	821	TQAIRQQYYKPIDV		1722.917300	no-P	0.000000	1723.969509	0.007820	0.000000	0.000000	7.638324	0.003329
IN-box	808	821	TQAIRQQYYKPIDV		1722.917300	no-P	3.000000	1729.306683	0.034342	5.337174	0.035221	7.633445	0.014144
IN-box	808	821	TQAIRQQYYKPIDV		1722.917300	no-P	10.000000	1731.637727	0.039072	7.668217	0.039847	7.623740	0.015079
IN-box	808	821	TQAIRQQYYKPIDV		1722.917300	no-P	30.000002	1732.776611	0.045184	8.807101	0.045856	7.649921	0.006426
IN-box	808	821	TQAIRQQYYKPIDV		1722.917300	no-P	90.000008	1732.845757	0.076201	8.876248	0.076601	7.648621	0.012379
IN-box	809	821	QAIRQQYYKPIDV		1621.869700	all-P	0.000000	1623.107157	0.019655	0.000000	0.000000	7.630222	0.001803
IN-box	809	821	QAIRQQYYKPIDV		1621.869700	all-P	3.000000	1625.882600	0.099634	2.775443	0.101554	7.613512	0.007509
IN-box	809	821	QAIRQQYYKPIDV		1621.869700	all-P	10.000000	1627.465423	0.000000	4.358266	0.019655	7.638719	0.000000
IN-box	809	821	QAIRQQYYKPIDV		1621.869700	all-P	30.000002	1629.134118	0.070649	6.026961	0.073332	7.635800	0.028811
IN-box	809	821	QAIRQQYYKPIDV		1621.869700	all-P	90.000008	1630.737450	0.076791	7.630293	0.079267	7.650949	0.017131
IN-box	809	821	QAIRQQYYKPIDV		1621.869700	no-P	0.000000	1623.107157	0.019655	0.000000	0.000000	7.630222	0.001803
IN-box	809	821	QAIRQQYYKPIDV		1621.869700	no-P	3.000000	1627.897192	0.032058	4.790035	0.037604	7.628035	0.013086
IN-box	809	821	QAIRQQYYKPIDV		1621.869700	no-P	10.000000	1629.624907	0.052858	6.517750	0.056394	7.618036	0.010190
IN-box	809	821	QAIRQQYYKPIDV		1621.869700	no-P	30.000002	1630.646495	0.040487	7.539339	0.045006	7.641145	0.014679
IN-box	809	821	QAIRQQYYKPIDV		1621.869700	no-P	90.000008	1630.916783	0.033138	7.809626	0.038529	7.637300	0.011299
IN-box	810	820	AIRQQYYKPID		1394.742700	all-P	0.000000	1395.704132	0.014737	0.000000	0.000000	6.690789	0.009768
IN-box	810	820	AIRQQYYKPID		1394.742700	all-P	3.000000	1397.816596	0.050498	2.112465	0.052604	6.679889	0.018945
IN-box	810	820	AIRQQYYKPID		1394.742700	all-P	10.000000	1399.203439	0.061751	3.499308	0.063485	6.667674	0.015060
IN-box	810	820	AIRQQYYKPID		1394.742700	all-P	30.000002	1400.930536	0.100582	5.226404	0.101656	6.686625	0.009004
IN-box	810	820	AIRQQYYKPID		1394.742700	all-P	90.000008	1402.224086	0.093647	6.519955	0.094799	6.695914	0.023142
IN-box	810	820	AIRQQYYKPID		1394.742700	no-P	0.000000	1395.704132	0.014737	0.000000	0.000000	6.690789	0.009768
IN-box	810	820	AIRQQYYKPID		1394.742700	no-P	3.000000	1399.635660	0.110685	3.931528	0.111661	6.678930	0.012482
IN-box	810	820	AIRQQYYKPID		1394.742700	no-P	10.000000	1401.440830	0.102983	5.736698	0.104032	6.671654	0.018593
IN-box	810	820	AIRQQYYKPID		1394.742700	no-P	30.000002	1402.296598	0.090549	6.592467	0.091741	6.681296	0.016842
IN-box	810	820	AIRQQYYKPID		1394.742700	no-P	90.000008	1402.399713	0.064469	6.695581	0.066132	6.694915	0.005837
IN-box	811	820	IRQQYYKPID		1323.705600	all-P	0.000000	1324.771802	0.028592	0.000000	0.000000	6.578755	0.012299
IN-box	811	820	IRQQYYKPID		1323.705600	all-P	3.000000	1326.719026	0.048382	1.947224	0.056199	6.581044	0.018544
IN-box	811	820	IRQQYYKPID		1323.705600	all-P	10.000000	1327.832466	0.180140	3.060665	0.182394	6.567863	0.012808
IN-box	811	820	IRQQYYKPID		1323.705600	all-P	30.000002	1329.039955	0.122283	4.268153	0.125581	6.578720	0.009140
IN-box	811	820	IRQQYYKPID		1323.705600	all-P	90.000008	1329.808042	0.248420	5.036240	0.250060	6.593080	0.009416
IN-box	811	820	IRQQYYKPID		1323.705600	no-P	0.000000	1324.771802	0.028592	0.000000	0.000000	6.578755	0.012299
IN-box	811	820	IRQQYYKPID		1323.705600	no-P	3.000000	1327.987183	0.054528	3.215381	0.061569	6.581191	0.019095
IN-box	811	820	IRQQYYKPID		1323.705600	no-P	10.000000	1329.209529	0.055750	4.437727	0.062654	6.573981	0.011129
IN-box	811	820	IRQQYYKPID		1323.705600	no-P	30.000002	1329.823271	0.168094	5.051469	0.170508	6.574309	0.012297
IN-box	811	820	IRQQYYKPID		1323.705600	no-P	90.000008	1329.953920	0.189817	5.182119	0.191958	6.589005	0.008184
IN-box	811	824	IRQQYYKPIDVDRM		1824.942500	all-P	0.000000	1826.013576	0.111538	0.000000	0.000000	7.657960	0.011988
IN-box	811	824	IRQQYYKPIDVDRM		1824.942500	all-P	3.000000	1830.353826	0.316518	4.340250	0.335595	7.640861	0.023432
IN-box	811	824	IRQQYYKPIDVDRM		1824.942500	all-P	10.000000	1831.771528	0.197969	5.757952	0.227227	7.626553	0.017736
IN-box	811	824	IRQQYYKPIDVDRM		1824.942500	all-P	30.000002	1833.143979	0.374984	7.130404	0.391221	7.659395	0.012947
IN-box	811	824	IRQQYYKPIDVDRM		1824.942500	all-P	90.000008	1834.289207	0.321315	8.275631	0.340124	7.660519	0.018629
IN-box	811	824	IRQQYYKPIDVDRM		1824.942500	no-P	0.000000	1826.013576	0.111538	0.000000	0.000000	7.657960	0.011988
IN-box	811	824	IRQQYYKPIDVDRM		1824.942500	no-P	3.000000	1831.847157	0.687055	5.833582	0.696049	7.644908	0.020600
IN-box	811	824	IRQQYYKPIDVDRM		1824.942500	no-P	10.000000	1833.638089	0.538630	7.624513	0.550057	7.631845	0.013999
IN-box	811	824	IRQQYYKPIDVDRM		1824.942500	no-P	30.000002	1834.195714	0.269859	8.182139	0.292001	7.652479	0.015380
IN-box	811	824	IRQQYYKPIDVDRM		1824.942500	no-P	90.000008	1834.176054	0.240924	8.162478	0.265490	7.658594	0.011243
IN-box	815	821	YYKPIDV		897.471600	all-P	0.000000	897.880943	0.000000	0.000000	0.000000	7.601664	0.000000
IN-box	815	821	YYKPIDV		897.471600	all-P	3.000000	899.499778	0.170911	1.618835	0.170911	7.592354	0.010973
IN-box	815	821	YYKPIDV		897.471600	all-P	10.000000	900.155694	0.078870	2.274752	0.078870	7.596242	0.034046
IN-box	815	821	YYKPIDV		897.471600	all-P	30.000002	900.764569	0.114297	2.883627	0.114297	7.607421	0.023431
IN-box	815	821	YYKPIDV		897.471600	all-P	90.000008	901.405524	0.000000	3.524581	0.000000	7.599628	0.000000
IN-box	815	821	YYKPIDV		897.471600	no-P	0.000000	897.880943	0.000000	0.000000	0.000000	7.601664	0.000000
IN-box	815	821	YYKPIDV		897.471600	no-P	3.000000	900.288086	0.157280	2.407143	0.157280	7.609540	0.028752
IN-box	815	821	YYKPIDV		897.471600	no-P	10.000000	901.131093	0.027019	3.250150	0.027019	7.584829	0.007589
IN-box	815	821	YYKPIDV		897.471600	no-P	30.000002	901.500632	0.101639	3.619689	0.101639	7.607420	0.015144
IN-box	815	821	YYKPIDV		897.471600	no-P	90.000008	901.573786	0.116934	3.692843	0.116934	7.629371	0.016880
IN-box	816	820	YKPID		635.339900	all-P	0.000000	635.652866	0.024222	0.000000	0.000000	6.581818	0.002599
IN-box	816	820	YKPID		635.339900	all-P	3.000000	636.461471	0.090264	0.808605	0.093458	6.582394	0.021407
IN-box	816	820	YKPID		635.339900	all-P	10.000000	637.135519	0.173106	1.482653	0.174792	6.568992	0.018792
IN-box	816	820	YKPID		635.339900	all-P	30.000002	637.473935	0.122435	1.821069	0.124808	6.583237	0.010794
IN-box	816	820	YKPID		635.339900	all-P	90.000008	638.264736	0.376748	2.611870	0.377526	6.602725	0.014565
IN-box	816	820	YKPID		635.339900	no-P	0.000000	635.652866	0.024222	0.000000	0.000000	6.581818	0.002599
IN-box	816	820	YKPID		635.339900	no-P	3.000000	637.309586	0.753453	1.656720	0.753842	6.558815	0.012538
IN-box	816	820	YKPID		635.339900	no-P	10.000000	637.243542	0.326325	1.590676	0.327223	6.576064	0.011229
IN-box	816	820	YKPID		635.339900	no-P	30.000002	638.078640	0.044248	2.425774	0.050444	6.544456	0.011722
IN-box	816	820	YKPID		635.339900	no-P	90.000008	638.304553	0.115361	2.651686	0.117877	6.567716	0.008799
IN-box	816	821	YKPIDV		734.408300	all-P	0.000000	734.765862	0.041314	0.000000	0.000000	7.257257	0.005282
IN-box	816	821	YKPIDV		734.408300	all-P	3.000000	736.788755	0.061199	2.022893	0.073839	7.252765	0.020758
IN-box	816	821	YKPIDV		734.408300	all-P	10.000000	737.078570	0.037526	2.312708	0.055813	7.242749	0.023396
IN-box	816	821	YKPIDV		734.408300	all-P	30.000002	737.183083	0.200536	2.417220	0.204748	7.265411	0.017927
IN-box	816	821	YKPIDV		734.408300	all-P	90.000008	737.392138	0.139811	2.626276	0.145787	7.270494	0.020609
IN-box	816	821	YKPIDV		734.408300	no-P	0.000000	734.765862	0.041314	0.000000	0.000000	7.257257	0.005282
IN-box	816	821	YKPIDV		734.408300	no-P	3.000000	736.916343	0.207253	2.150480	0.211330	7.252530	0.006109
IN-box	816	821	YKPIDV		734.408300	no-P	10.000000	737.230362	0.151850	2.464499	0.157370	7.247048	0.018957
IN-box	816	821	YKPIDV		734.408300	no-P	30.000002	737.352216	0.174144	2.586353	0.178978	7.261791	0.015943
IN-box	816	821	YKPIDV		734.408300	no-P	90.000008	737.499026	0.102951	2.733163	0.110932	7.272361	0.004653
IN-box	821	824	VDRM		520.254800	all-P	0.000000	520.608474	0.021798	0.000000	0.000000	5.114776	0.005013
IN-box	821	824	VDRM		520.254800	all-P	3.000000	522.234294	0.018687	1.625820	0.028711	5.112096	0.011440
IN-box	821	824	VDRM		520.254800	all-P	10.000000	522.273096	0.054576	1.664621	0.058768	5.100339	0.017334
IN-box	821	824	VDRM		520.254800	all-P	30.000002	522.336412	0.040628	1.727938	0.046106	5.108956	0.023654
IN-box	821	824	VDRM		520.254800	all-P	90.000008	522.337509	0.032653	1.729035	0.039260	5.105134	0.023468
IN-box	821	824	VDRM		520.254800	no-P	0.000000	520.608474	0.021798	0.000000	0.000000	5.114776	0.005013
IN-box	821	824	VDRM		520.254800	no-P	3.000000	522.121419	0.018915	1.512945	0.028860	5.109047	0.007910
IN-box	821	824	VDRM		520.254800	no-P	10.000000	522.315685	0.019731	1.707211	0.029401	5.108277	0.011476
IN-box	821	824	VDRM		520.254800	no-P	30.000002	522.357970	0.027976	1.749496	0.035466	5.105444	0.021209
IN-box	821	824	VDRM		520.254800	no-P	90.000008	522.463440	0.217128	1.854966	0.218219	5.122804	0.004396
IN-box	822	833	DRMYGTIDSPKL		1395.693700	all-P	0.000000	1396.668479	0.063807	0.000000	0.000000	7.785857	0.008886
IN-box	822	833	DRMYGTIDSPKL		1395.693700	all-P	3.000000	1401.918853	0.304347	5.250374	0.310964	7.779396	0.018920
IN-box	822	833	DRMYGTIDSPKL		1395.693700	all-P	10.000000	1402.451419	0.258311	5.782940	0.266075	7.772938	0.017790
IN-box	822	833	DRMYGTIDSPKL		1395.693700	all-P	30.000002	1402.721171	0.192462	6.052693	0.202764	7.800231	0.009149
IN-box	822	833	DRMYGTIDSPKL		1395.693700	all-P	90.000008	1402.766352	0.215237	6.097874	0.224496	7.804773	0.013448
IN-box	822	833	DRMYGTIDSPKL		1395.693700	no-P	0.000000	1396.668479	0.063807	0.000000	0.000000	7.785857	0.008886
IN-box	822	833	DRMYGTIDSPKL		1395.693700	no-P	3.000000	1402.299894	0.247258	5.631415	0.255358	7.784367	0.014916
IN-box	822	833	DRMYGTIDSPKL		1395.693700	no-P	10.000000	1402.693452	0.137237	6.024973	0.151345	7.785657	0.019671
IN-box	822	833	DRMYGTIDSPKL		1395.693700	no-P	30.000002	1402.676752	0.231193	6.008274	0.239836	7.793497	0.015683
IN-box	822	833	DRMYGTIDSPKL		1395.693700	no-P	90.000008	1402.777803	0.281558	6.109324	0.288697	7.810942	0.003605
IN-box	822	833	DRMYGTIDSPKL	Oxidation M (3)	1411.688600	all-P	0.000000	1412.524531	0.031422	0.000000	0.000000	7.338476	0.002827
IN-box	822	833	DRMYGTIDSPKL	Oxidation M (3)	1411.688600	all-P	3.000000	1418.553320	0.367695	6.028788	0.369035	7.322409	0.018442
IN-box	822	833	DRMYGTIDSPKL	Oxidation M (3)	1411.688600	all-P	10.000000	1418.726463	0.337795	6.201931	0.339253	7.310149	0.018735
IN-box	822	833	DRMYGTIDSPKL	Oxidation M (3)	1411.688600	all-P	30.000002	1418.710312	0.492253	6.185781	0.493255	7.329335	0.013058
IN-box	822	833	DRMYGTIDSPKL	Oxidation M (3)	1411.688600	all-P	90.000008	1418.576219	0.337971	6.051688	0.339429	7.351259	0.016111
IN-box	822	833	DRMYGTIDSPKL	Oxidation M (3)	1411.688600	no-P	0.000000	1412.524531	0.031422	0.000000	0.000000	7.338476	0.002827
IN-box	822	833	DRMYGTIDSPKL	Oxidation M (3)	1411.688600	no-P	3.000000	1418.572289	0.222227	6.047758	0.224438	7.327644	0.017042
IN-box	822	833	DRMYGTIDSPKL	Oxidation M (3)	1411.688600	no-P	10.000000	1418.757092	0.258927	6.232560	0.260826	7.322358	0.020069
IN-box	822	833	DRMYGTIDSPKL	Oxidation M (3)	1411.688600	no-P	30.000002	1418.692810	0.582072	6.168278	0.582920	7.343967	0.011350
IN-box	822	833	DRMYGTIDSPKL	Oxidation M (3)	1411.688600	no-P	90.000008	1419.016150	0.119811	6.491619	0.123863	7.346332	0.008309
IN-box	825	830	YGTIDS		655.293300	all-P	0.000000	655.560396	0.011336	0.000000	0.000000	5.823822	0.001377
IN-box	825	830	YGTIDS		655.293300	all-P	3.000000	658.576453	0.028478	3.016057	0.030651	5.819345	0.012901
IN-box	825	830	YGTIDS		655.293300	all-P	10.000000	658.688711	0.004858	3.128314	0.012333	5.808969	0.012356
IN-box	825	830	YGTIDS		655.293300	all-P	30.000002	658.703863	0.137654	3.143467	0.138120	5.824241	0.005824
IN-box	825	830	YGTIDS		655.293300	all-P	90.000008	658.910503	0.009983	3.350107	0.015105	5.839734	0.002774
IN-box	825	830	YGTIDS		655.293300	no-P	0.000000	655.560396	0.011336	0.000000	0.000000	5.823822	0.001377
IN-box	825	830	YGTIDS		655.293300	no-P	3.000000	658.713480	0.030697	3.153084	0.032723	5.820142	0.009749
IN-box	825	830	YGTIDS		655.293300	no-P	10.000000	658.733216	0.045869	3.172820	0.047249	5.813909	0.013613
IN-box	825	830	YGTIDS		655.293300	no-P	30.000002	658.758184	0.132835	3.197788	0.133317	5.820840	0.016772
IN-box	825	830	YGTIDS		655.293300	no-P	90.000008	658.887300	0.079312	3.326904	0.080118	5.822068	0.002203
IN-box	825	833	YGTIDSPKL		993.525100	all-P	0.000000	994.342063	0.548637	0.000000	0.000000	7.580052	0.015593
IN-box	825	833	YGTIDSPKL		993.525100	all-P	3.000000	998.629180	0.061838	4.287116	0.552111	7.573473	0.016216
IN-box	825	833	YGTIDSPKL		993.525100	all-P	10.000000	998.753545	0.001130	4.411482	0.548638	7.557555	0.014078
IN-box	825	833	YGTIDSPKL		993.525100	all-P	30.000002	998.627699	0.191729	4.285636	0.581174	7.575987	0.008165
IN-box	825	833	YGTIDSPKL		993.525100	all-P	90.000008	998.777411	0.036777	4.435348	0.549868	7.582304	0.011068
IN-box	825	833	YGTIDSPKL		993.525100	no-P	0.000000	994.342063	0.548637	0.000000	0.000000	7.580052	0.015593
IN-box	825	833	YGTIDSPKL		993.525100	no-P	3.000000	998.734574	0.053831	4.392511	0.551272	7.564496	0.012368
IN-box	825	833	YGTIDSPKL		993.525100	no-P	10.000000	998.738378	0.035420	4.396315	0.549779	7.566910	0.012406
IN-box	825	833	YGTIDSPKL		993.525100	no-P	30.000002	998.765826	0.032823	4.423763	0.549618	7.576316	0.013218
IN-box	825	833	YGTIDSPKL		993.525100	no-P	90.000008	998.751103	0.055602	4.409040	0.551447	7.581983	0.005290
IN-box	825	835	YGTIDSPKLEE		1251.610300	all-P	0.000000	1252.821678	0.058149	0.000000	0.000000	7.113101	0.010499
IN-box	825	835	YGTIDSPKLEE		1251.610300	all-P	3.000000	1257.573251	0.022539	4.751573	0.062364	7.110454	0.020008
IN-box	825	835	YGTIDSPKLEE		1251.610300	all-P	10.000000	1257.687830	0.106135	4.866152	0.121020	7.100141	0.015744
IN-box	825	835	YGTIDSPKLEE		1251.610300	all-P	30.000002	1257.777049	0.054210	4.955371	0.079498	7.119897	0.012989
IN-box	825	835	YGTIDSPKLEE		1251.610300	all-P	90.000008	1257.732973	0.054101	4.911295	0.079424	7.124649	0.021416
IN-box	825	835	YGTIDSPKLEE		1251.610300	no-P	0.000000	1252.821678	0.058149	0.000000	0.000000	7.113101	0.010499
IN-box	825	835	YGTIDSPKLEE		1251.610300	no-P	3.000000	1257.720643	0.051019	4.898965	0.077358	7.105771	0.010092
IN-box	825	835	YGTIDSPKLEE		1251.610300	no-P	10.000000	1257.823801	0.102921	5.002123	0.118212	7.129163	0.001423
IN-box	825	835	YGTIDSPKLEE		1251.610300	no-P	30.000002	1257.724967	0.056476	4.903288	0.081061	7.125486	0.007107
IN-box	825	835	YGTIDSPKLEE		1251.610300	no-P	90.000008	1257.702360	0.066518	4.880682	0.088351	7.133790	0.007461
IN-box	825	836	YGTIDSPKLEEL		1364.694400	all-P	0.000000	1365.669755	0.008679	0.000000	0.000000	8.590714	0.003579
IN-box	825	836	YGTIDSPKLEEL		1364.694400	all-P	3.000000	1370.932099	0.075314	5.262344	0.075812	8.597533	0.022322
IN-box	825	836	YGTIDSPKLEEL		1364.694400	all-P	10.000000	1371.365115	0.101599	5.695360	0.101969	8.589772	0.015039
IN-box	825	836	YGTIDSPKLEEL		1364.694400	all-P	30.000002	1371.689436	0.055215	6.019682	0.055893	8.610809	0.018986
IN-box	825	836	YGTIDSPKLEEL		1364.694400	all-P	90.000008	1371.607429	0.106841	5.937674	0.107193	8.630095	0.016921
IN-box	825	836	YGTIDSPKLEEL		1364.694400	no-P	0.000000	1365.669755	0.008679	0.000000	0.000000	8.590714	0.003579
IN-box	825	836	YGTIDSPKLEEL		1364.694400	no-P	3.000000	1371.682310	0.062079	6.012555	0.062682	8.601408	0.015126
IN-box	825	836	YGTIDSPKLEEL		1364.694400	no-P	10.000000	1371.558601	0.116911	5.888847	0.117233	8.595744	0.022306
IN-box	825	836	YGTIDSPKLEEL		1364.694400	no-P	30.000002	1371.769856	0.126478	6.100102	0.126776	8.614193	0.021458
IN-box	825	836	YGTIDSPKLEEL		1364.694400	no-P	90.000008	1371.743045	0.054001	6.073291	0.054694	8.620117	0.019022
IN-box	826	833	GTIDSPKL		830.461800	all-P	0.000000	831.015458	0.007688	0.000000	0.000000	7.566854	0.003402
IN-box	826	833	GTIDSPKL		830.461800	all-P	3.000000	834.554844	0.010999	3.539386	0.013419	7.565231	0.018321
IN-box	826	833	GTIDSPKL		830.461800	all-P	10.000000	834.553553	0.005469	3.538095	0.009435	7.557815	0.016912
IN-box	826	833	GTIDSPKL		830.461800	all-P	30.000002	834.580757	0.037076	3.565299	0.037865	7.569475	0.003234
IN-box	826	833	GTIDSPKL		830.461800	all-P	90.000008	834.535041	0.049907	3.519583	0.050496	7.596433	0.000480
IN-box	826	833	GTIDSPKL		830.461800	no-P	0.000000	831.015458	0.007688	0.000000	0.000000	7.566854	0.003402
IN-box	826	833	GTIDSPKL		830.461800	no-P	3.000000	834.564696	0.031717	3.549237	0.032636	7.564724	0.012799
IN-box	826	833	GTIDSPKL		830.461800	no-P	10.000000	834.611575	0.020178	3.596117	0.021592	7.561007	0.013889
IN-box	826	833	GTIDSPKL		830.461800	no-P	30.000002	834.596962	0.025291	3.581504	0.026434	7.576144	0.013667
IN-box	826	833	GTIDSPKL		830.461800	no-P	90.000008	834.564374	0.029888	3.548916	0.030861	7.581419	0.007551
IN-box	827	833	TIDSPKL		773.440300	all-P	0.000000	773.838911	0.041477	0.000000	0.000000	7.568959	0.004727
IN-box	827	833	TIDSPKL		773.440300	all-P	3.000000	777.329044	0.122964	3.490133	0.129771	7.563993	0.018291
IN-box	827	833	TIDSPKL		773.440300	all-P	10.000000	777.411784	0.147010	3.572873	0.152749	7.557549	0.017856
IN-box	827	833	TIDSPKL		773.440300	all-P	30.000002	777.387405	0.045452	3.548494	0.061532	7.577714	0.012417
IN-box	827	833	TIDSPKL		773.440300	all-P	90.000008	777.364118	0.057713	3.525207	0.071071	7.582843	0.016229
IN-box	827	833	TIDSPKL		773.440300	no-P	0.000000	773.838911	0.041477	0.000000	0.000000	7.568959	0.004727
IN-box	827	833	TIDSPKL		773.440300	no-P	3.000000	777.347028	0.042688	3.508118	0.059520	7.566918	0.014069
IN-box	827	833	TIDSPKL		773.440300	no-P	10.000000	777.367991	0.135185	3.529080	0.141405	7.559268	0.012352
IN-box	827	833	TIDSPKL		773.440300	no-P	30.000002	777.412347	0.145996	3.573437	0.151773	7.577713	0.014220
IN-box	827	833	TIDSPKL		773.440300	no-P	90.000008	777.367654	0.115562	3.528743	0.122780	7.583060	0.005645
IN-box	828	833	IDSPKL		672.392700	all-P	0.000000	672.720052	0.015895	0.000000	0.000000	7.574725	0.005960
IN-box	828	833	IDSPKL		672.392700	all-P	3.000000	675.608642	0.013057	2.888591	0.020571	7.566105	0.020348
IN-box	828	833	IDSPKL		672.392700	all-P	10.000000	675.548588	0.009778	2.828537	0.018662	7.555455	0.014887
IN-box	828	833	IDSPKL		672.392700	all-P	30.000002	675.638191	0.062992	2.918139	0.064967	7.577827	0.010122
IN-box	828	833	IDSPKL		672.392700	all-P	90.000008	675.572031	0.004877	2.851979	0.016627	7.581633	0.016122
IN-box	828	833	IDSPKL		672.392700	no-P	0.000000	672.720052	0.015895	0.000000	0.000000	7.574725	0.005960
IN-box	828	833	IDSPKL		672.392700	no-P	3.000000	675.592665	0.048660	2.872614	0.051190	7.567683	0.014953
IN-box	828	833	IDSPKL		672.392700	no-P	10.000000	675.671046	0.040224	2.950994	0.043250	7.560877	0.013569
IN-box	828	833	IDSPKL		672.392700	no-P	30.000002	675.652773	0.014654	2.932721	0.021619	7.577215	0.017580
IN-box	828	833	IDSPKL		672.392700	no-P	90.000008	675.613577	0.014519	2.893525	0.021528	7.586277	0.009567
IN-box	829	833	DSPKL		559.308600	all-P	0.000000	559.614808	0.007051	0.000000	0.000000	7.567685	0.004831
IN-box	829	833	DSPKL		559.308600	all-P	3.000000	562.143863	0.106800	2.529056	0.107032	7.563623	0.017430
IN-box	829	833	DSPKL		559.308600	all-P	10.000000	562.108201	0.023386	2.493393	0.024426	7.552362	0.017701
IN-box	829	833	DSPKL		559.308600	all-P	30.000002	562.191267	0.031619	2.576459	0.032396	7.576447	0.012403
IN-box	829	833	DSPKL		559.308600	all-P	90.000008	562.154306	0.036001	2.539498	0.036685	7.581663	0.015249
IN-box	829	833	DSPKL		559.308600	no-P	0.000000	559.614808	0.007051	0.000000	0.000000	7.567685	0.004831
IN-box	829	833	DSPKL		559.308600	no-P	3.000000	562.113603	0.071755	2.498796	0.072101	7.565651	0.014170
IN-box	829	833	DSPKL		559.308600	no-P	10.000000	562.184636	0.035032	2.569828	0.035734	7.561073	0.012978
IN-box	829	833	DSPKL		559.308600	no-P	30.000002	562.230715	0.067030	2.615907	0.067400	7.573472	0.014016
IN-box	829	833	DSPKL		559.308600	no-P	90.000008	562.209667	0.030313	2.594860	0.031122	7.580084	0.007156
IN-box	836	844	LFNKSKPRY		1152.652400	all-P	0.000000	1153.602441	0.057914	0.000000	0.000000	6.158949	0.010372
IN-box	836	844	LFNKSKPRY		1152.652400	all-P	3.000000	1157.140574	0.081146	3.538133	0.099693	6.149682	0.022432
IN-box	836	844	LFNKSKPRY		1152.652400	all-P	10.000000	1157.078900	0.057584	3.476460	0.081670	6.138247	0.018265
IN-box	836	844	LFNKSKPRY		1152.652400	all-P	30.000002	1157.177220	0.005397	3.574779	0.058165	6.171197	0.010221
IN-box	836	844	LFNKSKPRY		1152.652400	all-P	90.000008	1157.130169	0.038901	3.527729	0.069766	6.175345	0.026372
IN-box	836	844	LFNKSKPRY		1152.652400	no-P	0.000000	1153.602441	0.057914	0.000000	0.000000	6.158949	0.010372
IN-box	836	844	LFNKSKPRY		1152.652400	no-P	3.000000	1157.039107	0.070165	3.436666	0.090979	6.149912	0.013343
IN-box	836	844	LFNKSKPRY		1152.652400	no-P	10.000000	1157.122832	0.068044	3.520391	0.089353	6.152610	0.020999
IN-box	836	844	LFNKSKPRY		1152.652400	no-P	30.000002	1157.098257	0.024433	3.495816	0.062857	6.158268	0.012080
IN-box	836	844	LFNKSKPRY		1152.652400	no-P	90.000008	1157.130810	0.037858	3.528370	0.069190	6.171381	0.006386
IN-box	837	844	FNKSKPRY		1039.568300	all-P	0.000000	1040.976698	0.473100	0.000000	0.000000	5.375983	0.301600
IN-box	837	844	FNKSKPRY		1039.568300	all-P	3.000000	1043.595744	0.070231	2.619046	0.478284	5.268516	0.021006
IN-box	837	844	FNKSKPRY		1039.568300	all-P	10.000000	1043.556106	0.085244	2.579407	0.480718	5.249841	0.012766
IN-box	837	844	FNKSKPRY		1039.568300	all-P	30.000002	1043.584193	0.118454	2.607495	0.487703	5.277186	0.017704
IN-box	837	844	FNKSKPRY		1039.568300	all-P	90.000008	1043.561429	0.117530	2.584731	0.487480	5.287474	0.024728
IN-box	837	844	FNKSKPRY		1039.568300	no-P	0.000000	1040.976698	0.473100	0.000000	0.000000	5.375983	0.301600
IN-box	837	844	FNKSKPRY		1039.568300	no-P	3.000000	1043.571809	0.128610	2.595111	0.490269	5.268758	0.018089
IN-box	837	844	FNKSKPRY		1039.568300	no-P	10.000000	1043.488750	0.079803	2.512051	0.479783	5.267801	0.020861
IN-box	837	844	FNKSKPRY		1039.568300	no-P	30.000002	1043.560701	0.080066	2.584002	0.479827	5.278670	0.016092
IN-box	837	844	FNKSKPRY		1039.568300	no-P	90.000008	1043.582670	0.101396	2.605972	0.483843	5.277233	0.001764
IN-box	838	844	NKSKPRY		892.499900	all-P	0.000000	893.353018	0.081116	0.000000	0.000000	5.276135	0.004975
IN-box	838	844	NKSKPRY		892.499900	all-P	3.000000	896.254452	0.018414	2.901434	0.083180	5.266646	0.020099
IN-box	838	844	NKSKPRY		892.499900	all-P	10.000000	896.212741	0.025805	2.859723	0.085122	5.254198	0.014710
IN-box	838	844	NKSKPRY		892.499900	all-P	30.000002	896.275951	0.031865	2.922933	0.087150	5.268859	0.018898
IN-box	838	844	NKSKPRY		892.499900	all-P	90.000008	896.252438	0.060210	2.899420	0.101020	5.278240	0.020421
IN-box	838	844	NKSKPRY		892.499900	no-P	0.000000	893.353018	0.081116	0.000000	0.000000	5.276135	0.004975
IN-box	838	844	NKSKPRY		892.499900	no-P	3.000000	896.063590	0.072621	2.710573	0.108875	5.267000	0.012097
IN-box	838	844	NKSKPRY		892.499900	no-P	10.000000	895.990243	0.214896	2.637225	0.229696	5.261858	0.015700
IN-box	838	844	NKSKPRY		892.499900	no-P	30.000002	896.073973	0.165608	2.720955	0.184407	5.265615	0.018445
IN-box	838	844	NKSKPRY		892.499900	no-P	90.000008	896.074131	0.180597	2.721114	0.197977	5.274100	0.007316
IN-box	840	844	SKPRY		650.362000	all-P	0.000000	650.718533	0.004043	0.000000	0.000000	5.275732	0.004799
IN-box	840	844	SKPRY		650.362000	all-P	3.000000	653.098229	0.069406	2.379697	0.069524	5.266801	0.018828
IN-box	840	844	SKPRY		650.362000	all-P	10.000000	653.048915	0.028130	2.330382	0.028419	5.256002	0.016249
IN-box	840	844	SKPRY		650.362000	all-P	30.000002	653.092278	0.084997	2.373745	0.085093	5.269995	0.020658
IN-box	840	844	SKPRY		650.362000	all-P	90.000008	653.049134	0.037304	2.330602	0.037522	5.278723	0.017970
IN-box	840	844	SKPRY		650.362000	no-P	0.000000	650.718533	0.004043	0.000000	0.000000	5.275732	0.004799
IN-box	840	844	SKPRY		650.362000	no-P	3.000000	653.116814	0.028472	2.398281	0.028757	5.268877	0.012197
IN-box	840	844	SKPRY		650.362000	no-P	10.000000	653.090397	0.043808	2.371865	0.043995	5.261035	0.015840
IN-box	840	844	SKPRY		650.362000	no-P	30.000002	653.023198	0.059009	2.304665	0.059147	5.270035	0.015760
IN-box	840	844	SKPRY		650.362000	no-P	90.000008	653.089992	0.039213	2.371460	0.039421	5.280453	0.004635
IN-box	841	844	KPRY		563.330000	all-P	0.000000	563.572298	0.026543	0.000000	0.000000	5.274629	0.002897
IN-box	841	844	KPRY		563.330000	all-P	3.000000	565.613750	0.108550	2.041452	0.111748	5.263090	0.017657
IN-box	841	844	KPRY		563.330000	all-P	10.000000	565.491691	0.047692	1.919393	0.054580	5.252124	0.015490
IN-box	841	844	KPRY		563.330000	all-P	30.000002	565.515564	0.054865	1.943266	0.060948	5.272383	0.020170
IN-box	841	844	KPRY		563.330000	all-P	90.000008	565.501619	0.091225	1.929321	0.095008	5.273757	0.012908
IN-box	841	844	KPRY		563.330000	no-P	0.000000	563.572298	0.026543	0.000000	0.000000	5.274629	0.002897
IN-box	841	844	KPRY		563.330000	no-P	3.000000	565.577480	0.095340	2.005182	0.098965	5.268620	0.010959
IN-box	841	844	KPRY		563.330000	no-P	10.000000	565.619804	0.056077	2.047506	0.062042	5.261724	0.017685
IN-box	841	844	KPRY		563.330000	no-P	30.000002	565.488979	0.049228	1.916682	0.055927	5.266896	0.019249
IN-box	841	844	KPRY		563.330000	no-P	90.000008	565.492269	0.093209	1.919971	0.096915	5.278934	0.007091
IN-box	844	849	YFKRTS		801.425400	all-P	0.000000	801.813577	0.043418	0.000000	0.000000	5.904016	0.005008
IN-box	844	849	YFKRTS		801.425400	all-P	3.000000	802.018443	0.074612	0.204866	0.086325	5.901680	0.019816
IN-box	844	849	YFKRTS		801.425400	all-P	10.000000	802.140495	0.146319	0.326918	0.152625	5.883046	0.017518
IN-box	844	849	YFKRTS		801.425400	all-P	30.000002	802.156563	0.113368	0.342986	0.121397	5.910712	0.015051
IN-box	844	849	YFKRTS		801.425400	all-P	90.000008	802.495191	0.111750	0.681614	0.119888	5.914699	0.013168
IN-box	844	849	YFKRTS		801.425400	no-P	0.000000	801.813577	0.043418	0.000000	0.000000	5.904016	0.005008
IN-box	844	849	YFKRTS		801.425400	no-P	3.000000	802.037584	0.102968	0.224007	0.111747	5.899933	0.015522
IN-box	844	849	YFKRTS		801.425400	no-P	10.000000	802.170489	0.151672	0.356913	0.157764	5.891378	0.014111
IN-box	844	849	YFKRTS		801.425400	no-P	30.000002	802.184226	0.102178	0.370649	0.111020	5.909655	0.012485
IN-box	844	849	YFKRTS		801.425400	no-P	90.000008	802.514191	0.069025	0.700614	0.081545	5.914263	0.005328
IN-box	852	864	VWHSPPLHHHHHH		1657.799600	all-P	0.000000	1658.714980	0.061155	0.000000	0.000000	5.395432	0.002251
IN-box	852	864	VWHSPPLHHHHHH		1657.799600	all-P	3.000000	1660.167327	0.122366	1.452347	0.136797	5.409315	0.019621
IN-box	852	864	VWHSPPLHHHHHH		1657.799600	all-P	10.000000	1660.176722	0.052480	1.461742	0.080586	5.394559	0.013866
IN-box	852	864	VWHSPPLHHHHHH		1657.799600	all-P	30.000002	1660.342692	0.057075	1.627712	0.083651	5.406060	0.017525
IN-box	852	864	VWHSPPLHHHHHH		1657.799600	all-P	90.000008	1660.360666	0.106647	1.645686	0.122937	5.430041	0.026115
IN-box	852	864	VWHSPPLHHHHHH		1657.799600	no-P	0.000000	1658.714980	0.061155	0.000000	0.000000	5.395432	0.002251
IN-box	852	864	VWHSPPLHHHHHH		1657.799600	no-P	3.000000	1660.671526	0.128255	1.956546	0.142089	5.375189	0.015801
IN-box	852	864	VWHSPPLHHHHHH		1657.799600	no-P	10.000000	1660.733139	0.105613	2.018158	0.122041	5.362201	0.018310
IN-box	852	864	VWHSPPLHHHHHH		1657.799600	no-P	30.000002	1660.688010	0.074513	1.973030	0.096396	5.366147	0.011022
IN-box	852	864	VWHSPPLHHHHHH		1657.799600	no-P	90.000008	1660.752733	0.078785	2.037753	0.099735	5.379267	0.005318
