# Supplementary material for: The structural basis of the multi-step allosteric activation of Aurora B kinase
Source: eLife. 2023 May 25;12:e85328. doi: 10.7554/eLife.85328 (PMC10259393; doi:10.7554/eLife.85328)
Supplement: Supplementary file 3. [file elife-85328-supp3.xlsx]

## Sheet: Table S3
TABLE S3
HDX-MS summary for [Aurora B/IN-box]all-P(asterisk), [Aurora B/IN-box]no-P(asterisk), [Aurora B/IN-box]loop-P, [Aurora B/IN-box]IN-P
Data Set	all-P	no-P	loop-P	IN-P
HDX reaction details	20 mM HEPES, 300 mM NaCl,2mM MgCl2, 1mM ADP pDread = 7.0, 25 °C	20 mM HEPES, 300 mM NaCl,2mM MgCl2, 1mM ADP pDread = 7.0, 25 °C	20 mM HEPES, 300 mM NaCl,2mM MgCl2, 1mM ADP pDread = 7.0, 25 °C	20 mM HEPES, 300 mM NaCl,2mM MgCl2, 1mM ADP pDread = 7.0, 25 °C
HDX time course (min)	3.0, 10, 30, 90, 300,	3.0, 10, 30, 90, 300	3.0, 10, 30, 90, 300	3.0, 10, 30, 90, 300
HDX control samples	Maximally-labeled control	Maximally-labeled control	Maximally-labeled control	Maximally-labeled control
Back-exchange (mean / IQR)	37.0% / 13.0%
# of Peptides	143	151	152	115
Sequence coverage	0.96	0.97	1	1
Average peptide length / Redundancy	11/4.15	11/4.3	11/4.15	11/4.5
Replicates (biological or technical)	2 (technical)	2 (technical)	2 (technical)	2 (technical)
Repeatability	0.0635 (average standard deviation)	0.0746 (average standard deviation)	0.0737 (average standard deviation)	0.0666 (average standard deviation)
Significant differences in HDX (delta HDX > X D)	0.38 D (95% CI)
