# Supplementary material for: The structural basis of the multi-step allosteric activation of Aurora B kinase
Source: eLife. 2023 May 25;12:e85328. doi: 10.7554/eLife.85328 (PMC10259393; doi:10.7554/eLife.85328)
Supplement: Supplementary file 4. [file elife-85328-supp4.xlsx]

## Sheet: Table S4
Table S4. HDX data for [Aurora B/IN-box]all-P(astr)(asterisk) and [Aurora B/IN-box]no-P(astr)(asterisk), [Aurora B/IN-box]loop-P and [Aurora B/IN-box]IN-P
Protein	Start	End	Sequence	Modification	Peptide mass (Da)	State	Exposure	Center	Center SD	Uptake	Uptake SD	RT	RT SD
Aurora B	59	81	GSSSVPGRVAVSTEMPSQNTALA	Oxidation M (15)	2262.103000	all-P(astr)	0.000000	2263.489327	0.106274	0.000000	0.000000	7.468680	0.004584
Aurora B	59	81	GSSSVPGRVAVSTEMPSQNTALA	Oxidation M (15)	2262.103000	all-P(astr)	3.000000	2276.694822	0.257913	13.205495	0.278950	7.479339	0.048393
Aurora B	59	81	GSSSVPGRVAVSTEMPSQNTALA	Oxidation M (15)	2262.103000	all-P(astr)	10.000000	2276.814014	0.243486	13.324687	0.265668	7.483797	0.042663
Aurora B	59	81	GSSSVPGRVAVSTEMPSQNTALA	Oxidation M (15)	2262.103000	all-P(astr)	30.000002	2276.945049	0.099669	13.455723	0.145699	7.495197	0.047107
Aurora B	59	81	GSSSVPGRVAVSTEMPSQNTALA	Oxidation M (15)	2262.103000	all-P(astr)	90.000008	2276.651874	0.382829	13.162548	0.397307	7.485757	0.039736
Aurora B	59	81	GSSSVPGRVAVSTEMPSQNTALA	Oxidation M (15)	2262.103000	all-P(astr)	300.000000	2276.699494	0.396830	13.210168	0.410814	7.480319	0.042884
Aurora B	59	81	GSSSVPGRVAVSTEMPSQNTALA	Oxidation M (15)	2262.103000	all-P(astr)	MAX	2278.651141	0.114477	15.161814	0.156202	7.550379	0.001880
Aurora B	59	81	GSSSVPGRVAVSTEMPSQNTALA	Oxidation M (15)	2262.103000	no-P(astr)	0.000000	2263.539115	0.100329	0.000000	0.000000	7.468365	0.003326
Aurora B	59	81	GSSSVPGRVAVSTEMPSQNTALA	Oxidation M (15)	2262.103000	no-P(astr)	3.000000	2276.460569	0.463664	12.921454	0.474395	7.490098	0.030636
Aurora B	59	81	GSSSVPGRVAVSTEMPSQNTALA	Oxidation M (15)	2262.103000	no-P(astr)	10.000000	2276.588354	0.386709	13.049239	0.399512	7.487516	0.042314
Aurora B	59	81	GSSSVPGRVAVSTEMPSQNTALA	Oxidation M (15)	2262.103000	no-P(astr)	30.000002	2276.629417	0.434709	13.090302	0.446137	7.485462	0.043285
Aurora B	59	81	GSSSVPGRVAVSTEMPSQNTALA	Oxidation M (15)	2262.103000	no-P(astr)	90.000008	2276.674494	0.323780	13.135380	0.338968	7.486021	0.044034
Aurora B	59	81	GSSSVPGRVAVSTEMPSQNTALA	Oxidation M (15)	2262.103000	no-P(astr)	300.000000	2276.662725	0.386907	13.123610	0.399704	7.490186	0.041201
Aurora B	59	81	GSSSVPGRVAVSTEMPSQNTALA	Oxidation M (15)	2262.103000	no-P(astr)	MAX	2278.651141	0.114477	15.112026	0.152220	7.550379	0.001880
Aurora B	59	81	GSSSVPGRVAVSTEMPSQNTALA	Oxidation M (15)	2262.103000	loop-P	0.000000	2263.508618	0.124856	0.000000	0.000000	7.460046	0.001954
Aurora B	59	81	GSSSVPGRVAVSTEMPSQNTALA	Oxidation M (15)	2262.103000	loop-P	3.000000	2276.720665	0.368373	13.212046	0.388957	7.489538	0.043014
Aurora B	59	81	GSSSVPGRVAVSTEMPSQNTALA	Oxidation M (15)	2262.103000	loop-P	10.000000	2276.973520	0.313220	13.464901	0.337188	7.488061	0.049633
Aurora B	59	81	GSSSVPGRVAVSTEMPSQNTALA	Oxidation M (15)	2262.103000	loop-P	30.000002	2276.957011	0.358525	13.448393	0.379643	7.484341	0.039121
Aurora B	59	81	GSSSVPGRVAVSTEMPSQNTALA	Oxidation M (15)	2262.103000	loop-P	90.000008	2276.679472	0.418723	13.170854	0.436942	7.490170	0.040863
Aurora B	59	81	GSSSVPGRVAVSTEMPSQNTALA	Oxidation M (15)	2262.103000	loop-P	300.000000	2276.598840	0.481791	13.090222	0.497706	7.483396	0.037218
Aurora B	59	81	GSSSVPGRVAVSTEMPSQNTALA	Oxidation M (15)	2262.103000	loop-P	MAX	2278.651141	0.114477	15.142522	0.169393	7.550379	0.001880
Aurora B	59	81	GSSSVPGRVAVSTEMPSQNTALA	Oxidation M (15)	2262.103000	IN-P	0.000000	2263.628120	0.154114	0.000000	0.000000	7.462710	0.004346
Aurora B	59	81	GSSSVPGRVAVSTEMPSQNTALA	Oxidation M (15)	2262.103000	IN-P	3.000000	2276.915203	0.241595	13.287083	0.286565	7.481400	0.039823
Aurora B	59	81	GSSSVPGRVAVSTEMPSQNTALA	Oxidation M (15)	2262.103000	IN-P	10.000000	2277.005241	0.297844	13.377120	0.335354	7.487479	0.038672
Aurora B	59	81	GSSSVPGRVAVSTEMPSQNTALA	Oxidation M (15)	2262.103000	IN-P	30.000002	2276.975482	0.241704	13.347362	0.286657	7.480660	0.033168
Aurora B	59	81	GSSSVPGRVAVSTEMPSQNTALA	Oxidation M (15)	2262.103000	IN-P	90.000008	2276.896000	0.455962	13.267879	0.481303	7.475749	0.037593
Aurora B	59	81	GSSSVPGRVAVSTEMPSQNTALA	Oxidation M (15)	2262.103000	IN-P	300.000000	2277.053674	0.181603	13.425554	0.238182	7.480856	0.037190
Aurora B	59	81	GSSSVPGRVAVSTEMPSQNTALA	Oxidation M (15)	2262.103000	IN-P	MAX	2278.651141	0.114477	15.023020	0.191979	7.550379	0.001880
Aurora B	64	70	PGRVAVS		685.399200	all-P(astr)	0.000000	685.722561	0.007873	0.000000	0.000000	5.578188	0.001782
Aurora B	64	70	PGRVAVS		685.399200	all-P(astr)	3.000000	689.590787	0.073133	3.868226	0.073556	5.571256	0.022850
Aurora B	64	70	PGRVAVS		685.399200	all-P(astr)	10.000000	689.650247	0.035500	3.927686	0.036363	5.578535	0.020921
Aurora B	64	70	PGRVAVS		685.399200	all-P(astr)	30.000002	689.546393	0.130474	3.823831	0.130712	5.582553	0.024725
Aurora B	64	70	PGRVAVS		685.399200	all-P(astr)	90.000008	689.593186	0.077967	3.870625	0.078363	5.576791	0.015872
Aurora B	64	70	PGRVAVS		685.399200	all-P(astr)	300.000000	689.695862	0.073861	3.973300	0.074280	5.577623	0.018741
Aurora B	64	70	PGRVAVS		685.399200	all-P(astr)	MAX	689.905646	0.036667	4.183084	0.037503	5.603427	0.003276
Aurora B	64	70	PGRVAVS		685.399200	no-P(astr)	0.000000	685.705637	0.014202	0.000000	0.000000	5.571915	0.000473
Aurora B	64	70	PGRVAVS		685.399200	no-P(astr)	3.000000	689.656973	0.059461	3.951336	0.061133	5.573496	0.021148
Aurora B	64	70	PGRVAVS		685.399200	no-P(astr)	10.000000	689.676394	0.047600	3.970757	0.049674	5.584260	0.021546
Aurora B	64	70	PGRVAVS		685.399200	no-P(astr)	30.000002	689.687025	0.060842	3.981388	0.062477	5.576818	0.023500
Aurora B	64	70	PGRVAVS		685.399200	no-P(astr)	90.000008	689.528173	0.028305	3.822536	0.031668	5.579494	0.022209
Aurora B	64	70	PGRVAVS		685.399200	no-P(astr)	300.000000	689.709194	0.030990	4.003557	0.034089	5.582232	0.020216
Aurora B	64	70	PGRVAVS		685.399200	no-P(astr)	MAX	689.905646	0.036667	4.200009	0.039322	5.603427	0.003276
Aurora B	64	70	PGRVAVS		685.399200	loop-P	0.000000	685.719529	0.011906	0.000000	0.000000	5.571651	0.003632
Aurora B	64	70	PGRVAVS		685.399200	loop-P	3.000000	689.727495	0.097502	4.007965	0.098227	5.583734	0.018805
Aurora B	64	70	PGRVAVS		685.399200	loop-P	10.000000	689.690180	0.005516	3.970651	0.013122	5.583900	0.023898
Aurora B	64	70	PGRVAVS		685.399200	loop-P	30.000002	689.641658	0.124388	3.922128	0.124957	5.577943	0.018400
Aurora B	64	70	PGRVAVS		685.399200	loop-P	90.000008	689.595032	0.140784	3.875503	0.141287	5.581175	0.020881
Aurora B	64	70	PGRVAVS		685.399200	loop-P	300.000000	689.674253	0.050037	3.954723	0.051434	5.575238	0.015889
Aurora B	64	70	PGRVAVS		685.399200	loop-P	MAX	689.905646	0.036667	4.186116	0.038552	5.603427	0.003276
Aurora B	64	70	PGRVAVS		685.399200	IN-P	0.000000	685.721408	0.013055	0.000000	0.000000	5.577660	0.003814
Aurora B	64	70	PGRVAVS		685.399200	IN-P	3.000000	689.632096	0.034954	3.910689	0.037313	5.576889	0.017990
Aurora B	64	70	PGRVAVS		685.399200	IN-P	10.000000	689.648059	0.076059	3.926651	0.077171	5.580524	0.023480
Aurora B	64	70	PGRVAVS		685.399200	IN-P	30.000002	689.643431	0.052972	3.922023	0.054557	5.578011	0.016632
Aurora B	64	70	PGRVAVS		685.399200	IN-P	90.000008	689.646859	0.066050	3.925451	0.067328	5.573444	0.017691
Aurora B	64	70	PGRVAVS		685.399200	IN-P	300.000000	689.542268	0.088874	3.820861	0.089827	5.577802	0.019025
Aurora B	64	70	PGRVAVS		685.399200	IN-P	MAX	689.905646	0.036667	4.184238	0.038922	5.603427	0.003276
Aurora B	71	77	TEMPSQN		806.334900	all-P(astr)	0.000000	806.544333	0.121669	0.000000	0.000000	4.670566	0.004242
Aurora B	71	77	TEMPSQN		806.334900	all-P(astr)	3.000000	809.323428	0.002748	2.779095	0.121700	4.690262	0.028371
Aurora B	71	77	TEMPSQN		806.334900	all-P(astr)	10.000000	809.259714	0.001235	2.715381	0.121675	4.691698	0.022680
Aurora B	71	77	TEMPSQN		806.334900	all-P(astr)	30.000002	809.347632	0.151781	2.803299	0.194527	4.688067	0.020700
Aurora B	71	77	TEMPSQN		806.334900	all-P(astr)	90.000008	809.326083	0.006326	2.781749	0.121833	4.688081	0.013876
Aurora B	71	77	TEMPSQN		806.334900	all-P(astr)	300.000000	809.279548	0.109218	2.735215	0.163498	4.692864	0.024657
Aurora B	71	77	TEMPSQN		806.334900	all-P(astr)	MAX	809.455017	0.039788	2.910684	0.128009	4.715502	0.001896
Aurora B	71	77	TEMPSQN		806.334900	no-P(astr)	0.000000	806.621807	0.023713	0.000000	0.000000	4.665030	0.008281
Aurora B	71	77	TEMPSQN		806.334900	no-P(astr)	3.000000	809.159810	0.093980	2.538004	0.096925	4.683657	0.024432
Aurora B	71	77	TEMPSQN		806.334900	no-P(astr)	10.000000	809.129542	0.133049	2.507735	0.135146	4.697468	0.014596
Aurora B	71	77	TEMPSQN		806.334900	no-P(astr)	30.000002	809.313207	0.050151	2.691400	0.055474	4.694820	0.018650
Aurora B	71	77	TEMPSQN		806.334900	no-P(astr)	90.000008	809.201549	0.052010	2.579742	0.057161	4.688930	0.024294
Aurora B	71	77	TEMPSQN		806.334900	no-P(astr)	300.000000	809.275479	0.068040	2.653672	0.072054	4.694882	0.016742
Aurora B	71	77	TEMPSQN		806.334900	no-P(astr)	MAX	809.455017	0.039788	2.833210	0.046318	4.715502	0.001896
Aurora B	71	77	TEMPSQN		806.334900	loop-P	0.000000	806.657919	0.100175	0.000000	0.000000	4.663971	0.004524
Aurora B	71	77	TEMPSQN		806.334900	loop-P	3.000000	809.285893	0.064287	2.627975	0.119028	4.702170	0.021909
Aurora B	71	77	TEMPSQN		806.334900	loop-P	10.000000	809.279216	0.024793	2.621297	0.103197	4.688183	0.026427
Aurora B	71	77	TEMPSQN		806.334900	loop-P	30.000002	809.372924	0.016750	2.715006	0.101565	4.696683	0.017682
Aurora B	71	77	TEMPSQN		806.334900	loop-P	90.000008	809.337884	0.022757	2.679966	0.102727	4.700554	0.019536
Aurora B	71	77	TEMPSQN		806.334900	loop-P	300.000000	809.341097	0.038839	2.683179	0.107440	4.682958	0.015942
Aurora B	71	77	TEMPSQN		806.334900	loop-P	MAX	809.455017	0.039788	2.797099	0.107787	4.715502	0.001896
Aurora B	71	77	TEMPSQN		806.334900	IN-P	0.000000	806.774335	0.038996	0.000000	0.000000	4.674378	0.005831
Aurora B	71	77	TEMPSQN		806.334900	IN-P	3.000000	809.240413	0.070648	2.466079	0.080696	4.686512	0.019061
Aurora B	71	77	TEMPSQN		806.334900	IN-P	10.000000	809.274621	0.029471	2.500286	0.048879	4.692718	0.040640
Aurora B	71	77	TEMPSQN		806.334900	IN-P	30.000002	809.285695	0.104833	2.511360	0.111851	4.688400	0.014053
Aurora B	71	77	TEMPSQN		806.334900	IN-P	90.000008	809.324529	0.010606	2.550195	0.040412	4.686583	0.021891
Aurora B	71	77	TEMPSQN		806.334900	IN-P	300.000000	809.298342	0.073513	2.524007	0.083215	4.697086	0.016144
Aurora B	71	77	TEMPSQN		806.334900	IN-P	MAX	809.455017	0.039788	2.680683	0.055711	4.715502	0.001896
Aurora B	71	80	TEMPSQNTAL		1091.503700	all-P(astr)	0.000000	1092.000839	0.029426	0.000000	0.000000	6.939363	0.002295
Aurora B	71	80	TEMPSQNTAL		1091.503700	all-P(astr)	3.000000	1097.546172	0.035821	5.545332	0.046358	6.960759	0.044142
Aurora B	71	80	TEMPSQNTAL		1091.503700	all-P(astr)	10.000000	1097.543804	0.024676	5.542965	0.038403	6.967754	0.035285
Aurora B	71	80	TEMPSQNTAL		1091.503700	all-P(astr)	30.000002	1097.563946	0.020842	5.563107	0.036059	6.979404	0.042081
Aurora B	71	80	TEMPSQNTAL		1091.503700	all-P(astr)	90.000008	1097.586397	0.048519	5.585557	0.056744	6.967553	0.030319
Aurora B	71	80	TEMPSQNTAL		1091.503700	all-P(astr)	300.000000	1097.572421	0.030515	5.571582	0.042392	6.970977	0.038069
Aurora B	71	80	TEMPSQNTAL		1091.503700	all-P(astr)	MAX	1097.977833	0.034511	5.976993	0.045353	7.023030	0.002733
Aurora B	71	80	TEMPSQNTAL		1091.503700	no-P(astr)	0.000000	1092.425068	0.103192	0.000000	0.000000	6.937312	0.001378
Aurora B	71	80	TEMPSQNTAL		1091.503700	no-P(astr)	3.000000	1097.091777	0.157656	4.666709	0.188425	6.971570	0.030977
Aurora B	71	80	TEMPSQNTAL		1091.503700	no-P(astr)	10.000000	1097.064832	0.211340	4.639763	0.235188	6.976333	0.039184
Aurora B	71	80	TEMPSQNTAL		1091.503700	no-P(astr)	30.000002	1097.075981	0.210021	4.650913	0.234003	6.969027	0.039281
Aurora B	71	80	TEMPSQNTAL		1091.503700	no-P(astr)	90.000008	1097.148656	0.122933	4.723587	0.160503	6.969824	0.041930
Aurora B	71	80	TEMPSQNTAL		1091.503700	no-P(astr)	300.000000	1097.177738	0.142309	4.752670	0.175785	6.972316	0.037280
Aurora B	71	80	TEMPSQNTAL		1091.503700	no-P(astr)	MAX	1097.474502	0.145420	5.049434	0.178314	7.022881	0.003089
Aurora B	71	80	TEMPSQNTAL		1091.503700	loop-P	0.000000	1092.031044	0.014582	0.000000	0.000000	6.931121	0.002524
Aurora B	71	80	TEMPSQNTAL		1091.503700	loop-P	3.000000	1097.679141	0.035422	5.648097	0.038306	6.979764	0.037111
Aurora B	71	80	TEMPSQNTAL		1091.503700	loop-P	10.000000	1097.628381	0.028442	5.597337	0.031962	6.980603	0.043438
Aurora B	71	80	TEMPSQNTAL		1091.503700	loop-P	30.000002	1097.583547	0.020998	5.552504	0.025564	6.975018	0.032501
Aurora B	71	80	TEMPSQNTAL		1091.503700	loop-P	90.000008	1097.628536	0.027394	5.597492	0.031033	6.974476	0.035966
Aurora B	71	80	TEMPSQNTAL		1091.503700	loop-P	300.000000	1097.561342	0.008386	5.530299	0.016821	6.969802	0.032384
Aurora B	71	80	TEMPSQNTAL		1091.503700	loop-P	MAX	1097.977833	0.034511	5.946789	0.037465	7.023030	0.002733
Aurora B	71	80	TEMPSQNTAL		1091.503700	IN-P	0.000000	1092.587749	0.219169	0.000000	0.000000	6.934779	0.003483
Aurora B	71	80	TEMPSQNTAL		1091.503700	IN-P	3.000000	1097.216398	0.147034	4.628649	0.263920	6.964333	0.038592
Aurora B	71	80	TEMPSQNTAL		1091.503700	IN-P	10.000000	1097.226835	0.154743	4.639086	0.268291	6.971212	0.039561
Aurora B	71	80	TEMPSQNTAL		1091.503700	IN-P	30.000002	1097.231388	0.146735	4.643640	0.263754	6.968013	0.033991
Aurora B	71	80	TEMPSQNTAL		1091.503700	IN-P	90.000008	1097.237999	0.142387	4.650251	0.261360	6.963335	0.037222
Aurora B	71	80	TEMPSQNTAL		1091.503700	IN-P	300.000000	1097.196171	0.140296	4.608423	0.260227	6.965922	0.035044
Aurora B	71	80	TEMPSQNTAL		1091.503700	IN-P	MAX	1097.474502	0.145420	4.886753	0.263025	7.022881	0.003089
Aurora B	74	80	PSQNTAL		730.373000	all-P(astr)	0.000000	730.700188	0.011530	0.000000	0.000000	5.901021	0.001387
Aurora B	74	80	PSQNTAL		730.373000	all-P(astr)	3.000000	734.636414	0.009325	3.936226	0.014829	5.917301	0.028913
Aurora B	74	80	PSQNTAL		730.373000	all-P(astr)	10.000000	734.612859	0.035420	3.912671	0.037249	5.919316	0.025388
Aurora B	74	80	PSQNTAL		730.373000	all-P(astr)	30.000002	734.631066	0.008660	3.930878	0.014420	5.925662	0.028996
Aurora B	74	80	PSQNTAL		730.373000	all-P(astr)	90.000008	734.640488	0.070283	3.940300	0.071223	5.917397	0.020212
Aurora B	74	80	PSQNTAL		730.373000	all-P(astr)	300.000000	734.673500	0.068092	3.973311	0.069062	5.919974	0.022801
Aurora B	74	80	PSQNTAL		730.373000	all-P(astr)	MAX	734.908765	0.006071	4.208577	0.013031	5.952123	0.003464
Aurora B	74	80	PSQNTAL		730.373000	no-P(astr)	0.000000	730.699138	0.012429	0.000000	0.000000	5.896796	0.004197
Aurora B	74	80	PSQNTAL		730.373000	no-P(astr)	3.000000	734.573625	0.027596	3.874487	0.030266	5.919493	0.023729
Aurora B	74	80	PSQNTAL		730.373000	no-P(astr)	10.000000	734.607666	0.007393	3.908528	0.014462	5.927312	0.025424
Aurora B	74	80	PSQNTAL		730.373000	no-P(astr)	30.000002	734.630338	0.028039	3.931200	0.030670	5.921962	0.028005
Aurora B	74	80	PSQNTAL		730.373000	no-P(astr)	90.000008	734.595334	0.031522	3.896196	0.033884	5.918571	0.027031
Aurora B	74	80	PSQNTAL		730.373000	no-P(astr)	300.000000	734.637149	0.065560	3.938011	0.066728	5.924884	0.022347
Aurora B	74	80	PSQNTAL		730.373000	no-P(astr)	MAX	734.908765	0.006071	4.209627	0.013833	5.952123	0.003464
Aurora B	74	80	PSQNTAL		730.373000	loop-P	0.000000	730.696678	0.007563	0.000000	0.000000	5.900765	0.002155
Aurora B	74	80	PSQNTAL		730.373000	loop-P	3.000000	734.637154	0.034829	3.940476	0.035641	5.926775	0.024405
Aurora B	74	80	PSQNTAL		730.373000	loop-P	10.000000	734.667699	0.072486	3.971020	0.072880	5.922255	0.029908
Aurora B	74	80	PSQNTAL		730.373000	loop-P	30.000002	734.645690	0.020672	3.949011	0.022012	5.920601	0.020704
Aurora B	74	80	PSQNTAL		730.373000	loop-P	90.000008	734.651752	0.025894	3.955073	0.026976	5.923711	0.025881
Aurora B	74	80	PSQNTAL		730.373000	loop-P	300.000000	734.639299	0.004155	3.942621	0.008630	5.915871	0.018894
Aurora B	74	80	PSQNTAL		730.373000	loop-P	MAX	734.908765	0.006071	4.212087	0.009699	5.952123	0.003464
Aurora B	74	80	PSQNTAL		730.373000	IN-P	0.000000	730.730864	0.013928	0.000000	0.000000	5.908350	0.003704
Aurora B	74	80	PSQNTAL		730.373000	IN-P	3.000000	734.693171	0.050908	3.962307	0.052779	5.919456	0.023430
Aurora B	74	80	PSQNTAL		730.373000	IN-P	10.000000	734.668347	0.028957	3.937483	0.032133	5.921529	0.030628
Aurora B	74	80	PSQNTAL		730.373000	IN-P	30.000002	734.667034	0.023515	3.936170	0.027330	5.920105	0.019617
Aurora B	74	80	PSQNTAL		730.373000	IN-P	90.000008	734.660381	0.005849	3.929517	0.015107	5.914574	0.024351
Aurora B	74	80	PSQNTAL		730.373000	IN-P	300.000000	734.628622	0.012615	3.897757	0.018792	5.922760	0.019857
Aurora B	74	80	PSQNTAL		730.373000	IN-P	MAX	734.908765	0.006071	4.177901	0.015194	5.952123	0.003464
Aurora B	80	92	LAEMPKRKFTIDD		1563.819900	all-P(astr)	0.000000	1564.694980	0.128680	0.000000	0.000000	7.112980	0.003465
Aurora B	80	92	LAEMPKRKFTIDD		1563.819900	all-P(astr)	3.000000	1570.830533	0.079067	6.135553	0.151030	7.110686	0.030637
Aurora B	80	92	LAEMPKRKFTIDD		1563.819900	all-P(astr)	10.000000	1570.958429	0.083323	6.263449	0.153301	7.113433	0.025429
Aurora B	80	92	LAEMPKRKFTIDD		1563.819900	all-P(astr)	30.000002	1571.020208	0.070453	6.325228	0.146704	7.124007	0.027007
Aurora B	80	92	LAEMPKRKFTIDD		1563.819900	all-P(astr)	90.000008	1571.189678	0.125665	6.494697	0.179861	7.110389	0.019316
Aurora B	80	92	LAEMPKRKFTIDD		1563.819900	all-P(astr)	300.000000	1571.586520	0.075329	6.891540	0.149107	7.110483	0.022820
Aurora B	80	92	LAEMPKRKFTIDD		1563.819900	all-P(astr)	MAX	1572.546545	0.147087	7.851565	0.195430	7.125207	0.001495
Aurora B	80	92	LAEMPKRKFTIDD		1563.819900	no-P(astr)	0.000000	1564.664257	0.124743	0.000000	0.000000	7.112502	0.003509
Aurora B	80	92	LAEMPKRKFTIDD		1563.819900	no-P(astr)	3.000000	1571.005378	0.092369	6.341121	0.155218	7.117317	0.014656
Aurora B	80	92	LAEMPKRKFTIDD		1563.819900	no-P(astr)	10.000000	1570.930656	0.088445	6.266399	0.152916	7.115733	0.024748
Aurora B	80	92	LAEMPKRKFTIDD		1563.819900	no-P(astr)	30.000002	1571.214966	0.049861	6.550709	0.134338	7.110650	0.024087
Aurora B	80	92	LAEMPKRKFTIDD		1563.819900	no-P(astr)	90.000008	1571.547430	0.034944	6.883174	0.129545	7.112282	0.026493
Aurora B	80	92	LAEMPKRKFTIDD		1563.819900	no-P(astr)	300.000000	1571.713439	0.134881	7.049182	0.183722	7.114281	0.022179
Aurora B	80	92	LAEMPKRKFTIDD		1563.819900	no-P(astr)	MAX	1572.546545	0.147087	7.882288	0.192861	7.125207	0.001495
Aurora B	80	92	LAEMPKRKFTIDD		1563.819900	loop-P	0.000000	1564.654474	0.078105	0.000000	0.000000	7.099625	0.003176
Aurora B	80	92	LAEMPKRKFTIDD		1563.819900	loop-P	3.000000	1571.033720	0.101889	6.379245	0.128381	7.117527	0.022588
Aurora B	80	92	LAEMPKRKFTIDD		1563.819900	loop-P	10.000000	1571.086908	0.050153	6.432434	0.092821	7.112988	0.032085
Aurora B	80	92	LAEMPKRKFTIDD		1563.819900	loop-P	30.000002	1571.149429	0.093180	6.494955	0.121585	7.114045	0.021670
Aurora B	80	92	LAEMPKRKFTIDD		1563.819900	loop-P	90.000008	1571.373449	0.094031	6.718975	0.122238	7.115494	0.025945
Aurora B	80	92	LAEMPKRKFTIDD		1563.819900	loop-P	300.000000	1571.658728	0.060832	7.004254	0.099000	7.108473	0.021517
Aurora B	80	92	LAEMPKRKFTIDD		1563.819900	loop-P	MAX	1572.546545	0.147087	7.892070	0.166538	7.125207	0.001495
Aurora B	80	92	LAEMPKRKFTIDD		1563.819900	IN-P	0.000000	1564.766430	0.054164	0.000000	0.000000	7.102523	0.003751
Aurora B	80	92	LAEMPKRKFTIDD		1563.819900	IN-P	3.000000	1570.828152	0.089467	6.061721	0.104585	7.108968	0.021280
Aurora B	80	92	LAEMPKRKFTIDD		1563.819900	IN-P	10.000000	1570.812207	0.061349	6.045777	0.081838	7.112913	0.024656
Aurora B	80	92	LAEMPKRKFTIDD		1563.819900	IN-P	30.000002	1570.911300	0.051468	6.144869	0.074717	7.110462	0.018525
Aurora B	80	92	LAEMPKRKFTIDD		1563.819900	IN-P	90.000008	1571.089808	0.071005	6.323378	0.089306	7.103560	0.022113
Aurora B	80	92	LAEMPKRKFTIDD		1563.819900	IN-P	300.000000	1571.398983	0.066146	6.632553	0.085493	7.110301	0.019091
Aurora B	80	92	LAEMPKRKFTIDD		1563.819900	IN-P	MAX	1572.546545	0.147087	7.780115	0.156743	7.125207	0.001495
Aurora B	81	92	AEMPKRKFTIDD		1450.735900	all-P(astr)	0.000000	1452.040550	0.136859	0.000000	0.000000	6.754434	0.002264
Aurora B	81	92	AEMPKRKFTIDD		1450.735900	all-P(astr)	3.000000	1456.948858	0.292239	4.908308	0.322698	6.744126	0.025961
Aurora B	81	92	AEMPKRKFTIDD		1450.735900	all-P(astr)	10.000000	1456.983806	0.303295	4.943256	0.332743	6.741823	0.018457
Aurora B	81	92	AEMPKRKFTIDD		1450.735900	all-P(astr)	30.000002	1457.105355	0.337697	5.064805	0.364376	6.751021	0.023912
Aurora B	81	92	AEMPKRKFTIDD		1450.735900	all-P(astr)	90.000008	1457.264365	0.346573	5.223815	0.372617	6.741516	0.016864
Aurora B	81	92	AEMPKRKFTIDD		1450.735900	all-P(astr)	300.000000	1457.531028	0.324026	5.490478	0.351743	6.740242	0.019122
Aurora B	81	92	AEMPKRKFTIDD		1450.735900	all-P(astr)	MAX	1458.354567	0.401068	6.314017	0.423776	6.747703	0.002083
Aurora B	81	92	AEMPKRKFTIDD		1450.735900	no-P(astr)	0.000000	1452.068507	0.132826	0.000000	0.000000	6.744472	0.002970
Aurora B	81	92	AEMPKRKFTIDD		1450.735900	no-P(astr)	3.000000	1456.971799	0.290908	4.903293	0.319797	6.750096	0.013116
Aurora B	81	92	AEMPKRKFTIDD		1450.735900	no-P(astr)	10.000000	1457.027733	0.336795	4.959226	0.362040	6.749431	0.021205
Aurora B	81	92	AEMPKRKFTIDD		1450.735900	no-P(astr)	30.000002	1457.241423	0.372639	5.172916	0.395604	6.742069	0.022874
Aurora B	81	92	AEMPKRKFTIDD		1450.735900	no-P(astr)	90.000008	1457.549397	0.363114	5.480890	0.386645	6.742744	0.021224
Aurora B	81	92	AEMPKRKFTIDD		1450.735900	no-P(astr)	300.000000	1457.644494	0.345096	5.575988	0.369776	6.745611	0.017155
Aurora B	81	92	AEMPKRKFTIDD		1450.735900	no-P(astr)	MAX	1458.354567	0.401068	6.286061	0.422491	6.747703	0.002083
Aurora B	81	92	AEMPKRKFTIDD		1450.735900	loop-P	0.000000	1452.071375	0.119510	0.000000	0.000000	6.737592	0.002348
Aurora B	81	92	AEMPKRKFTIDD		1450.735900	loop-P	3.000000	1457.079493	0.251322	5.008117	0.278290	6.746952	0.020575
Aurora B	81	92	AEMPKRKFTIDD		1450.735900	loop-P	10.000000	1457.114262	0.288259	5.042887	0.312051	6.745948	0.026786
Aurora B	81	92	AEMPKRKFTIDD		1450.735900	loop-P	30.000002	1457.173590	0.280453	5.102215	0.304855	6.742818	0.018128
Aurora B	81	92	AEMPKRKFTIDD		1450.735900	loop-P	90.000008	1457.408668	0.227288	5.337293	0.256792	6.746890	0.021171
Aurora B	81	92	AEMPKRKFTIDD		1450.735900	loop-P	300.000000	1457.628398	0.279607	5.557023	0.304077	6.741171	0.016221
Aurora B	81	92	AEMPKRKFTIDD		1450.735900	loop-P	MAX	1458.354567	0.401068	6.283192	0.418495	6.747703	0.002083
Aurora B	81	92	AEMPKRKFTIDD		1450.735900	IN-P	0.000000	1452.272740	0.160257	0.000000	0.000000	6.737952	0.003015
Aurora B	81	92	AEMPKRKFTIDD		1450.735900	IN-P	3.000000	1457.065130	0.294069	4.792389	0.334901	6.737509	0.017446
Aurora B	81	92	AEMPKRKFTIDD		1450.735900	IN-P	10.000000	1457.100330	0.254947	4.827590	0.301132	6.741373	0.021499
Aurora B	81	92	AEMPKRKFTIDD		1450.735900	IN-P	30.000002	1457.217092	0.290535	4.944351	0.331803	6.739754	0.015872
Aurora B	81	92	AEMPKRKFTIDD		1450.735900	IN-P	90.000008	1457.402666	0.290472	5.129925	0.331748	6.736094	0.017256
Aurora B	81	92	AEMPKRKFTIDD		1450.735900	IN-P	300.000000	1457.585294	0.315429	5.312553	0.353805	6.739491	0.016956
Aurora B	81	92	AEMPKRKFTIDD		1450.735900	IN-P	MAX	1458.354567	0.401068	6.081827	0.431901	6.747703	0.002083
Aurora B	81	93	AEMPKRKFTIDDF		1597.804300	all-P(astr)	0.000000	1598.951615	0.120781	0.000000	0.000000	8.602431	0.004112
Aurora B	81	93	AEMPKRKFTIDDF		1597.804300	all-P(astr)	3.000000	1603.913579	0.086206	4.961964	0.148390	8.592510	0.037994
Aurora B	81	93	AEMPKRKFTIDDF		1597.804300	all-P(astr)	10.000000	1604.017584	0.104643	5.065969	0.159807	8.590808	0.032188
Aurora B	81	93	AEMPKRKFTIDDF		1597.804300	all-P(astr)	30.000002	1604.134417	0.152418	5.182802	0.194472	8.602362	0.035459
Aurora B	81	93	AEMPKRKFTIDDF		1597.804300	all-P(astr)	90.000008	1604.299376	0.162736	5.347761	0.202660	8.592816	0.025055
Aurora B	81	93	AEMPKRKFTIDDF		1597.804300	all-P(astr)	300.000000	1604.615569	0.124284	5.663954	0.173305	8.592238	0.028159
Aurora B	81	93	AEMPKRKFTIDDF		1597.804300	all-P(astr)	MAX	1606.387629	0.171542	7.436014	0.209797	8.610691	0.002270
Aurora B	81	93	AEMPKRKFTIDDF		1597.804300	no-P(astr)	0.000000	1598.947429	0.125566	0.000000	0.000000	8.593085	0.004258
Aurora B	81	93	AEMPKRKFTIDDF		1597.804300	no-P(astr)	3.000000	1603.992875	0.110914	5.045446	0.167537	8.608061	0.012936
Aurora B	81	93	AEMPKRKFTIDDF		1597.804300	no-P(astr)	10.000000	1604.068789	0.104330	5.121360	0.163253	8.597218	0.031340
Aurora B	81	93	AEMPKRKFTIDDF		1597.804300	no-P(astr)	30.000002	1604.331984	0.179240	5.384555	0.218847	8.593952	0.032887
Aurora B	81	93	AEMPKRKFTIDDF		1597.804300	no-P(astr)	90.000008	1604.604329	0.148716	5.656900	0.194637	8.592184	0.031812
Aurora B	81	93	AEMPKRKFTIDDF		1597.804300	no-P(astr)	300.000000	1604.838509	0.155322	5.891080	0.199729	8.593211	0.026062
Aurora B	81	93	AEMPKRKFTIDDF		1597.804300	no-P(astr)	MAX	1606.387629	0.171542	7.440200	0.212588	8.610691	0.002270
Aurora B	81	93	AEMPKRKFTIDDF		1597.804300	loop-P	0.000000	1598.957958	0.134095	0.000000	0.000000	8.584489	0.001116
Aurora B	81	93	AEMPKRKFTIDDF		1597.804300	loop-P	3.000000	1604.091928	0.093202	5.133970	0.163304	8.600113	0.032531
Aurora B	81	93	AEMPKRKFTIDDF		1597.804300	loop-P	10.000000	1604.097726	0.148007	5.139768	0.199718	8.588048	0.036373
Aurora B	81	93	AEMPKRKFTIDDF		1597.804300	loop-P	30.000002	1604.227712	0.162449	5.269753	0.210645	8.593981	0.028178
Aurora B	81	93	AEMPKRKFTIDDF		1597.804300	loop-P	90.000008	1604.403497	0.148705	5.445539	0.200236	8.594213	0.031740
Aurora B	81	93	AEMPKRKFTIDDF		1597.804300	loop-P	300.000000	1604.759317	0.122567	5.801359	0.181671	8.589747	0.027502
Aurora B	81	93	AEMPKRKFTIDDF		1597.804300	loop-P	MAX	1606.387629	0.171542	7.429671	0.217734	8.610691	0.002270
Aurora B	81	93	AEMPKRKFTIDDF		1597.804300	IN-P	0.000000	1599.092154	0.179880	0.000000	0.000000	8.582662	0.004477
Aurora B	81	93	AEMPKRKFTIDDF		1597.804300	IN-P	3.000000	1604.021582	0.121778	4.929428	0.217225	8.588469	0.030363
Aurora B	81	93	AEMPKRKFTIDDF		1597.804300	IN-P	10.000000	1604.115481	0.195920	5.023327	0.265972	8.586874	0.033891
Aurora B	81	93	AEMPKRKFTIDDF		1597.804300	IN-P	30.000002	1604.149678	0.439513	5.057524	0.474898	8.576594	0.023887
Aurora B	81	93	AEMPKRKFTIDDF		1597.804300	IN-P	90.000008	1604.410220	0.137946	5.318066	0.226684	8.585158	0.027793
Aurora B	81	93	AEMPKRKFTIDDF		1597.804300	IN-P	300.000000	1604.643263	0.106143	5.551109	0.208861	8.589140	0.025929
Aurora B	81	93	AEMPKRKFTIDDF		1597.804300	IN-P	MAX	1606.387629	0.171542	7.295475	0.248563	8.610691	0.002270
Aurora B	82	92	EMPKRKFTIDD		1379.698800	all-P(astr)	0.000000	1380.497722	0.034470	0.000000	0.000000	6.754520	0.004857
Aurora B	82	92	EMPKRKFTIDD		1379.698800	all-P(astr)	3.000000	1384.812644	0.038813	4.314921	0.051910	6.741478	0.023082
Aurora B	82	92	EMPKRKFTIDD		1379.698800	all-P(astr)	10.000000	1384.826041	0.083217	4.328319	0.090074	6.738525	0.018944
Aurora B	82	92	EMPKRKFTIDD		1379.698800	all-P(astr)	30.000002	1384.927177	0.165835	4.429455	0.169379	6.749019	0.026460
Aurora B	82	92	EMPKRKFTIDD		1379.698800	all-P(astr)	90.000008	1385.108976	0.004408	4.611254	0.034750	6.738689	0.015368
Aurora B	82	92	EMPKRKFTIDD		1379.698800	all-P(astr)	300.000000	1385.282516	0.128058	4.784794	0.132616	6.741159	0.019117
Aurora B	82	92	EMPKRKFTIDD		1379.698800	all-P(astr)	MAX	1386.098806	0.004964	5.601083	0.034825	6.746859	0.001056
Aurora B	82	92	EMPKRKFTIDD		1379.698800	no-P(astr)	0.000000	1380.488822	0.035685	0.000000	0.000000	6.746299	0.003656
Aurora B	82	92	EMPKRKFTIDD		1379.698800	no-P(astr)	3.000000	1384.886865	0.027837	4.398043	0.045258	6.746439	0.010956
Aurora B	82	92	EMPKRKFTIDD		1379.698800	no-P(astr)	10.000000	1384.802504	0.191732	4.313682	0.195025	6.743184	0.020140
Aurora B	82	92	EMPKRKFTIDD		1379.698800	no-P(astr)	30.000002	1384.962935	0.277487	4.474113	0.279773	6.738657	0.021465
Aurora B	82	92	EMPKRKFTIDD		1379.698800	no-P(astr)	90.000008	1385.318603	0.043010	4.829781	0.055887	6.738854	0.019143
Aurora B	82	92	EMPKRKFTIDD		1379.698800	no-P(astr)	300.000000	1385.603512	0.105325	5.114690	0.111206	6.744656	0.016411
Aurora B	82	92	EMPKRKFTIDD		1379.698800	no-P(astr)	MAX	1386.098806	0.004964	5.609984	0.036029	6.746859	0.001056
Aurora B	82	92	EMPKRKFTIDD		1379.698800	loop-P	0.000000	1380.530875	0.022247	0.000000	0.000000	6.736675	0.002611
Aurora B	82	92	EMPKRKFTIDD		1379.698800	loop-P	3.000000	1385.084967	0.106321	4.554092	0.108623	6.748945	0.019265
Aurora B	82	92	EMPKRKFTIDD		1379.698800	loop-P	10.000000	1384.985999	0.219513	4.455123	0.220637	6.746895	0.026492
Aurora B	82	92	EMPKRKFTIDD		1379.698800	loop-P	30.000002	1384.992319	0.206213	4.461444	0.207409	6.742768	0.016283
Aurora B	82	92	EMPKRKFTIDD		1379.698800	loop-P	90.000008	1385.305483	0.179404	4.774608	0.180778	6.747093	0.021220
Aurora B	82	92	EMPKRKFTIDD		1379.698800	loop-P	300.000000	1385.494168	0.166019	4.963293	0.167503	6.741657	0.016362
Aurora B	82	92	EMPKRKFTIDD		1379.698800	loop-P	MAX	1386.098806	0.004964	5.567931	0.022794	6.746859	0.001056
Aurora B	82	92	EMPKRKFTIDD		1379.698800	IN-P	0.000000	1380.592612	0.016824	0.000000	0.000000	6.738248	0.003275
Aurora B	82	92	EMPKRKFTIDD		1379.698800	IN-P	3.000000	1385.098683	0.000000	4.506072	0.016824	6.747807	0.000000
Aurora B	82	92	EMPKRKFTIDD		1379.698800	IN-P	10.000000	1385.159673	0.147391	4.567061	0.148348	6.739855	0.021715
Aurora B	82	92	EMPKRKFTIDD		1379.698800	IN-P	30.000002	1385.189655	0.150514	4.597044	0.151451	6.735701	0.014680
Aurora B	82	92	EMPKRKFTIDD		1379.698800	IN-P	90.000008	1385.379082	0.202182	4.786470	0.202881	6.730775	0.018327
Aurora B	82	92	EMPKRKFTIDD		1379.698800	IN-P	300.000000	1385.542467	0.214830	4.949855	0.215488	6.738022	0.017317
Aurora B	82	92	EMPKRKFTIDD		1379.698800	IN-P	MAX	1386.098806	0.004964	5.506194	0.017541	6.746859	0.001056
Aurora B	93	107	FDIGRPLGKGKFGNV		1604.890700	all-P(astr)	0.000000	1605.757300	0.059022	0.000000	0.000000	8.113631	0.002342
Aurora B	93	107	FDIGRPLGKGKFGNV		1604.890700	all-P(astr)	3.000000	1611.181775	0.128100	5.424475	0.141044	8.118357	0.039092
Aurora B	93	107	FDIGRPLGKGKFGNV		1604.890700	all-P(astr)	10.000000	1611.592339	0.089899	5.835039	0.107542	8.123993	0.032465
Aurora B	93	107	FDIGRPLGKGKFGNV		1604.890700	all-P(astr)	30.000002	1612.213839	0.095431	6.456539	0.112208	8.130795	0.038088
Aurora B	93	107	FDIGRPLGKGKFGNV		1604.890700	all-P(astr)	90.000008	1612.835680	0.044800	7.078380	0.074099	8.120101	0.026225
Aurora B	93	107	FDIGRPLGKGKFGNV		1604.890700	all-P(astr)	300.000000	1613.506667	0.082120	7.749367	0.101130	8.118542	0.030975
Aurora B	93	107	FDIGRPLGKGKFGNV		1604.890700	all-P(astr)	MAX	1614.789331	0.075860	9.032031	0.096116	8.147404	8.632385E-5
Aurora B	93	107	FDIGRPLGKGKFGNV		1604.890700	no-P(astr)	0.000000	1605.747043	0.053685	0.000000	0.000000	8.107010	0.002142
Aurora B	93	107	FDIGRPLGKGKFGNV		1604.890700	no-P(astr)	3.000000	1611.545721	0.136915	5.798678	0.147064	8.132416	0.021021
Aurora B	93	107	FDIGRPLGKGKFGNV		1604.890700	no-P(astr)	10.000000	1611.853657	0.100264	6.106614	0.113732	8.130109	0.034218
Aurora B	93	107	FDIGRPLGKGKFGNV		1604.890700	no-P(astr)	30.000002	1612.922391	0.106454	7.175349	0.119225	8.120582	0.035238
Aurora B	93	107	FDIGRPLGKGKFGNV		1604.890700	no-P(astr)	90.000008	1613.264052	0.064919	7.517010	0.084241	8.123737	0.034083
Aurora B	93	107	FDIGRPLGKGKFGNV		1604.890700	no-P(astr)	300.000000	1613.595466	0.080043	7.848424	0.096379	8.124690	0.027661
Aurora B	93	107	FDIGRPLGKGKFGNV		1604.890700	no-P(astr)	MAX	1614.789331	0.075860	9.042288	0.092935	8.147404	8.632385E-5
Aurora B	93	107	FDIGRPLGKGKFGNV		1604.890700	loop-P	0.000000	1605.755812	0.044985	0.000000	0.000000	8.098948	0.002233
Aurora B	93	107	FDIGRPLGKGKFGNV		1604.890700	loop-P	3.000000	1611.376666	0.030033	5.620854	0.054089	8.129888	0.035843
Aurora B	93	107	FDIGRPLGKGKFGNV		1604.890700	loop-P	10.000000	1611.841954	0.068594	6.086142	0.082029	8.127000	0.038215
Aurora B	93	107	FDIGRPLGKGKFGNV		1604.890700	loop-P	30.000002	1612.352751	0.088520	6.596939	0.099295	8.122943	0.030155
Aurora B	93	107	FDIGRPLGKGKFGNV		1604.890700	loop-P	90.000008	1613.196442	0.026505	7.440631	0.052213	8.155893	0.001012
Aurora B	93	107	FDIGRPLGKGKFGNV		1604.890700	loop-P	300.000000	1613.567336	0.108424	7.811525	0.117386	8.120387	0.029287
Aurora B	93	107	FDIGRPLGKGKFGNV		1604.890700	loop-P	MAX	1614.789331	0.075860	9.033519	0.088195	8.147404	8.632385E-5
Aurora B	93	107	FDIGRPLGKGKFGNV		1604.890700	IN-P	0.000000	1605.887873	0.052804	0.000000	0.000000	8.100528	0.003522
Aurora B	93	107	FDIGRPLGKGKFGNV		1604.890700	IN-P	3.000000	1611.273256	0.165521	5.385383	0.173739	8.121052	0.032537
Aurora B	93	107	FDIGRPLGKGKFGNV		1604.890700	IN-P	10.000000	1611.662872	0.124360	5.774999	0.135106	8.125108	0.035245
Aurora B	93	107	FDIGRPLGKGKFGNV		1604.890700	IN-P	30.000002	1612.246664	0.085543	6.358791	0.100528	8.122150	0.031131
Aurora B	93	107	FDIGRPLGKGKFGNV		1604.890700	IN-P	90.000008	1613.087630	0.077849	7.199757	0.094068	8.077828	0.000737
Aurora B	93	107	FDIGRPLGKGKFGNV		1604.890700	IN-P	300.000000	1613.355414	0.072642	7.467541	0.089806	8.119011	0.029498
Aurora B	93	107	FDIGRPLGKGKFGNV		1604.890700	IN-P	MAX	1614.789331	0.075860	8.901458	0.092429	8.147404	8.632385E-5
Aurora B	93	108	FDIGRPLGKGKFGNVY		1767.954100	all-P(astr)	0.000000	1769.231284	0.181139	0.000000	0.000000	8.365506	0.003828
Aurora B	93	108	FDIGRPLGKGKFGNVY		1767.954100	all-P(astr)	3.000000	1774.276928	0.159576	5.045644	0.241404	8.371021	0.044963
Aurora B	93	108	FDIGRPLGKGKFGNVY		1767.954100	all-P(astr)	10.000000	1774.700802	0.133167	5.469518	0.224822	8.371041	0.034703
Aurora B	93	108	FDIGRPLGKGKFGNVY		1767.954100	all-P(astr)	30.000002	1775.276933	0.182957	6.045650	0.257458	8.377337	0.038010
Aurora B	93	108	FDIGRPLGKGKFGNVY		1767.954100	all-P(astr)	90.000008	1775.925889	0.196064	6.694605	0.266932	8.368399	0.027979
Aurora B	93	108	FDIGRPLGKGKFGNVY		1767.954100	all-P(astr)	300.000000	1776.420783	0.194758	7.189499	0.265974	8.370484	0.034510
Aurora B	93	108	FDIGRPLGKGKFGNVY		1767.954100	all-P(astr)	MAX	1778.599992	0.150440	9.368709	0.235465	8.401663	0.001552
Aurora B	93	108	FDIGRPLGKGKFGNVY		1767.954100	no-P(astr)	0.000000	1769.239248	0.182802	0.000000	0.000000	8.359647	0.002609
Aurora B	93	108	FDIGRPLGKGKFGNVY		1767.954100	no-P(astr)	3.000000	1774.519993	0.175548	5.280745	0.253444	8.386024	0.019188
Aurora B	93	108	FDIGRPLGKGKFGNVY		1767.954100	no-P(astr)	10.000000	1774.999955	0.135535	5.760708	0.227566	8.378018	0.035634
Aurora B	93	108	FDIGRPLGKGKFGNVY		1767.954100	no-P(astr)	30.000002	1775.844675	0.142105	6.605428	0.231539	8.370167	0.036903
Aurora B	93	108	FDIGRPLGKGKFGNVY		1767.954100	no-P(astr)	90.000008	1776.195140	0.247005	6.955893	0.307292	8.371291	0.038412
Aurora B	93	108	FDIGRPLGKGKFGNVY		1767.954100	no-P(astr)	300.000000	1776.472290	0.295194	7.233042	0.347212	8.374860	0.029358
Aurora B	93	108	FDIGRPLGKGKFGNVY		1767.954100	no-P(astr)	MAX	1778.599992	0.150440	9.360745	0.236747	8.401663	0.001552
Aurora B	93	108	FDIGRPLGKGKFGNVY		1767.954100	loop-P	0.000000	1769.244759	0.186527	0.000000	0.000000	8.348881	0.002990
Aurora B	93	108	FDIGRPLGKGKFGNVY		1767.954100	loop-P	3.000000	1774.432323	0.139086	5.187564	0.232674	8.379786	0.036034
Aurora B	93	108	FDIGRPLGKGKFGNVY		1767.954100	loop-P	10.000000	1774.923978	0.152421	5.679219	0.240883	8.372585	0.038817
Aurora B	93	108	FDIGRPLGKGKFGNVY		1767.954100	loop-P	30.000002	1775.497818	0.239971	6.253059	0.303939	8.374104	0.031592
Aurora B	93	108	FDIGRPLGKGKFGNVY		1767.954100	loop-P	90.000008	1776.075935	0.235327	6.831176	0.300285	8.376569	0.035668
Aurora B	93	108	FDIGRPLGKGKFGNVY		1767.954100	loop-P	300.000000	1776.478064	0.194881	7.233305	0.269761	8.369045	0.032844
Aurora B	93	108	FDIGRPLGKGKFGNVY		1767.954100	loop-P	MAX	1778.599992	0.150440	9.355234	0.239634	8.401663	0.001552
Aurora B	93	108	FDIGRPLGKGKFGNVY		1767.954100	IN-P	0.000000	1769.331527	0.193711	0.000000	0.000000	8.349276	0.005179
Aurora B	93	108	FDIGRPLGKGKFGNVY		1767.954100	IN-P	3.000000	1774.419071	0.197219	5.087543	0.276440	8.362559	0.033067
Aurora B	93	108	FDIGRPLGKGKFGNVY		1767.954100	IN-P	10.000000	1774.759595	0.178161	5.428068	0.263183	8.371154	0.037985
Aurora B	93	108	FDIGRPLGKGKFGNVY		1767.954100	IN-P	30.000002	1775.313390	0.253795	5.981863	0.319274	8.367023	0.032036
Aurora B	93	108	FDIGRPLGKGKFGNVY		1767.954100	IN-P	90.000008	1776.107933	0.234059	6.776405	0.303821	8.361352	0.033452
Aurora B	93	108	FDIGRPLGKGKFGNVY		1767.954100	IN-P	300.000000	1776.293757	0.214074	6.962229	0.288707	8.367688	0.031760
Aurora B	93	108	FDIGRPLGKGKFGNVY		1767.954100	IN-P	MAX	1778.599992	0.150440	9.268465	0.245267	8.401663	0.001552
Aurora B	93	109	FDIGRPLGKGKFGNVYL		1881.038100	all-P(astr)	0.000000	1882.365919	0.171207	0.000000	0.000000	9.169326	0.003995
Aurora B	93	109	FDIGRPLGKGKFGNVYL		1881.038100	all-P(astr)	3.000000	1887.301037	0.208317	4.935118	0.269644	9.170105	0.047106
Aurora B	93	109	FDIGRPLGKGKFGNVYL		1881.038100	all-P(astr)	10.000000	1887.699709	0.241552	5.333790	0.296073	9.176479	0.040003
Aurora B	93	109	FDIGRPLGKGKFGNVYL		1881.038100	all-P(astr)	30.000002	1888.350957	0.241413	5.985037	0.295960	9.185729	0.043765
Aurora B	93	109	FDIGRPLGKGKFGNVYL		1881.038100	all-P(astr)	90.000008	1888.929634	0.285510	6.563715	0.332909	9.177084	0.036286
Aurora B	93	109	FDIGRPLGKGKFGNVYL		1881.038100	all-P(astr)	300.000000	1889.403157	0.304659	7.037237	0.349470	9.178036	0.036576
Aurora B	93	109	FDIGRPLGKGKFGNVYL		1881.038100	all-P(astr)	MAX	1892.823452	0.081530	10.457533	0.189629	9.215621	0.001759
Aurora B	93	109	FDIGRPLGKGKFGNVYL		1881.038100	no-P(astr)	0.000000	1882.360385	0.161374	0.000000	0.000000	9.164688	0.002050
Aurora B	93	109	FDIGRPLGKGKFGNVYL		1881.038100	no-P(astr)	3.000000	1887.545508	0.234422	5.185122	0.284597	9.193730	0.017093
Aurora B	93	109	FDIGRPLGKGKFGNVYL		1881.038100	no-P(astr)	10.000000	1888.070629	0.201879	5.710244	0.258451	9.181921	0.041913
Aurora B	93	109	FDIGRPLGKGKFGNVYL		1881.038100	no-P(astr)	30.000002	1888.849928	0.312198	6.489543	0.351439	9.176621	0.040255
Aurora B	93	109	FDIGRPLGKGKFGNVYL		1881.038100	no-P(astr)	90.000008	1889.265204	0.325460	6.904819	0.363271	9.178111	0.038664
Aurora B	93	109	FDIGRPLGKGKFGNVYL		1881.038100	no-P(astr)	300.000000	1889.553063	0.365174	7.192678	0.399242	9.179252	0.036743
Aurora B	93	109	FDIGRPLGKGKFGNVYL		1881.038100	no-P(astr)	MAX	1892.823452	0.081530	10.463067	0.180800	9.215621	0.001759
Aurora B	93	109	FDIGRPLGKGKFGNVYL		1881.038100	loop-P	0.000000	1882.368380	0.160964	0.000000	0.000000	9.149973	0.004362
Aurora B	93	109	FDIGRPLGKGKFGNVYL		1881.038100	loop-P	3.000000	1887.476755	0.185218	5.108374	0.245388	9.187853	0.039277
Aurora B	93	109	FDIGRPLGKGKFGNVYL		1881.038100	loop-P	10.000000	1887.924100	0.180001	5.555720	0.241474	9.181163	0.044718
Aurora B	93	109	FDIGRPLGKGKFGNVYL		1881.038100	loop-P	30.000002	1888.544907	0.306801	6.176527	0.346463	9.178355	0.036541
Aurora B	93	109	FDIGRPLGKGKFGNVYL		1881.038100	loop-P	90.000008	1889.186170	0.256783	6.817790	0.303063	9.181395	0.040514
Aurora B	93	109	FDIGRPLGKGKFGNVYL		1881.038100	loop-P	300.000000	1889.557582	0.270330	7.189201	0.314623	9.169755	0.033784
Aurora B	93	109	FDIGRPLGKGKFGNVYL		1881.038100	loop-P	MAX	1892.823452	0.081530	10.455072	0.180435	9.215621	0.001759
Aurora B	93	109	FDIGRPLGKGKFGNVYL		1881.038100	IN-P	0.000000	1882.530838	0.402437	0.000000	0.000000	9.149627	0.007754
Aurora B	93	109	FDIGRPLGKGKFGNVYL		1881.038100	IN-P	3.000000	1887.466237	0.211876	4.935400	0.454805	9.171068	0.037526
Aurora B	93	109	FDIGRPLGKGKFGNVYL		1881.038100	IN-P	10.000000	1887.856643	0.222939	5.325805	0.460063	9.176827	0.041655
Aurora B	93	109	FDIGRPLGKGKFGNVYL		1881.038100	IN-P	30.000002	1888.501469	0.260541	5.970631	0.479414	9.173524	0.036716
Aurora B	93	109	FDIGRPLGKGKFGNVYL		1881.038100	IN-P	90.000008	1889.246824	0.274425	6.715986	0.487098	9.169920	0.037727
Aurora B	93	109	FDIGRPLGKGKFGNVYL		1881.038100	IN-P	300.000000	1889.410426	0.271190	6.879589	0.485283	9.172074	0.035438
Aurora B	93	109	FDIGRPLGKGKFGNVYL		1881.038100	IN-P	MAX	1892.823452	0.081530	10.292615	0.410613	9.215621	0.001759
Aurora B	94	108	DIGRPLGKGKFGNVY		1620.885700	all-P(astr)	0.000000	1621.854657	0.089714	0.000000	0.000000	7.496059	0.002315
Aurora B	94	108	DIGRPLGKGKFGNVY		1620.885700	all-P(astr)	3.000000	1626.617377	0.141478	4.762720	0.167525	7.533782	0.001392
Aurora B	94	108	DIGRPLGKGKFGNVY		1620.885700	all-P(astr)	10.000000	1627.028677	0.216268	5.174020	0.234137	7.524190	0.000950
Aurora B	94	108	DIGRPLGKGKFGNVY		1620.885700	all-P(astr)	30.000002	1627.547017	0.215097	5.692360	0.233057	7.508148	0.034814
Aurora B	94	108	DIGRPLGKGKFGNVY		1620.885700	all-P(astr)	90.000008	1628.177629	0.203931	6.322972	0.222792	7.496910	0.026288
Aurora B	94	108	DIGRPLGKGKFGNVY		1620.885700	all-P(astr)	300.000000	1628.678784	0.249204	6.824127	0.264861	7.497139	0.030424
Aurora B	94	108	DIGRPLGKGKFGNVY		1620.885700	all-P(astr)	MAX	1630.745779	0.057938	8.891122	0.106796	7.510495	0.000854
Aurora B	94	108	DIGRPLGKGKFGNVY		1620.885700	no-P(astr)	0.000000	1621.857349	0.103041	0.000000	0.000000	7.488132	0.002257
Aurora B	94	108	DIGRPLGKGKFGNVY		1620.885700	no-P(astr)	3.000000	1626.829802	0.184422	4.972453	0.211256	7.506678	0.017429
Aurora B	94	108	DIGRPLGKGKFGNVY		1620.885700	no-P(astr)	10.000000	1627.369804	0.220177	5.512455	0.243095	7.502213	0.028222
Aurora B	94	108	DIGRPLGKGKFGNVY		1620.885700	no-P(astr)	30.000002	1628.053233	0.154292	6.195884	0.185536	7.496733	0.030887
Aurora B	94	108	DIGRPLGKGKFGNVY		1620.885700	no-P(astr)	90.000008	1628.568194	0.215694	6.710845	0.239042	7.498102	0.029378
Aurora B	94	108	DIGRPLGKGKFGNVY		1620.885700	no-P(astr)	300.000000	1628.837091	0.279267	6.979743	0.297670	7.502173	0.026436
Aurora B	94	108	DIGRPLGKGKFGNVY		1620.885700	no-P(astr)	MAX	1630.745779	0.057938	8.888430	0.118213	7.510495	0.000854
Aurora B	94	108	DIGRPLGKGKFGNVY		1620.885700	loop-P	0.000000	1621.679035	0.057195	0.000000	0.000000	7.478802	0.003910
Aurora B	94	108	DIGRPLGKGKFGNVY		1620.885700	loop-P	3.000000	1626.578331	0.109346	4.899296	0.123401	7.503985	0.027947
Aurora B	94	108	DIGRPLGKGKFGNVY		1620.885700	loop-P	10.000000	1626.515866	0.000000	4.836832	0.057195	7.460337	0.000000
Aurora B	94	108	DIGRPLGKGKFGNVY		1620.885700	loop-P	30.000002	1627.580180	0.125744	5.901146	0.138141	7.497276	0.024137
Aurora B	94	108	DIGRPLGKGKFGNVY		1620.885700	loop-P	90.000008	1628.142565	0.213308	6.463531	0.220843	7.500970	0.028047
Aurora B	94	108	DIGRPLGKGKFGNVY		1620.885700	loop-P	300.000000	1628.528845	0.276680	6.849811	0.282529	7.496404	0.026055
Aurora B	94	108	DIGRPLGKGKFGNVY		1620.885700	loop-P	MAX	1630.741582	0.051177	9.062548	0.076749	7.508881	4.151990E-5
Aurora B	94	108	DIGRPLGKGKFGNVY		1620.885700	IN-P	0.000000	1621.962022	0.129751	0.000000	0.000000	7.482758	0.004747
Aurora B	94	108	DIGRPLGKGKFGNVY		1620.885700	IN-P	3.000000	1626.897424	0.079245	4.935402	0.152036	7.513100	0.002949
Aurora B	94	108	DIGRPLGKGKFGNVY		1620.885700	IN-P	10.000000	1627.126943	0.240594	5.164921	0.273351	7.495510	0.029844
Aurora B	94	108	DIGRPLGKGKFGNVY		1620.885700	IN-P	30.000002	1627.624002	0.000000	5.661979	0.129751	7.511924	0.000000
Aurora B	94	108	DIGRPLGKGKFGNVY		1620.885700	IN-P	90.000008	1628.508249	0.050864	6.546227	0.139364	7.506569	0.005296
Aurora B	94	108	DIGRPLGKGKFGNVY		1620.885700	IN-P	300.000000	1628.644217	0.204822	6.682195	0.242461	7.489085	0.023823
Aurora B	94	108	DIGRPLGKGKFGNVY		1620.885700	IN-P	MAX	1630.745779	0.057938	8.783756	0.142099	7.510495	0.000854
Aurora B	94	109	DIGRPLGKGKFGNVYL		1733.969700	all-P(astr)	0.000000	1735.105434	0.109634	0.000000	0.000000	8.542821	0.005268
Aurora B	94	109	DIGRPLGKGKFGNVYL		1733.969700	all-P(astr)	3.000000	1739.656832	0.069656	4.551399	0.129891	8.544767	0.045116
Aurora B	94	109	DIGRPLGKGKFGNVYL		1733.969700	all-P(astr)	10.000000	1740.109059	0.050713	5.003625	0.120795	8.545277	0.037616
Aurora B	94	109	DIGRPLGKGKFGNVYL		1733.969700	all-P(astr)	30.000002	1740.691556	0.090151	5.586122	0.141940	8.554688	0.038896
Aurora B	94	109	DIGRPLGKGKFGNVYL		1733.969700	all-P(astr)	90.000008	1741.333173	0.108533	6.227740	0.154270	8.548550	0.031483
Aurora B	94	109	DIGRPLGKGKFGNVYL		1733.969700	all-P(astr)	300.000000	1741.904837	0.098638	6.799403	0.147476	8.543290	0.037233
Aurora B	94	109	DIGRPLGKGKFGNVYL		1733.969700	all-P(astr)	MAX	1744.564021	0.127117	9.458587	0.167864	8.576994	0.001473
Aurora B	94	109	DIGRPLGKGKFGNVYL		1733.969700	no-P(astr)	0.000000	1735.094554	0.108296	0.000000	0.000000	8.536465	0.003034
Aurora B	94	109	DIGRPLGKGKFGNVYL		1733.969700	no-P(astr)	3.000000	1739.907989	0.093189	4.813435	0.142871	8.561760	0.018141
Aurora B	94	109	DIGRPLGKGKFGNVYL		1733.969700	no-P(astr)	10.000000	1740.432993	0.085778	5.338439	0.138152	8.550273	0.036293
Aurora B	94	109	DIGRPLGKGKFGNVYL		1733.969700	no-P(astr)	30.000002	1741.211833	0.073266	6.117280	0.130751	8.547340	0.039208
Aurora B	94	109	DIGRPLGKGKFGNVYL		1733.969700	no-P(astr)	90.000008	1741.706015	0.098351	6.611461	0.146291	8.547831	0.037583
Aurora B	94	109	DIGRPLGKGKFGNVYL		1733.969700	no-P(astr)	300.000000	1741.956405	0.230413	6.861851	0.254594	8.550977	0.034153
Aurora B	94	109	DIGRPLGKGKFGNVYL		1733.969700	no-P(astr)	MAX	1744.564021	0.127117	9.469467	0.166993	8.576994	0.001473
Aurora B	94	109	DIGRPLGKGKFGNVYL		1733.969700	loop-P	0.000000	1735.139416	0.142397	0.000000	0.000000	8.526294	0.003049
Aurora B	94	109	DIGRPLGKGKFGNVYL		1733.969700	loop-P	3.000000	1739.817911	0.076609	4.678495	0.161697	8.556443	0.038063
Aurora B	94	109	DIGRPLGKGKFGNVYL		1733.969700	loop-P	10.000000	1740.255462	0.116776	5.116046	0.184156	8.549525	0.044000
Aurora B	94	109	DIGRPLGKGKFGNVYL		1733.969700	loop-P	30.000002	1740.938327	0.166031	5.798911	0.218731	8.545172	0.034451
Aurora B	94	109	DIGRPLGKGKFGNVYL		1733.969700	loop-P	90.000008	1741.565947	0.144622	6.426531	0.202959	8.550737	0.037627
Aurora B	94	109	DIGRPLGKGKFGNVYL		1733.969700	loop-P	300.000000	1741.877986	0.135582	6.738570	0.196620	8.544144	0.033994
Aurora B	94	109	DIGRPLGKGKFGNVYL		1733.969700	loop-P	MAX	1744.564021	0.127117	9.424605	0.190881	8.576994	0.001473
Aurora B	94	109	DIGRPLGKGKFGNVYL		1733.969700	IN-P	0.000000	1735.218848	0.159004	0.000000	0.000000	8.526449	0.005064
Aurora B	94	109	DIGRPLGKGKFGNVYL		1733.969700	IN-P	3.000000	1739.801300	0.105319	4.582452	0.190720	8.543589	0.036466
Aurora B	94	109	DIGRPLGKGKFGNVYL		1733.969700	IN-P	10.000000	1740.256182	0.127114	5.037334	0.203568	8.546760	0.039945
Aurora B	94	109	DIGRPLGKGKFGNVYL		1733.969700	IN-P	30.000002	1740.867734	0.093991	5.648886	0.184707	8.546359	0.032231
Aurora B	94	109	DIGRPLGKGKFGNVYL		1733.969700	IN-P	90.000008	1741.666860	0.110987	6.448012	0.193908	8.541083	0.035399
Aurora B	94	109	DIGRPLGKGKFGNVYL		1733.969700	IN-P	300.000000	1741.818026	0.071460	6.599178	0.174323	8.546524	0.033678
Aurora B	94	109	DIGRPLGKGKFGNVYL		1733.969700	IN-P	MAX	1744.564021	0.127117	9.345173	0.203570	8.576994	0.001473
Aurora B	109	117	LAREKQNKF		1133.642600	all-P(astr)	0.000000	1134.330975	0.011253	0.000000	0.000000	5.621726	0.001216
Aurora B	109	117	LAREKQNKF		1133.642600	all-P(astr)	3.000000	1136.175086	0.043441	1.844111	0.044874	5.599402	0.003022
Aurora B	109	117	LAREKQNKF		1133.642600	all-P(astr)	10.000000	1136.408874	0.008167	2.077899	0.013904	5.595730	0.004429
Aurora B	109	117	LAREKQNKF		1133.642600	all-P(astr)	30.000002	1136.557582	0.019733	2.226607	0.022716	5.600467	0.001497
Aurora B	109	117	LAREKQNKF		1133.642600	all-P(astr)	90.000008	1136.846273	0.049721	2.515298	0.050978	5.592700	0.009782
Aurora B	109	117	LAREKQNKF		1133.642600	all-P(astr)	300.000000	1137.298871	0.033913	2.967896	0.035731	5.595176	0.006127
Aurora B	109	117	LAREKQNKF		1133.642600	all-P(astr)	MAX	1138.993963	0.027787	4.662988	0.029979	5.555191	0.005639
Aurora B	109	117	LAREKQNKF		1133.642600	no-P(astr)	0.000000	1134.299371	0.025505	0.000000	0.000000	5.608557	0.001682
Aurora B	109	117	LAREKQNKF		1133.642600	no-P(astr)	3.000000	1136.361556	0.067228	2.062185	0.071903	5.599441	0.006636
Aurora B	109	117	LAREKQNKF		1133.642600	no-P(astr)	10.000000	1136.450082	0.061354	2.150711	0.066445	5.600683	0.005451
Aurora B	109	117	LAREKQNKF		1133.642600	no-P(astr)	30.000002	1136.783065	0.008540	2.483695	0.026897	5.598348	0.001157
Aurora B	109	117	LAREKQNKF		1133.642600	no-P(astr)	90.000008	1137.310590	0.010549	3.011219	0.027601	5.592402	0.000369
Aurora B	109	117	LAREKQNKF		1133.642600	no-P(astr)	300.000000	1137.752253	0.087096	3.452882	0.090754	5.600650	0.008203
Aurora B	109	117	LAREKQNKF		1133.642600	no-P(astr)	MAX	1138.993963	0.027787	4.694592	0.037718	5.555191	0.005639
Aurora B	109	117	LAREKQNKF		1133.642600	loop-P	0.000000	1134.371631	0.016464	0.000000	0.000000	5.621180	0.001317
Aurora B	109	117	LAREKQNKF		1133.642600	loop-P	3.000000	1136.280132	0.000692	1.908501	0.016479	5.599452	0.005362
Aurora B	109	117	LAREKQNKF		1133.642600	loop-P	10.000000	1136.418109	0.013230	2.046478	0.021122	5.597352	0.001854
Aurora B	109	117	LAREKQNKF		1133.642600	loop-P	30.000002	1136.525992	0.029623	2.154361	0.033891	5.596477	0.005000
Aurora B	109	117	LAREKQNKF		1133.642600	loop-P	90.000008	1136.956120	0.000927	2.584489	0.016490	5.599040	0.005794
Aurora B	109	117	LAREKQNKF		1133.642600	loop-P	300.000000	1137.594577	0.034822	3.222946	0.038519	5.594092	0.007503
Aurora B	109	117	LAREKQNKF		1133.642600	loop-P	MAX	1138.993963	0.027787	4.622332	0.032299	5.555191	0.005639
Aurora B	109	117	LAREKQNKF		1133.642600	IN-P	0.000000	1134.470441	0.029002	0.000000	0.000000	5.624821	0.004334
Aurora B	109	117	LAREKQNKF		1133.642600	IN-P	3.000000	1136.251829	0.065456	1.781388	0.071593	5.591710	0.006133
Aurora B	109	117	LAREKQNKF		1133.642600	IN-P	10.000000	1136.414107	0.022238	1.943666	0.036546	5.593595	0.000576
Aurora B	109	117	LAREKQNKF		1133.642600	IN-P	30.000002	1136.550697	0.018209	2.080256	0.034244	5.589748	0.008770
Aurora B	109	117	LAREKQNKF		1133.642600	IN-P	90.000008	1136.933101	0.142097	2.462660	0.145026	5.591911	0.007616
Aurora B	109	117	LAREKQNKF		1133.642600	IN-P	300.000000	1137.414246	0.063244	2.943805	0.069577	5.597981	0.007123
Aurora B	109	117	LAREKQNKF		1133.642600	IN-P	MAX	1138.993963	0.027787	4.523522	0.040165	5.555191	0.005639
Aurora B	109	120	LAREKQNKFIMA		1448.804200	all-P(astr)	0.000000	1449.750161	0.060080	0.000000	0.000000	7.272833	0.002866
Aurora B	109	120	LAREKQNKFIMA		1448.804200	all-P(astr)	3.000000	1451.611456	0.097654	1.861295	0.114656	7.255313	0.023599
Aurora B	109	120	LAREKQNKFIMA		1448.804200	all-P(astr)	10.000000	1451.815280	0.109301	2.065119	0.124725	7.254737	0.017816
Aurora B	109	120	LAREKQNKFIMA		1448.804200	all-P(astr)	30.000002	1452.211318	0.113999	2.461157	0.128862	7.263970	0.021537
Aurora B	109	120	LAREKQNKFIMA		1448.804200	all-P(astr)	90.000008	1452.692949	0.153427	2.942788	0.164771	7.253060	0.013364
Aurora B	109	120	LAREKQNKFIMA		1448.804200	all-P(astr)	300.000000	1453.442702	0.157820	3.692541	0.168869	7.252111	0.019926
Aurora B	109	120	LAREKQNKFIMA		1448.804200	all-P(astr)	MAX	1457.324900	0.255695	7.574739	0.262658	7.242131	0.001203
Aurora B	109	120	LAREKQNKFIMA		1448.804200	no-P(astr)	0.000000	1449.694530	0.039582	0.000000	0.000000	7.266109	0.002873
Aurora B	109	120	LAREKQNKFIMA		1448.804200	no-P(astr)	3.000000	1451.802369	0.114433	2.107839	0.121086	7.262062	0.008636
Aurora B	109	120	LAREKQNKFIMA		1448.804200	no-P(astr)	10.000000	1452.076740	0.127400	2.382209	0.133407	7.262251	0.016155
Aurora B	109	120	LAREKQNKFIMA		1448.804200	no-P(astr)	30.000002	1452.705511	0.164287	3.010980	0.168988	7.255797	0.019420
Aurora B	109	120	LAREKQNKFIMA		1448.804200	no-P(astr)	90.000008	1453.508847	0.218729	3.814317	0.222281	7.254472	0.016992
Aurora B	109	120	LAREKQNKFIMA		1448.804200	no-P(astr)	300.000000	1453.887590	0.244845	4.193060	0.248024	7.258349	0.013912
Aurora B	109	120	LAREKQNKFIMA		1448.804200	no-P(astr)	MAX	1457.324900	0.255695	7.630370	0.258740	7.242131	0.001203
Aurora B	109	120	LAREKQNKFIMA		1448.804200	loop-P	0.000000	1449.754805	0.064369	0.000000	0.000000	7.256287	0.004097
Aurora B	109	120	LAREKQNKFIMA		1448.804200	loop-P	3.000000	1451.678749	0.116130	1.923944	0.132776	7.259671	0.016226
Aurora B	109	120	LAREKQNKFIMA		1448.804200	loop-P	10.000000	1451.818986	0.141890	2.064181	0.155809	7.255545	0.021223
Aurora B	109	120	LAREKQNKFIMA		1448.804200	loop-P	30.000002	1452.063137	0.098498	2.308332	0.117666	7.253028	0.017475
Aurora B	109	120	LAREKQNKFIMA		1448.804200	loop-P	90.000008	1452.695535	0.144577	2.940730	0.158259	7.258428	0.019429
Aurora B	109	120	LAREKQNKFIMA		1448.804200	loop-P	300.000000	1453.728729	0.126382	3.973924	0.141830	7.252260	0.014402
Aurora B	109	120	LAREKQNKFIMA		1448.804200	loop-P	MAX	1457.324900	0.255695	7.570095	0.263672	7.242131	0.001203
Aurora B	109	120	LAREKQNKFIMA		1448.804200	IN-P	0.000000	1449.787997	0.064412	0.000000	0.000000	7.259743	0.003868
Aurora B	109	120	LAREKQNKFIMA		1448.804200	IN-P	3.000000	1451.657020	0.079890	1.869024	0.102622	7.248510	0.014721
Aurora B	109	120	LAREKQNKFIMA		1448.804200	IN-P	10.000000	1451.916547	0.088489	2.128550	0.109449	7.252559	0.019571
Aurora B	109	120	LAREKQNKFIMA		1448.804200	IN-P	30.000002	1452.167811	0.115156	2.379814	0.131946	7.240651	0.009962
Aurora B	109	120	LAREKQNKFIMA		1448.804200	IN-P	90.000008	1452.911024	0.182158	3.123027	0.193210	7.247653	0.013743
Aurora B	109	120	LAREKQNKFIMA		1448.804200	IN-P	300.000000	1453.508045	0.113385	3.720049	0.130403	7.251582	0.016062
Aurora B	109	120	LAREKQNKFIMA		1448.804200	IN-P	MAX	1457.324900	0.255695	7.536903	0.263683	7.242131	0.001203
Aurora B	109	121	LAREKQNKFIMAL		1561.888300	all-P(astr)	0.000000	1562.966861	0.116060	0.000000	0.000000	8.891891	0.002136
Aurora B	109	121	LAREKQNKFIMAL		1561.888300	all-P(astr)	3.000000	1564.713969	0.123810	1.747107	0.169702	8.883601	0.037092
Aurora B	109	121	LAREKQNKFIMAL		1561.888300	all-P(astr)	10.000000	1565.000753	0.133684	2.033891	0.177035	8.884155	0.035324
Aurora B	109	121	LAREKQNKFIMAL		1561.888300	all-P(astr)	30.000002	1565.336099	0.187840	2.369238	0.220803	8.896078	0.034664
Aurora B	109	121	LAREKQNKFIMAL		1561.888300	all-P(astr)	90.000008	1565.787613	0.164834	2.820752	0.201594	8.884103	0.028056
Aurora B	109	121	LAREKQNKFIMAL		1561.888300	all-P(astr)	300.000000	1566.564781	0.171254	3.597920	0.206877	8.881238	0.031659
Aurora B	109	121	LAREKQNKFIMAL		1561.888300	all-P(astr)	MAX	1571.665081	0.042745	8.698220	0.123681	8.896742	0.002801
Aurora B	109	121	LAREKQNKFIMAL		1561.888300	no-P(astr)	0.000000	1562.964033	0.121824	0.000000	0.000000	8.889784	0.004885
Aurora B	109	121	LAREKQNKFIMAL		1561.888300	no-P(astr)	3.000000	1564.968698	0.116253	2.004665	0.168392	8.902413	0.012858
Aurora B	109	121	LAREKQNKFIMAL		1561.888300	no-P(astr)	10.000000	1565.200233	0.170991	2.236201	0.209950	8.889168	0.033686
Aurora B	109	121	LAREKQNKFIMAL		1561.888300	no-P(astr)	30.000002	1565.818080	0.166729	2.854048	0.206494	8.886549	0.033588
Aurora B	109	121	LAREKQNKFIMAL		1561.888300	no-P(astr)	90.000008	1566.614356	0.174560	3.650323	0.212866	8.884846	0.032270
Aurora B	109	121	LAREKQNKFIMAL		1561.888300	no-P(astr)	300.000000	1567.040103	0.217800	4.076070	0.249555	8.884155	0.027654
Aurora B	109	121	LAREKQNKFIMAL		1561.888300	no-P(astr)	MAX	1571.665081	0.042745	8.701048	0.129105	8.896742	0.002801
Aurora B	109	121	LAREKQNKFIMAL		1561.888300	loop-P	0.000000	1562.938850	0.103482	0.000000	0.000000	8.871913	0.005448
Aurora B	109	121	LAREKQNKFIMAL		1561.888300	loop-P	3.000000	1564.801453	0.119994	1.862603	0.158452	8.889007	0.032316
Aurora B	109	121	LAREKQNKFIMAL		1561.888300	loop-P	10.000000	1564.961066	0.139055	2.022216	0.173335	8.887637	0.036539
Aurora B	109	121	LAREKQNKFIMAL		1561.888300	loop-P	30.000002	1565.173085	0.127683	2.234235	0.164351	8.884440	0.027538
Aurora B	109	121	LAREKQNKFIMAL		1561.888300	loop-P	90.000008	1565.777369	0.133465	2.838519	0.168883	8.887148	0.030025
Aurora B	109	121	LAREKQNKFIMAL		1561.888300	loop-P	300.000000	1566.838401	0.098253	3.899551	0.142696	8.883759	0.029021
Aurora B	109	121	LAREKQNKFIMAL		1561.888300	loop-P	MAX	1571.665081	0.042745	8.726231	0.111963	8.896742	0.002801
Aurora B	109	121	LAREKQNKFIMAL		1561.888300	IN-P	0.000000	1563.046773	0.153078	0.000000	0.000000	8.875416	0.003531
Aurora B	109	121	LAREKQNKFIMAL		1561.888300	IN-P	3.000000	1564.818291	0.148031	1.771517	0.212947	8.878573	0.029550
Aurora B	109	121	LAREKQNKFIMAL		1561.888300	IN-P	10.000000	1565.077600	0.131423	2.030826	0.201755	8.886086	0.032080
Aurora B	109	121	LAREKQNKFIMAL		1561.888300	IN-P	30.000002	1565.366577	0.159192	2.319804	0.220851	8.883871	0.028518
Aurora B	109	121	LAREKQNKFIMAL		1561.888300	IN-P	90.000008	1566.027711	0.207256	2.980938	0.257659	8.877769	0.027285
Aurora B	109	121	LAREKQNKFIMAL		1561.888300	IN-P	300.000000	1566.616680	0.153768	3.569906	0.216974	8.883003	0.028609
Aurora B	109	121	LAREKQNKFIMAL		1561.888300	IN-P	MAX	1571.665081	0.042745	8.618308	0.158934	8.896742	0.002801
Aurora B	110	117	AREKQNKF		1020.558500	all-P(astr)	0.000000	1021.181284	0.018914	0.000000	0.000000	5.263400	0.004286
Aurora B	110	117	AREKQNKF		1020.558500	all-P(astr)	3.000000	1022.998755	0.001629	1.817471	0.018984	5.221448	0.004494
Aurora B	110	117	AREKQNKF		1020.558500	all-P(astr)	10.000000	1023.283003	0.013869	2.101720	0.023454	5.211570	0.009078
Aurora B	110	117	AREKQNKF		1020.558500	all-P(astr)	30.000002	1023.431415	0.003153	2.250131	0.019175	5.213979	0.005590
Aurora B	110	117	AREKQNKF		1020.558500	all-P(astr)	90.000008	1023.667337	0.002313	2.486054	0.019055	5.206795	0.016053
Aurora B	110	117	AREKQNKF		1020.558500	all-P(astr)	300.000000	1024.148853	0.005864	2.967569	0.019802	5.207796	0.012419
Aurora B	110	117	AREKQNKF		1020.558500	all-P(astr)	MAX	1025.132318	0.028766	3.951034	0.034427	5.141125	0.006186
Aurora B	110	117	AREKQNKF		1020.558500	no-P(astr)	0.000000	1021.185047	0.006125	0.000000	0.000000	5.246086	0.007228
Aurora B	110	117	AREKQNKF		1020.558500	no-P(astr)	3.000000	1023.177901	0.038267	1.992854	0.038754	5.211179	0.011659
Aurora B	110	117	AREKQNKF		1020.558500	no-P(astr)	10.000000	1023.277441	0.041303	2.092394	0.041754	5.217635	0.012985
Aurora B	110	117	AREKQNKF		1020.558500	no-P(astr)	30.000002	1023.634011	0.032999	2.448964	0.033563	5.218430	0.007411
Aurora B	110	117	AREKQNKF		1020.558500	no-P(astr)	90.000008	1024.073722	0.009018	2.888675	0.010902	5.208548	0.008127
Aurora B	110	117	AREKQNKF		1020.558500	no-P(astr)	300.000000	1024.438150	0.054024	3.253103	0.054370	5.212492	0.015549
Aurora B	110	117	AREKQNKF		1020.558500	no-P(astr)	MAX	1025.132318	0.028766	3.947271	0.029411	5.141125	0.006186
Aurora B	110	117	AREKQNKF		1020.558500	loop-P	0.000000	1021.142102	0.021140	0.000000	0.000000	5.242948	0.003639
Aurora B	110	117	AREKQNKF		1020.558500	loop-P	3.000000	1023.065696	0.025246	1.923594	0.032928	5.213670	0.011999
Aurora B	110	117	AREKQNKF		1020.558500	loop-P	10.000000	1023.207693	0.089037	2.065591	0.091513	5.212643	0.002195
Aurora B	110	117	AREKQNKF		1020.558500	loop-P	30.000002	1023.326411	0.014033	2.184309	0.025374	5.209879	0.011532
Aurora B	110	117	AREKQNKF		1020.558500	loop-P	90.000008	1023.681306	0.029419	2.539204	0.036227	5.215047	0.011676
Aurora B	110	117	AREKQNKF		1020.558500	loop-P	300.000000	1024.283323	0.000827	3.141221	0.021157	5.202919	0.017444
Aurora B	110	117	AREKQNKF		1020.558500	loop-P	MAX	1025.135307	0.048869	3.993205	0.053246	5.141206	0.006262
Aurora B	110	117	AREKQNKF		1020.558500	IN-P	0.000000	1021.327577	0.070860	0.000000	0.000000	5.250824	0.004233
Aurora B	110	117	AREKQNKF		1020.558500	IN-P	3.000000	1023.120087	0.073569	1.792510	0.102144	5.205400	0.010610
Aurora B	110	117	AREKQNKF		1020.558500	IN-P	10.000000	1023.288146	0.019117	1.960570	0.073394	5.208309	0.001072
Aurora B	110	117	AREKQNKF		1020.558500	IN-P	30.000002	1023.416274	0.025091	2.088697	0.075171	5.206563	0.016598
Aurora B	110	117	AREKQNKF		1020.558500	IN-P	90.000008	1023.794885	0.060705	2.467309	0.093307	5.208392	0.008675
Aurora B	110	117	AREKQNKF		1020.558500	IN-P	300.000000	1024.213717	0.038894	2.886140	0.080832	5.210825	0.019931
Aurora B	110	117	AREKQNKF		1020.558500	IN-P	MAX	1025.135307	0.048869	3.807730	0.086078	5.141206	0.006262
Aurora B	110	119	AREKQNKFIM		1264.683100	all-P(astr)	0.000000	1265.418884	0.033908	0.000000	0.000000	7.422427	0.004410
Aurora B	110	119	AREKQNKFIM		1264.683100	all-P(astr)	3.000000	1267.375117	0.143873	1.956232	0.147814	7.398127	0.024619
Aurora B	110	119	AREKQNKFIM		1264.683100	all-P(astr)	10.000000	1267.693229	0.148220	2.274345	0.152049	7.396734	0.016221
Aurora B	110	119	AREKQNKFIM		1264.683100	all-P(astr)	30.000002	1267.999703	0.202084	2.580818	0.204909	7.403971	0.017832
Aurora B	110	119	AREKQNKFIM		1264.683100	all-P(astr)	90.000008	1268.427065	0.203476	3.008181	0.206282	7.395344	0.009926
Aurora B	110	119	AREKQNKFIM		1264.683100	all-P(astr)	300.000000	1269.245426	0.207327	3.826541	0.210081	7.394827	0.012066
Aurora B	110	119	AREKQNKFIM		1264.683100	all-P(astr)	MAX	1271.438091	0.232429	6.019207	0.234889	7.377768	0.003587
Aurora B	110	119	AREKQNKFIM		1264.683100	no-P(astr)	0.000000	1265.429774	0.059012	0.000000	0.000000	7.411645	0.004905
Aurora B	110	119	AREKQNKFIM		1264.683100	no-P(astr)	3.000000	1267.645156	0.142573	2.215382	0.154303	7.405894	0.005986
Aurora B	110	119	AREKQNKFIM		1264.683100	no-P(astr)	10.000000	1267.890064	0.132394	2.460290	0.144951	7.403308	0.014198
Aurora B	110	119	AREKQNKFIM		1264.683100	no-P(astr)	30.000002	1268.483048	0.201830	3.053274	0.210280	7.397845	0.018626
Aurora B	110	119	AREKQNKFIM		1264.683100	no-P(astr)	90.000008	1269.345977	0.189919	3.916203	0.198876	7.396687	0.017486
Aurora B	110	119	AREKQNKFIM		1264.683100	no-P(astr)	300.000000	1269.774228	0.222681	4.344454	0.230368	7.399064	0.009973
Aurora B	110	119	AREKQNKFIM		1264.683100	no-P(astr)	MAX	1271.438091	0.232429	6.008316	0.239804	7.377768	0.003587
Aurora B	110	119	AREKQNKFIM		1264.683100	loop-P	0.000000	1265.440223	0.057016	0.000000	0.000000	7.399651	0.002146
Aurora B	110	119	AREKQNKFIM		1264.683100	loop-P	3.000000	1267.508953	0.088303	2.068731	0.105111	7.402842	0.014117
Aurora B	110	119	AREKQNKFIM		1264.683100	loop-P	10.000000	1267.635774	0.128339	2.195552	0.140434	7.398355	0.020349
Aurora B	110	119	AREKQNKFIM		1264.683100	loop-P	30.000002	1267.856350	0.150025	2.416127	0.160494	7.396141	0.011816
Aurora B	110	119	AREKQNKFIM		1264.683100	loop-P	90.000008	1268.471716	0.166731	3.031493	0.176210	7.400697	0.014743
Aurora B	110	119	AREKQNKFIM		1264.683100	loop-P	300.000000	1269.558320	0.205374	4.118097	0.213141	7.394613	0.008108
Aurora B	110	119	AREKQNKFIM		1264.683100	loop-P	MAX	1271.438091	0.232429	5.997868	0.239320	7.377768	0.003587
Aurora B	110	119	AREKQNKFIM		1264.683100	IN-P	0.000000	1265.542905	0.059556	0.000000	0.000000	7.404391	0.005472
Aurora B	110	119	AREKQNKFIM		1264.683100	IN-P	3.000000	1267.456721	0.172585	1.913817	0.182572	7.389908	0.013267
Aurora B	110	119	AREKQNKFIM		1264.683100	IN-P	10.000000	1267.739760	0.132341	2.196856	0.145124	7.393857	0.017197
Aurora B	110	119	AREKQNKFIM		1264.683100	IN-P	30.000002	1268.014618	0.131233	2.471714	0.144114	7.390954	0.011735
Aurora B	110	119	AREKQNKFIM		1264.683100	IN-P	90.000008	1268.695146	0.241801	3.152241	0.249027	7.388133	0.012258
Aurora B	110	119	AREKQNKFIM		1264.683100	IN-P	300.000000	1269.323027	0.179254	3.780122	0.188889	7.394832	0.010732
Aurora B	110	119	AREKQNKFIM		1264.683100	IN-P	MAX	1271.438091	0.232429	5.895186	0.239938	7.377768	0.003587
Aurora B	110	120	AREKQNKFIMA		1335.720200	all-P(astr)	0.000000	1336.609348	0.092344	0.000000	0.000000	7.126727	0.002444
Aurora B	110	120	AREKQNKFIMA		1335.720200	all-P(astr)	3.000000	1338.416283	0.130399	1.806934	0.159785	7.106390	0.019962
Aurora B	110	120	AREKQNKFIMA		1335.720200	all-P(astr)	10.000000	1338.733358	0.194356	2.124009	0.215178	7.105738	0.015451
Aurora B	110	120	AREKQNKFIMA		1335.720200	all-P(astr)	30.000002	1339.061968	0.195022	2.452620	0.215780	7.112638	0.021412
Aurora B	110	120	AREKQNKFIMA		1335.720200	all-P(astr)	90.000008	1339.508917	0.204081	2.899569	0.224001	7.101791	0.010289
Aurora B	110	120	AREKQNKFIMA		1335.720200	all-P(astr)	300.000000	1340.220830	0.204072	3.611482	0.223993	7.102274	0.014563
Aurora B	110	120	AREKQNKFIMA		1335.720200	all-P(astr)	MAX	1343.322788	0.364458	6.713440	0.375975	7.089854	0.002076
Aurora B	110	120	AREKQNKFIMA		1335.720200	no-P(astr)	0.000000	1336.615899	0.079476	0.000000	0.000000	7.119000	0.002817
Aurora B	110	120	AREKQNKFIMA		1335.720200	no-P(astr)	3.000000	1338.659366	0.176849	2.043467	0.193887	7.108509	0.006967
Aurora B	110	120	AREKQNKFIMA		1335.720200	no-P(astr)	10.000000	1338.904423	0.189678	2.288524	0.205656	7.110924	0.017335
Aurora B	110	120	AREKQNKFIMA		1335.720200	no-P(astr)	30.000002	1339.504643	0.180405	2.888744	0.197135	7.108536	0.015162
Aurora B	110	120	AREKQNKFIMA		1335.720200	no-P(astr)	90.000008	1340.311621	0.176178	3.695722	0.193274	7.105736	0.016626
Aurora B	110	120	AREKQNKFIMA		1335.720200	no-P(astr)	300.000000	1340.663870	0.294181	4.047971	0.304727	7.105186	0.013544
Aurora B	110	120	AREKQNKFIMA		1335.720200	no-P(astr)	MAX	1343.322788	0.364458	6.706889	0.373023	7.089854	0.002076
Aurora B	110	120	AREKQNKFIMA		1335.720200	loop-P	0.000000	1336.611933	0.084564	0.000000	0.000000	7.105428	0.002048
Aurora B	110	120	AREKQNKFIMA		1335.720200	loop-P	3.000000	1338.500410	0.128596	1.888477	0.153909	7.109690	0.012377
Aurora B	110	120	AREKQNKFIMA		1335.720200	loop-P	10.000000	1338.681010	0.169387	2.069077	0.189322	7.101799	0.020122
Aurora B	110	120	AREKQNKFIMA		1335.720200	loop-P	30.000002	1338.871224	0.153389	2.259292	0.175155	7.103158	0.015494
Aurora B	110	120	AREKQNKFIMA		1335.720200	loop-P	90.000008	1339.527804	0.180264	2.915871	0.199113	7.106957	0.015113
Aurora B	110	120	AREKQNKFIMA		1335.720200	loop-P	300.000000	1340.537018	0.179435	3.925085	0.198363	7.099790	0.012399
Aurora B	110	120	AREKQNKFIMA		1335.720200	loop-P	MAX	1343.322788	0.364458	6.710856	0.374140	7.089854	0.002076
Aurora B	110	120	AREKQNKFIMA		1335.720200	IN-P	0.000000	1336.737790	0.122226	0.000000	0.000000	7.109196	0.004473
Aurora B	110	120	AREKQNKFIMA		1335.720200	IN-P	3.000000	1338.534490	0.155270	1.796700	0.197606	7.098493	0.012236
Aurora B	110	120	AREKQNKFIMA		1335.720200	IN-P	10.000000	1338.795210	0.158545	2.057420	0.200189	7.103770	0.015036
Aurora B	110	120	AREKQNKFIMA		1335.720200	IN-P	30.000002	1339.112535	0.167505	2.374745	0.207357	7.099948	0.011331
Aurora B	110	120	AREKQNKFIMA		1335.720200	IN-P	90.000008	1339.779014	0.232937	3.041224	0.263057	7.096771	0.013379
Aurora B	110	120	AREKQNKFIMA		1335.720200	IN-P	300.000000	1340.323789	0.135513	3.585999	0.182491	7.101244	0.010663
Aurora B	110	120	AREKQNKFIMA		1335.720200	IN-P	MAX	1343.322788	0.364458	6.584998	0.384407	7.089854	0.002076
Aurora B	110	121	AREKQNKFIMAL		1448.804200	all-P(astr)	0.000000	1449.839630	0.111559	0.000000	0.000000	8.796811	0.005268
Aurora B	110	121	AREKQNKFIMAL		1448.804200	all-P(astr)	3.000000	1451.507946	0.148445	1.668315	0.185691	8.793869	0.038093
Aurora B	110	121	AREKQNKFIMAL		1448.804200	all-P(astr)	10.000000	1451.768372	0.153977	1.928741	0.190143	8.791251	0.030770
Aurora B	110	121	AREKQNKFIMAL		1448.804200	all-P(astr)	30.000002	1452.079384	0.182374	2.239753	0.213789	8.803086	0.033385
Aurora B	110	121	AREKQNKFIMAL		1448.804200	all-P(astr)	90.000008	1452.542230	0.219488	2.702600	0.246212	8.791903	0.025025
Aurora B	110	121	AREKQNKFIMAL		1448.804200	all-P(astr)	300.000000	1453.321825	0.238871	3.482194	0.263637	8.789209	0.030254
Aurora B	110	121	AREKQNKFIMAL		1448.804200	all-P(astr)	MAX	1457.367565	0.396603	7.527934	0.411994	8.801922	0.001561
Aurora B	110	121	AREKQNKFIMAL		1448.804200	no-P(astr)	0.000000	1449.821304	0.104493	0.000000	0.000000	8.793222	0.002690
Aurora B	110	121	AREKQNKFIMAL		1448.804200	no-P(astr)	3.000000	1451.692637	0.139023	1.871333	0.173914	8.806748	0.013555
Aurora B	110	121	AREKQNKFIMAL		1448.804200	no-P(astr)	10.000000	1451.950840	0.168429	2.129536	0.198210	8.796491	0.033340
Aurora B	110	121	AREKQNKFIMAL		1448.804200	no-P(astr)	30.000002	1452.547937	0.206706	2.726633	0.231617	8.791676	0.031856
Aurora B	110	121	AREKQNKFIMAL		1448.804200	no-P(astr)	90.000008	1453.362534	0.267050	3.541230	0.286765	8.791126	0.032533
Aurora B	110	121	AREKQNKFIMAL		1448.804200	no-P(astr)	300.000000	1453.756546	0.266313	3.935242	0.286079	8.793813	0.030295
Aurora B	110	121	AREKQNKFIMAL		1448.804200	no-P(astr)	MAX	1457.367565	0.396603	7.546261	0.410137	8.801922	0.001561
Aurora B	110	121	AREKQNKFIMAL		1448.804200	loop-P	0.000000	1449.814895	0.121105	0.000000	0.000000	8.778592	0.003153
Aurora B	110	121	AREKQNKFIMAL		1448.804200	loop-P	3.000000	1451.595138	0.167509	1.780243	0.206701	8.796895	0.032149
Aurora B	110	121	AREKQNKFIMAL		1448.804200	loop-P	10.000000	1451.723624	0.150145	1.908730	0.192898	8.791922	0.034957
Aurora B	110	121	AREKQNKFIMAL		1448.804200	loop-P	30.000002	1451.955026	0.177678	2.140131	0.215025	8.786383	0.029711
Aurora B	110	121	AREKQNKFIMAL		1448.804200	loop-P	90.000008	1452.559181	0.187558	2.744286	0.223258	8.794657	0.031771
Aurora B	110	121	AREKQNKFIMAL		1448.804200	loop-P	300.000000	1453.558780	0.165737	3.743885	0.205268	8.789030	0.029288
Aurora B	110	121	AREKQNKFIMAL		1448.804200	loop-P	MAX	1457.367565	0.396603	7.552670	0.414681	8.801922	0.001561
Aurora B	110	121	AREKQNKFIMAL		1448.804200	IN-P	0.000000	1449.949542	0.133002	0.000000	0.000000	8.783443	0.005135
Aurora B	110	121	AREKQNKFIMAL		1448.804200	IN-P	3.000000	1451.583313	0.160627	1.633771	0.208544	8.755716	0.001839
Aurora B	110	121	AREKQNKFIMAL		1448.804200	IN-P	10.000000	1451.858534	0.150170	1.908993	0.200601	8.789522	0.031782
Aurora B	110	121	AREKQNKFIMAL		1448.804200	IN-P	30.000002	1452.195641	0.206742	2.246099	0.245829	8.789472	0.026674
Aurora B	110	121	AREKQNKFIMAL		1448.804200	IN-P	90.000008	1452.827325	0.242130	2.877784	0.276255	8.782457	0.029569
Aurora B	110	121	AREKQNKFIMAL		1448.804200	IN-P	300.000000	1453.398207	0.208580	3.448665	0.247377	8.787889	0.027116
Aurora B	110	121	AREKQNKFIMAL		1448.804200	IN-P	MAX	1457.367565	0.396603	7.418023	0.418310	8.801922	0.001561
Aurora B	118	121	IMAL		447.263600	all-P(astr)	0.000000	447.696955	0.026291	0.000000	0.000000	8.713000	0.003790
Aurora B	118	121	IMAL		447.263600	all-P(astr)	3.000000	447.900768	0.009014	0.203813	0.027793	8.727770	0.048331
Aurora B	118	121	IMAL		447.263600	all-P(astr)	10.000000	447.951507	0.017433	0.254552	0.031546	8.733868	0.042608
Aurora B	118	121	IMAL		447.263600	all-P(astr)	30.000002	447.935630	0.062030	0.238675	0.067372	8.744526	0.044039
Aurora B	118	121	IMAL		447.263600	all-P(astr)	90.000008	447.942540	0.068190	0.245585	0.073083	8.735185	0.037830
Aurora B	118	121	IMAL		447.263600	all-P(astr)	300.000000	447.915266	0.019797	0.218311	0.032911	8.735552	0.040143
Aurora B	118	121	IMAL		447.263600	all-P(astr)	MAX	449.173338	0.004853	1.476383	0.026735	8.786652	0.001326
Aurora B	118	121	IMAL		447.263600	no-P(astr)	0.000000	447.666005	0.017924	0.000000	0.000000	8.708252	0.001872
Aurora B	118	121	IMAL		447.263600	no-P(astr)	3.000000	447.925504	0.018922	0.259499	0.026063	8.743037	0.027999
Aurora B	118	121	IMAL		447.263600	no-P(astr)	10.000000	447.913522	0.044045	0.247517	0.047552	8.739596	0.044600
Aurora B	118	121	IMAL		447.263600	no-P(astr)	30.000002	447.931475	0.041666	0.265470	0.045358	8.734601	0.043194
Aurora B	118	121	IMAL		447.263600	no-P(astr)	90.000008	447.931944	0.042531	0.265938	0.046153	8.734665	0.040162
Aurora B	118	121	IMAL		447.263600	no-P(astr)	300.000000	447.868524	0.045802	0.202518	0.049184	8.736932	0.041306
Aurora B	118	121	IMAL		447.263600	no-P(astr)	MAX	449.173338	0.004853	1.507332	0.018569	8.786652	0.001326
Aurora B	118	121	IMAL		447.263600	loop-P	0.000000	447.709690	0.024110	0.000000	0.000000	8.697654	0.002464
Aurora B	118	121	IMAL		447.263600	loop-P	3.000000	447.867836	0.029345	0.158145	0.037979	8.742082	0.042761
Aurora B	118	121	IMAL		447.263600	loop-P	10.000000	447.880171	0.037632	0.170481	0.044692	8.740021	0.046012
Aurora B	118	121	IMAL		447.263600	loop-P	30.000002	447.888718	0.021885	0.179027	0.032561	8.739104	0.039949
Aurora B	118	121	IMAL		447.263600	loop-P	90.000008	447.829876	0.029610	0.120186	0.038184	8.742778	0.041035
Aurora B	118	121	IMAL		447.263600	loop-P	300.000000	447.854862	0.034322	0.145172	0.041944	8.734194	0.037565
Aurora B	118	121	IMAL		447.263600	loop-P	MAX	449.173338	0.004853	1.463648	0.024593	8.786652	0.001326
Aurora B	118	121	IMAL		447.263600	IN-P	0.000000	447.869051	0.005714	0.000000	0.000000	8.701515	0.004783
Aurora B	118	121	IMAL		447.263600	IN-P	3.000000	447.984116	0.035843	0.115065	0.036296	8.729148	0.039282
Aurora B	118	121	IMAL		447.263600	IN-P	10.000000	447.984026	0.024253	0.114975	0.024917	8.736366	0.043058
Aurora B	118	121	IMAL		447.263600	IN-P	30.000002	447.985112	0.037445	0.116061	0.037879	8.733108	0.036613
Aurora B	118	121	IMAL		447.263600	IN-P	90.000008	447.987045	0.012971	0.117994	0.014174	8.729085	0.040812
Aurora B	118	121	IMAL		447.263600	IN-P	300.000000	447.985927	0.038894	0.116876	0.039312	8.734221	0.037576
Aurora B	118	121	IMAL		447.263600	IN-P	MAX	449.173338	0.004853	1.304287	0.007497	8.786652	0.001326
Aurora B	120	125	ALKVLF		690.454900	all-P(astr)	0.000000	690.814090	0.069709	0.000000	0.000000	9.622546	0.006769
Aurora B	120	125	ALKVLF		690.454900	all-P(astr)	3.000000	691.276414	0.030098	0.462324	0.075929	9.617187	0.047239
Aurora B	120	125	ALKVLF		690.454900	all-P(astr)	10.000000	691.566861	0.043552	0.752771	0.082195	9.617930	0.041526
Aurora B	120	125	ALKVLF		690.454900	all-P(astr)	30.000002	691.634667	0.028656	0.820577	0.075369	9.632611	0.045126
Aurora B	120	125	ALKVLF		690.454900	all-P(astr)	90.000008	691.677992	0.009895	0.863902	0.070408	9.624127	0.034123
Aurora B	120	125	ALKVLF		690.454900	all-P(astr)	300.000000	691.727380	0.041863	0.913290	0.081313	9.622118	0.040998
Aurora B	120	125	ALKVLF		690.454900	all-P(astr)	MAX	694.382129	0.046796	3.568039	0.083959	9.656697	0.003010
Aurora B	120	125	ALKVLF		690.454900	no-P(astr)	0.000000	690.764521	0.057822	0.000000	0.000000	9.613432	0.004543
Aurora B	120	125	ALKVLF		690.454900	no-P(astr)	3.000000	691.539824	0.024391	0.775303	0.062756	9.637535	0.020639
Aurora B	120	125	ALKVLF		690.454900	no-P(astr)	10.000000	691.612782	0.014510	0.848261	0.059615	9.623381	0.042464
Aurora B	120	125	ALKVLF		690.454900	no-P(astr)	30.000002	691.665760	0.028150	0.901238	0.064310	9.624837	0.042612
Aurora B	120	125	ALKVLF		690.454900	no-P(astr)	90.000008	691.726803	0.040577	0.962281	0.070639	9.621889	0.038986
Aurora B	120	125	ALKVLF		690.454900	no-P(astr)	300.000000	691.829400	0.060540	1.064878	0.083716	9.625463	0.041774
Aurora B	120	125	ALKVLF		690.454900	no-P(astr)	MAX	694.382129	0.046796	3.617608	0.074386	9.656697	0.003010
Aurora B	120	125	ALKVLF		690.454900	loop-P	0.000000	690.805417	0.069738	0.000000	0.000000	9.596009	0.005070
Aurora B	120	125	ALKVLF		690.454900	loop-P	3.000000	691.551553	0.009234	0.746136	0.070346	9.630982	0.038956
Aurora B	120	125	ALKVLF		690.454900	loop-P	10.000000	691.659738	0.031484	0.854321	0.076515	9.624411	0.044977
Aurora B	120	125	ALKVLF		690.454900	loop-P	30.000002	691.651787	0.004665	0.846370	0.069894	9.618638	0.037156
Aurora B	120	125	ALKVLF		690.454900	loop-P	90.000008	691.667589	0.013187	0.862172	0.070973	9.629218	0.040752
Aurora B	120	125	ALKVLF		690.454900	loop-P	300.000000	691.764354	0.010405	0.958937	0.070510	9.619096	0.038090
Aurora B	120	125	ALKVLF		690.454900	loop-P	MAX	694.382129	0.046796	3.576712	0.083983	9.656697	0.003010
Aurora B	120	125	ALKVLF		690.454900	IN-P	0.000000	690.856168	0.036666	0.000000	0.000000	9.598516	0.002570
Aurora B	120	125	ALKVLF		690.454900	IN-P	3.000000	691.494839	0.044427	0.638671	0.057604	9.615478	0.039019
Aurora B	120	125	ALKVLF		690.454900	IN-P	10.000000	691.645282	0.034831	0.789114	0.050573	9.622469	0.041895
Aurora B	120	125	ALKVLF		690.454900	IN-P	30.000002	691.649113	0.011283	0.792946	0.038363	9.619009	0.035287
Aurora B	120	125	ALKVLF		690.454900	IN-P	90.000008	691.727672	0.036120	0.871505	0.051469	9.614999	0.040290
Aurora B	120	125	ALKVLF		690.454900	IN-P	300.000000	691.748256	0.015840	0.892088	0.039942	9.621139	0.040391
Aurora B	120	125	ALKVLF		690.454900	IN-P	MAX	694.382129	0.046796	3.525962	0.059450	9.656697	0.003010
Aurora B	121	125	LKVLF		619.417800	all-P(astr)	0.000000	619.737126	0.002468	0.000000	0.000000	9.517899	0.004856
Aurora B	121	125	LKVLF		619.417800	all-P(astr)	3.000000	620.215646	0.026561	0.478520	0.026675	9.519552	0.048192
Aurora B	121	125	LKVLF		619.417800	all-P(astr)	10.000000	620.498659	0.023693	0.761532	0.023822	9.526258	0.041340
Aurora B	121	125	LKVLF		619.417800	all-P(astr)	30.000002	620.597712	0.001624	0.860586	0.002954	9.535348	0.043047
Aurora B	121	125	LKVLF		619.417800	all-P(astr)	90.000008	620.622211	0.010239	0.885085	0.010532	9.527428	0.035072
Aurora B	121	125	LKVLF		619.417800	all-P(astr)	300.000000	620.659498	0.012431	0.922372	0.012674	9.527689	0.039129
Aurora B	121	125	LKVLF		619.417800	all-P(astr)	MAX	622.525288	0.002032	2.788162	0.003197	9.557446	9.185738E-5
Aurora B	121	125	LKVLF		619.417800	no-P(astr)	0.000000	619.722418	0.004179	0.000000	0.000000	9.516226	0.002517
Aurora B	121	125	LKVLF		619.417800	no-P(astr)	3.000000	620.510318	0.000796	0.787900	0.004254	9.538750	0.022380
Aurora B	121	125	LKVLF		619.417800	no-P(astr)	10.000000	620.576133	0.002795	0.853715	0.005028	9.528856	0.042702
Aurora B	121	125	LKVLF		619.417800	no-P(astr)	30.000002	620.622113	0.000368	0.899695	0.004196	9.526595	0.041859
Aurora B	121	125	LKVLF		619.417800	no-P(astr)	90.000008	620.698518	0.011940	0.976100	0.012650	9.529737	0.041932
Aurora B	121	125	LKVLF		619.417800	no-P(astr)	300.000000	620.817620	0.038168	1.095202	0.038396	9.530612	0.039325
Aurora B	121	125	LKVLF		619.417800	no-P(astr)	MAX	622.525288	0.002032	2.802870	0.004647	9.557446	9.185738E-5
Aurora B	121	125	LKVLF		619.417800	loop-P	0.000000	619.732245	0.012067	0.000000	0.000000	9.498911	0.001669
Aurora B	121	125	LKVLF		619.417800	loop-P	3.000000	620.500862	0.005415	0.768617	0.013226	9.535014	0.040142
Aurora B	121	125	LKVLF		619.417800	loop-P	10.000000	620.567621	0.014127	0.835376	0.018579	9.527927	0.045240
Aurora B	121	125	LKVLF		619.417800	loop-P	30.000002	620.585763	0.003407	0.853517	0.012539	9.522922	0.039723
Aurora B	121	125	LKVLF		619.417800	loop-P	90.000008	620.625326	0.009048	0.893081	0.015082	9.525695	0.042347
Aurora B	121	125	LKVLF		619.417800	loop-P	300.000000	620.733131	0.001781	1.000885	0.012197	9.524163	0.037932
Aurora B	121	125	LKVLF		619.417800	loop-P	MAX	622.525288	0.002032	2.793043	0.012237	9.557446	9.185738E-5
Aurora B	121	125	LKVLF		619.417800	IN-P	0.000000	619.789412	0.006344	0.000000	0.000000	9.502800	0.003468
Aurora B	121	125	LKVLF		619.417800	IN-P	3.000000	620.412425	0.014466	0.623013	0.015796	9.520865	0.039071
Aurora B	121	125	LKVLF		619.417800	IN-P	10.000000	620.575087	0.016028	0.785675	0.017238	9.524916	0.043139
Aurora B	121	125	LKVLF		619.417800	IN-P	30.000002	620.633886	0.011014	0.844474	0.012710	9.524606	0.036288
Aurora B	121	125	LKVLF		619.417800	IN-P	90.000008	620.663524	0.018405	0.874111	0.019468	9.516355	0.041260
Aurora B	121	125	LKVLF		619.417800	IN-P	300.000000	620.715895	0.001313	0.926482	0.006479	9.523860	0.037601
Aurora B	121	125	LKVLF		619.417800	IN-P	MAX	622.525288	0.002032	2.735876	0.006662	9.557446	9.185738E-5
Aurora B	121	128	LKVLFKSQ		962.603300	all-P(astr)	3.000000	962.789708	0.026621	NaN	NaN	7.856229	0.036185
Aurora B	121	128	LKVLFKSQ		962.603300	all-P(astr)	10.000000	962.850472	0.041303	NaN	NaN	7.857174	0.032810
Aurora B	121	128	LKVLFKSQ		962.603300	all-P(astr)	30.000002	962.822088	0.075178	NaN	NaN	7.863362	0.031798
Aurora B	121	128	LKVLFKSQ		962.603300	all-P(astr)	90.000008	962.916016	0.021053	NaN	NaN	7.858877	0.027566
Aurora B	121	128	LKVLFKSQ		962.603300	all-P(astr)	300.000000	962.995982	0.080017	NaN	NaN	7.854946	0.026325
Aurora B	121	128	LKVLFKSQ		962.603300	all-P(astr)	MAX	966.389348	0.015728	NaN	NaN	7.856294	0.000924
Aurora B	121	128	LKVLFKSQ		962.603300	no-P(astr)	0.000000	962.730116	1.136868E-13	0.000000	0.000000	7.843804	0.000000
Aurora B	121	128	LKVLFKSQ		962.603300	no-P(astr)	3.000000	962.808292	0.020003	0.078176	0.020003	7.867455	0.020420
Aurora B	121	128	LKVLFKSQ		962.603300	no-P(astr)	10.000000	962.763150	0.012595	0.033034	0.012595	7.860746	0.033801
Aurora B	121	128	LKVLFKSQ		962.603300	no-P(astr)	30.000002	962.846273	0.002999	0.116157	0.002999	7.859756	0.032169
Aurora B	121	128	LKVLFKSQ		962.603300	no-P(astr)	90.000008	962.955177	0.048722	0.225061	0.048722	7.860932	0.032049
Aurora B	121	128	LKVLFKSQ		962.603300	no-P(astr)	300.000000	962.987715	0.034716	0.257600	0.034716	7.858690	0.028685
Aurora B	121	128	LKVLFKSQ		962.603300	no-P(astr)	MAX	966.389348	0.015728	3.659232	0.015728	7.856294	0.000924
Aurora B	121	128	LKVLFKSQ		962.603300	loop-P	3.000000	962.860655	1.136868E-13	NaN	NaN	7.890598	0.000000
Aurora B	121	128	LKVLFKSQ		962.603300	loop-P	10.000000	962.797709	1.136868E-13	NaN	NaN	7.808995	0.000000
Aurora B	121	128	LKVLFKSQ		962.603300	loop-P	30.000002	962.843189	0.006318	NaN	NaN	7.852953	0.030619
Aurora B	121	128	LKVLFKSQ		962.603300	loop-P	90.000008	962.775854	0.006525	NaN	NaN	7.860937	0.030927
Aurora B	121	128	LKVLFKSQ		962.603300	loop-P	300.000000	962.848741	0.064199	NaN	NaN	7.852721	0.028392
Aurora B	121	128	LKVLFKSQ		962.603300	loop-P	MAX	966.389348	0.015728	NaN	NaN	7.856294	0.000924
Aurora B	121	128	LKVLFKSQ		962.603300	IN-P	0.000000	962.760674	0.001975	0.000000	0.000000	7.842116	0.001784
Aurora B	121	128	LKVLFKSQ		962.603300	IN-P	3.000000	962.856840	0.015562	0.096166	0.015687	7.849833	0.028830
Aurora B	121	128	LKVLFKSQ		962.603300	IN-P	10.000000	962.770820	0.016889	0.010146	0.017004	7.853920	0.033263
Aurora B	121	128	LKVLFKSQ		962.603300	IN-P	30.000002	962.898451	0.039186	0.137777	0.039236	7.853725	0.023424
Aurora B	121	128	LKVLFKSQ		962.603300	IN-P	90.000008	962.997217	0.082916	0.236543	0.082940	7.846074	0.029563
Aurora B	121	128	LKVLFKSQ		962.603300	IN-P	300.000000	962.946457	0.018383	0.185782	0.018489	7.852915	0.031287
Aurora B	121	128	LKVLFKSQ		962.603300	IN-P	MAX	966.389348	0.015728	3.628673	0.015852	7.856294	0.000924
Aurora B	121	129	LKVLFKSQL		1075.687400	all-P(astr)	0.000000	1076.231205	0.009967	0.000000	0.000000	8.334701	0.001323
Aurora B	121	129	LKVLFKSQL		1075.687400	all-P(astr)	3.000000	1078.091161	0.111657	1.859956	0.112101	8.342234	0.039260
Aurora B	121	129	LKVLFKSQL		1075.687400	all-P(astr)	10.000000	1078.620947	0.123357	2.389742	0.123759	8.341285	0.033437
Aurora B	121	129	LKVLFKSQL		1075.687400	all-P(astr)	30.000002	1079.030727	0.123690	2.799522	0.124091	8.348831	0.035771
Aurora B	121	129	LKVLFKSQL		1075.687400	all-P(astr)	90.000008	1079.398803	0.118687	3.167598	0.119105	8.343802	0.026292
Aurora B	121	129	LKVLFKSQL		1075.687400	all-P(astr)	300.000000	1079.870906	0.133839	3.639701	0.134210	8.336438	0.033999
Aurora B	121	129	LKVLFKSQL		1075.687400	all-P(astr)	MAX	1082.350798	0.087412	6.119593	0.087978	8.366586	0.000463
Aurora B	121	129	LKVLFKSQL		1075.687400	no-P(astr)	0.000000	1076.265948	0.034170	0.000000	0.000000	8.330597	0.005122
Aurora B	121	129	LKVLFKSQL		1075.687400	no-P(astr)	3.000000	1078.701861	0.044054	2.435914	0.055753	8.356005	0.021571
Aurora B	121	129	LKVLFKSQL		1075.687400	no-P(astr)	10.000000	1079.002463	0.072962	2.736516	0.080567	8.346665	0.035720
Aurora B	121	129	LKVLFKSQL		1075.687400	no-P(astr)	30.000002	1079.673478	0.086721	3.407531	0.093210	8.340143	0.034057
Aurora B	121	129	LKVLFKSQL		1075.687400	no-P(astr)	90.000008	1079.920009	0.118020	3.654061	0.122867	8.343702	0.037197
Aurora B	121	129	LKVLFKSQL		1075.687400	no-P(astr)	300.000000	1080.036543	0.137227	3.770595	0.141417	8.348613	0.030023
Aurora B	121	129	LKVLFKSQL		1075.687400	no-P(astr)	MAX	1082.350798	0.087412	6.084850	0.093853	8.366586	0.000463
Aurora B	121	129	LKVLFKSQL		1075.687400	loop-P	0.000000	1076.213548	0.001134	0.000000	0.000000	8.316840	0.003972
Aurora B	121	129	LKVLFKSQL		1075.687400	loop-P	3.000000	1078.525714	0.026254	2.312165	0.026279	8.346291	0.036756
Aurora B	121	129	LKVLFKSQL		1075.687400	loop-P	10.000000	1078.975475	0.107314	2.761926	0.107320	8.341648	0.038428
Aurora B	121	129	LKVLFKSQL		1075.687400	loop-P	30.000002	1079.531751	0.055711	3.318202	0.055723	8.341377	0.029272
Aurora B	121	129	LKVLFKSQL		1075.687400	loop-P	90.000008	1079.861697	0.118844	3.648149	0.118849	8.343441	0.034397
Aurora B	121	129	LKVLFKSQL		1075.687400	loop-P	300.000000	1080.022100	0.040039	3.808552	0.040055	8.337750	0.033536
Aurora B	121	129	LKVLFKSQL		1075.687400	loop-P	MAX	1082.350798	0.087412	6.137250	0.087419	8.366586	0.000463
Aurora B	121	129	LKVLFKSQL		1075.687400	IN-P	0.000000	1076.258616	0.023841	0.000000	0.000000	8.320084	0.005734
Aurora B	121	129	LKVLFKSQL		1075.687400	IN-P	3.000000	1078.377537	0.057095	2.118921	0.061873	8.337461	0.033104
Aurora B	121	129	LKVLFKSQL		1075.687400	IN-P	10.000000	1078.920849	0.012157	2.662233	0.026762	8.342493	0.034509
Aurora B	121	129	LKVLFKSQL		1075.687400	IN-P	30.000002	1079.328895	0.052781	3.070279	0.057916	8.340380	0.030545
Aurora B	121	129	LKVLFKSQL		1075.687400	IN-P	90.000008	1079.890440	0.056829	3.631824	0.061628	8.331015	0.033635
Aurora B	121	129	LKVLFKSQL		1075.687400	IN-P	300.000000	1080.054526	0.012698	3.795910	0.027012	8.340188	0.032083
Aurora B	121	129	LKVLFKSQL		1075.687400	IN-P	MAX	1082.350798	0.087412	6.092182	0.090605	8.366586	0.000463
Aurora B	122	125	KVLF		506.333700	all-P(astr)	0.000000	506.608824	0.009644	0.000000	0.000000	8.445119	0.002510
Aurora B	122	125	KVLF		506.333700	all-P(astr)	3.000000	507.114145	0.022276	0.505321	0.024274	8.437181	0.035189
Aurora B	122	125	KVLF		506.333700	all-P(astr)	10.000000	507.379138	0.002427	0.770314	0.009945	8.439330	0.030498
Aurora B	122	125	KVLF		506.333700	all-P(astr)	30.000002	507.470537	0.014240	0.861713	0.017198	8.446701	0.032795
Aurora B	122	125	KVLF		506.333700	all-P(astr)	90.000008	507.463427	0.005976	0.854603	0.011346	8.438376	0.025547
Aurora B	122	125	KVLF		506.333700	all-P(astr)	300.000000	507.465006	0.001039	0.856182	0.009700	8.438875	0.029213
Aurora B	122	125	KVLF		506.333700	all-P(astr)	MAX	508.355429	0.028081	1.746605	0.029691	8.452573	0.000794
Aurora B	122	125	KVLF		506.333700	no-P(astr)	0.000000	506.602815	0.009665	0.000000	0.000000	8.441961	0.004111
Aurora B	122	125	KVLF		506.333700	no-P(astr)	3.000000	507.393882	0.003964	0.791067	0.010447	8.450662	0.016090
Aurora B	122	125	KVLF		506.333700	no-P(astr)	10.000000	507.439947	0.005557	0.837132	0.011149	8.444193	0.030117
Aurora B	122	125	KVLF		506.333700	no-P(astr)	30.000002	507.452927	0.000428	0.850112	0.009675	8.441717	0.032620
Aurora B	122	125	KVLF		506.333700	no-P(astr)	90.000008	507.485019	0.002991	0.882204	0.010118	8.440889	0.029948
Aurora B	122	125	KVLF		506.333700	no-P(astr)	300.000000	507.506469	0.021958	0.903654	0.023991	8.442006	0.026191
Aurora B	122	125	KVLF		506.333700	no-P(astr)	MAX	508.355429	0.028081	1.752614	0.029698	8.452573	0.000794
Aurora B	122	125	KVLF		506.333700	loop-P	0.000000	506.626236	0.005323	0.000000	0.000000	8.427282	0.003297
Aurora B	122	125	KVLF		506.333700	loop-P	3.000000	507.345219	0.007681	0.718983	0.009345	8.448914	0.029590
Aurora B	122	125	KVLF		506.333700	loop-P	10.000000	507.420650	0.014834	0.794413	0.015760	8.441333	0.033420
Aurora B	122	125	KVLF		506.333700	loop-P	30.000002	507.445696	0.003680	0.819460	0.006471	8.435084	0.027580
Aurora B	122	125	KVLF		506.333700	loop-P	90.000008	507.420218	0.011048	0.793982	0.012263	8.444589	0.028747
Aurora B	122	125	KVLF		506.333700	loop-P	300.000000	507.450222	0.022237	0.823986	0.022865	8.440402	0.026151
Aurora B	122	125	KVLF		506.333700	loop-P	MAX	508.355429	0.028081	1.729193	0.028581	8.452573	0.000794
Aurora B	122	125	KVLF		506.333700	IN-P	0.000000	506.698667	0.008988	0.000000	0.000000	8.432392	0.005279
Aurora B	122	125	KVLF		506.333700	IN-P	3.000000	507.297244	0.026776	0.598577	0.028244	8.434646	0.025845
Aurora B	122	125	KVLF		506.333700	IN-P	10.000000	507.459240	0.008053	0.760574	0.012068	8.436951	0.029902
Aurora B	122	125	KVLF		506.333700	IN-P	30.000002	507.460443	0.009929	0.761777	0.013393	8.434058	0.025137
Aurora B	122	125	KVLF		506.333700	IN-P	90.000008	507.492934	0.003782	0.794267	0.009751	8.432908	0.027021
Aurora B	122	125	KVLF		506.333700	IN-P	300.000000	507.489279	0.007375	0.790612	0.011627	8.436385	0.024525
Aurora B	122	125	KVLF		506.333700	IN-P	MAX	508.355429	0.028081	1.656762	0.029484	8.452573	0.000794
Aurora B	122	129	KVLFKSQL		962.603300	all-P(astr)	0.000000	963.251480	0.053893	0.000000	0.000000	7.596258	0.002869
Aurora B	122	129	KVLFKSQL		962.603300	all-P(astr)	3.000000	965.114483	0.028522	1.863003	0.060975	7.596865	0.033808
Aurora B	122	129	KVLFKSQL		962.603300	all-P(astr)	10.000000	965.661278	0.025271	2.409799	0.059524	7.596108	0.026844
Aurora B	122	129	KVLFKSQL		962.603300	all-P(astr)	30.000002	966.035876	0.044269	2.784396	0.069744	7.604251	0.029322
Aurora B	122	129	KVLFKSQL		962.603300	all-P(astr)	90.000008	966.418170	0.032346	3.166690	0.062855	7.592740	0.021359
Aurora B	122	129	KVLFKSQL		962.603300	all-P(astr)	300.000000	966.767421	0.019883	3.515942	0.057444	7.594112	0.026456
Aurora B	122	129	KVLFKSQL		962.603300	all-P(astr)	MAX	967.994588	0.025989	4.743109	0.059832	7.615561	0.000943
Aurora B	122	129	KVLFKSQL		962.603300	no-P(astr)	0.000000	963.244030	0.053891	0.000000	0.000000	7.593227	0.003034
Aurora B	122	129	KVLFKSQL		962.603300	no-P(astr)	3.000000	965.662722	0.021242	2.418692	0.057926	7.604161	0.018983
Aurora B	122	129	KVLFKSQL		962.603300	no-P(astr)	10.000000	966.080129	0.061199	2.836100	0.081545	7.601676	0.027596
Aurora B	122	129	KVLFKSQL		962.603300	no-P(astr)	30.000002	966.639483	0.043810	3.395453	0.069452	7.597923	0.027763
Aurora B	122	129	KVLFKSQL		962.603300	no-P(astr)	90.000008	966.874581	0.018887	3.630552	0.057105	7.596421	0.028125
Aurora B	122	129	KVLFKSQL		962.603300	no-P(astr)	300.000000	966.851945	0.039448	3.607916	0.066786	7.597910	0.026564
Aurora B	122	129	KVLFKSQL		962.603300	no-P(astr)	MAX	967.994588	0.025989	4.750559	0.059830	7.615561	0.000943
Aurora B	122	129	KVLFKSQL		962.603300	loop-P	0.000000	963.204283	0.049589	0.000000	0.000000	7.578194	0.002261
Aurora B	122	129	KVLFKSQL		962.603300	loop-P	3.000000	965.522909	0.033966	2.318626	0.060106	7.600843	0.027043
Aurora B	122	129	KVLFKSQL		962.603300	loop-P	10.000000	965.940623	0.015348	2.736339	0.051910	7.596962	0.032072
Aurora B	122	129	KVLFKSQL		962.603300	loop-P	30.000002	966.459712	0.018753	3.255429	0.053017	7.595858	0.025881
Aurora B	122	129	KVLFKSQL		962.603300	loop-P	90.000008	966.820827	0.015684	3.616544	0.052010	7.600924	0.027574
Aurora B	122	129	KVLFKSQL		962.603300	loop-P	300.000000	966.858735	0.016699	3.654452	0.052325	7.594694	0.023433
Aurora B	122	129	KVLFKSQL		962.603300	loop-P	MAX	967.994588	0.025989	4.790305	0.055987	7.615561	0.000943
Aurora B	122	129	KVLFKSQL		962.603300	IN-P	0.000000	963.306525	0.066198	0.000000	0.000000	7.586352	0.003152
Aurora B	122	129	KVLFKSQL		962.603300	IN-P	3.000000	965.390359	0.062913	2.083833	0.091325	7.589148	0.023647
Aurora B	122	129	KVLFKSQL		962.603300	IN-P	10.000000	965.883440	0.034702	2.576915	0.074742	7.589892	0.028553
Aurora B	122	129	KVLFKSQL		962.603300	IN-P	30.000002	966.342648	0.028509	3.036122	0.072076	7.589736	0.024982
Aurora B	122	129	KVLFKSQL		962.603300	IN-P	90.000008	966.831856	0.037294	3.525331	0.075981	7.586911	0.024810
Aurora B	122	129	KVLFKSQL		962.603300	IN-P	300.000000	966.904520	0.050806	3.597994	0.083447	7.592774	0.023151
Aurora B	122	129	KVLFKSQL		962.603300	IN-P	MAX	967.994588	0.025989	4.688063	0.071117	7.615561	0.000943
Aurora B	130	137	EKEGVEHQ		955.448000	all-P(astr)	0.000000	955.776736	0.016102	0.000000	0.000000	2.581280	0.001666
Aurora B	130	137	EKEGVEHQ		955.448000	all-P(astr)	3.000000	958.919752	0.034954	3.143015	0.038485	2.588394	0.001914
Aurora B	130	137	EKEGVEHQ		955.448000	all-P(astr)	10.000000	959.438897	0.013478	3.662160	0.020999	2.588213	0.002005
Aurora B	130	137	EKEGVEHQ		955.448000	all-P(astr)	30.000002	959.621287	0.034613	3.844551	0.038175	2.586415	0.002505
Aurora B	130	137	EKEGVEHQ		955.448000	all-P(astr)	90.000008	959.768396	0.054241	3.991659	0.056581	2.586991	0.001143
Aurora B	130	137	EKEGVEHQ		955.448000	all-P(astr)	300.000000	959.881626	0.094113	4.104890	0.095480	2.588948	0.000948
Aurora B	130	137	EKEGVEHQ		955.448000	all-P(astr)	MAX	960.005823	0.024132	4.229087	0.029010	2.594243	0.000400
Aurora B	130	137	EKEGVEHQ		955.448000	no-P(astr)	0.000000	955.759541	0.014668	0.000000	0.000000	2.585603	0.002206
Aurora B	130	137	EKEGVEHQ		955.448000	no-P(astr)	3.000000	959.494650	0.111161	3.735109	0.112125	2.588264	0.002235
Aurora B	130	137	EKEGVEHQ		955.448000	no-P(astr)	10.000000	959.784474	0.062519	4.024933	0.064217	2.587335	0.002955
Aurora B	130	137	EKEGVEHQ		955.448000	no-P(astr)	30.000002	959.874057	0.014409	4.114517	0.020561	2.587773	0.000472
Aurora B	130	137	EKEGVEHQ		955.448000	no-P(astr)	90.000008	959.828363	0.001800	4.068822	0.014778	2.586313	0.002182
Aurora B	130	137	EKEGVEHQ		955.448000	no-P(astr)	300.000000	959.915944	0.008282	4.156403	0.016845	2.591445	0.003114
Aurora B	130	137	EKEGVEHQ		955.448000	no-P(astr)	MAX	960.005823	0.024132	4.246282	0.028240	2.594243	0.000400
Aurora B	130	137	EKEGVEHQ		955.448000	loop-P	0.000000	955.799142	0.049585	0.000000	0.000000	2.585890	0.000224
Aurora B	130	137	EKEGVEHQ		955.448000	loop-P	3.000000	959.814688	0.111635	4.015545	0.122152	2.586588	0.002955
Aurora B	130	137	EKEGVEHQ		955.448000	loop-P	10.000000	959.910988	0.071790	4.111846	0.087249	2.588387	0.001123
Aurora B	130	137	EKEGVEHQ		955.448000	loop-P	30.000002	959.917188	0.037108	4.118045	0.061932	2.589493	0.000929
Aurora B	130	137	EKEGVEHQ		955.448000	loop-P	90.000008	959.874716	0.063669	4.075574	0.080700	2.590714	0.001727
Aurora B	130	137	EKEGVEHQ		955.448000	loop-P	300.000000	959.865722	0.055193	4.066580	0.074195	2.591788	0.000806
Aurora B	130	137	EKEGVEHQ		955.448000	loop-P	MAX	960.005823	0.024132	4.206681	0.055145	2.594243	0.000400
Aurora B	130	137	EKEGVEHQ		955.448000	IN-P	0.000000	955.904474	0.019806	0.000000	0.000000	2.587507	0.001783
Aurora B	130	137	EKEGVEHQ		955.448000	IN-P	3.000000	959.471487	0.070333	3.567013	0.073068	2.589862	0.001488
Aurora B	130	137	EKEGVEHQ		955.448000	IN-P	10.000000	959.797299	0.072080	3.892825	0.074752	2.587311	0.005053
Aurora B	130	137	EKEGVEHQ		955.448000	IN-P	30.000002	959.881615	0.086383	3.977141	0.088625	2.588686	0.001004
Aurora B	130	137	EKEGVEHQ		955.448000	IN-P	90.000008	959.910461	0.051614	4.005988	0.055283	2.588239	0.004065
Aurora B	130	137	EKEGVEHQ		955.448000	IN-P	300.000000	959.825878	0.020640	3.921404	0.028606	2.590443	0.000284
Aurora B	130	137	EKEGVEHQ		955.448000	IN-P	MAX	960.005823	0.024132	4.101349	0.031219	2.594243	0.000400
Aurora B	130	141	EKEGVEHQLRRE		1509.776800	all-P(astr)	0.000000	1510.569377	0.049181	0.000000	0.000000	5.139649	0.005468
Aurora B	130	141	EKEGVEHQLRRE		1509.776800	all-P(astr)	3.000000	1513.081569	0.118382	2.512192	0.128191	5.121827	0.012747
Aurora B	130	141	EKEGVEHQLRRE		1509.776800	all-P(astr)	10.000000	1513.983937	0.180523	3.414560	0.187103	5.117983	0.003947
Aurora B	130	141	EKEGVEHQLRRE		1509.776800	all-P(astr)	30.000002	1514.794986	0.104806	4.225609	0.115772	5.121263	0.009159
Aurora B	130	141	EKEGVEHQLRRE		1509.776800	all-P(astr)	90.000008	1515.555081	0.139821	4.985704	0.148218	5.109385	0.001185
Aurora B	130	141	EKEGVEHQLRRE		1509.776800	all-P(astr)	300.000000	1516.218409	0.077148	5.649032	0.091491	5.111146	0.003621
Aurora B	130	141	EKEGVEHQLRRE		1509.776800	all-P(astr)	MAX	1517.052996	0.067464	6.483619	0.083488	5.091460	0.006281
Aurora B	130	141	EKEGVEHQLRRE		1509.776800	no-P(astr)	0.000000	1510.585021	0.062734	0.000000	0.000000	5.129077	0.005493
Aurora B	130	141	EKEGVEHQLRRE		1509.776800	no-P(astr)	3.000000	1514.168496	0.102141	3.583475	0.119868	5.119655	0.001145
Aurora B	130	141	EKEGVEHQLRRE		1509.776800	no-P(astr)	10.000000	1515.211898	0.077731	4.626877	0.099888	5.117421	0.003837
Aurora B	130	141	EKEGVEHQLRRE		1509.776800	no-P(astr)	30.000002	1516.170123	0.047058	5.585102	0.078422	5.111155	0.007980
Aurora B	130	141	EKEGVEHQLRRE		1509.776800	no-P(astr)	90.000008	1516.523826	0.094333	5.938805	0.113288	5.111233	0.007433
Aurora B	130	141	EKEGVEHQLRRE		1509.776800	no-P(astr)	300.000000	1516.616570	0.229006	6.031549	0.237443	5.113424	0.000714
Aurora B	130	141	EKEGVEHQLRRE		1509.776800	no-P(astr)	MAX	1517.052996	0.067464	6.467975	0.092125	5.091460	0.006281
Aurora B	130	141	EKEGVEHQLRRE		1509.776800	loop-P	0.000000	1510.583527	0.056353	0.000000	0.000000	5.136920	0.003329
Aurora B	130	141	EKEGVEHQLRRE		1509.776800	loop-P	3.000000	1513.877576	0.074416	3.294048	0.093345	5.120556	0.005733
Aurora B	130	141	EKEGVEHQLRRE		1509.776800	loop-P	10.000000	1514.506424	0.247808	3.922897	0.254134	5.120169	0.013140
Aurora B	130	141	EKEGVEHQLRRE		1509.776800	loop-P	30.000002	1515.445673	0.200585	4.862146	0.208351	5.109775	0.001386
Aurora B	130	141	EKEGVEHQLRRE		1509.776800	loop-P	90.000008	1516.116679	0.084666	5.533152	0.101705	5.113008	0.005069
Aurora B	130	141	EKEGVEHQLRRE		1509.776800	loop-P	300.000000	1516.489916	0.069712	5.906388	0.089640	5.108155	0.001212
Aurora B	130	141	EKEGVEHQLRRE		1509.776800	loop-P	MAX	1517.052996	0.067464	6.469468	0.087903	5.091460	0.006281
Aurora B	130	141	EKEGVEHQLRRE		1509.776800	IN-P	0.000000	1510.716858	0.113284	0.000000	0.000000	5.141769	0.006078
Aurora B	130	141	EKEGVEHQLRRE		1509.776800	IN-P	3.000000	1513.728931	0.161066	3.012073	0.196915	5.117244	0.001638
Aurora B	130	141	EKEGVEHQLRRE		1509.776800	IN-P	10.000000	1514.753295	0.091779	4.036436	0.145797	5.114128	0.006717
Aurora B	130	141	EKEGVEHQLRRE		1509.776800	IN-P	30.000002	1515.650672	0.131461	4.933813	0.173538	5.109174	0.001287
Aurora B	130	141	EKEGVEHQLRRE		1509.776800	IN-P	90.000008	1516.377237	0.131829	5.660379	0.173817	5.106951	0.002629
Aurora B	130	141	EKEGVEHQLRRE		1509.776800	IN-P	300.000000	1516.588330	0.059488	5.871472	0.127954	5.111072	0.003338
Aurora B	130	141	EKEGVEHQLRRE		1509.776800	IN-P	MAX	1517.052996	0.067464	6.336138	0.131851	5.091460	0.006281
Aurora B	130	143	EKEGVEHQLRREIE		1751.903500	all-P(astr)	0.000000	1753.233339	0.132338	0.000000	0.000000	6.464132	0.005340
Aurora B	130	143	EKEGVEHQLRREIE		1751.903500	all-P(astr)	3.000000	1755.856692	0.126766	2.623353	0.183256	6.449780	0.029645
Aurora B	130	143	EKEGVEHQLRREIE		1751.903500	all-P(astr)	10.000000	1756.795447	0.081835	3.562107	0.155597	6.439210	0.022459
Aurora B	130	143	EKEGVEHQLRREIE		1751.903500	all-P(astr)	30.000002	1757.586575	0.103657	4.353236	0.168102	6.442558	0.029251
Aurora B	130	143	EKEGVEHQLRREIE		1751.903500	all-P(astr)	90.000008	1758.309711	0.123977	5.076372	0.181338	6.429816	0.021719
Aurora B	130	143	EKEGVEHQLRREIE		1751.903500	all-P(astr)	300.000000	1759.156416	0.148657	5.923077	0.199028	6.425911	0.024857
Aurora B	130	143	EKEGVEHQLRREIE		1751.903500	all-P(astr)	MAX	1761.465541	0.076864	8.232202	0.153041	6.417068	0.004427
Aurora B	130	143	EKEGVEHQLRREIE		1751.903500	no-P(astr)	0.000000	1753.252210	0.147272	0.000000	0.000000	6.454577	0.003913
Aurora B	130	143	EKEGVEHQLRREIE		1751.903500	no-P(astr)	3.000000	1756.769425	0.185835	3.517215	0.237115	6.446363	0.015488
Aurora B	130	143	EKEGVEHQLRREIE		1751.903500	no-P(astr)	10.000000	1757.810230	0.108078	4.558019	0.182674	6.439885	0.023950
Aurora B	130	143	EKEGVEHQLRREIE		1751.903500	no-P(astr)	30.000002	1758.911966	0.111047	5.659755	0.184447	6.428223	0.028224
Aurora B	130	143	EKEGVEHQLRREIE		1751.903500	no-P(astr)	90.000008	1759.725496	0.128674	6.473286	0.195566	6.424315	0.029088
Aurora B	130	143	EKEGVEHQLRREIE		1751.903500	no-P(astr)	300.000000	1760.130554	0.275655	6.878343	0.312529	6.428337	0.022498
Aurora B	130	143	EKEGVEHQLRREIE		1751.903500	no-P(astr)	MAX	1761.465541	0.076864	8.213331	0.166124	6.417068	0.004427
Aurora B	130	143	EKEGVEHQLRREIE		1751.903500	loop-P	0.000000	1753.178369	0.196409	0.000000	0.000000	6.447140	0.003505
Aurora B	130	143	EKEGVEHQLRREIE		1751.903500	loop-P	3.000000	1756.414008	0.097364	3.235639	0.219218	6.448504	0.021224
Aurora B	130	143	EKEGVEHQLRREIE		1751.903500	loop-P	10.000000	1757.101243	0.122360	3.922874	0.231405	6.441153	0.029065
Aurora B	130	143	EKEGVEHQLRREIE		1751.903500	loop-P	30.000002	1757.887417	0.142098	4.709047	0.242422	6.434822	0.022686
Aurora B	130	143	EKEGVEHQLRREIE		1751.903500	loop-P	90.000008	1758.671769	0.157291	5.493400	0.251629	6.434523	0.024665
Aurora B	130	143	EKEGVEHQLRREIE		1751.903500	loop-P	300.000000	1759.518828	0.118083	6.340459	0.229173	6.424080	0.019573
Aurora B	130	143	EKEGVEHQLRREIE		1751.903500	loop-P	MAX	1761.465541	0.076864	8.287172	0.210914	6.417068	0.004427
Aurora B	130	143	EKEGVEHQLRREIE		1751.903500	IN-P	0.000000	1753.225147	0.125900	0.000000	0.000000	6.447805	0.004741
Aurora B	130	143	EKEGVEHQLRREIE		1751.903500	IN-P	3.000000	1756.376017	0.152158	3.150871	0.197492	6.440025	0.021486
Aurora B	130	143	EKEGVEHQLRREIE		1751.903500	IN-P	10.000000	1757.306680	0.126919	4.081533	0.178772	6.438785	0.028675
Aurora B	130	143	EKEGVEHQLRREIE		1751.903500	IN-P	30.000002	1758.283696	0.182828	5.058549	0.221984	6.430999	0.023068
Aurora B	130	143	EKEGVEHQLRREIE		1751.903500	IN-P	90.000008	1759.319266	0.277169	6.094119	0.304423	6.422493	0.026107
Aurora B	130	143	EKEGVEHQLRREIE		1751.903500	IN-P	300.000000	1759.637567	0.148211	6.412420	0.194467	6.422598	0.020177
Aurora B	130	143	EKEGVEHQLRREIE		1751.903500	IN-P	MAX	1761.465541	0.076864	8.240394	0.147509	6.417068	0.004427
Aurora B	130	154	EKEGVEHQLRREIEIQSHLRHPNIL		3060.645000	all-P(astr)	0.000000	3062.446633	0.064778	0.000000	0.000000	8.196440	0.005421
Aurora B	130	154	EKEGVEHQLRREIEIQSHLRHPNIL		3060.645000	all-P(astr)	3.000000	3065.298221	0.147011	2.851588	0.160650	8.176003	0.037291
Aurora B	130	154	EKEGVEHQLRREIEIQSHLRHPNIL		3060.645000	all-P(astr)	10.000000	3066.566007	0.154256	4.119375	0.167306	8.177646	0.029731
Aurora B	130	154	EKEGVEHQLRREIEIQSHLRHPNIL		3060.645000	all-P(astr)	30.000002	3067.810279	0.271640	5.363647	0.279257	8.178007	0.034381
Aurora B	130	154	EKEGVEHQLRREIEIQSHLRHPNIL		3060.645000	all-P(astr)	90.000008	3069.252517	0.336776	6.805884	0.342950	8.166084	0.027956
Aurora B	130	154	EKEGVEHQLRREIEIQSHLRHPNIL		3060.645000	all-P(astr)	300.000000	3070.940081	0.277629	8.493449	0.285086	8.156026	0.031425
Aurora B	130	154	EKEGVEHQLRREIEIQSHLRHPNIL		3060.645000	all-P(astr)	MAX	3078.100467	0.090318	15.653835	0.111147	8.186314	0.003092
Aurora B	130	154	EKEGVEHQLRREIEIQSHLRHPNIL		3060.645000	no-P(astr)	0.000000	3062.464720	0.093134	0.000000	0.000000	8.188684	0.002646
Aurora B	130	154	EKEGVEHQLRREIEIQSHLRHPNIL		3060.645000	no-P(astr)	3.000000	3066.718789	0.117730	4.254069	0.150114	8.197330	0.013032
Aurora B	130	154	EKEGVEHQLRREIEIQSHLRHPNIL		3060.645000	no-P(astr)	10.000000	3068.296035	0.171307	5.831315	0.194988	8.173465	0.033223
Aurora B	130	154	EKEGVEHQLRREIEIQSHLRHPNIL		3060.645000	no-P(astr)	30.000002	3070.116039	0.342182	7.651319	0.354630	8.165374	0.034035
Aurora B	130	154	EKEGVEHQLRREIEIQSHLRHPNIL		3060.645000	no-P(astr)	90.000008	3071.465851	0.486899	9.001131	0.495727	8.152028	0.032082
Aurora B	130	154	EKEGVEHQLRREIEIQSHLRHPNIL		3060.645000	no-P(astr)	300.000000	3072.574756	0.577856	10.110036	0.585314	8.157216	0.027149
Aurora B	130	154	EKEGVEHQLRREIEIQSHLRHPNIL		3060.645000	no-P(astr)	MAX	3078.143278	0.086424	15.678558	0.127056	8.188444	0.001415
Aurora B	130	154	EKEGVEHQLRREIEIQSHLRHPNIL		3060.645000	loop-P	0.000000	3062.499882	0.091066	0.000000	0.000000	8.176141	0.004573
Aurora B	130	154	EKEGVEHQLRREIEIQSHLRHPNIL		3060.645000	loop-P	3.000000	3066.105258	0.106948	3.605376	0.140467	8.192090	0.034747
Aurora B	130	154	EKEGVEHQLRREIEIQSHLRHPNIL		3060.645000	loop-P	10.000000	3067.192302	0.221032	4.692420	0.239057	8.181304	0.037489
Aurora B	130	154	EKEGVEHQLRREIEIQSHLRHPNIL		3060.645000	loop-P	30.000002	3068.701334	0.294679	6.201452	0.308429	8.171770	0.029100
Aurora B	130	154	EKEGVEHQLRREIEIQSHLRHPNIL		3060.645000	loop-P	90.000008	3069.943735	0.397101	7.443853	0.407409	8.171259	0.029259
Aurora B	130	154	EKEGVEHQLRREIEIQSHLRHPNIL		3060.645000	loop-P	300.000000	3071.480991	0.345691	8.981109	0.357485	8.155436	0.028056
Aurora B	130	154	EKEGVEHQLRREIEIQSHLRHPNIL		3060.645000	loop-P	MAX	3078.143278	0.086424	15.643396	0.125547	8.188444	0.001415
Aurora B	130	154	EKEGVEHQLRREIEIQSHLRHPNIL		3060.645000	IN-P	0.000000	3062.607359	0.141539	0.000000	0.000000	8.171124	0.004789
Aurora B	130	154	EKEGVEHQLRREIEIQSHLRHPNIL		3060.645000	IN-P	3.000000	3066.168884	0.209227	3.561524	0.252605	8.173011	0.032531
Aurora B	130	154	EKEGVEHQLRREIEIQSHLRHPNIL		3060.645000	IN-P	10.000000	3067.615018	0.217230	5.007659	0.259272	8.172599	0.032955
Aurora B	130	154	EKEGVEHQLRREIEIQSHLRHPNIL		3060.645000	IN-P	30.000002	3069.286386	0.371252	6.679026	0.397318	8.161292	0.027958
Aurora B	130	154	EKEGVEHQLRREIEIQSHLRHPNIL		3060.645000	IN-P	90.000008	3070.995450	0.678077	8.388090	0.692692	8.149535	0.030256
Aurora B	130	154	EKEGVEHQLRREIEIQSHLRHPNIL		3060.645000	IN-P	300.000000	3071.670036	0.455138	9.062677	0.476638	8.153311	0.028473
Aurora B	130	154	EKEGVEHQLRREIEIQSHLRHPNIL		3060.645000	IN-P	MAX	3078.143278	0.086424	15.535919	0.165838	8.188444	0.001415
Aurora B	132	142	EGVEHQLRREI		1365.723300	all-P(astr)	0.000000	1366.451306	0.014548	0.000000	0.000000	6.449154	0.006740
Aurora B	132	142	EGVEHQLRREI		1365.723300	all-P(astr)	3.000000	1368.073463	0.017954	1.622158	0.023108	6.359674	0.021100
Aurora B	132	142	EGVEHQLRREI		1365.723300	all-P(astr)	10.000000	1368.983979	0.000000	2.532673	0.014548	6.369085	0.000000
Aurora B	132	142	EGVEHQLRREI		1365.723300	all-P(astr)	30.000002	1369.730781	0.000000	3.279476	0.014548	6.377830	0.000000
Aurora B	132	142	EGVEHQLRREI		1365.723300	all-P(astr)	90.000008	1370.556896	0.172526	4.105590	0.173138	6.345376	0.013759
Aurora B	132	142	EGVEHQLRREI		1365.723300	all-P(astr)	300.000000	1371.488818	0.210891	5.037512	0.211392	6.344599	9.419893E-5
Aurora B	132	142	EGVEHQLRREI		1365.723300	all-P(astr)	MAX	1373.569633	0.097465	7.118328	0.098545	6.327293	0.001696
Aurora B	132	142	EGVEHQLRREI		1365.723300	no-P(astr)	0.000000	1366.302674	0.024575	0.000000	0.000000	6.423419	0.003706
Aurora B	132	142	EGVEHQLRREI		1365.723300	no-P(astr)	3.000000	1369.052859	0.158456	2.750185	0.160351	6.379429	0.001436
Aurora B	132	142	EGVEHQLRREI		1365.723300	no-P(astr)	10.000000	1369.889516	0.163611	3.586842	0.165447	6.368359	0.001095
Aurora B	132	142	EGVEHQLRREI		1365.723300	no-P(astr)	30.000002	1371.039412	0.042242	4.736738	0.048870	6.342494	0.012857
Aurora B	132	142	EGVEHQLRREI		1365.723300	no-P(astr)	90.000008	1372.215332	0.007414	5.912658	0.025669	6.337165	0.002731
Aurora B	132	142	EGVEHQLRREI		1365.723300	no-P(astr)	300.000000	1372.545472	0.050690	6.242798	0.056333	6.347582	0.011421
Aurora B	132	142	EGVEHQLRREI		1365.723300	no-P(astr)	MAX	1373.569633	0.097465	7.266959	0.100515	6.327293	0.001696
Aurora B	132	142	EGVEHQLRREI		1365.723300	loop-P	0.000000	1366.250314	0.044947	0.000000	0.000000	6.437523	0.012975
Aurora B	132	142	EGVEHQLRREI		1365.723300	loop-P	3.000000	1368.785959	0.014950	2.535644	0.047369	6.442574	0.018929
Aurora B	132	142	EGVEHQLRREI		1365.723300	loop-P	10.000000	1369.456813	0.155290	3.206499	0.161664	6.435506	0.023018
Aurora B	132	142	EGVEHQLRREI		1365.723300	loop-P	30.000002	1369.903364	0.093306	3.653049	0.103567	6.396047	0.009139
Aurora B	132	142	EGVEHQLRREI		1365.723300	loop-P	90.000008	1370.677309	0.458126	4.426995	0.460325	6.424623	0.024966
Aurora B	132	142	EGVEHQLRREI		1365.723300	loop-P	300.000000	1371.529661	0.580919	5.279346	0.582655	6.415799	0.022170
Aurora B	132	142	EGVEHQLRREI		1365.723300	loop-P	MAX	1373.542312	0.133642	7.291997	0.140998	6.406296	0.002021
Aurora B	132	142	EGVEHQLRREI		1365.723300	IN-P	0.000000	1366.386303	0.037089	0.000000	0.000000	6.441212	0.003596
Aurora B	132	142	EGVEHQLRREI		1365.723300	IN-P	3.000000	1368.774193	0.173654	2.387890	0.177571	6.431772	0.017449
Aurora B	132	142	EGVEHQLRREI		1365.723300	IN-P	10.000000	1369.600062	0.189738	3.213759	0.193329	6.434916	0.024431
Aurora B	132	142	EGVEHQLRREI		1365.723300	IN-P	30.000002	1370.562670	0.325008	4.176366	0.327117	6.419096	0.014955
Aurora B	132	142	EGVEHQLRREI		1365.723300	IN-P	90.000008	1371.484691	0.480143	5.098388	0.481573	6.412918	0.018389
Aurora B	132	142	EGVEHQLRREI		1365.723300	IN-P	300.000000	1371.877009	0.412571	5.490706	0.414235	6.419372	0.020166
Aurora B	132	142	EGVEHQLRREI		1365.723300	IN-P	MAX	1373.542312	0.133642	7.156009	0.138693	6.406296	0.002021
Aurora B	132	143	EGVEHQLRREIE		1494.765900	all-P(astr)	0.000000	1495.362377	0.075081	0.000000	0.000000	6.465001	0.007612
Aurora B	132	143	EGVEHQLRREIE		1494.765900	all-P(astr)	3.000000	1497.421958	0.082465	2.059582	0.111524	6.437694	0.027394
Aurora B	132	143	EGVEHQLRREIE		1494.765900	all-P(astr)	10.000000	1498.077511	0.105134	2.715134	0.129191	6.434281	0.018820
Aurora B	132	143	EGVEHQLRREIE		1494.765900	all-P(astr)	30.000002	1498.779157	0.061929	3.416781	0.097326	6.434400	0.025562
Aurora B	132	143	EGVEHQLRREIE		1494.765900	all-P(astr)	90.000008	1499.365748	0.054632	4.003371	0.092853	6.420118	0.016127
Aurora B	132	143	EGVEHQLRREIE		1494.765900	all-P(astr)	300.000000	1500.048247	0.237554	4.685871	0.249136	6.415336	0.020417
Aurora B	132	143	EGVEHQLRREIE		1494.765900	all-P(astr)	MAX	1501.932276	0.031488	6.569900	0.081416	6.417213	0.003283
Aurora B	132	143	EGVEHQLRREIE		1494.765900	no-P(astr)	0.000000	1495.406439	0.027740	0.000000	0.000000	6.456105	0.001760
Aurora B	132	143	EGVEHQLRREIE		1494.765900	no-P(astr)	3.000000	1498.203784	0.032125	2.797345	0.042444	6.440942	0.009088
Aurora B	132	143	EGVEHQLRREIE		1494.765900	no-P(astr)	10.000000	1499.074681	0.280593	3.668242	0.281961	6.431702	0.021517
Aurora B	132	143	EGVEHQLRREIE		1494.765900	no-P(astr)	30.000002	1500.189803	0.078694	4.783364	0.083440	6.412736	0.024790
Aurora B	132	143	EGVEHQLRREIE		1494.765900	no-P(astr)	90.000008	1500.862820	0.115148	5.456381	0.118442	6.413505	0.024287
Aurora B	132	143	EGVEHQLRREIE		1494.765900	no-P(astr)	300.000000	1500.961396	0.465649	5.554957	0.466474	6.416701	0.016316
Aurora B	132	143	EGVEHQLRREIE		1494.765900	no-P(astr)	MAX	1501.932276	0.031488	6.525837	0.041964	6.417213	0.003283
Aurora B	132	143	EGVEHQLRREIE		1494.765900	loop-P	0.000000	1495.476368	0.014339	0.000000	0.000000	6.447397	0.001654
Aurora B	132	143	EGVEHQLRREIE		1494.765900	loop-P	3.000000	1497.973062	0.154147	2.496695	0.154813	6.448461	0.017214
Aurora B	132	143	EGVEHQLRREIE		1494.765900	loop-P	10.000000	1498.586872	0.264685	3.110504	0.265073	6.439111	0.021704
Aurora B	132	143	EGVEHQLRREIE		1494.765900	loop-P	30.000002	1499.392927	0.221752	3.916559	0.222215	6.428255	0.018890
Aurora B	132	143	EGVEHQLRREIE		1494.765900	loop-P	90.000008	1500.017421	0.323169	4.541053	0.323487	6.426780	0.015722
Aurora B	132	143	EGVEHQLRREIE		1494.765900	loop-P	300.000000	1500.672040	0.265503	5.195672	0.265890	6.415738	0.017076
Aurora B	132	143	EGVEHQLRREIE		1494.765900	loop-P	MAX	1501.932276	0.031488	6.455909	0.034599	6.417213	0.003283
Aurora B	132	143	EGVEHQLRREIE		1494.765900	IN-P	0.000000	1495.549252	0.004386	0.000000	0.000000	6.448696	0.003472
Aurora B	132	143	EGVEHQLRREIE		1494.765900	IN-P	3.000000	1497.865048	0.166884	2.315796	0.166942	6.433734	0.021410
Aurora B	132	143	EGVEHQLRREIE		1494.765900	IN-P	10.000000	1498.765129	0.190094	3.215876	0.190145	6.432743	0.021513
Aurora B	132	143	EGVEHQLRREIE		1494.765900	IN-P	30.000002	1499.618820	0.364003	4.069568	0.364029	6.419139	0.015902
Aurora B	132	143	EGVEHQLRREIE		1494.765900	IN-P	90.000008	1500.493072	0.630920	4.943820	0.630936	6.411530	0.017053
Aurora B	132	143	EGVEHQLRREIE		1494.765900	IN-P	300.000000	1500.810593	0.394016	5.261341	0.394041	6.416055	0.019249
Aurora B	132	143	EGVEHQLRREIE		1494.765900	IN-P	MAX	1501.932276	0.031488	6.383024	0.031792	6.417213	0.003283
Aurora B	138	143	LRREIE		815.473400	all-P(astr)	0.000000	815.830446	0.038381	0.000000	0.000000	5.400366	0.003283
Aurora B	138	143	LRREIE		815.473400	all-P(astr)	3.000000	816.483027	0.024445	0.652581	0.045504	5.388112	0.009254
Aurora B	138	143	LRREIE		815.473400	all-P(astr)	10.000000	816.646664	0.009035	0.816219	0.039430	5.387044	0.005698
Aurora B	138	143	LRREIE		815.473400	all-P(astr)	30.000002	816.953591	0.036053	1.123145	0.052658	5.390805	0.008481
Aurora B	138	143	LRREIE		815.473400	all-P(astr)	90.000008	817.311092	0.037796	1.480646	0.053866	5.384123	0.000293
Aurora B	138	143	LRREIE		815.473400	all-P(astr)	300.000000	817.823041	0.078715	1.992595	0.087573	5.380810	0.002425
Aurora B	138	143	LRREIE		815.473400	all-P(astr)	MAX	819.172240	0.058586	3.341794	0.070038	5.360583	0.003725
Aurora B	138	143	LRREIE		815.473400	no-P(astr)	0.000000	815.841585	0.019077	0.000000	0.000000	5.391433	0.006180
Aurora B	138	143	LRREIE		815.473400	no-P(astr)	3.000000	816.621290	0.006898	0.779705	0.020286	5.387082	0.003798
Aurora B	138	143	LRREIE		815.473400	no-P(astr)	10.000000	816.921357	0.026853	1.079772	0.032940	5.390853	0.006086
Aurora B	138	143	LRREIE		815.473400	no-P(astr)	30.000002	817.522388	0.068067	1.680803	0.070690	5.388343	0.007037
Aurora B	138	143	LRREIE		815.473400	no-P(astr)	90.000008	818.337179	0.030549	2.495594	0.036016	5.381146	0.006572
Aurora B	138	143	LRREIE		815.473400	no-P(astr)	300.000000	818.750542	0.145328	2.908958	0.146575	5.385762	0.002655
Aurora B	138	143	LRREIE		815.473400	no-P(astr)	MAX	819.172240	0.058586	3.330655	0.061613	5.360583	0.003725
Aurora B	138	143	LRREIE		815.473400	loop-P	0.000000	815.869305	0.021951	0.000000	0.000000	5.398313	0.002333
Aurora B	138	143	LRREIE		815.473400	loop-P	3.000000	816.427872	0.080824	0.558568	0.083752	5.390373	0.006301
Aurora B	138	143	LRREIE		815.473400	loop-P	10.000000	816.548080	0.021709	0.678775	0.030873	5.388891	0.008681
Aurora B	138	143	LRREIE		815.473400	loop-P	30.000002	816.807775	0.006168	0.938471	0.022801	5.382943	0.004794
Aurora B	138	143	LRREIE		815.473400	loop-P	90.000008	817.305712	0.019502	1.436408	0.029363	5.385746	0.002288
Aurora B	138	143	LRREIE		815.473400	loop-P	300.000000	818.068391	0.025188	2.199086	0.033411	5.379769	0.000158
Aurora B	138	143	LRREIE		815.473400	loop-P	MAX	819.172240	0.058586	3.302935	0.062563	5.360583	0.003725
Aurora B	138	143	LRREIE		815.473400	IN-P	0.000000	815.975153	0.016425	0.000000	0.000000	5.402228	0.002768
Aurora B	138	143	LRREIE		815.473400	IN-P	3.000000	816.532578	0.046838	0.557425	0.049635	5.381078	0.002595
Aurora B	138	143	LRREIE		815.473400	IN-P	10.000000	816.810915	0.036583	0.835762	0.040101	5.389493	0.011237
Aurora B	138	143	LRREIE		815.473400	IN-P	30.000002	817.229667	0.038087	1.254514	0.041478	5.380366	0.000824
Aurora B	138	143	LRREIE		815.473400	IN-P	90.000008	817.895543	0.153166	1.920390	0.154044	5.383140	0.000100
Aurora B	138	143	LRREIE		815.473400	IN-P	300.000000	818.299423	0.036478	2.324270	0.040005	5.385411	0.001199
Aurora B	138	143	LRREIE		815.473400	IN-P	MAX	819.172240	0.058586	3.197087	0.060845	5.360583	0.003725
Aurora B	142	156	IEIQSHLRHPNILRM		1857.027600	all-P(astr)	0.000000	1858.119374	0.095618	0.000000	0.000000	8.000910	0.005993
Aurora B	142	156	IEIQSHLRHPNILRM		1857.027600	all-P(astr)	3.000000	1859.386445	0.067410	1.267071	0.116991	7.986806	0.031596
Aurora B	142	156	IEIQSHLRHPNILRM		1857.027600	all-P(astr)	10.000000	1859.752344	0.089487	1.632970	0.130961	7.989354	0.025356
Aurora B	142	156	IEIQSHLRHPNILRM		1857.027600	all-P(astr)	30.000002	1860.282445	0.053433	2.163071	0.109535	8.000647	0.031181
Aurora B	142	156	IEIQSHLRHPNILRM		1857.027600	all-P(astr)	90.000008	1860.828067	0.116257	2.708693	0.150527	7.990295	0.022413
Aurora B	142	156	IEIQSHLRHPNILRM		1857.027600	all-P(astr)	300.000000	1861.545626	0.123883	3.426252	0.156493	7.987990	0.026350
Aurora B	142	156	IEIQSHLRHPNILRM		1857.027600	all-P(astr)	MAX	1866.661858	0.059148	8.542484	0.112434	8.001616	0.002168
Aurora B	142	156	IEIQSHLRHPNILRM		1857.027600	no-P(astr)	0.000000	1858.092372	0.096187	0.000000	0.000000	7.990705	0.003612
Aurora B	142	156	IEIQSHLRHPNILRM		1857.027600	no-P(astr)	3.000000	1859.731816	0.085212	1.639443	0.128503	8.000900	0.011359
Aurora B	142	156	IEIQSHLRHPNILRM		1857.027600	no-P(astr)	10.000000	1860.239951	0.046309	2.147579	0.106755	7.996241	0.027518
Aurora B	142	156	IEIQSHLRHPNILRM		1857.027600	no-P(astr)	30.000002	1861.025112	0.092279	2.932740	0.133294	7.990217	0.024368
Aurora B	142	156	IEIQSHLRHPNILRM		1857.027600	no-P(astr)	90.000008	1861.786221	0.087381	3.693849	0.129952	7.990696	0.026213
Aurora B	142	156	IEIQSHLRHPNILRM		1857.027600	no-P(astr)	300.000000	1862.386355	0.260500	4.293983	0.277691	7.990849	0.022755
Aurora B	142	156	IEIQSHLRHPNILRM		1857.027600	no-P(astr)	MAX	1866.661858	0.059148	8.569486	0.112918	8.001616	0.002168
Aurora B	142	156	IEIQSHLRHPNILRM		1857.027600	loop-P	0.000000	1858.143965	0.043781	0.000000	0.000000	7.978430	0.003119
Aurora B	142	156	IEIQSHLRHPNILRM		1857.027600	loop-P	3.000000	1859.421989	0.067638	1.278025	0.080571	8.000998	0.026916
Aurora B	142	156	IEIQSHLRHPNILRM		1857.027600	loop-P	10.000000	1859.828423	0.137716	1.684458	0.144508	7.993298	0.030087
Aurora B	142	156	IEIQSHLRHPNILRM		1857.027600	loop-P	30.000002	1860.387568	0.047861	2.243604	0.064864	7.989893	0.023542
Aurora B	142	156	IEIQSHLRHPNILRM		1857.027600	loop-P	90.000008	1860.922937	0.090350	2.778973	0.100398	7.996461	0.026566
Aurora B	142	156	IEIQSHLRHPNILRM		1857.027600	loop-P	300.000000	1861.832362	0.094125	3.688397	0.103809	7.986871	0.022548
Aurora B	142	156	IEIQSHLRHPNILRM		1857.027600	loop-P	MAX	1866.661858	0.059148	8.517893	0.073588	8.001616	0.002168
Aurora B	142	156	IEIQSHLRHPNILRM		1857.027600	IN-P	0.000000	1858.276652	0.119199	0.000000	0.000000	7.978904	0.003868
Aurora B	142	156	IEIQSHLRHPNILRM		1857.027600	IN-P	3.000000	1859.584137	0.112199	1.307485	0.163698	7.985793	0.023182
Aurora B	142	156	IEIQSHLRHPNILRM		1857.027600	IN-P	10.000000	1860.029905	0.093723	1.753253	0.151632	7.989407	0.027344
Aurora B	142	156	IEIQSHLRHPNILRM		1857.027600	IN-P	30.000002	1860.619890	0.064214	2.343238	0.135395	7.987686	0.023875
Aurora B	142	156	IEIQSHLRHPNILRM		1857.027600	IN-P	90.000008	1861.359020	0.175719	3.082368	0.212333	7.983405	0.024546
Aurora B	142	156	IEIQSHLRHPNILRM		1857.027600	IN-P	300.000000	1861.811172	0.034827	3.534520	0.124182	7.986922	0.021529
Aurora B	142	156	IEIQSHLRHPNILRM		1857.027600	IN-P	MAX	1866.661858	0.059148	8.385206	0.133067	8.001616	0.002168
Aurora B	144	153	IQSHLRHPNI		1214.675300	all-P(astr)	0.000000	1215.352881	0.005217	0.000000	0.000000	6.442112	0.006038
Aurora B	144	153	IQSHLRHPNI		1214.675300	all-P(astr)	3.000000	1216.510037	0.040897	1.157156	0.041228	6.438979	0.023041
Aurora B	144	153	IQSHLRHPNI		1214.675300	all-P(astr)	10.000000	1216.788134	0.038434	1.435253	0.038786	6.436442	0.015569
Aurora B	144	153	IQSHLRHPNI		1214.675300	all-P(astr)	30.000002	1217.198359	0.087844	1.845478	0.087999	6.443596	0.018114
Aurora B	144	153	IQSHLRHPNI		1214.675300	all-P(astr)	90.000008	1217.546012	0.138559	2.193132	0.138657	6.431962	0.009816
Aurora B	144	153	IQSHLRHPNI		1214.675300	all-P(astr)	300.000000	1217.795178	0.316788	2.442297	0.316831	6.432229	0.016862
Aurora B	144	153	IQSHLRHPNI		1214.675300	all-P(astr)	MAX	1219.072596	0.194879	3.719715	0.194949	6.426327	0.002482
Aurora B	144	153	IQSHLRHPNI		1214.675300	no-P(astr)	0.000000	1215.327198	0.011843	0.000000	0.000000	6.434404	0.001524
Aurora B	144	153	IQSHLRHPNI		1214.675300	no-P(astr)	3.000000	1216.735118	0.010112	1.407919	0.015573	6.440183	0.011370
Aurora B	144	153	IQSHLRHPNI		1214.675300	no-P(astr)	10.000000	1217.139105	0.057697	1.811907	0.058900	6.442403	0.015575
Aurora B	144	153	IQSHLRHPNI		1214.675300	no-P(astr)	30.000002	1217.533817	0.076388	2.206619	0.077301	6.437364	0.017861
Aurora B	144	153	IQSHLRHPNI		1214.675300	no-P(astr)	90.000008	1217.803761	0.103624	2.476563	0.104299	6.434244	0.018628
Aurora B	144	153	IQSHLRHPNI		1214.675300	no-P(astr)	300.000000	1217.819110	0.333758	2.491912	0.333969	6.436433	0.015003
Aurora B	144	153	IQSHLRHPNI		1214.675300	no-P(astr)	MAX	1219.072596	0.194879	3.745398	0.195239	6.426327	0.002482
Aurora B	144	153	IQSHLRHPNI		1214.675300	loop-P	0.000000	1215.350005	0.045001	0.000000	0.000000	6.427494	0.002321
Aurora B	144	153	IQSHLRHPNI		1214.675300	loop-P	3.000000	1216.568426	0.068699	1.218422	0.082126	6.436247	0.013603
Aurora B	144	153	IQSHLRHPNI		1214.675300	loop-P	10.000000	1216.826266	0.091367	1.476262	0.101848	6.435021	0.020230
Aurora B	144	153	IQSHLRHPNI		1214.675300	loop-P	30.000002	1217.308610	0.089800	1.958606	0.100445	6.434136	0.013282
Aurora B	144	153	IQSHLRHPNI		1214.675300	loop-P	90.000008	1217.647783	0.128144	2.297779	0.135816	6.437900	0.015615
Aurora B	144	153	IQSHLRHPNI		1214.675300	loop-P	300.000000	1217.856155	0.171005	2.506150	0.176827	6.431850	0.011199
Aurora B	144	153	IQSHLRHPNI		1214.675300	loop-P	MAX	1219.072596	0.194879	3.722591	0.200007	6.426327	0.002482
Aurora B	144	153	IQSHLRHPNI		1214.675300	IN-P	0.000000	1215.456400	0.057480	0.000000	0.000000	6.430508	0.003743
Aurora B	144	153	IQSHLRHPNI		1214.675300	IN-P	3.000000	1216.619993	0.057109	1.163593	0.081027	6.430422	0.014151
Aurora B	144	153	IQSHLRHPNI		1214.675300	IN-P	10.000000	1216.979096	0.072746	1.522696	0.092714	6.433601	0.018298
Aurora B	144	153	IQSHLRHPNI		1214.675300	IN-P	30.000002	1217.447423	0.092306	1.991023	0.108740	6.430753	0.012493
Aurora B	144	153	IQSHLRHPNI		1214.675300	IN-P	90.000008	1217.779912	0.163590	2.323512	0.173395	6.428872	0.015720
Aurora B	144	153	IQSHLRHPNI		1214.675300	IN-P	300.000000	1217.886518	0.146975	2.430118	0.157815	6.429716	0.012961
Aurora B	144	153	IQSHLRHPNI		1214.675300	IN-P	MAX	1219.072596	0.194879	3.616196	0.203179	6.426327	0.002482
Aurora B	144	154	IQSHLRHPNIL		1327.759300	all-P(astr)	0.000000	1328.538471	0.062303	0.000000	0.000000	7.339215	0.004376
Aurora B	144	154	IQSHLRHPNIL		1327.759300	all-P(astr)	3.000000	1329.612961	0.048321	1.074490	0.078845	7.319555	0.023479
Aurora B	144	154	IQSHLRHPNIL		1327.759300	all-P(astr)	10.000000	1329.926578	0.080883	1.388107	0.102097	7.324003	0.016762
Aurora B	144	154	IQSHLRHPNIL		1327.759300	all-P(astr)	30.000002	1330.247808	0.041779	1.709336	0.075014	7.331008	0.022587
Aurora B	144	154	IQSHLRHPNIL		1327.759300	all-P(astr)	90.000008	1330.560646	0.051092	2.022175	0.080573	7.320436	0.012664
Aurora B	144	154	IQSHLRHPNIL		1327.759300	all-P(astr)	300.000000	1330.791692	0.092491	2.253221	0.111518	7.321392	0.017550
Aurora B	144	154	IQSHLRHPNIL		1327.759300	all-P(astr)	MAX	1332.753085	0.037980	4.214614	0.072967	7.313718	0.002354
Aurora B	144	154	IQSHLRHPNIL		1327.759300	no-P(astr)	0.000000	1328.589122	0.085474	0.000000	0.000000	7.333710	0.002863
Aurora B	144	154	IQSHLRHPNIL		1327.759300	no-P(astr)	3.000000	1329.824106	0.064771	1.234984	0.107243	7.325722	0.008886
Aurora B	144	154	IQSHLRHPNIL		1327.759300	no-P(astr)	10.000000	1330.199156	0.037671	1.610035	0.093407	7.329294	0.017905
Aurora B	144	154	IQSHLRHPNIL		1327.759300	no-P(astr)	30.000002	1330.590227	0.047014	2.001105	0.097550	7.323425	0.019987
Aurora B	144	154	IQSHLRHPNIL		1327.759300	no-P(astr)	90.000008	1330.838288	0.070888	2.249166	0.111045	7.324118	0.017189
Aurora B	144	154	IQSHLRHPNIL		1327.759300	no-P(astr)	300.000000	1330.872050	0.149127	2.282928	0.171885	7.321897	0.014482
Aurora B	144	154	IQSHLRHPNIL		1327.759300	no-P(astr)	MAX	1332.753085	0.037980	4.163963	0.093532	7.313718	0.002354
Aurora B	144	154	IQSHLRHPNIL		1327.759300	loop-P	0.000000	1328.604339	0.082018	0.000000	0.000000	7.319617	0.003115
Aurora B	144	154	IQSHLRHPNIL		1327.759300	loop-P	3.000000	1329.649645	0.043103	1.045306	0.092654	7.326307	0.015467
Aurora B	144	154	IQSHLRHPNIL		1327.759300	loop-P	10.000000	1329.921444	0.104337	1.317104	0.132714	7.323602	0.021577
Aurora B	144	154	IQSHLRHPNIL		1327.759300	loop-P	30.000002	1330.325176	0.067744	1.720836	0.106377	7.320462	0.015064
Aurora B	144	154	IQSHLRHPNIL		1327.759300	loop-P	90.000008	1330.653025	0.090700	2.048685	0.122284	7.327345	0.016567
Aurora B	144	154	IQSHLRHPNIL		1327.759300	loop-P	300.000000	1330.785636	0.079607	2.181296	0.114298	7.320391	0.014902
Aurora B	144	154	IQSHLRHPNIL		1327.759300	loop-P	MAX	1332.753085	0.037980	4.148746	0.090385	7.313718	0.002354
Aurora B	144	154	IQSHLRHPNIL		1327.759300	IN-P	0.000000	1328.725112	0.108824	0.000000	0.000000	7.323664	0.004776
Aurora B	144	154	IQSHLRHPNIL		1327.759300	IN-P	3.000000	1329.767325	0.109713	1.042212	0.154530	7.316262	0.014367
Aurora B	144	154	IQSHLRHPNIL		1327.759300	IN-P	10.000000	1330.067202	0.066058	1.342090	0.127304	7.321210	0.019311
Aurora B	144	154	IQSHLRHPNIL		1327.759300	IN-P	30.000002	1330.446403	0.081951	1.721291	0.136230	7.316322	0.012258
Aurora B	144	154	IQSHLRHPNIL		1327.759300	IN-P	90.000008	1330.740076	0.082959	2.014964	0.136839	7.316850	0.015649
Aurora B	144	154	IQSHLRHPNIL		1327.759300	IN-P	300.000000	1330.810931	0.050299	2.085818	0.119886	7.318785	0.013018
Aurora B	144	154	IQSHLRHPNIL		1327.759300	IN-P	MAX	1332.753085	0.037980	4.027973	0.115261	7.313718	0.002354
Aurora B	144	156	IQSHLRHPNILRM		1614.900900	all-P(astr)	0.000000	1616.173066	0.157556	0.000000	0.000000	7.607804	0.004015
Aurora B	144	156	IQSHLRHPNILRM		1614.900900	all-P(astr)	3.000000	1617.193463	0.109401	1.020397	0.191814	7.593760	0.024478
Aurora B	144	156	IQSHLRHPNILRM		1614.900900	all-P(astr)	10.000000	1617.450744	0.122346	1.277678	0.199481	7.595008	0.019863
Aurora B	144	156	IQSHLRHPNILRM		1614.900900	all-P(astr)	30.000002	1617.798073	0.116427	1.625008	0.195906	7.600415	0.022343
Aurora B	144	156	IQSHLRHPNILRM		1614.900900	all-P(astr)	90.000008	1618.106400	0.122081	1.933334	0.199319	7.590570	0.014382
Aurora B	144	156	IQSHLRHPNILRM		1614.900900	all-P(astr)	300.000000	1618.520010	0.098322	2.346944	0.185718	7.589854	0.016852
Aurora B	144	156	IQSHLRHPNILRM		1614.900900	all-P(astr)	MAX	1622.090352	0.058138	5.917286	0.167941	7.591866	0.000609
Aurora B	144	156	IQSHLRHPNILRM		1614.900900	no-P(astr)	0.000000	1616.163042	0.167584	0.000000	0.000000	7.604469	0.003192
Aurora B	144	156	IQSHLRHPNILRM		1614.900900	no-P(astr)	3.000000	1617.371978	0.112243	1.208936	0.201700	7.603349	0.008876
Aurora B	144	156	IQSHLRHPNILRM		1614.900900	no-P(astr)	10.000000	1617.703150	0.092627	1.540108	0.191479	7.599367	0.020662
Aurora B	144	156	IQSHLRHPNILRM		1614.900900	no-P(astr)	30.000002	1618.133411	0.073034	1.970369	0.182807	7.597858	0.021768
Aurora B	144	156	IQSHLRHPNILRM		1614.900900	no-P(astr)	90.000008	1618.504074	0.095877	2.341032	0.193072	7.593752	0.021493
Aurora B	144	156	IQSHLRHPNILRM		1614.900900	no-P(astr)	300.000000	1618.804622	0.161566	2.641579	0.232783	7.595300	0.019533
Aurora B	144	156	IQSHLRHPNILRM		1614.900900	no-P(astr)	MAX	1622.090352	0.058138	5.927309	0.177383	7.591866	0.000609
Aurora B	144	156	IQSHLRHPNILRM		1614.900900	loop-P	0.000000	1616.184253	0.166683	0.000000	0.000000	7.585563	0.003192
Aurora B	144	156	IQSHLRHPNILRM		1614.900900	loop-P	3.000000	1617.219772	0.166508	1.035519	0.235602	7.594417	0.018971
Aurora B	144	156	IQSHLRHPNILRM		1614.900900	loop-P	10.000000	1617.306971	0.181386	1.122718	0.246342	7.570275	0.014087
Aurora B	144	156	IQSHLRHPNILRM		1614.900900	loop-P	30.000002	1617.867859	0.105173	1.683606	0.197090	7.587571	0.019604
Aurora B	144	156	IQSHLRHPNILRM		1614.900900	loop-P	90.000008	1618.197980	0.099910	2.013727	0.194333	7.591184	0.017547
Aurora B	144	156	IQSHLRHPNILRM		1614.900900	loop-P	300.000000	1618.644523	0.073894	2.460269	0.182329	7.588645	0.014735
Aurora B	144	156	IQSHLRHPNILRM		1614.900900	loop-P	MAX	1622.090352	0.058138	5.906099	0.176532	7.591866	0.000609
Aurora B	144	156	IQSHLRHPNILRM		1614.900900	IN-P	0.000000	1616.289294	0.151069	0.000000	0.000000	7.591169	0.004281
Aurora B	144	156	IQSHLRHPNILRM		1614.900900	IN-P	3.000000	1617.310486	0.098926	1.021192	0.180578	7.589003	0.019125
Aurora B	144	156	IQSHLRHPNILRM		1614.900900	IN-P	10.000000	1617.593919	0.110080	1.304625	0.186921	7.591560	0.020053
Aurora B	144	156	IQSHLRHPNILRM		1614.900900	IN-P	30.000002	1617.964933	0.065498	1.675639	0.164657	7.592714	0.022620
Aurora B	144	156	IQSHLRHPNILRM		1614.900900	IN-P	90.000008	1618.357755	0.068531	2.068461	0.165887	7.590887	0.013508
Aurora B	144	156	IQSHLRHPNILRM		1614.900900	IN-P	300.000000	1618.621447	0.042418	2.332153	0.156912	7.590559	0.014704
Aurora B	144	156	IQSHLRHPNILRM		1614.900900	IN-P	MAX	1622.090352	0.058138	5.801058	0.161870	7.591866	0.000609
Aurora B	155	168	RMYNYFHDRKRIYL		1975.011900	all-P(astr)	0.000000	1976.005246	0.089390	0.000000	0.000000	8.228380	0.003368
Aurora B	155	168	RMYNYFHDRKRIYL		1975.011900	all-P(astr)	3.000000	1977.302196	0.030142	1.296950	0.094335	8.186399	0.024109
Aurora B	155	168	RMYNYFHDRKRIYL		1975.011900	all-P(astr)	10.000000	1977.392474	0.050594	1.387228	0.102715	8.186406	0.015612
Aurora B	155	168	RMYNYFHDRKRIYL		1975.011900	all-P(astr)	30.000002	1977.561222	0.056868	1.555976	0.105946	8.198688	0.021702
Aurora B	155	168	RMYNYFHDRKRIYL		1975.011900	all-P(astr)	90.000008	1977.864750	0.029607	1.859504	0.094166	8.184126	0.015271
Aurora B	155	168	RMYNYFHDRKRIYL		1975.011900	all-P(astr)	300.000000	1978.186768	0.103819	2.181522	0.137000	8.184653	0.015792
Aurora B	155	168	RMYNYFHDRKRIYL		1975.011900	all-P(astr)	MAX	1984.000708	0.100594	7.995462	0.134572	8.206809	0.002111
Aurora B	155	168	RMYNYFHDRKRIYL		1975.011900	no-P(astr)	0.000000	1976.063483	0.159679	0.000000	0.000000	8.211163	0.005591
Aurora B	155	168	RMYNYFHDRKRIYL		1975.011900	no-P(astr)	3.000000	1977.388807	0.046696	1.325324	0.166367	8.203450	0.003283
Aurora B	155	168	RMYNYFHDRKRIYL		1975.011900	no-P(astr)	10.000000	1977.480350	0.035693	1.416868	0.163620	8.192631	0.019645
Aurora B	155	168	RMYNYFHDRKRIYL		1975.011900	no-P(astr)	30.000002	1977.785737	0.084403	1.722254	0.180614	8.187809	0.022830
Aurora B	155	168	RMYNYFHDRKRIYL		1975.011900	no-P(astr)	90.000008	1978.323555	0.138018	2.260072	0.211060	8.184473	0.020298
Aurora B	155	168	RMYNYFHDRKRIYL		1975.011900	no-P(astr)	300.000000	1978.508615	0.137211	2.445132	0.210533	8.191573	0.011015
Aurora B	155	168	RMYNYFHDRKRIYL		1975.011900	no-P(astr)	MAX	1984.000708	0.100594	7.937225	0.188723	8.206809	0.002111
Aurora B	155	168	RMYNYFHDRKRIYL		1975.011900	loop-P	0.000000	1976.097564	0.077586	0.000000	0.000000	8.193727	0.005513
Aurora B	155	168	RMYNYFHDRKRIYL		1975.011900	loop-P	3.000000	1977.366872	0.035888	1.269309	0.085484	8.199356	0.016593
Aurora B	155	168	RMYNYFHDRKRIYL		1975.011900	loop-P	10.000000	1977.454323	0.065058	1.356760	0.101253	8.194217	0.023972
Aurora B	155	168	RMYNYFHDRKRIYL		1975.011900	loop-P	30.000002	1977.618739	0.069932	1.521176	0.104451	8.188986	0.012655
Aurora B	155	168	RMYNYFHDRKRIYL		1975.011900	loop-P	90.000008	1978.027341	0.030157	1.929778	0.083240	8.192660	0.017676
Aurora B	155	168	RMYNYFHDRKRIYL		1975.011900	loop-P	300.000000	1978.522109	0.084330	2.424545	0.114591	8.185752	0.014778
Aurora B	155	168	RMYNYFHDRKRIYL		1975.011900	loop-P	MAX	1984.000708	0.100594	7.903144	0.127038	8.206809	0.002111
Aurora B	155	168	RMYNYFHDRKRIYL		1975.011900	IN-P	0.000000	1976.254779	0.032033	0.000000	0.000000	8.179371	0.003457
Aurora B	155	168	RMYNYFHDRKRIYL		1975.011900	IN-P	3.000000	1977.358595	0.058380	1.103815	0.066591	8.175561	0.021704
Aurora B	155	168	RMYNYFHDRKRIYL		1975.011900	IN-P	10.000000	1977.440644	0.050206	1.185865	0.059555	8.183597	0.022156
Aurora B	155	168	RMYNYFHDRKRIYL		1975.011900	IN-P	30.000002	1977.639436	0.067197	1.384657	0.074441	8.175528	0.016748
Aurora B	155	168	RMYNYFHDRKRIYL		1975.011900	IN-P	90.000008	1977.988810	0.065055	1.734030	0.072514	8.170580	0.020695
Aurora B	155	168	RMYNYFHDRKRIYL		1975.011900	IN-P	300.000000	1978.241650	0.045240	1.986871	0.055432	8.175813	0.016351
Aurora B	155	168	RMYNYFHDRKRIYL		1975.011900	IN-P	MAX	1984.000708	0.100594	7.745929	0.105571	8.206809	0.002111
Aurora B	157	160	YNYF		606.255800	all-P(astr)	0.000000	606.497051	0.019864	0.000000	0.000000	9.303179	0.000269
Aurora B	157	160	YNYF		606.255800	all-P(astr)	3.000000	606.644793	0.007669	0.147742	0.021293	9.328948	0.055120
Aurora B	157	160	YNYF		606.255800	all-P(astr)	10.000000	606.650178	0.017786	0.153127	0.026663	9.334997	0.046476
Aurora B	157	160	YNYF		606.255800	all-P(astr)	30.000002	606.668109	0.000000	0.171057	0.019864	9.279538	0.000000
Aurora B	157	160	YNYF		606.255800	all-P(astr)	90.000008	606.765397	0.022885	0.268346	0.030303	9.336691	0.043149
Aurora B	157	160	YNYF		606.255800	all-P(astr)	300.000000	606.917080	0.050205	0.420029	0.053992	9.340477	0.044812
Aurora B	157	160	YNYF		606.255800	all-P(astr)	MAX	608.213897	0.011899	1.716846	0.023155	9.387325	0.007094
Aurora B	157	160	YNYF		606.255800	no-P(astr)	0.000000	606.536347	0.050666	0.000000	0.000000	9.295248	0.003811
Aurora B	157	160	YNYF		606.255800	no-P(astr)	3.000000	606.638196	0.032400	0.101849	0.060139	9.357861	0.023199
Aurora B	157	160	YNYF		606.255800	no-P(astr)	10.000000	606.662990	0.011276	0.126644	0.051905	9.342577	0.046942
Aurora B	157	160	YNYF		606.255800	no-P(astr)	30.000002	606.830949	0.042639	0.294603	0.066220	9.339823	0.051440
Aurora B	157	160	YNYF		606.255800	no-P(astr)	90.000008	607.048664	0.015551	0.512318	0.052998	9.342193	0.049375
Aurora B	157	160	YNYF		606.255800	no-P(astr)	300.000000	607.238132	0.030331	0.701786	0.059050	9.344789	0.041616
Aurora B	157	160	YNYF		606.255800	no-P(astr)	MAX	608.213897	0.011899	1.677551	0.052044	9.387325	0.007094
Aurora B	157	160	YNYF		606.255800	loop-P	0.000000	606.571659	0.031571	0.000000	0.000000	9.292695	0.003568
Aurora B	157	160	YNYF		606.255800	loop-P	3.000000	606.600107	0.002673	0.028448	0.031684	9.353606	0.047936
Aurora B	157	160	YNYF		606.255800	loop-P	10.000000	606.630752	0.009118	0.059093	0.032862	9.346267	0.056281
Aurora B	157	160	YNYF		606.255800	loop-P	30.000002	606.738070	0.003728	0.166411	0.031791	9.342023	0.041266
Aurora B	157	160	YNYF		606.255800	loop-P	90.000008	606.924967	0.036782	0.353308	0.048474	9.346080	0.044695
Aurora B	157	160	YNYF		606.255800	loop-P	300.000000	607.221444	0.014623	0.649784	0.034793	9.340404	0.041482
Aurora B	157	160	YNYF		606.255800	loop-P	MAX	608.213897	0.011899	1.642238	0.033739	9.387325	0.007094
Aurora B	157	160	YNYF		606.255800	IN-P	0.000000	606.547941	0.005335	0.000000	0.000000	9.295582	0.003728
Aurora B	157	160	YNYF		606.255800	IN-P	3.000000	606.667327	0.006290	0.119387	0.008248	9.339211	0.046785
Aurora B	157	160	YNYF		606.255800	IN-P	10.000000	606.647096	0.012392	0.099155	0.013492	9.342214	0.050100
Aurora B	157	160	YNYF		606.255800	IN-P	30.000002	606.756617	0.012828	0.208677	0.013893	9.341246	0.042771
Aurora B	157	160	YNYF		606.255800	IN-P	90.000008	606.871219	0.062127	0.323278	0.062356	9.332145	0.044935
Aurora B	157	160	YNYF		606.255800	IN-P	300.000000	607.005377	0.010865	0.457437	0.012104	9.342122	0.042683
Aurora B	157	160	YNYF		606.255800	IN-P	MAX	608.213897	0.011899	1.665957	0.013040	9.387325	0.007094
Aurora B	157	167	YNYFHDRKRIY		1574.786300	all-P(astr)	0.000000	1575.972892	0.164596	0.000000	0.000000	7.255306	0.003806
Aurora B	157	167	YNYFHDRKRIY		1574.786300	all-P(astr)	3.000000	1577.116200	0.125118	1.143308	0.206752	7.242803	0.028542
Aurora B	157	167	YNYFHDRKRIY		1574.786300	all-P(astr)	10.000000	1577.227619	0.170465	1.254728	0.236960	7.237676	0.018998
Aurora B	157	167	YNYFHDRKRIY		1574.786300	all-P(astr)	30.000002	1577.393654	0.189292	1.420762	0.250845	7.245030	0.023588
Aurora B	157	167	YNYFHDRKRIY		1574.786300	all-P(astr)	90.000008	1577.611580	0.137631	1.638688	0.214555	7.235357	0.016782
Aurora B	157	167	YNYFHDRKRIY		1574.786300	all-P(astr)	300.000000	1577.877619	0.105485	1.904727	0.195496	7.237838	0.019847
Aurora B	157	167	YNYFHDRKRIY		1574.786300	all-P(astr)	MAX	1580.940442	0.152325	4.967550	0.224265	7.236322	0.004143
Aurora B	157	167	YNYFHDRKRIY		1574.786300	no-P(astr)	0.000000	1575.909225	0.120894	0.000000	0.000000	7.243742	0.003633
Aurora B	157	167	YNYFHDRKRIY		1574.786300	no-P(astr)	3.000000	1577.174044	0.141343	1.264819	0.185992	7.252416	0.006004
Aurora B	157	167	YNYFHDRKRIY		1574.786300	no-P(astr)	10.000000	1577.275183	0.159801	1.365958	0.200379	7.244985	0.017809
Aurora B	157	167	YNYFHDRKRIY		1574.786300	no-P(astr)	30.000002	1577.557923	0.145350	1.648698	0.189056	7.236936	0.021360
Aurora B	157	167	YNYFHDRKRIY		1574.786300	no-P(astr)	90.000008	1577.947982	0.124881	2.038758	0.173812	7.238191	0.021082
Aurora B	157	167	YNYFHDRKRIY		1574.786300	no-P(astr)	300.000000	1578.119648	0.133257	2.210423	0.179924	7.244898	0.013239
Aurora B	157	167	YNYFHDRKRIY		1574.786300	no-P(astr)	MAX	1580.940442	0.152325	5.031217	0.194469	7.236322	0.004143
Aurora B	157	167	YNYFHDRKRIY		1574.786300	loop-P	0.000000	1575.998788	0.183268	0.000000	0.000000	7.237703	0.002409
Aurora B	157	167	YNYFHDRKRIY		1574.786300	loop-P	3.000000	1577.082397	0.122430	1.083609	0.220400	7.246968	0.019930
Aurora B	157	167	YNYFHDRKRIY		1574.786300	loop-P	10.000000	1577.199275	0.125840	1.200488	0.222312	7.242842	0.026881
Aurora B	157	167	YNYFHDRKRIY		1574.786300	loop-P	30.000002	1577.433590	0.135722	1.434803	0.228051	7.238336	0.016015
Aurora B	157	167	YNYFHDRKRIY		1574.786300	loop-P	90.000008	1577.746306	0.115348	1.747519	0.216546	7.243163	0.019506
Aurora B	157	167	YNYFHDRKRIY		1574.786300	loop-P	300.000000	1578.059419	0.064001	2.060632	0.194122	7.238545	0.016157
Aurora B	157	167	YNYFHDRKRIY		1574.786300	loop-P	MAX	1580.940442	0.152325	4.941655	0.238306	7.236322	0.004143
Aurora B	157	167	YNYFHDRKRIY		1574.786300	IN-P	0.000000	1576.052509	0.131851	0.000000	0.000000	7.235368	0.003849
Aurora B	157	167	YNYFHDRKRIY		1574.786300	IN-P	3.000000	1577.177253	0.110981	1.124744	0.172341	7.232949	0.018325
Aurora B	157	167	YNYFHDRKRIY		1574.786300	IN-P	10.000000	1577.231136	0.134080	1.178626	0.188048	7.236092	0.019629
Aurora B	157	167	YNYFHDRKRIY		1574.786300	IN-P	30.000002	1577.393664	0.125124	1.341154	0.181771	7.234916	0.017112
Aurora B	157	167	YNYFHDRKRIY		1574.786300	IN-P	90.000008	1577.741983	0.126040	1.689474	0.182403	7.229614	0.016970
Aurora B	157	167	YNYFHDRKRIY		1574.786300	IN-P	300.000000	1577.920397	0.066626	1.867888	0.147728	7.235641	0.018224
Aurora B	157	167	YNYFHDRKRIY		1574.786300	IN-P	MAX	1580.940442	0.152325	4.887933	0.201463	7.236322	0.004143
Aurora B	157	168	YNYFHDRKRIYL		1687.870300	all-P(astr)	0.000000	1689.151947	0.175189	0.000000	0.000000	8.186355	0.003112
Aurora B	157	168	YNYFHDRKRIYL		1687.870300	all-P(astr)	3.000000	1690.306687	0.185156	1.154740	0.254900	8.170811	0.031780
Aurora B	157	168	YNYFHDRKRIYL		1687.870300	all-P(astr)	10.000000	1690.380332	0.183444	1.228385	0.253659	8.171791	0.023770
Aurora B	157	168	YNYFHDRKRIYL		1687.870300	all-P(astr)	30.000002	1690.627343	0.184398	1.475396	0.254350	8.179616	0.029415
Aurora B	157	168	YNYFHDRKRIYL		1687.870300	all-P(astr)	90.000008	1690.875399	0.178424	1.723452	0.250053	8.167315	0.019920
Aurora B	157	168	YNYFHDRKRIYL		1687.870300	all-P(astr)	300.000000	1691.160937	0.191123	2.008991	0.259266	8.169337	0.024729
Aurora B	157	168	YNYFHDRKRIYL		1687.870300	all-P(astr)	MAX	1695.118589	0.143035	5.966642	0.226164	8.178807	0.002109
Aurora B	157	168	YNYFHDRKRIYL		1687.870300	no-P(astr)	0.000000	1689.160511	0.185668	0.000000	0.000000	8.177572	0.003999
Aurora B	157	168	YNYFHDRKRIYL		1687.870300	no-P(astr)	3.000000	1690.369734	0.177916	1.209223	0.257151	8.188170	0.008859
Aurora B	157	168	YNYFHDRKRIYL		1687.870300	no-P(astr)	10.000000	1690.461623	0.184564	1.301112	0.261794	8.177062	0.024706
Aurora B	157	168	YNYFHDRKRIYL		1687.870300	no-P(astr)	30.000002	1690.801978	0.172457	1.641467	0.253405	8.171673	0.026898
Aurora B	157	168	YNYFHDRKRIYL		1687.870300	no-P(astr)	90.000008	1691.166075	0.141650	2.005564	0.233532	8.171889	0.025582
Aurora B	157	168	YNYFHDRKRIYL		1687.870300	no-P(astr)	300.000000	1691.376717	0.198147	2.216206	0.271542	8.176447	0.018246
Aurora B	157	168	YNYFHDRKRIYL		1687.870300	no-P(astr)	MAX	1695.118589	0.143035	5.958078	0.234375	8.178807	0.002109
Aurora B	157	168	YNYFHDRKRIYL		1687.870300	loop-P	0.000000	1689.152968	0.180912	0.000000	0.000000	8.166191	0.005150
Aurora B	157	168	YNYFHDRKRIYL		1687.870300	loop-P	3.000000	1690.264622	0.149087	1.111654	0.234428	8.179474	0.025314
Aurora B	157	168	YNYFHDRKRIYL		1687.870300	loop-P	10.000000	1690.383740	0.178887	1.230772	0.254421	8.175222	0.029008
Aurora B	157	168	YNYFHDRKRIYL		1687.870300	loop-P	30.000002	1690.568705	0.133753	1.415737	0.224987	8.169320	0.020005
Aurora B	157	168	YNYFHDRKRIYL		1687.870300	loop-P	90.000008	1690.978080	0.179238	1.825112	0.254667	8.175507	0.023869
Aurora B	157	168	YNYFHDRKRIYL		1687.870300	loop-P	300.000000	1691.313952	0.125444	2.160984	0.220149	8.169994	0.021140
Aurora B	157	168	YNYFHDRKRIYL		1687.870300	loop-P	MAX	1695.118589	0.143035	5.965621	0.230626	8.178807	0.002109
Aurora B	157	168	YNYFHDRKRIYL		1687.870300	IN-P	0.000000	1689.256329	0.199779	0.000000	0.000000	8.165601	0.005092
Aurora B	157	168	YNYFHDRKRIYL		1687.870300	IN-P	3.000000	1690.375356	0.176777	1.119027	0.266761	8.167440	0.023597
Aurora B	157	168	YNYFHDRKRIYL		1687.870300	IN-P	10.000000	1690.363764	0.141836	1.107435	0.245008	8.168466	0.024148
Aurora B	157	168	YNYFHDRKRIYL		1687.870300	IN-P	30.000002	1690.586979	0.169051	1.330650	0.261705	8.166582	0.022022
Aurora B	157	168	YNYFHDRKRIYL		1687.870300	IN-P	90.000008	1690.954409	0.171799	1.698080	0.263489	8.162023	0.020930
Aurora B	157	168	YNYFHDRKRIYL		1687.870300	IN-P	300.000000	1691.149742	0.122581	1.893413	0.234388	8.164736	0.019581
Aurora B	157	168	YNYFHDRKRIYL		1687.870300	IN-P	MAX	1695.118589	0.143035	5.862260	0.245704	8.178807	0.002109
Aurora B	157	169	YNYFHDRKRIYLM		1818.910800	all-P(astr)	0.000000	1820.054577	0.034516	0.000000	0.000000	8.538496	0.004098
Aurora B	157	169	YNYFHDRKRIYLM		1818.910800	all-P(astr)	3.000000	1821.305192	0.039498	1.250615	0.052454	8.511518	0.031557
Aurora B	157	169	YNYFHDRKRIYLM		1818.910800	all-P(astr)	10.000000	1821.359825	0.036935	1.305248	0.050553	8.512753	0.024870
Aurora B	157	169	YNYFHDRKRIYLM		1818.910800	all-P(astr)	30.000002	1821.578090	0.011158	1.523513	0.036275	8.524181	0.028416
Aurora B	157	169	YNYFHDRKRIYLM		1818.910800	all-P(astr)	90.000008	1821.855139	0.024833	1.800563	0.042521	8.515085	0.020839
Aurora B	157	169	YNYFHDRKRIYLM		1818.910800	all-P(astr)	300.000000	1822.196913	0.033796	2.142336	0.048306	8.510639	0.021954
Aurora B	157	169	YNYFHDRKRIYLM		1818.910800	all-P(astr)	MAX	1826.877766	0.035143	6.823190	0.049258	8.513290	0.007180
Aurora B	157	169	YNYFHDRKRIYLM		1818.910800	no-P(astr)	0.000000	1820.023604	0.037177	0.000000	0.000000	8.528226	0.002637
Aurora B	157	169	YNYFHDRKRIYLM		1818.910800	no-P(astr)	3.000000	1821.320755	0.037615	1.297151	0.052887	8.531062	0.003175
Aurora B	157	169	YNYFHDRKRIYLM		1818.910800	no-P(astr)	10.000000	1821.437221	0.006966	1.413616	0.037824	8.521505	0.025549
Aurora B	157	169	YNYFHDRKRIYLM		1818.910800	no-P(astr)	30.000002	1821.751723	0.009473	1.728119	0.038365	8.515286	0.027096
Aurora B	157	169	YNYFHDRKRIYLM		1818.910800	no-P(astr)	90.000008	1822.265106	0.052693	2.241502	0.064488	8.513296	0.024218
Aurora B	157	169	YNYFHDRKRIYLM		1818.910800	no-P(astr)	300.000000	1822.478307	0.068682	2.454703	0.078098	8.517922	0.020626
Aurora B	157	169	YNYFHDRKRIYLM		1818.910800	no-P(astr)	MAX	1826.877766	0.035143	6.854162	0.051158	8.513290	0.007180
Aurora B	157	169	YNYFHDRKRIYLM		1818.910800	loop-P	0.000000	1820.054256	0.037287	0.000000	0.000000	8.511268	0.003646
Aurora B	157	169	YNYFHDRKRIYLM		1818.910800	loop-P	3.000000	1821.328212	0.114131	1.273956	0.120068	8.523642	0.023979
Aurora B	157	169	YNYFHDRKRIYLM		1818.910800	loop-P	10.000000	1821.359098	0.044242	1.304842	0.057859	8.518792	0.030059
Aurora B	157	169	YNYFHDRKRIYLM		1818.910800	loop-P	30.000002	1821.639755	0.089819	1.585499	0.097251	8.512736	0.018979
Aurora B	157	169	YNYFHDRKRIYLM		1818.910800	loop-P	90.000008	1822.035550	0.075165	1.981294	0.083906	8.516218	0.023166
Aurora B	157	169	YNYFHDRKRIYLM		1818.910800	loop-P	300.000000	1822.403005	0.017801	2.348749	0.041319	8.508868	0.020744
Aurora B	157	169	YNYFHDRKRIYLM		1818.910800	loop-P	MAX	1826.877766	0.035143	6.823510	0.051238	8.513290	0.007180
Aurora B	157	169	YNYFHDRKRIYLM		1818.910800	IN-P	0.000000	1820.097459	0.049230	0.000000	0.000000	8.507213	0.004054
Aurora B	157	169	YNYFHDRKRIYLM		1818.910800	IN-P	3.000000	1821.328838	0.046276	1.231379	0.067565	8.505692	0.025218
Aurora B	157	169	YNYFHDRKRIYLM		1818.910800	IN-P	10.000000	1821.412979	0.078370	1.315520	0.092550	8.507730	0.025421
Aurora B	157	169	YNYFHDRKRIYLM		1818.910800	IN-P	30.000002	1821.647548	0.062745	1.550089	0.079753	8.501384	0.019700
Aurora B	157	169	YNYFHDRKRIYLM		1818.910800	IN-P	90.000008	1821.981973	0.080412	1.884515	0.094285	8.501431	0.023499
Aurora B	157	169	YNYFHDRKRIYLM		1818.910800	IN-P	300.000000	1822.199300	0.022854	2.101841	0.054276	8.508574	0.019266
Aurora B	157	169	YNYFHDRKRIYLM		1818.910800	IN-P	MAX	1826.877766	0.035143	6.780308	0.060487	8.513290	0.007180
Aurora B	157	170	YNYFHDRKRIYLML		1931.994900	all-P(astr)	0.000000	1933.291541	0.076353	0.000000	0.000000	9.493233	0.002501
Aurora B	157	170	YNYFHDRKRIYLML		1931.994900	all-P(astr)	3.000000	1934.279747	0.104264	0.988206	0.129231	9.462088	0.036622
Aurora B	157	170	YNYFHDRKRIYLML		1931.994900	all-P(astr)	10.000000	1934.446989	0.132720	1.155448	0.153115	9.464540	0.028457
Aurora B	157	170	YNYFHDRKRIYLML		1931.994900	all-P(astr)	30.000002	1934.630603	0.130781	1.339062	0.151438	9.474261	0.026850
Aurora B	157	170	YNYFHDRKRIYLML		1931.994900	all-P(astr)	90.000008	1934.914345	0.154901	1.622804	0.172696	9.461909	0.022840
Aurora B	157	170	YNYFHDRKRIYLML		1931.994900	all-P(astr)	300.000000	1935.190502	0.152202	1.898961	0.170280	9.465309	0.023390
Aurora B	157	170	YNYFHDRKRIYLML		1931.994900	all-P(astr)	MAX	1941.211468	0.087005	7.919927	0.115757	9.492219	0.003846
Aurora B	157	170	YNYFHDRKRIYLML		1931.994900	no-P(astr)	0.000000	1933.300824	0.073146	0.000000	0.000000	9.483871	0.004629
Aurora B	157	170	YNYFHDRKRIYLML		1931.994900	no-P(astr)	3.000000	1934.369687	0.102970	1.068863	0.126306	9.482314	0.005240
Aurora B	157	170	YNYFHDRKRIYLML		1931.994900	no-P(astr)	10.000000	1934.474963	0.101790	1.174139	0.125346	9.467269	0.024431
Aurora B	157	170	YNYFHDRKRIYLML		1931.994900	no-P(astr)	30.000002	1934.788137	0.107545	1.487313	0.130062	9.463965	0.024979
Aurora B	157	170	YNYFHDRKRIYLML		1931.994900	no-P(astr)	90.000008	1935.209559	0.152793	1.908734	0.169399	9.469894	0.026884
Aurora B	157	170	YNYFHDRKRIYLML		1931.994900	no-P(astr)	300.000000	1935.353730	0.147791	2.052905	0.164902	9.471052	0.020156
Aurora B	157	170	YNYFHDRKRIYLML		1931.994900	no-P(astr)	MAX	1941.211468	0.087005	7.910644	0.113667	9.492219	0.003846
Aurora B	157	170	YNYFHDRKRIYLML		1931.994900	loop-P	0.000000	1933.308286	0.086316	0.000000	0.000000	9.466263	0.002671
Aurora B	157	170	YNYFHDRKRIYLML		1931.994900	loop-P	3.000000	1934.310740	0.090903	1.002454	0.125355	9.476941	0.023556
Aurora B	157	170	YNYFHDRKRIYLML		1931.994900	loop-P	10.000000	1934.404447	0.096598	1.096161	0.129544	9.467797	0.028323
Aurora B	157	170	YNYFHDRKRIYLML		1931.994900	loop-P	30.000002	1934.613976	0.086586	1.305691	0.122260	9.467741	0.021540
Aurora B	157	170	YNYFHDRKRIYLML		1931.994900	loop-P	90.000008	1934.906071	0.084445	1.597785	0.120753	9.467488	0.026507
Aurora B	157	170	YNYFHDRKRIYLML		1931.994900	loop-P	300.000000	1935.227312	0.066821	1.919026	0.109158	9.460981	0.021956
Aurora B	157	170	YNYFHDRKRIYLML		1931.994900	loop-P	MAX	1941.211468	0.087005	7.903182	0.122558	9.492219	0.003846
Aurora B	157	170	YNYFHDRKRIYLML		1931.994900	IN-P	0.000000	1933.447296	0.157635	0.000000	0.000000	9.454662	0.005076
Aurora B	157	170	YNYFHDRKRIYLML		1931.994900	IN-P	3.000000	1934.332670	0.101359	0.885374	0.187410	9.453334	0.025606
Aurora B	157	170	YNYFHDRKRIYLML		1931.994900	IN-P	10.000000	1934.469844	0.098259	1.022548	0.185751	9.456755	0.027842
Aurora B	157	170	YNYFHDRKRIYLML		1931.994900	IN-P	30.000002	1934.611033	0.118614	1.163737	0.197277	9.452258	0.022888
Aurora B	157	170	YNYFHDRKRIYLML		1931.994900	IN-P	90.000008	1934.973768	0.166401	1.526473	0.229212	9.452650	0.026258
Aurora B	157	170	YNYFHDRKRIYLML		1931.994900	IN-P	300.000000	1935.078828	0.108145	1.631533	0.191165	9.458021	0.026440
Aurora B	157	170	YNYFHDRKRIYLML		1931.994900	IN-P	MAX	1941.211468	0.087005	7.764172	0.180052	9.492219	0.003846
Aurora B	166	173	IYLMLEFA	Oxidation M (4)	1015.516900	all-P(astr)	0.000000	1016.005578	0.039197	0.000000	0.000000	7.636823	0.002482
Aurora B	166	173	IYLMLEFA	Oxidation M (4)	1015.516900	all-P(astr)	3.000000	1020.224249	0.045011	4.218671	0.059686	7.639630	0.040640
Aurora B	166	173	IYLMLEFA	Oxidation M (4)	1015.516900	all-P(astr)	10.000000	1020.348262	0.088727	4.342684	0.097000	7.643755	0.037892
Aurora B	166	173	IYLMLEFA	Oxidation M (4)	1015.516900	all-P(astr)	30.000002	1020.401380	0.108437	4.395802	0.115304	7.648976	0.035081
Aurora B	166	173	IYLMLEFA	Oxidation M (4)	1015.516900	all-P(astr)	90.000008	1020.445031	0.129155	4.439453	0.134972	7.639914	0.032349
Aurora B	166	173	IYLMLEFA	Oxidation M (4)	1015.516900	all-P(astr)	300.000000	1020.449450	0.130805	4.443872	0.136552	7.640399	0.036918
Aurora B	166	173	IYLMLEFA	Oxidation M (4)	1015.516900	all-P(astr)	MAX	1020.675845	0.075755	4.670267	0.085295	7.683669	0.002327
Aurora B	166	173	IYLMLEFA	Oxidation M (4)	1015.516900	no-P(astr)	0.000000	1016.027664	0.021430	0.000000	0.000000	7.632915	0.003534
Aurora B	166	173	IYLMLEFA	Oxidation M (4)	1015.516900	no-P(astr)	3.000000	1020.384735	0.048117	4.357071	0.052673	7.649618	0.027118
Aurora B	166	173	IYLMLEFA	Oxidation M (4)	1015.516900	no-P(astr)	10.000000	1020.388583	0.115848	4.360919	0.117813	7.648012	0.036020
Aurora B	166	173	IYLMLEFA	Oxidation M (4)	1015.516900	no-P(astr)	30.000002	1020.476908	0.148951	4.449244	0.150485	7.638961	0.034495
Aurora B	166	173	IYLMLEFA	Oxidation M (4)	1015.516900	no-P(astr)	90.000008	1020.442093	0.117030	4.414429	0.118976	7.642532	0.037893
Aurora B	166	173	IYLMLEFA	Oxidation M (4)	1015.516900	no-P(astr)	300.000000	1020.522219	0.091546	4.494555	0.094021	7.648855	0.031912
Aurora B	166	173	IYLMLEFA	Oxidation M (4)	1015.516900	no-P(astr)	MAX	1020.675845	0.075755	4.648181	0.078728	7.683669	0.002327
Aurora B	166	173	IYLMLEFA	Oxidation M (4)	1015.516900	loop-P	0.000000	1016.008858	0.046964	0.000000	0.000000	7.620569	0.002711
Aurora B	166	173	IYLMLEFA	Oxidation M (4)	1015.516900	loop-P	3.000000	1020.412447	0.089099	4.403590	0.100718	7.650787	0.033085
Aurora B	166	173	IYLMLEFA	Oxidation M (4)	1015.516900	loop-P	10.000000	1020.483003	0.098335	4.474146	0.108975	7.642174	0.041159
Aurora B	166	173	IYLMLEFA	Oxidation M (4)	1015.516900	loop-P	30.000002	1020.500184	0.138535	4.491326	0.146279	7.641690	0.033836
Aurora B	166	173	IYLMLEFA	Oxidation M (4)	1015.516900	loop-P	90.000008	1020.535291	0.167498	4.526433	0.173957	7.646883	0.037963
Aurora B	166	173	IYLMLEFA	Oxidation M (4)	1015.516900	loop-P	300.000000	1020.473719	0.093459	4.464861	0.104595	7.642734	0.032849
Aurora B	166	173	IYLMLEFA	Oxidation M (4)	1015.516900	loop-P	MAX	1020.675845	0.075755	4.666987	0.089132	7.683669	0.002327
Aurora B	166	173	IYLMLEFA	Oxidation M (4)	1015.516900	IN-P	0.000000	1015.986816	0.017526	0.000000	0.000000	7.622677	0.003600
Aurora B	166	173	IYLMLEFA	Oxidation M (4)	1015.516900	IN-P	3.000000	1020.266576	0.055522	4.279760	0.058223	7.631783	0.033666
Aurora B	166	173	IYLMLEFA	Oxidation M (4)	1015.516900	IN-P	10.000000	1020.365548	0.121198	4.378733	0.122458	7.638743	0.036002
Aurora B	166	173	IYLMLEFA	Oxidation M (4)	1015.516900	IN-P	30.000002	1020.408586	0.067939	4.421771	0.070163	7.641200	0.033613
Aurora B	166	173	IYLMLEFA	Oxidation M (4)	1015.516900	IN-P	90.000008	1020.443539	0.110839	4.456723	0.112216	7.631281	0.036018
Aurora B	166	173	IYLMLEFA	Oxidation M (4)	1015.516900	IN-P	300.000000	1020.437468	0.120205	4.450652	0.121475	7.639247	0.030957
Aurora B	166	173	IYLMLEFA	Oxidation M (4)	1015.516900	IN-P	MAX	1020.675845	0.075755	4.689029	0.077756	7.683669	0.002327
Aurora B	170	177	LEFAPRGE		918.468000	all-P(astr)	3.000000	925.328974	0.003117	NaN	NaN	7.448239	0.022651
Aurora B	170	177	LEFAPRGE		918.468000	all-P(astr)	10.000000	925.687925	0.001634	NaN	NaN	7.443167	0.014167
Aurora B	170	177	LEFAPRGE		918.468000	all-P(astr)	30.000002	926.011744	0.044265	NaN	NaN	7.452435	0.017125
Aurora B	170	177	LEFAPRGE		918.468000	all-P(astr)	90.000008	926.290933	0.020413	NaN	NaN	7.440931	0.015428
Aurora B	170	177	LEFAPRGE		918.468000	all-P(astr)	300.000000	926.691768	0.053303	NaN	NaN	7.442774	0.018014
Aurora B	170	177	LEFAPRGE		918.468000	no-P(astr)	3.000000	925.689213	0.044817	NaN	NaN	7.458494	0.004623
Aurora B	170	177	LEFAPRGE		918.468000	no-P(astr)	10.000000	926.087575	0.012704	NaN	NaN	7.445562	0.016985
Aurora B	170	177	LEFAPRGE		918.468000	no-P(astr)	30.000002	926.395230	0.075830	NaN	NaN	7.446498	0.018600
Aurora B	170	177	LEFAPRGE		918.468000	no-P(astr)	90.000008	926.617486	0.106911	NaN	NaN	7.444530	0.014768
Aurora B	170	177	LEFAPRGE		918.468000	no-P(astr)	300.000000	926.850171	0.127066	NaN	NaN	7.447371	0.008648
Aurora B	170	177	LEFAPRGE		918.468000	loop-P	3.000000	925.540252	0.003577	NaN	NaN	7.455139	0.018467
Aurora B	170	177	LEFAPRGE		918.468000	loop-P	10.000000	925.830768	0.101773	NaN	NaN	7.449631	0.014965
Aurora B	170	177	LEFAPRGE		918.468000	loop-P	30.000002	926.333091	0.032381	NaN	NaN	7.443142	0.011558
Aurora B	170	177	LEFAPRGE		918.468000	loop-P	90.000008	926.518266	0.068460	NaN	NaN	7.446000	0.015500
Aurora B	170	177	LEFAPRGE		918.468000	loop-P	300.000000	926.716392	0.117917	NaN	NaN	7.444021	0.011638
Aurora B	170	177	LEFAPRGE		918.468000	IN-P	3.000000	925.675887	0.000000	NaN	NaN	7.451708	0.000000
Aurora B	170	177	LEFAPRGE		918.468000	IN-P	10.000000	924.418035	0.000000	NaN	NaN	7.682356	0.000000
Aurora B	170	177	LEFAPRGE		918.468000	IN-P	30.000002	924.956171	0.000000	NaN	NaN	7.662192	0.000000
Aurora B	170	177	LEFAPRGE		918.468000	IN-P	90.000008	926.720378	0.000000	NaN	NaN	7.448220	0.000000
Aurora B	170	177	LEFAPRGE		918.468000	IN-P	300.000000	926.911255	0.000000	NaN	NaN	7.450353	0.000000
Aurora B	170	178	LEFAPRGEL		1031.552000	all-P(astr)	0.000000	1032.160735	0.041125	0.000000	0.000000	8.567322	0.004598
Aurora B	170	178	LEFAPRGEL		1031.552000	all-P(astr)	3.000000	1033.270078	0.016209	1.109343	0.044204	8.577258	0.044570
Aurora B	170	178	LEFAPRGEL		1031.552000	all-P(astr)	10.000000	1033.900837	0.011839	1.740102	0.042795	8.583064	0.037733
Aurora B	170	178	LEFAPRGEL		1031.552000	all-P(astr)	30.000002	1034.522705	0.033573	2.361970	0.053089	8.589894	0.042990
Aurora B	170	178	LEFAPRGEL		1031.552000	all-P(astr)	90.000008	1035.093948	0.015743	2.933213	0.044035	8.584844	0.034124
Aurora B	170	178	LEFAPRGEL		1031.552000	all-P(astr)	300.000000	1035.823942	0.056873	3.663207	0.070184	8.581470	0.038322
Aurora B	170	178	LEFAPRGEL		1031.552000	all-P(astr)	MAX	1036.629888	0.030106	4.469153	0.050967	8.623034	0.001290
Aurora B	170	178	LEFAPRGEL		1031.552000	no-P(astr)	0.000000	1032.146789	0.029750	0.000000	0.000000	8.564770	0.002161
Aurora B	170	178	LEFAPRGEL		1031.552000	no-P(astr)	3.000000	1033.656879	0.031405	1.510090	0.043259	8.590905	0.025345
Aurora B	170	178	LEFAPRGEL		1031.552000	no-P(astr)	10.000000	1034.256318	0.026200	2.109529	0.039642	8.588256	0.041369
Aurora B	170	178	LEFAPRGEL		1031.552000	no-P(astr)	30.000002	1034.785310	0.031851	2.638520	0.043584	8.583994	0.042222
Aurora B	170	178	LEFAPRGEL		1031.552000	no-P(astr)	90.000008	1035.387454	0.038093	3.240665	0.048334	8.582521	0.037948
Aurora B	170	178	LEFAPRGEL		1031.552000	no-P(astr)	300.000000	1035.827066	0.128292	3.680276	0.131697	8.585057	0.033647
Aurora B	170	178	LEFAPRGEL		1031.552000	no-P(astr)	MAX	1036.629888	0.030106	4.483099	0.042326	8.623034	0.001290
Aurora B	170	178	LEFAPRGEL		1031.552000	loop-P	0.000000	1032.181030	0.049880	0.000000	0.000000	8.553632	0.005272
Aurora B	170	178	LEFAPRGEL		1031.552000	loop-P	3.000000	1033.495385	0.035205	1.314355	0.061052	8.592330	0.039115
Aurora B	170	178	LEFAPRGEL		1031.552000	loop-P	10.000000	1034.038896	0.068365	1.857866	0.084627	8.581839	0.045034
Aurora B	170	178	LEFAPRGEL		1031.552000	loop-P	30.000002	1034.643943	0.032291	2.462913	0.059420	8.583431	0.038041
Aurora B	170	178	LEFAPRGEL		1031.552000	loop-P	90.000008	1035.291599	0.030726	3.110569	0.058584	8.586402	0.039731
Aurora B	170	178	LEFAPRGEL		1031.552000	loop-P	300.000000	1036.005107	0.042661	3.824077	0.065635	8.579691	0.036547
Aurora B	170	178	LEFAPRGEL		1031.552000	loop-P	MAX	1036.629888	0.030106	4.448858	0.058261	8.623034	0.001290
Aurora B	170	178	LEFAPRGEL		1031.552000	IN-P	0.000000	1032.188641	0.041461	0.000000	0.000000	8.557117	0.004258
Aurora B	170	178	LEFAPRGEL		1031.552000	IN-P	3.000000	1033.398938	0.035126	1.210296	0.054340	8.583573	0.038420
Aurora B	170	178	LEFAPRGEL		1031.552000	IN-P	10.000000	1033.960858	0.012809	1.772217	0.043394	8.587430	0.043335
Aurora B	170	178	LEFAPRGEL		1031.552000	IN-P	30.000002	1034.534315	0.009615	2.345674	0.042561	8.586604	0.036995
Aurora B	170	178	LEFAPRGEL		1031.552000	IN-P	90.000008	1035.111210	0.008863	2.922569	0.042398	8.579667	0.038978
Aurora B	170	178	LEFAPRGEL		1031.552000	IN-P	300.000000	1035.608140	0.028183	3.419499	0.050133	8.584851	0.033999
Aurora B	170	178	LEFAPRGEL		1031.552000	IN-P	MAX	1036.629888	0.030106	4.441247	0.051239	8.623034	0.001290
Aurora B	171	178	EFAPRGEL		918.468000	all-P(astr)	0.000000	918.910624	0.014461	0.000000	0.000000	7.645152	0.002630
Aurora B	171	178	EFAPRGEL		918.468000	all-P(astr)	3.000000	920.060932	0.004026	1.150308	0.015011	7.644900	0.036559
Aurora B	171	178	EFAPRGEL		918.468000	all-P(astr)	10.000000	920.654772	0.002467	1.744147	0.014670	7.646929	0.030971
Aurora B	171	178	EFAPRGEL		918.468000	all-P(astr)	30.000002	921.275110	0.018114	2.364485	0.023178	7.658978	0.033735
Aurora B	171	178	EFAPRGEL		918.468000	all-P(astr)	90.000008	921.790258	0.050220	2.879634	0.052260	7.645946	0.026794
Aurora B	171	178	EFAPRGEL		918.468000	all-P(astr)	300.000000	922.269581	0.010142	3.358956	0.017663	7.648687	0.029071
Aurora B	171	178	EFAPRGEL		918.468000	all-P(astr)	MAX	922.695632	0.022742	3.785008	0.026950	7.673881	0.002273
Aurora B	171	178	EFAPRGEL		918.468000	no-P(astr)	0.000000	918.917199	0.014408	0.000000	0.000000	7.638374	0.002659
Aurora B	171	178	EFAPRGEL		918.468000	no-P(astr)	3.000000	920.466548	0.024931	1.549349	0.028795	7.657912	0.020435
Aurora B	171	178	EFAPRGEL		918.468000	no-P(astr)	10.000000	921.010767	0.019410	2.093569	0.024173	7.658597	0.030578
Aurora B	171	178	EFAPRGEL		918.468000	no-P(astr)	30.000002	921.538862	0.008936	2.621664	0.016954	7.648325	0.032652
Aurora B	171	178	EFAPRGEL		918.468000	no-P(astr)	90.000008	921.951456	0.024125	3.034257	0.028099	7.647998	0.032717
Aurora B	171	178	EFAPRGEL		918.468000	no-P(astr)	300.000000	922.214611	0.103166	3.297412	0.104168	7.653403	0.026422
Aurora B	171	178	EFAPRGEL		918.468000	no-P(astr)	MAX	922.695632	0.022742	3.778434	0.026922	7.673881	0.002273
Aurora B	171	178	EFAPRGEL		918.468000	loop-P	0.000000	918.928181	0.013900	0.000000	0.000000	7.630894	0.002097
Aurora B	171	178	EFAPRGEL		918.468000	loop-P	3.000000	920.246324	0.011519	1.318143	0.018053	7.659608	0.029683
Aurora B	171	178	EFAPRGEL		918.468000	loop-P	10.000000	920.787397	0.044424	1.859216	0.046547	7.653399	0.035876
Aurora B	171	178	EFAPRGEL		918.468000	loop-P	30.000002	921.350718	0.007359	2.422537	0.015728	7.651531	0.029396
Aurora B	171	178	EFAPRGEL		918.468000	loop-P	90.000008	921.825430	0.007203	2.897249	0.015656	7.653880	0.031301
Aurora B	171	178	EFAPRGEL		918.468000	loop-P	300.000000	922.329570	0.002555	3.401389	0.014133	7.647424	0.026571
Aurora B	171	178	EFAPRGEL		918.468000	loop-P	MAX	922.695632	0.022742	3.767452	0.026654	7.673881	0.002273
Aurora B	171	178	EFAPRGEL		918.468000	IN-P	0.000000	918.987601	0.004058	0.000000	0.000000	7.631990	0.004512
Aurora B	171	178	EFAPRGEL		918.468000	IN-P	3.000000	920.180266	0.008428	1.192665	0.009354	7.647117	0.028439
Aurora B	171	178	EFAPRGEL		918.468000	IN-P	10.000000	920.725956	0.030784	1.738355	0.031051	7.648789	0.034005
Aurora B	171	178	EFAPRGEL		918.468000	IN-P	30.000002	921.276724	0.005477	2.289122	0.006816	7.645478	0.025872
Aurora B	171	178	EFAPRGEL		918.468000	IN-P	90.000008	921.735093	0.044736	2.747492	0.044919	7.639110	0.031219
Aurora B	171	178	EFAPRGEL		918.468000	IN-P	300.000000	922.058399	0.023337	3.070798	0.023687	7.646333	0.027004
Aurora B	171	178	EFAPRGEL		918.468000	IN-P	MAX	922.695632	0.022742	3.708031	0.023101	7.673881	0.002273
Aurora B	172	178	FAPRGEL		789.425400	all-P(astr)	0.000000	789.859209	0.034012	0.000000	0.000000	7.199902	0.003737
Aurora B	172	178	FAPRGEL		789.425400	all-P(astr)	3.000000	790.982124	0.046694	1.122915	0.057768	7.199245	0.033803
Aurora B	172	178	FAPRGEL		789.425400	all-P(astr)	10.000000	791.462124	0.044908	1.602915	0.056334	7.198900	0.025670
Aurora B	172	178	FAPRGEL		789.425400	all-P(astr)	30.000002	791.954537	0.052458	2.095328	0.062519	7.208627	0.029167
Aurora B	172	178	FAPRGEL		789.425400	all-P(astr)	90.000008	792.412622	0.037673	2.553412	0.050755	7.195140	0.021455
Aurora B	172	178	FAPRGEL		789.425400	all-P(astr)	300.000000	792.887754	0.023236	3.028544	0.041191	7.196345	0.023692
Aurora B	172	178	FAPRGEL		789.425400	all-P(astr)	MAX	793.344885	0.024343	3.485675	0.041825	7.209358	0.001220
Aurora B	172	178	FAPRGEL		789.425400	no-P(astr)	0.000000	789.892910	0.050670	0.000000	0.000000	7.194197	0.004139
Aurora B	172	178	FAPRGEL		789.425400	no-P(astr)	3.000000	791.269857	0.039963	1.376947	0.064533	7.205500	0.017652
Aurora B	172	178	FAPRGEL		789.425400	no-P(astr)	10.000000	791.704189	0.042164	1.811279	0.065919	7.205084	0.026446
Aurora B	172	178	FAPRGEL		789.425400	no-P(astr)	30.000002	792.205421	0.032827	2.312511	0.060374	7.197931	0.028680
Aurora B	172	178	FAPRGEL		789.425400	no-P(astr)	90.000008	792.590206	0.016461	2.697296	0.053277	7.199647	0.027341
Aurora B	172	178	FAPRGEL		789.425400	no-P(astr)	300.000000	792.828893	0.109108	2.935983	0.120300	7.200664	0.022345
Aurora B	172	178	FAPRGEL		789.425400	no-P(astr)	MAX	793.344885	0.024343	3.451975	0.056214	7.209358	0.001220
Aurora B	172	178	FAPRGEL		789.425400	loop-P	0.000000	789.902911	0.045146	0.000000	0.000000	7.180862	0.002104
Aurora B	172	178	FAPRGEL		789.425400	loop-P	3.000000	791.052643	0.043154	1.149732	0.062454	7.206376	0.025920
Aurora B	172	178	FAPRGEL		789.425400	loop-P	10.000000	791.456888	0.053020	1.553977	0.069637	7.201492	0.030810
Aurora B	172	178	FAPRGEL		789.425400	loop-P	30.000002	791.983035	0.009922	2.080124	0.046224	7.198612	0.024782
Aurora B	172	178	FAPRGEL		789.425400	loop-P	90.000008	792.465881	0.026082	2.562970	0.052139	7.204406	0.025645
Aurora B	172	178	FAPRGEL		789.425400	loop-P	300.000000	792.908246	0.063459	3.005334	0.077880	7.195610	0.020879
Aurora B	172	178	FAPRGEL		789.425400	loop-P	MAX	793.344885	0.024343	3.441973	0.051291	7.209358	0.001220
Aurora B	172	178	FAPRGEL		789.425400	IN-P	0.000000	790.023674	0.088386	0.000000	0.000000	7.187480	0.004309
Aurora B	172	178	FAPRGEL		789.425400	IN-P	3.000000	791.054207	0.078154	1.030533	0.117984	7.194062	0.023277
Aurora B	172	178	FAPRGEL		789.425400	IN-P	10.000000	791.476814	0.045028	1.453141	0.099195	7.201347	0.028496
Aurora B	172	178	FAPRGEL		789.425400	IN-P	30.000002	791.959065	0.037743	1.935391	0.096107	7.192624	0.022267
Aurora B	172	178	FAPRGEL		789.425400	IN-P	90.000008	792.422985	0.038928	2.399311	0.096579	7.190510	0.024156
Aurora B	172	178	FAPRGEL		789.425400	IN-P	300.000000	792.696685	0.021750	2.673011	0.091023	7.196366	0.022574
Aurora B	172	178	FAPRGEL		789.425400	IN-P	MAX	793.344885	0.024343	3.321211	0.091677	7.209358	0.001220
Aurora B	173	178	APRGEL		642.357000	all-P(astr)	0.000000	642.640696	0.023732	0.000000	0.000000	7.644832	0.002454
Aurora B	173	178	APRGEL		642.357000	all-P(astr)	3.000000	643.437455	0.030748	0.796759	0.038841	7.648748	0.040304
Aurora B	173	178	APRGEL		642.357000	all-P(astr)	10.000000	643.889929	0.023404	1.249233	0.033330	7.649692	0.032366
Aurora B	173	178	APRGEL		642.357000	all-P(astr)	30.000002	644.327543	0.051645	1.686846	0.056836	7.656572	0.037041
Aurora B	173	178	APRGEL		642.357000	all-P(astr)	90.000008	644.695964	0.057198	2.055268	0.061926	7.644317	0.026909
Aurora B	173	178	APRGEL		642.357000	all-P(astr)	300.000000	645.106449	0.087968	2.465752	0.091113	7.647330	0.031471
Aurora B	173	178	APRGEL		642.357000	all-P(astr)	MAX	645.438404	0.069390	2.797708	0.073336	7.672049	0.003864
Aurora B	173	178	APRGEL		642.357000	no-P(astr)	0.000000	642.643250	0.010227	0.000000	0.000000	7.638411	0.000730
Aurora B	173	178	APRGEL		642.357000	no-P(astr)	3.000000	643.729037	0.022610	1.085787	0.024816	7.659486	0.021495
Aurora B	173	178	APRGEL		642.357000	no-P(astr)	10.000000	644.115282	0.041195	1.472032	0.042445	7.654233	0.033486
Aurora B	173	178	APRGEL		642.357000	no-P(astr)	30.000002	644.504503	0.061782	1.861253	0.062622	7.647767	0.033825
Aurora B	173	178	APRGEL		642.357000	no-P(astr)	90.000008	644.847850	0.057767	2.204601	0.058665	7.647443	0.033206
Aurora B	173	178	APRGEL		642.357000	no-P(astr)	300.000000	645.080891	0.130581	2.437641	0.130981	7.652879	0.027549
Aurora B	173	178	APRGEL		642.357000	no-P(astr)	MAX	645.438404	0.069390	2.795154	0.070140	7.672049	0.003864
Aurora B	173	178	APRGEL		642.357000	loop-P	0.000000	642.639695	0.012564	0.000000	0.000000	7.629728	0.000724
Aurora B	173	178	APRGEL		642.357000	loop-P	3.000000	643.579532	0.029612	0.939837	0.032167	7.659765	0.032072
Aurora B	173	178	APRGEL		642.357000	loop-P	10.000000	643.929310	0.045560	1.289614	0.047261	7.654480	0.037063
Aurora B	173	178	APRGEL		642.357000	loop-P	30.000002	644.414660	0.059680	1.774964	0.060988	7.652018	0.029199
Aurora B	173	178	APRGEL		642.357000	loop-P	90.000008	644.793735	0.084474	2.154040	0.085403	7.654055	0.030477
Aurora B	173	178	APRGEL		642.357000	loop-P	300.000000	645.174790	0.067489	2.535095	0.068648	7.644702	0.027495
Aurora B	173	178	APRGEL		642.357000	loop-P	MAX	645.438404	0.069390	2.798709	0.070518	7.672049	0.003864
Aurora B	173	178	APRGEL		642.357000	IN-P	0.000000	642.690112	0.016561	0.000000	0.000000	7.631927	0.004845
Aurora B	173	178	APRGEL		642.357000	IN-P	3.000000	643.507097	0.020407	0.816985	0.026281	7.646406	0.029050
Aurora B	173	178	APRGEL		642.357000	IN-P	10.000000	643.950173	0.044611	1.260061	0.047586	7.647357	0.033051
Aurora B	173	178	APRGEL		642.357000	IN-P	30.000002	644.405409	0.036462	1.715296	0.040046	7.645241	0.025493
Aurora B	173	178	APRGEL		642.357000	IN-P	90.000008	644.746741	0.076432	2.056628	0.078206	7.637097	0.028967
Aurora B	173	178	APRGEL		642.357000	IN-P	300.000000	644.983897	0.052231	2.293785	0.054793	7.642985	0.029228
Aurora B	173	178	APRGEL		642.357000	IN-P	MAX	645.438404	0.069390	2.748292	0.071339	7.672049	0.003864
Aurora B	174	178	PRGEL		571.319800	all-P(astr)	0.000000	571.576406	0.005215	0.000000	0.000000	7.644543	0.001509
Aurora B	174	178	PRGEL		571.319800	all-P(astr)	3.000000	572.235263	0.011347	0.658857	0.012488	7.647731	0.039275
Aurora B	174	178	PRGEL		571.319800	all-P(astr)	10.000000	572.625616	0.001369	1.049209	0.005392	7.647653	0.032786
Aurora B	174	178	PRGEL		571.319800	all-P(astr)	30.000002	573.004434	0.011416	1.428028	0.012550	7.655287	0.036718
Aurora B	174	178	PRGEL		571.319800	all-P(astr)	90.000008	573.302893	0.005946	1.726487	0.007909	7.645419	0.027797
Aurora B	174	178	PRGEL		571.319800	all-P(astr)	300.000000	573.572004	0.023148	1.995598	0.023728	7.647763	0.032079
Aurora B	174	178	PRGEL		571.319800	all-P(astr)	MAX	573.732115	0.006165	2.155709	0.008075	7.673175	0.002649
Aurora B	174	178	PRGEL		571.319800	no-P(astr)	0.000000	571.585706	0.001876	0.000000	0.000000	7.636127	0.001216
Aurora B	174	178	PRGEL		571.319800	no-P(astr)	3.000000	572.467840	0.017544	0.882135	0.017644	7.659068	0.021038
Aurora B	174	178	PRGEL		571.319800	no-P(astr)	10.000000	572.815585	0.013445	1.229879	0.013575	7.654715	0.033063
Aurora B	174	178	PRGEL		571.319800	no-P(astr)	30.000002	573.192420	0.028336	1.606715	0.028398	7.647916	0.033915
Aurora B	174	178	PRGEL		571.319800	no-P(astr)	90.000008	573.421709	0.012362	1.836003	0.012504	7.647080	0.032774
Aurora B	174	178	PRGEL		571.319800	no-P(astr)	300.000000	573.521679	0.109344	1.935974	0.109360	7.652715	0.027098
Aurora B	174	178	PRGEL		571.319800	no-P(astr)	MAX	573.732115	0.006165	2.146410	0.006444	7.673175	0.002649
Aurora B	174	178	PRGEL		571.319800	loop-P	0.000000	571.573197	0.002797	0.000000	0.000000	7.629999	0.000321
Aurora B	174	178	PRGEL		571.319800	loop-P	3.000000	572.373989	0.004344	0.800792	0.005167	7.658721	0.032472
Aurora B	174	178	PRGEL		571.319800	loop-P	10.000000	572.687687	0.038444	1.114490	0.038546	7.653565	0.038335
Aurora B	174	178	PRGEL		571.319800	loop-P	30.000002	573.032845	0.002217	1.459648	0.003569	7.650255	0.029752
Aurora B	174	178	PRGEL		571.319800	loop-P	90.000008	573.320236	0.001228	1.747039	0.003054	7.653742	0.031196
Aurora B	174	178	PRGEL		571.319800	loop-P	300.000000	573.595173	0.029879	2.021976	0.030010	7.644296	0.027684
Aurora B	174	178	PRGEL		571.319800	loop-P	MAX	573.732115	0.006165	2.158918	0.006770	7.673175	0.002649
Aurora B	174	178	PRGEL		571.319800	IN-P	0.000000	571.623800	0.011561	0.000000	0.000000	7.634049	0.004621
Aurora B	174	178	PRGEL		571.319800	IN-P	3.000000	572.296465	0.005853	0.672665	0.012959	7.647152	0.028776
Aurora B	174	178	PRGEL		571.319800	IN-P	10.000000	572.730489	0.028704	1.106689	0.030945	7.649696	0.033194
Aurora B	174	178	PRGEL		571.319800	IN-P	30.000002	573.017390	0.034018	1.393590	0.035929	7.646638	0.026119
Aurora B	174	178	PRGEL		571.319800	IN-P	90.000008	573.319403	0.004975	1.695602	0.012587	7.637528	0.027440
Aurora B	174	178	PRGEL		571.319800	IN-P	300.000000	573.553754	0.018169	1.929953	0.021536	7.644733	0.026785
Aurora B	174	178	PRGEL		571.319800	IN-P	MAX	573.732115	0.006165	2.108315	0.013103	7.673175	0.002649
Aurora B	179	188	YKELQKHGRF		1305.706200	all-P(astr)	0.000000	1306.808222	0.148255	0.000000	0.000000	6.052536	0.003504
Aurora B	179	188	YKELQKHGRF		1305.706200	all-P(astr)	3.000000	1308.416426	0.143685	1.608204	0.206458	6.026332	0.013777
Aurora B	179	188	YKELQKHGRF		1305.706200	all-P(astr)	10.000000	1309.200279	0.127215	2.392057	0.195354	6.020460	0.005481
Aurora B	179	188	YKELQKHGRF		1305.706200	all-P(astr)	30.000002	1309.827390	0.124721	3.019167	0.193739	6.026054	0.011702
Aurora B	179	188	YKELQKHGRF		1305.706200	all-P(astr)	90.000008	1310.219489	0.086354	3.411267	0.171571	6.013988	0.001112
Aurora B	179	188	YKELQKHGRF		1305.706200	all-P(astr)	300.000000	1310.448614	0.085623	3.640391	0.171204	6.014557	0.003239
Aurora B	179	188	YKELQKHGRF		1305.706200	all-P(astr)	MAX	1310.945496	0.115035	4.137273	0.187650	5.990349	0.003496
Aurora B	179	188	YKELQKHGRF		1305.706200	no-P(astr)	0.000000	1306.799627	0.134816	0.000000	0.000000	6.036787	0.003195
Aurora B	179	188	YKELQKHGRF		1305.706200	no-P(astr)	3.000000	1308.581421	0.121976	1.781794	0.181806	6.025261	0.001256
Aurora B	179	188	YKELQKHGRF		1305.706200	no-P(astr)	10.000000	1309.184003	0.097122	2.384376	0.166157	6.026583	0.005142
Aurora B	179	188	YKELQKHGRF		1305.706200	no-P(astr)	30.000002	1309.813220	0.122036	3.013593	0.181846	6.018473	0.008788
Aurora B	179	188	YKELQKHGRF		1305.706200	no-P(astr)	90.000008	1310.241645	0.090905	3.442018	0.162601	6.017763	0.007099
Aurora B	179	188	YKELQKHGRF		1305.706200	no-P(astr)	300.000000	1310.557978	0.106831	3.758351	0.172012	6.023901	0.001539
Aurora B	179	188	YKELQKHGRF		1305.706200	no-P(astr)	MAX	1310.945496	0.115035	4.145868	0.177224	5.990349	0.003496
Aurora B	179	188	YKELQKHGRF		1305.706200	loop-P	0.000000	1306.821011	0.151847	0.000000	0.000000	6.034848	0.000700
Aurora B	179	188	YKELQKHGRF		1305.706200	loop-P	3.000000	1308.472845	0.090898	1.651834	0.176975	6.026720	0.005937
Aurora B	179	188	YKELQKHGRF		1305.706200	loop-P	10.000000	1309.121081	0.149549	2.300070	0.213125	6.018278	0.012705
Aurora B	179	188	YKELQKHGRF		1305.706200	loop-P	30.000002	1309.823183	0.089128	3.002172	0.176072	6.016948	0.003608
Aurora B	179	188	YKELQKHGRF		1305.706200	loop-P	90.000008	1310.278030	0.077989	3.457018	0.170704	6.021625	0.007447
Aurora B	179	188	YKELQKHGRF		1305.706200	loop-P	300.000000	1310.532905	0.083676	3.711894	0.173376	6.012416	0.001010
Aurora B	179	188	YKELQKHGRF		1305.706200	loop-P	MAX	1310.945496	0.115035	4.124484	0.190501	5.990349	0.003496
Aurora B	179	188	YKELQKHGRF		1305.706200	IN-P	0.000000	1306.928920	0.151316	0.000000	0.000000	6.035200	0.006391
Aurora B	179	188	YKELQKHGRF		1305.706200	IN-P	3.000000	1308.499815	0.137382	1.570895	0.204378	6.015312	0.006249
Aurora B	179	188	YKELQKHGRF		1305.706200	IN-P	10.000000	1309.131104	0.101053	2.202183	0.181957	6.015147	0.009352
Aurora B	179	188	YKELQKHGRF		1305.706200	IN-P	30.000002	1309.707200	0.073898	2.778280	0.168397	6.011667	0.002601
Aurora B	179	188	YKELQKHGRF		1305.706200	IN-P	90.000008	1310.245052	0.079356	3.316131	0.170862	6.009879	0.003239
Aurora B	179	188	YKELQKHGRF		1305.706200	IN-P	300.000000	1310.435095	0.071457	3.506175	0.167340	6.016607	0.001510
Aurora B	179	188	YKELQKHGRF		1305.706200	IN-P	MAX	1310.945496	0.115035	4.016575	0.190078	5.990349	0.003496
Aurora B	179	191	YKELQKHGRFDEQ		1677.834300	all-P(astr)	0.000000	1678.609212	0.017418	0.000000	0.000000	5.757018	0.002426
Aurora B	179	191	YKELQKHGRFDEQ		1677.834300	all-P(astr)	3.000000	1681.036524	0.015331	2.427312	0.023204	5.748633	0.016486
Aurora B	179	191	YKELQKHGRFDEQ		1677.834300	all-P(astr)	10.000000	1682.125846	0.013534	3.516634	0.022058	5.739234	0.008538
Aurora B	179	191	YKELQKHGRFDEQ		1677.834300	all-P(astr)	30.000002	1682.986891	0.033763	4.377679	0.037991	5.743885	0.011510
Aurora B	179	191	YKELQKHGRFDEQ		1677.834300	all-P(astr)	90.000008	1683.501138	0.075331	4.891926	0.077319	5.733957	0.006135
Aurora B	179	191	YKELQKHGRFDEQ		1677.834300	all-P(astr)	300.000000	1683.799805	0.084230	5.190593	0.086012	5.733027	0.007343
Aurora B	179	191	YKELQKHGRFDEQ		1677.834300	all-P(astr)	MAX	1685.057307	0.173370	6.448095	0.174243	5.727602	0.006379
Aurora B	179	191	YKELQKHGRFDEQ		1677.834300	no-P(astr)	0.000000	1678.704762	0.068905	0.000000	0.000000	5.740875	0.003843
Aurora B	179	191	YKELQKHGRFDEQ		1677.834300	no-P(astr)	3.000000	1681.389510	0.122717	2.684748	0.140738	5.742511	0.006930
Aurora B	179	191	YKELQKHGRFDEQ		1677.834300	no-P(astr)	10.000000	1682.143117	0.029205	3.438354	0.074839	5.740047	0.007018
Aurora B	179	191	YKELQKHGRFDEQ		1677.834300	no-P(astr)	30.000002	1683.067385	0.197129	4.362623	0.208825	5.735023	0.010249
Aurora B	179	191	YKELQKHGRFDEQ		1677.834300	no-P(astr)	90.000008	1683.598953	0.066651	4.894191	0.095866	5.731601	0.010228
Aurora B	179	191	YKELQKHGRFDEQ		1677.834300	no-P(astr)	300.000000	1683.801092	0.253540	5.096330	0.262736	5.740707	0.001590
Aurora B	179	191	YKELQKHGRFDEQ		1677.834300	no-P(astr)	MAX	1685.057307	0.173370	6.352544	0.186561	5.727602	0.006379
Aurora B	179	191	YKELQKHGRFDEQ		1677.834300	loop-P	0.000000	1678.686845	0.086870	0.000000	0.000000	5.746604	0.003916
Aurora B	179	191	YKELQKHGRFDEQ		1677.834300	loop-P	3.000000	1681.236654	0.046140	2.549809	0.098363	5.743623	0.011161
Aurora B	179	191	YKELQKHGRFDEQ		1677.834300	loop-P	10.000000	1682.011717	0.146710	3.324872	0.170500	5.733000	0.013538
Aurora B	179	191	YKELQKHGRFDEQ		1677.834300	loop-P	30.000002	1682.884872	0.141440	4.198027	0.165987	5.736049	0.007863
Aurora B	179	191	YKELQKHGRFDEQ		1677.834300	loop-P	90.000008	1683.519070	0.058936	4.832225	0.104975	5.736852	0.008728
Aurora B	179	191	YKELQKHGRFDEQ		1677.834300	loop-P	300.000000	1683.828316	0.178852	5.141471	0.198833	5.731091	0.006029
Aurora B	179	191	YKELQKHGRFDEQ		1677.834300	loop-P	MAX	1685.057307	0.173370	6.370462	0.193916	5.727602	0.006379
Aurora B	179	191	YKELQKHGRFDEQ		1677.834300	IN-P	0.000000	1678.738872	0.123727	0.000000	0.000000	5.742195	0.005053
Aurora B	179	191	YKELQKHGRFDEQ		1677.834300	IN-P	3.000000	1681.099679	0.106785	2.360807	0.163436	5.733834	0.011096
Aurora B	179	191	YKELQKHGRFDEQ		1677.834300	IN-P	10.000000	1681.977257	0.006750	3.238386	0.123910	5.735128	0.010649
Aurora B	179	191	YKELQKHGRFDEQ		1677.834300	IN-P	30.000002	1682.685867	0.099199	3.946996	0.158583	5.731874	0.004579
Aurora B	179	191	YKELQKHGRFDEQ		1677.834300	IN-P	90.000008	1683.506699	0.125311	4.767828	0.176100	5.726717	0.003573
Aurora B	179	191	YKELQKHGRFDEQ		1677.834300	IN-P	300.000000	1683.652288	0.051250	4.913417	0.133921	5.735819	0.000548
Aurora B	179	191	YKELQKHGRFDEQ		1677.834300	IN-P	MAX	1685.057307	0.173370	6.318435	0.212991	5.727602	0.006379
Aurora B	179	195	YKELQKHGRFDEQRSAT		2093.052300	all-P(astr)	0.000000	2094.189553	0.047348	0.000000	0.000000	5.536854	0.007439
Aurora B	179	195	YKELQKHGRFDEQRSAT		2093.052300	all-P(astr)	3.000000	2097.075830	0.016211	2.886277	0.050047	5.516013	0.015625
Aurora B	179	195	YKELQKHGRFDEQRSAT		2093.052300	all-P(astr)	10.000000	2098.137832	0.063751	3.948279	0.079411	5.508011	0.006322
Aurora B	179	195	YKELQKHGRFDEQRSAT		2093.052300	all-P(astr)	30.000002	2098.996449	0.084142	4.806896	0.096549	5.515367	0.012287
Aurora B	179	195	YKELQKHGRFDEQRSAT		2093.052300	all-P(astr)	90.000008	2099.496461	0.135421	5.306908	0.143460	5.502462	0.003083
Aurora B	179	195	YKELQKHGRFDEQRSAT		2093.052300	all-P(astr)	300.000000	2099.801149	0.071339	5.611596	0.085622	5.505151	0.004560
Aurora B	179	195	YKELQKHGRFDEQRSAT		2093.052300	all-P(astr)	MAX	2103.742013	0.080313	9.552460	0.093231	5.492008	0.007499
Aurora B	179	195	YKELQKHGRFDEQRSAT		2093.052300	no-P(astr)	0.000000	2094.161589	0.037398	0.000000	0.000000	5.519570	0.004896
Aurora B	179	195	YKELQKHGRFDEQRSAT		2093.052300	no-P(astr)	3.000000	2097.368267	0.088485	3.206679	0.096063	5.509840	0.003007
Aurora B	179	195	YKELQKHGRFDEQRSAT		2093.052300	no-P(astr)	10.000000	2098.114943	0.035296	3.953355	0.051423	5.512108	0.008897
Aurora B	179	195	YKELQKHGRFDEQRSAT		2093.052300	no-P(astr)	30.000002	2099.025141	0.074933	4.863552	0.083747	5.503743	0.011128
Aurora B	179	195	YKELQKHGRFDEQRSAT		2093.052300	no-P(astr)	90.000008	2099.500378	0.050301	5.338790	0.062680	5.505455	0.007972
Aurora B	179	195	YKELQKHGRFDEQRSAT		2093.052300	no-P(astr)	300.000000	2099.812075	0.166587	5.650486	0.170734	5.509955	0.002643
Aurora B	179	195	YKELQKHGRFDEQRSAT		2093.052300	no-P(astr)	MAX	2103.742013	0.080313	9.580425	0.088593	5.492008	0.007499
Aurora B	179	195	YKELQKHGRFDEQRSAT		2093.052300	loop-P	0.000000	2094.168094	0.010697	0.000000	0.000000	5.520516	0.002945
Aurora B	179	195	YKELQKHGRFDEQRSAT		2093.052300	loop-P	3.000000	2097.236251	0.045188	3.068156	0.046437	5.513336	0.006345
Aurora B	179	195	YKELQKHGRFDEQRSAT		2093.052300	loop-P	10.000000	2098.096044	0.140979	3.927949	0.141384	5.506258	0.010888
Aurora B	179	195	YKELQKHGRFDEQRSAT		2093.052300	loop-P	30.000002	2098.891595	0.036832	4.723500	0.038354	5.504675	0.002414
Aurora B	179	195	YKELQKHGRFDEQRSAT		2093.052300	loop-P	90.000008	2099.540565	0.126643	5.372471	0.127094	5.510254	0.008955
Aurora B	179	195	YKELQKHGRFDEQRSAT		2093.052300	loop-P	300.000000	2099.740174	0.097235	5.572079	0.097822	5.504536	0.002681
Aurora B	179	195	YKELQKHGRFDEQRSAT		2093.052300	loop-P	MAX	2103.742013	0.080313	9.573919	0.081022	5.492008	0.007499
Aurora B	179	195	YKELQKHGRFDEQRSAT		2093.052300	IN-P	0.000000	2094.251359	0.062071	0.000000	0.000000	5.519102	0.006951
Aurora B	179	195	YKELQKHGRFDEQRSAT		2093.052300	IN-P	3.000000	2097.164905	0.023389	2.913546	0.066331	5.501783	0.007625
Aurora B	179	195	YKELQKHGRFDEQRSAT		2093.052300	IN-P	10.000000	2098.006395	0.052205	3.755036	0.081106	5.500579	0.010163
Aurora B	179	195	YKELQKHGRFDEQRSAT		2093.052300	IN-P	30.000002	2098.852155	0.050490	4.600796	0.080012	5.502013	0.008005
Aurora B	179	195	YKELQKHGRFDEQRSAT		2093.052300	IN-P	90.000008	2099.436963	0.051059	5.185604	0.080373	5.498210	0.006529
Aurora B	179	195	YKELQKHGRFDEQRSAT		2093.052300	IN-P	300.000000	2099.707339	0.156321	5.455980	0.168194	5.503763	0.003736
Aurora B	179	195	YKELQKHGRFDEQRSAT		2093.052300	IN-P	MAX	2103.742013	0.080313	9.490655	0.101503	5.492008	0.007499
Aurora B	179	196	YKELQKHGRFDEQRSATF		2240.120700	all-P(astr)	0.000000	2241.520866	0.054447	0.000000	0.000000	6.753664	0.004723
Aurora B	179	196	YKELQKHGRFDEQRSATF		2240.120700	all-P(astr)	3.000000	2244.082780	0.086367	2.561914	0.102097	6.737069	0.018996
Aurora B	179	196	YKELQKHGRFDEQRSATF		2240.120700	all-P(astr)	10.000000	2245.035779	0.062522	3.514913	0.082907	6.729029	0.011761
Aurora B	179	196	YKELQKHGRFDEQRSATF		2240.120700	all-P(astr)	30.000002	2245.807007	0.077339	4.286142	0.094582	6.738891	0.017463
Aurora B	179	196	YKELQKHGRFDEQRSATF		2240.120700	all-P(astr)	90.000008	2246.289466	0.121750	4.768600	0.133370	6.726599	0.008596
Aurora B	179	196	YKELQKHGRFDEQRSATF		2240.120700	all-P(astr)	300.000000	2246.644624	0.050829	5.123758	0.074485	6.727964	0.010401
Aurora B	179	196	YKELQKHGRFDEQRSATF		2240.120700	all-P(astr)	MAX	2251.144920	0.061371	9.624054	0.082042	6.720094	0.002332
Aurora B	179	196	YKELQKHGRFDEQRSATF		2240.120700	no-P(astr)	0.000000	2241.506291	0.070173	0.000000	0.000000	6.743357	0.006639
Aurora B	179	196	YKELQKHGRFDEQRSATF		2240.120700	no-P(astr)	3.000000	2244.339426	0.068075	2.833135	0.097767	6.741638	0.003236
Aurora B	179	196	YKELQKHGRFDEQRSATF		2240.120700	no-P(astr)	10.000000	2245.010223	0.013913	3.503932	0.071539	6.736691	0.015346
Aurora B	179	196	YKELQKHGRFDEQRSATF		2240.120700	no-P(astr)	30.000002	2245.764778	0.089375	4.258486	0.113631	6.727918	0.014137
Aurora B	179	196	YKELQKHGRFDEQRSATF		2240.120700	no-P(astr)	90.000008	2246.221972	0.509378	4.715681	0.514189	6.723691	0.013529
Aurora B	179	196	YKELQKHGRFDEQRSATF		2240.120700	no-P(astr)	300.000000	2246.537574	0.535596	5.031283	0.540173	6.735387	0.006529
Aurora B	179	196	YKELQKHGRFDEQRSATF		2240.120700	no-P(astr)	MAX	2251.169070	0.068597	9.662779	0.098131	6.717114	0.005675
Aurora B	179	196	YKELQKHGRFDEQRSATF		2240.120700	loop-P	0.000000	2241.499676	0.064187	0.000000	0.000000	6.735094	0.004254
Aurora B	179	196	YKELQKHGRFDEQRSATF		2240.120700	loop-P	3.000000	2244.308936	0.056012	2.809261	0.085190	6.736440	0.012439
Aurora B	179	196	YKELQKHGRFDEQRSATF		2240.120700	loop-P	10.000000	2245.028001	0.045324	3.528326	0.078576	6.733092	0.018634
Aurora B	179	196	YKELQKHGRFDEQRSATF		2240.120700	loop-P	30.000002	2245.724570	0.049144	4.224895	0.080840	6.732664	0.013935
Aurora B	179	196	YKELQKHGRFDEQRSATF		2240.120700	loop-P	90.000008	2246.234928	0.040453	4.735252	0.075871	6.732897	0.014803
Aurora B	179	196	YKELQKHGRFDEQRSATF		2240.120700	loop-P	300.000000	2246.480169	0.070507	4.980493	0.095348	6.727618	0.008091
Aurora B	179	196	YKELQKHGRFDEQRSATF		2240.120700	loop-P	MAX	2251.169070	0.068597	9.669395	0.093944	6.717114	0.005675
Aurora B	179	196	YKELQKHGRFDEQRSATF		2240.120700	IN-P	0.000000	2241.581243	0.086146	0.000000	0.000000	6.733817	0.003490
Aurora B	179	196	YKELQKHGRFDEQRSATF		2240.120700	IN-P	3.000000	2244.164065	0.029077	2.582822	0.090920	6.725544	0.009166
Aurora B	179	196	YKELQKHGRFDEQRSATF		2240.120700	IN-P	10.000000	2244.924507	0.040403	3.343264	0.095150	6.727899	0.013851
Aurora B	179	196	YKELQKHGRFDEQRSATF		2240.120700	IN-P	30.000002	2245.704226	0.032241	4.122983	0.091981	6.725977	0.008453
Aurora B	179	196	YKELQKHGRFDEQRSATF		2240.120700	IN-P	90.000008	2246.335185	0.062803	4.753942	0.106608	6.721097	0.009284
Aurora B	179	196	YKELQKHGRFDEQRSATF		2240.120700	IN-P	300.000000	2246.470862	0.110184	4.889619	0.139863	6.727006	0.008700
Aurora B	179	196	YKELQKHGRFDEQRSATF		2240.120700	IN-P	MAX	2251.112398	0.050506	9.531155	0.099859	6.719436	0.002631
Aurora B	181	188	ELQKHGRF		1014.547900	all-P(astr)	0.000000	1015.024705	0.027578	0.000000	0.000000	6.052437	0.002511
Aurora B	181	188	ELQKHGRF		1014.547900	all-P(astr)	3.000000	1016.436584	0.085806	1.411880	0.090129	6.023408	0.015041
Aurora B	181	188	ELQKHGRF		1014.547900	all-P(astr)	10.000000	1017.212674	0.074649	2.187969	0.079580	6.017007	0.004365
Aurora B	181	188	ELQKHGRF		1014.547900	all-P(astr)	30.000002	1017.820723	0.080265	2.796018	0.084871	6.024096	0.010329
Aurora B	181	188	ELQKHGRF		1014.547900	all-P(astr)	90.000008	1018.260106	0.088342	3.235402	0.092547	6.012355	0.002719
Aurora B	181	188	ELQKHGRF		1014.547900	all-P(astr)	300.000000	1018.473686	0.097700	3.448981	0.101518	6.014664	0.001189
Aurora B	181	188	ELQKHGRF		1014.547900	all-P(astr)	MAX	1018.838491	0.105448	3.813786	0.108995	5.992615	0.005071
Aurora B	181	188	ELQKHGRF		1014.547900	no-P(astr)	0.000000	1015.026787	0.045057	0.000000	0.000000	6.035891	0.004808
Aurora B	181	188	ELQKHGRF		1014.547900	no-P(astr)	3.000000	1016.610695	0.126940	1.583908	0.134699	6.027985	0.002308
Aurora B	181	188	ELQKHGRF		1014.547900	no-P(astr)	10.000000	1017.201711	0.075151	2.174924	0.087623	6.029946	0.004983
Aurora B	181	188	ELQKHGRF		1014.547900	no-P(astr)	30.000002	1017.796669	0.100976	2.769882	0.110572	6.020721	0.008785
Aurora B	181	188	ELQKHGRF		1014.547900	no-P(astr)	90.000008	1018.239651	0.095594	3.212864	0.105680	6.019363	0.007753
Aurora B	181	188	ELQKHGRF		1014.547900	no-P(astr)	300.000000	1018.475524	0.083906	3.448738	0.095238	6.025332	0.001674
Aurora B	181	188	ELQKHGRF		1014.547900	no-P(astr)	MAX	1018.838491	0.105448	3.811704	0.114671	5.992615	0.005071
Aurora B	181	188	ELQKHGRF		1014.547900	loop-P	0.000000	1015.037909	0.049346	0.000000	0.000000	6.033464	0.003437
Aurora B	181	188	ELQKHGRF		1014.547900	loop-P	3.000000	1016.496373	0.066811	1.458464	0.083059	6.026884	0.004562
Aurora B	181	188	ELQKHGRF		1014.547900	loop-P	10.000000	1017.130347	0.126185	2.092438	0.135490	6.027809	0.015180
Aurora B	181	188	ELQKHGRF		1014.547900	loop-P	30.000002	1017.835830	0.092912	2.797921	0.105203	6.019569	0.004962
Aurora B	181	188	ELQKHGRF		1014.547900	loop-P	90.000008	1018.197626	0.093325	3.159717	0.105568	6.025247	0.008358
Aurora B	181	188	ELQKHGRF		1014.547900	loop-P	300.000000	1018.481442	0.133079	3.443533	0.141933	6.014352	0.000996
Aurora B	181	188	ELQKHGRF		1014.547900	loop-P	MAX	1018.838491	0.105448	3.800582	0.116423	5.992615	0.005071
Aurora B	181	188	ELQKHGRF		1014.547900	IN-P	0.000000	1015.132104	0.046475	0.000000	0.000000	6.038151	0.005337
Aurora B	181	188	ELQKHGRF		1014.547900	IN-P	3.000000	1016.462298	0.040005	1.330193	0.061322	6.019144	0.007814
Aurora B	181	188	ELQKHGRF		1014.547900	IN-P	10.000000	1017.088287	0.067703	1.956183	0.082120	6.020345	0.008791
Aurora B	181	188	ELQKHGRF		1014.547900	IN-P	30.000002	1017.720934	0.046623	2.588829	0.065830	6.013909	0.003490
Aurora B	181	188	ELQKHGRF		1014.547900	IN-P	90.000008	1018.199429	0.073997	3.067324	0.087381	6.010719	0.001638
Aurora B	181	188	ELQKHGRF		1014.547900	IN-P	300.000000	1018.367187	0.053811	3.235083	0.071102	6.019351	0.002581
Aurora B	181	188	ELQKHGRF		1014.547900	IN-P	MAX	1018.838491	0.105448	3.706386	0.115235	5.992615	0.005071
Aurora B	183	188	QKHGRF		772.421300	all-P(astr)	0.000000	772.702177	0.004687	0.000000	0.000000	6.049397	0.001271
Aurora B	183	188	QKHGRF		772.421300	all-P(astr)	3.000000	773.833537	0.053129	1.131360	0.053335	6.021196	0.015155
Aurora B	183	188	QKHGRF		772.421300	all-P(astr)	10.000000	774.440362	0.009190	1.738185	0.010316	6.020497	0.004540
Aurora B	183	188	QKHGRF		772.421300	all-P(astr)	30.000002	775.024931	0.136248	2.322755	0.136329	6.025682	0.008600
Aurora B	183	188	QKHGRF		772.421300	all-P(astr)	90.000008	775.360607	0.000000	2.658430	0.004687	6.019036	0.000000
Aurora B	183	188	QKHGRF		772.421300	all-P(astr)	300.000000	775.571791	0.140283	2.869614	0.140361	6.017305	0.003342
Aurora B	183	188	QKHGRF		772.421300	all-P(astr)	MAX	775.987102	0.002581	3.284925	0.005350	5.992645	0.004740
Aurora B	183	188	QKHGRF		772.421300	no-P(astr)	0.000000	772.729773	0.022478	0.000000	0.000000	6.040998	0.000748
Aurora B	183	188	QKHGRF		772.421300	no-P(astr)	3.000000	773.899079	0.025797	1.169306	0.034216	6.030105	0.001645
Aurora B	183	188	QKHGRF		772.421300	no-P(astr)	10.000000	774.470292	0.040912	1.740519	0.046680	6.025994	0.004727
Aurora B	183	188	QKHGRF		772.421300	no-P(astr)	30.000002	775.125273	0.047106	2.395500	0.052194	6.019323	0.009578
Aurora B	183	188	QKHGRF		772.421300	no-P(astr)	90.000008	775.456788	0.011111	2.727015	0.025074	6.018307	0.009579
Aurora B	183	188	QKHGRF		772.421300	no-P(astr)	300.000000	775.689152	0.086626	2.959379	0.089495	6.026698	0.000744
Aurora B	183	188	QKHGRF		772.421300	no-P(astr)	MAX	775.987102	0.002581	3.257329	0.022625	5.992645	0.004740
Aurora B	183	188	QKHGRF		772.421300	loop-P	0.000000	772.682212	0.032201	0.000000	0.000000	6.034510	0.001673
Aurora B	183	188	QKHGRF		772.421300	loop-P	3.000000	773.903495	0.046142	1.221283	0.056267	6.023793	0.005212
Aurora B	183	188	QKHGRF		772.421300	loop-P	10.000000	774.493220	0.041488	1.811008	0.052518	6.023795	0.012654
Aurora B	183	188	QKHGRF		772.421300	loop-P	30.000002	775.087149	0.092512	2.404937	0.097956	6.018711	0.004426
Aurora B	183	188	QKHGRF		772.421300	loop-P	90.000008	775.342167	0.002854	2.659955	0.032327	6.019411	0.008360
Aurora B	183	188	QKHGRF		772.421300	loop-P	300.000000	775.531625	0.041580	2.849413	0.052591	6.017169	0.000858
Aurora B	183	188	QKHGRF		772.421300	loop-P	MAX	775.987102	0.002581	3.304890	0.032304	5.992645	0.004740
Aurora B	183	188	QKHGRF		772.421300	IN-P	0.000000	772.726332	0.036773	0.000000	0.000000	6.037032	0.006486
Aurora B	183	188	QKHGRF		772.421300	IN-P	3.000000	773.908401	0.070841	1.182069	0.079817	6.019271	0.008836
Aurora B	183	188	QKHGRF		772.421300	IN-P	10.000000	774.470647	0.101435	1.744315	0.107895	6.019667	0.008773
Aurora B	183	188	QKHGRF		772.421300	IN-P	30.000002	774.966110	0.020712	2.239778	0.042205	6.011778	0.002566
Aurora B	183	188	QKHGRF		772.421300	IN-P	90.000008	775.371858	0.037885	2.645526	0.052797	6.010902	0.001189
Aurora B	183	188	QKHGRF		772.421300	IN-P	300.000000	775.540712	0.073353	2.814380	0.082055	6.016592	5.608451E-5
Aurora B	183	188	QKHGRF		772.421300	IN-P	MAX	775.987102	0.002581	3.260770	0.036863	5.992645	0.004740
Aurora B	189	195	DEQRSAT		806.363900	all-P(astr)	0.000000	806.736552	0.048295	0.000000	0.000000	2.582029	0.001509
Aurora B	189	195	DEQRSAT		806.363900	all-P(astr)	3.000000	808.295848	0.039244	1.559295	0.062229	2.586511	0.001698
Aurora B	189	195	DEQRSAT		806.363900	all-P(astr)	10.000000	808.543629	0.047425	1.807077	0.067687	2.586307	0.003301
Aurora B	189	195	DEQRSAT		806.363900	all-P(astr)	30.000002	808.570098	0.025396	1.833546	0.054565	2.584735	0.002255
Aurora B	189	195	DEQRSAT		806.363900	all-P(astr)	90.000008	808.523632	0.018456	1.787080	0.051701	2.586422	0.001133
Aurora B	189	195	DEQRSAT		806.363900	all-P(astr)	300.000000	808.547218	0.020813	1.810666	0.052589	2.588586	0.003736
Aurora B	189	195	DEQRSAT		806.363900	all-P(astr)	MAX	810.815868	0.055692	4.079315	0.073715	2.591774	0.001161
Aurora B	189	195	DEQRSAT		806.363900	no-P(astr)	0.000000	806.719249	0.035473	0.000000	0.000000	2.582962	0.002221
Aurora B	189	195	DEQRSAT		806.363900	no-P(astr)	3.000000	808.507100	0.017549	1.787852	0.039576	2.585249	0.004164
Aurora B	189	195	DEQRSAT		806.363900	no-P(astr)	10.000000	808.482088	0.042295	1.762840	0.055202	2.587320	0.001813
Aurora B	189	195	DEQRSAT		806.363900	no-P(astr)	30.000002	808.510067	0.031263	1.790818	0.047283	2.586722	0.001785
Aurora B	189	195	DEQRSAT		806.363900	no-P(astr)	90.000008	808.558854	0.034238	1.839605	0.049301	2.586572	0.002915
Aurora B	189	195	DEQRSAT		806.363900	no-P(astr)	300.000000	808.537272	0.033788	1.818023	0.048989	2.588239	0.003812
Aurora B	189	195	DEQRSAT		806.363900	no-P(astr)	MAX	810.815868	0.055692	4.096619	0.066029	2.591774	0.001161
Aurora B	189	195	DEQRSAT		806.363900	loop-P	0.000000	806.733107	0.050263	0.000000	0.000000	2.585833	0.003201
Aurora B	189	195	DEQRSAT		806.363900	loop-P	3.000000	808.510486	0.037066	1.777379	0.062452	2.587296	0.003272
Aurora B	189	195	DEQRSAT		806.363900	loop-P	10.000000	808.556906	0.089251	1.823799	0.102431	2.588353	0.001450
Aurora B	189	195	DEQRSAT		806.363900	loop-P	30.000002	808.524599	0.039189	1.791492	0.063735	2.588444	0.001020
Aurora B	189	195	DEQRSAT		806.363900	loop-P	90.000008	808.488688	0.039862	1.755581	0.064151	2.586375	0.001434
Aurora B	189	195	DEQRSAT		806.363900	loop-P	300.000000	808.508812	0.022792	1.775705	0.055189	2.588166	0.001561
Aurora B	189	195	DEQRSAT		806.363900	loop-P	MAX	810.815868	0.055692	4.082760	0.075019	2.591774	0.001161
Aurora B	189	195	DEQRSAT		806.363900	IN-P	0.000000	806.817893	0.076307	0.000000	0.000000	2.585891	0.001577
Aurora B	189	195	DEQRSAT		806.363900	IN-P	3.000000	808.449279	0.030823	1.631386	0.082297	2.587421	0.001675
Aurora B	189	195	DEQRSAT		806.363900	IN-P	10.000000	808.571561	0.053070	1.753669	0.092947	2.588729	0.004829
Aurora B	189	195	DEQRSAT		806.363900	IN-P	30.000002	808.561219	0.055209	1.743326	0.094185	2.587379	0.001398
Aurora B	189	195	DEQRSAT		806.363900	IN-P	90.000008	808.574307	0.020872	1.756414	0.079110	2.588829	0.002736
Aurora B	189	195	DEQRSAT		806.363900	IN-P	300.000000	808.552552	0.015526	1.734659	0.077870	2.590685	0.000543
Aurora B	189	195	DEQRSAT		806.363900	IN-P	MAX	810.815868	0.055692	3.997975	0.094468	2.591774	0.001161
Aurora B	189	196	DEQRSATF		953.432300	all-P(astr)	0.000000	954.194656	0.077257	0.000000	0.000000	6.635071	0.002588
Aurora B	189	196	DEQRSATF		953.432300	all-P(astr)	3.000000	955.508111	0.071602	1.313455	0.105335	6.633457	0.021848
Aurora B	189	196	DEQRSATF		953.432300	all-P(astr)	10.000000	955.728416	0.075479	1.533760	0.108008	6.630875	0.016731
Aurora B	189	196	DEQRSATF		953.432300	all-P(astr)	30.000002	955.766514	0.060353	1.571858	0.098037	6.637401	0.023200
Aurora B	189	196	DEQRSATF		953.432300	all-P(astr)	90.000008	955.786760	0.068796	1.592104	0.103448	6.626380	0.009160
Aurora B	189	196	DEQRSATF		953.432300	all-P(astr)	300.000000	955.792355	0.066601	1.597699	0.102002	6.630346	0.012030
Aurora B	189	196	DEQRSATF		953.432300	all-P(astr)	MAX	958.632849	0.052260	4.438194	0.093273	6.638808	0.002682
Aurora B	189	196	DEQRSATF		953.432300	no-P(astr)	0.000000	954.154202	0.063543	0.000000	0.000000	6.620439	0.002936
Aurora B	189	196	DEQRSATF		953.432300	no-P(astr)	3.000000	955.676707	0.048667	1.522504	0.080039	6.635496	0.008712
Aurora B	189	196	DEQRSATF		953.432300	no-P(astr)	10.000000	955.667246	0.042204	1.513043	0.076281	6.638583	0.016678
Aurora B	189	196	DEQRSATF		953.432300	no-P(astr)	30.000002	955.709120	0.056979	1.554918	0.085348	6.632770	0.019182
Aurora B	189	196	DEQRSATF		953.432300	no-P(astr)	90.000008	955.786685	0.071686	1.632483	0.095794	6.632138	0.019972
Aurora B	189	196	DEQRSATF		953.432300	no-P(astr)	300.000000	955.739287	0.111764	1.585085	0.128565	6.634827	0.015837
Aurora B	189	196	DEQRSATF		953.432300	no-P(astr)	MAX	958.632849	0.052260	4.478647	0.082273	6.638808	0.002682
Aurora B	189	196	DEQRSATF		953.432300	loop-P	0.000000	954.210464	0.089201	0.000000	0.000000	6.621943	0.002634
Aurora B	189	196	DEQRSATF		953.432300	loop-P	3.000000	955.616930	0.055624	1.406467	0.105123	6.632180	0.012028
Aurora B	189	196	DEQRSATF		953.432300	loop-P	10.000000	955.676921	0.054508	1.466457	0.104537	6.628500	0.018934
Aurora B	189	196	DEQRSATF		953.432300	loop-P	30.000002	955.661381	0.032780	1.450917	0.095033	6.629472	0.013927
Aurora B	189	196	DEQRSATF		953.432300	loop-P	90.000008	955.656725	0.032182	1.446261	0.094829	6.637385	0.015777
Aurora B	189	196	DEQRSATF		953.432300	loop-P	300.000000	955.666191	0.074690	1.455728	0.116342	6.630880	0.011111
Aurora B	189	196	DEQRSATF		953.432300	loop-P	MAX	958.632849	0.052260	4.422386	0.103382	6.638808	0.002682
Aurora B	189	196	DEQRSATF		953.432300	IN-P	0.000000	954.277016	0.155570	0.000000	0.000000	6.629861	0.004424
Aurora B	189	196	DEQRSATF		953.432300	IN-P	3.000000	955.612938	0.080358	1.335921	0.175098	6.627278	0.015108
Aurora B	189	196	DEQRSATF		953.432300	IN-P	10.000000	955.711745	0.055920	1.434728	0.165315	6.627155	0.016906
Aurora B	189	196	DEQRSATF		953.432300	IN-P	30.000002	955.740541	0.076247	1.463525	0.173250	6.624599	0.013401
Aurora B	189	196	DEQRSATF		953.432300	IN-P	90.000008	955.767685	0.103103	1.490668	0.186634	6.620470	0.015231
Aurora B	189	196	DEQRSATF		953.432300	IN-P	300.000000	955.776925	0.075554	1.499909	0.172946	6.633423	0.017389
Aurora B	189	196	DEQRSATF		953.432300	IN-P	MAX	958.632849	0.052260	4.355833	0.164113	6.638808	0.002682
Aurora B	189	197	DEQRSATFM		1084.472800	all-P(astr)	0.000000	1085.029086	0.026253	0.000000	0.000000	7.752125	0.001934
Aurora B	189	197	DEQRSATFM		1084.472800	all-P(astr)	3.000000	1086.361130	0.017505	1.332044	0.031554	7.765136	0.038737
Aurora B	189	197	DEQRSATFM		1084.472800	all-P(astr)	10.000000	1086.558821	0.058863	1.529735	0.064452	7.763497	0.032297
Aurora B	189	197	DEQRSATFM		1084.472800	all-P(astr)	30.000002	1086.549511	0.032983	1.520424	0.042156	7.771790	0.036299
Aurora B	189	197	DEQRSATFM		1084.472800	all-P(astr)	90.000008	1086.591924	0.023793	1.562838	0.035431	7.764957	0.030106
Aurora B	189	197	DEQRSATFM		1084.472800	all-P(astr)	300.000000	1086.625238	0.021127	1.596152	0.033699	7.764965	0.032616
Aurora B	189	197	DEQRSATFM		1084.472800	all-P(astr)	MAX	1090.516542	0.043572	5.487455	0.050870	7.784237	0.001964
Aurora B	189	197	DEQRSATFM		1084.472800	no-P(astr)	0.000000	1085.059137	0.010178	0.000000	0.000000	7.742827	0.004785
Aurora B	189	197	DEQRSATFM		1084.472800	no-P(astr)	3.000000	1086.469736	0.012515	1.410598	0.016131	7.774790	0.022151
Aurora B	189	197	DEQRSATFM		1084.472800	no-P(astr)	10.000000	1086.556686	0.026934	1.497549	0.028793	7.769023	0.032574
Aurora B	189	197	DEQRSATFM		1084.472800	no-P(astr)	30.000002	1086.571358	0.020376	1.512221	0.022777	7.765038	0.031530
Aurora B	189	197	DEQRSATFM		1084.472800	no-P(astr)	90.000008	1086.626830	0.024381	1.567692	0.026420	7.768082	0.033707
Aurora B	189	197	DEQRSATFM		1084.472800	no-P(astr)	300.000000	1086.592176	0.036792	1.533038	0.038174	7.770836	0.028309
Aurora B	189	197	DEQRSATFM		1084.472800	no-P(astr)	MAX	1090.516542	0.043572	5.457404	0.044745	7.784237	0.001964
Aurora B	189	197	DEQRSATFM		1084.472800	loop-P	0.000000	1085.117373	0.011684	0.000000	0.000000	7.742079	0.004043
Aurora B	189	197	DEQRSATFM		1084.472800	loop-P	3.000000	1086.565459	0.026265	1.448087	0.028746	7.770382	0.030615
Aurora B	189	197	DEQRSATFM		1084.472800	loop-P	10.000000	1086.527092	0.065329	1.409719	0.066365	7.770883	0.037744
Aurora B	189	197	DEQRSATFM		1084.472800	loop-P	30.000002	1086.596411	0.019753	1.479039	0.022950	7.768627	0.030624
Aurora B	189	197	DEQRSATFM		1084.472800	loop-P	90.000008	1086.556370	0.045358	1.438998	0.046839	7.771222	0.032023
Aurora B	189	197	DEQRSATFM		1084.472800	loop-P	300.000000	1086.531615	0.033580	1.414242	0.035555	7.765263	0.028523
Aurora B	189	197	DEQRSATFM		1084.472800	loop-P	MAX	1090.516542	0.043572	5.399169	0.045111	7.784237	0.001964
Aurora B	189	197	DEQRSATFM		1084.472800	IN-P	0.000000	1085.077820	0.046929	0.000000	0.000000	7.747360	0.005263
Aurora B	189	197	DEQRSATFM		1084.472800	IN-P	3.000000	1086.486778	0.022460	1.408958	0.052026	7.765985	0.029968
Aurora B	189	197	DEQRSATFM		1084.472800	IN-P	10.000000	1086.590583	0.025503	1.512763	0.053411	7.768187	0.033637
Aurora B	189	197	DEQRSATFM		1084.472800	IN-P	30.000002	1086.623664	0.016268	1.545845	0.049669	7.762516	0.025809
Aurora B	189	197	DEQRSATFM		1084.472800	IN-P	90.000008	1086.612477	0.030716	1.534657	0.056087	7.759637	0.027941
Aurora B	189	197	DEQRSATFM		1084.472800	IN-P	300.000000	1086.602805	0.059178	1.524986	0.075528	7.764288	0.026986
Aurora B	189	197	DEQRSATFM		1084.472800	IN-P	MAX	1090.516542	0.043572	5.438722	0.064038	7.784237	0.001964
Aurora B	191	196	QRSATF		709.362800	all-P(astr)	0.000000	709.611370	0.031256	0.000000	0.000000	6.639740	0.008917
Aurora B	191	196	QRSATF		709.362800	all-P(astr)	3.000000	710.671423	0.009458	1.060053	0.032656	6.628561	0.022176
Aurora B	191	196	QRSATF		709.362800	all-P(astr)	10.000000	710.941419	0.000450	1.330049	0.031260	6.624575	0.011341
Aurora B	191	196	QRSATF		709.362800	all-P(astr)	30.000002	710.841297	0.011387	1.229927	0.033266	6.631839	0.017064
Aurora B	191	196	QRSATF		709.362800	all-P(astr)	90.000008	710.864147	0.035361	1.252777	0.047195	6.621863	0.004589
Aurora B	191	196	QRSATF		709.362800	all-P(astr)	300.000000	710.832873	0.008634	1.221504	0.032427	6.621778	0.008619
Aurora B	191	196	QRSATF		709.362800	all-P(astr)	MAX	713.220694	0.071449	3.609324	0.077986	6.633738	0.001285
Aurora B	191	196	QRSATF		709.362800	no-P(astr)	0.000000	709.631721	0.013278	0.000000	0.000000	6.627476	0.011304
Aurora B	191	196	QRSATF		709.362800	no-P(astr)	3.000000	710.773836	0.010008	1.142115	0.016627	6.633219	0.010500
Aurora B	191	196	QRSATF		709.362800	no-P(astr)	10.000000	710.800029	0.079831	1.168308	0.080928	6.631585	0.012520
Aurora B	191	196	QRSATF		709.362800	no-P(astr)	30.000002	710.766924	0.000695	1.135203	0.013296	6.629288	0.018454
Aurora B	191	196	QRSATF		709.362800	no-P(astr)	90.000008	710.811425	0.011639	1.179704	0.017657	6.627986	0.016650
Aurora B	191	196	QRSATF		709.362800	no-P(astr)	300.000000	710.840479	0.014182	1.208758	0.019428	6.630797	0.011577
Aurora B	191	196	QRSATF		709.362800	no-P(astr)	MAX	713.220694	0.071449	3.588973	0.072672	6.633738	0.001285
Aurora B	191	196	QRSATF		709.362800	loop-P	0.000000	709.580911	0.043566	0.000000	0.000000	6.627946	0.002354
Aurora B	191	196	QRSATF		709.362800	loop-P	3.000000	710.823020	0.089788	1.242109	0.099799	6.630993	0.009705
Aurora B	191	196	QRSATF		709.362800	loop-P	10.000000	710.811187	0.007908	1.230276	0.044278	6.628643	0.018832
Aurora B	191	196	QRSATF		709.362800	loop-P	30.000002	710.836599	0.014236	1.255687	0.045832	6.626883	0.009827
Aurora B	191	196	QRSATF		709.362800	loop-P	90.000008	710.816382	0.020819	1.235470	0.048285	6.634848	0.012084
Aurora B	191	196	QRSATF		709.362800	loop-P	300.000000	710.764791	0.032581	1.183879	0.054401	6.627410	0.014873
Aurora B	191	196	QRSATF		709.362800	loop-P	MAX	713.220694	0.071449	3.639783	0.083683	6.633738	0.001285
Aurora B	191	196	QRSATF		709.362800	IN-P	0.000000	709.672149	0.009176	0.000000	0.000000	6.630727	0.002464
Aurora B	191	196	QRSATF		709.362800	IN-P	3.000000	710.805058	0.021020	1.132910	0.022936	6.622157	0.015789
Aurora B	191	196	QRSATF		709.362800	IN-P	10.000000	710.934965	0.002875	1.262816	0.009616	6.626000	0.013650
Aurora B	191	196	QRSATF		709.362800	IN-P	30.000002	710.912927	0.053846	1.240778	0.054622	6.622156	0.008520
Aurora B	191	196	QRSATF		709.362800	IN-P	90.000008	710.896412	0.006341	1.224263	0.011154	6.617946	0.008764
Aurora B	191	196	QRSATF		709.362800	IN-P	300.000000	710.902846	0.004631	1.230697	0.010278	6.632776	0.017734
Aurora B	191	196	QRSATF		709.362800	IN-P	MAX	713.220694	0.071449	3.548545	0.072035	6.633738	0.001285
Aurora B	196	199	FMEE		555.211900	all-P(astr)	0.000000	555.532858	0.022198	0.000000	0.000000	6.686789	0.002810
Aurora B	196	199	FMEE		555.211900	all-P(astr)	3.000000	555.697275	0.008183	0.164416	0.023658	6.705914	0.035961
Aurora B	196	199	FMEE		555.211900	all-P(astr)	10.000000	555.670764	0.015226	0.137906	0.026918	6.702504	0.028712
Aurora B	196	199	FMEE		555.211900	all-P(astr)	30.000002	555.677754	0.010580	0.144895	0.024590	6.712035	0.033110
Aurora B	196	199	FMEE		555.211900	all-P(astr)	90.000008	555.683020	0.010793	0.150161	0.024683	6.699681	0.026297
Aurora B	196	199	FMEE		555.211900	all-P(astr)	300.000000	555.689370	0.040416	0.156512	0.046111	6.698967	0.026395
Aurora B	196	199	FMEE		555.211900	all-P(astr)	MAX	556.792839	0.026780	1.259981	0.034784	6.730324	0.004115
Aurora B	196	199	FMEE		555.211900	no-P(astr)	0.000000	555.510663	0.025128	0.000000	0.000000	6.674318	0.003115
Aurora B	196	199	FMEE		555.211900	no-P(astr)	3.000000	555.666347	0.010337	0.155684	0.027171	6.708460	0.024256
Aurora B	196	199	FMEE		555.211900	no-P(astr)	10.000000	555.672844	0.012871	0.162181	0.028233	6.707942	0.028922
Aurora B	196	199	FMEE		555.211900	no-P(astr)	30.000002	555.660827	0.016431	0.150164	0.030024	6.700591	0.030275
Aurora B	196	199	FMEE		555.211900	no-P(astr)	90.000008	555.689221	0.011436	0.178557	0.027608	6.701396	0.030623
Aurora B	196	199	FMEE		555.211900	no-P(astr)	300.000000	555.703094	0.056284	0.192431	0.061638	6.709834	0.025543
Aurora B	196	199	FMEE		555.211900	no-P(astr)	MAX	556.792839	0.026780	1.282176	0.036723	6.730324	0.004115
Aurora B	196	199	FMEE		555.211900	loop-P	0.000000	555.561639	0.024811	0.000000	0.000000	6.679343	0.000782
Aurora B	196	199	FMEE		555.211900	loop-P	3.000000	555.641108	0.038286	0.079469	0.045622	6.710153	0.030039
Aurora B	196	199	FMEE		555.211900	loop-P	10.000000	555.632528	0.009401	0.070889	0.026533	6.707407	0.035461
Aurora B	196	199	FMEE		555.211900	loop-P	30.000002	555.654348	0.006264	0.092709	0.025590	6.706793	0.026943
Aurora B	196	199	FMEE		555.211900	loop-P	90.000008	555.678322	0.006904	0.116683	0.025754	6.708564	0.028987
Aurora B	196	199	FMEE		555.211900	loop-P	300.000000	555.676174	0.019531	0.114535	0.031576	6.702281	0.024811
Aurora B	196	199	FMEE		555.211900	loop-P	MAX	556.792839	0.026780	1.231200	0.036507	6.730324	0.004115
Aurora B	196	199	FMEE		555.211900	IN-P	0.000000	555.603066	0.006212	0.000000	0.000000	6.680167	0.003019
Aurora B	196	199	FMEE		555.211900	IN-P	3.000000	555.744199	0.005677	0.141134	0.008415	6.700368	0.028583
Aurora B	196	199	FMEE		555.211900	IN-P	10.000000	555.726603	0.024663	0.123537	0.025433	6.700284	0.031911
Aurora B	196	199	FMEE		555.211900	IN-P	30.000002	555.771470	0.033821	0.168404	0.034387	6.702264	0.024667
Aurora B	196	199	FMEE		555.211900	IN-P	90.000008	555.740187	0.048447	0.137122	0.048844	6.696871	0.025015
Aurora B	196	199	FMEE		555.211900	IN-P	300.000000	555.741118	0.009169	0.138053	0.011076	6.704603	0.027248
Aurora B	196	199	FMEE		555.211900	IN-P	MAX	556.792839	0.026780	1.189774	0.027491	6.730324	0.004115
Aurora B	196	200	FMEEL		668.296000	all-P(astr)	0.000000	668.621430	0.016965	0.000000	0.000000	9.083800	0.006636
Aurora B	196	200	FMEEL		668.296000	all-P(astr)	3.000000	668.754681	0.011133	0.133251	0.020292	9.108420	0.051262
Aurora B	196	200	FMEEL		668.296000	all-P(astr)	10.000000	668.754536	0.005435	0.133106	0.017815	9.114303	0.045632
Aurora B	196	200	FMEEL		668.296000	all-P(astr)	30.000002	668.746102	0.003658	0.124672	0.017355	9.128246	0.048521
Aurora B	196	200	FMEEL		668.296000	all-P(astr)	90.000008	668.761411	0.014168	0.139981	0.022104	9.117792	0.039313
Aurora B	196	200	FMEEL		668.296000	all-P(astr)	300.000000	668.777079	0.021572	0.155649	0.027444	9.116828	0.043732
Aurora B	196	200	FMEEL		668.296000	all-P(astr)	MAX	670.810726	0.014682	2.189296	0.022436	9.168952	0.002216
Aurora B	196	200	FMEEL		668.296000	no-P(astr)	0.000000	668.678033	0.023961	0.000000	0.000000	9.080364	0.003881
Aurora B	196	200	FMEEL		668.296000	no-P(astr)	3.000000	668.736039	0.008613	0.058006	0.025462	9.132968	0.024963
Aurora B	196	200	FMEEL		668.296000	no-P(astr)	10.000000	668.755788	0.003485	0.077755	0.024213	9.121536	0.044347
Aurora B	196	200	FMEEL		668.296000	no-P(astr)	30.000002	668.748390	0.007838	0.070357	0.025211	9.117948	0.047653
Aurora B	196	200	FMEEL		668.296000	no-P(astr)	90.000008	668.772119	0.005778	0.094086	0.024648	9.120239	0.045459
Aurora B	196	200	FMEEL		668.296000	no-P(astr)	300.000000	668.778772	0.021182	0.100739	0.031981	9.123413	0.041293
Aurora B	196	200	FMEEL		668.296000	no-P(astr)	MAX	670.810726	0.014682	2.132693	0.028102	9.168952	0.002216
Aurora B	196	200	FMEEL		668.296000	loop-P	0.000000	668.688605	0.019027	0.000000	0.000000	9.072571	0.001342
Aurora B	196	200	FMEEL		668.296000	loop-P	3.000000	668.736537	0.013754	0.047932	0.023478	9.127724	0.048525
Aurora B	196	200	FMEEL		668.296000	loop-P	10.000000	668.715910	0.016272	0.027305	0.025036	9.121398	0.050284
Aurora B	196	200	FMEEL		668.296000	loop-P	30.000002	668.738677	0.003948	0.050072	0.019432	9.122365	0.042278
Aurora B	196	200	FMEEL		668.296000	loop-P	90.000008	668.742416	0.015901	0.053811	0.024796	9.121450	0.046268
Aurora B	196	200	FMEEL		668.296000	loop-P	300.000000	668.756126	0.009680	0.067521	0.021348	9.113129	0.039873
Aurora B	196	200	FMEEL		668.296000	loop-P	MAX	670.810726	0.014682	2.122121	0.024033	9.168952	0.002216
Aurora B	196	200	FMEEL		668.296000	IN-P	0.000000	668.701120	0.013559	0.000000	0.000000	9.078313	0.005604
Aurora B	196	200	FMEEL		668.296000	IN-P	3.000000	668.787780	0.005463	0.086661	0.014618	9.111141	0.045467
Aurora B	196	200	FMEEL		668.296000	IN-P	10.000000	668.792603	0.016560	0.091483	0.021403	9.118752	0.046671
Aurora B	196	200	FMEEL		668.296000	IN-P	30.000002	668.818940	0.035539	0.117821	0.038037	9.114539	0.039371
Aurora B	196	200	FMEEL		668.296000	IN-P	90.000008	668.803093	0.021853	0.101974	0.025718	9.106549	0.044198
Aurora B	196	200	FMEEL		668.296000	IN-P	300.000000	668.789782	0.009152	0.088663	0.016359	9.115810	0.042028
Aurora B	196	200	FMEEL		668.296000	IN-P	MAX	670.810726	0.014682	2.109606	0.019985	9.168952	0.002216
Aurora B	197	200	MEEL		521.227600	all-P(astr)	0.000000	521.533531	0.009832	0.000000	0.000000	7.660686	0.001351
Aurora B	197	200	MEEL		521.227600	all-P(astr)	3.000000	521.750175	0.019518	0.216644	0.021855	7.681182	0.042517
Aurora B	197	200	MEEL		521.227600	all-P(astr)	10.000000	521.752373	0.017989	0.218842	0.020500	7.682213	0.035382
Aurora B	197	200	MEEL		521.227600	all-P(astr)	30.000002	521.769176	0.001046	0.235645	0.009888	7.691074	0.040924
Aurora B	197	200	MEEL		521.227600	all-P(astr)	90.000008	521.786574	0.025177	0.253043	0.027029	7.680773	0.031188
Aurora B	197	200	MEEL		521.227600	all-P(astr)	300.000000	521.780243	0.022751	0.246712	0.024784	7.682330	0.033851
Aurora B	197	200	MEEL		521.227600	all-P(astr)	MAX	523.238210	0.022545	1.704679	0.024596	7.717475	0.003112
Aurora B	197	200	MEEL		521.227600	no-P(astr)	0.000000	521.529897	0.013097	0.000000	0.000000	7.652042	0.003470
Aurora B	197	200	MEEL		521.227600	no-P(astr)	3.000000	521.763440	0.010363	0.233543	0.016701	7.693206	0.023589
Aurora B	197	200	MEEL		521.227600	no-P(astr)	10.000000	521.753637	0.009523	0.223740	0.016193	7.688927	0.034906
Aurora B	197	200	MEEL		521.227600	no-P(astr)	30.000002	521.778471	0.001993	0.248574	0.013248	7.683122	0.038730
Aurora B	197	200	MEEL		521.227600	no-P(astr)	90.000008	521.806119	0.039347	0.276222	0.041470	7.681328	0.036458
Aurora B	197	200	MEEL		521.227600	no-P(astr)	300.000000	521.746590	0.049654	0.216693	0.051353	7.688357	0.030624
Aurora B	197	200	MEEL		521.227600	no-P(astr)	MAX	523.238210	0.022545	1.708313	0.026074	7.717475	0.003112
Aurora B	197	200	MEEL		521.227600	loop-P	0.000000	521.544325	0.007835	0.000000	0.000000	7.650185	0.001690
Aurora B	197	200	MEEL		521.227600	loop-P	3.000000	521.700453	0.041400	0.156128	0.042135	7.692073	0.035783
Aurora B	197	200	MEEL		521.227600	loop-P	10.000000	521.723542	0.000242	0.179218	0.007838	7.688833	0.041651
Aurora B	197	200	MEEL		521.227600	loop-P	30.000002	521.713431	0.013803	0.169107	0.015872	7.685930	0.031810
Aurora B	197	200	MEEL		521.227600	loop-P	90.000008	521.709062	0.021803	0.164738	0.023168	7.688808	0.033423
Aurora B	197	200	MEEL		521.227600	loop-P	300.000000	521.705203	0.042287	0.160878	0.043007	7.682006	0.031560
Aurora B	197	200	MEEL		521.227600	loop-P	MAX	523.238210	0.022545	1.693885	0.023868	7.717475	0.003112
Aurora B	197	200	MEEL		521.227600	IN-P	0.000000	521.665258	0.019081	0.000000	0.000000	7.654499	0.004357
Aurora B	197	200	MEEL		521.227600	IN-P	3.000000	521.810565	0.027255	0.145306	0.033270	7.683117	0.035563
Aurora B	197	200	MEEL		521.227600	IN-P	10.000000	521.783831	0.001766	0.118572	0.019163	7.683694	0.039230
Aurora B	197	200	MEEL		521.227600	IN-P	30.000002	521.818978	0.026302	0.153720	0.032494	7.684269	0.031620
Aurora B	197	200	MEEL		521.227600	IN-P	90.000008	521.816170	0.046309	0.150912	0.050086	7.678493	0.032496
Aurora B	197	200	MEEL		521.227600	IN-P	300.000000	521.852175	0.024500	0.186917	0.031054	7.684104	0.031277
Aurora B	197	200	MEEL		521.227600	IN-P	MAX	523.238210	0.022545	1.572952	0.029536	7.717475	0.003112
Aurora B	197	201	MEELA		592.264700	all-P(astr)	0.000000	592.545006	0.018344	0.000000	0.000000	6.897569	0.005463
Aurora B	197	201	MEELA		592.264700	all-P(astr)	3.000000	592.686173	0.024472	0.141167	0.030584	6.917152	0.035829
Aurora B	197	201	MEELA		592.264700	all-P(astr)	10.000000	592.653222	0.023337	0.108216	0.029683	6.916565	0.029875
Aurora B	197	201	MEELA		592.264700	all-P(astr)	30.000002	592.660918	0.011855	0.115912	0.021842	6.927054	0.034944
Aurora B	197	201	MEELA		592.264700	all-P(astr)	90.000008	592.668041	0.000970	0.123035	0.018370	6.915304	0.026014
Aurora B	197	201	MEELA		592.264700	all-P(astr)	300.000000	592.714866	0.020419	0.169860	0.027449	6.916337	0.029588
Aurora B	197	201	MEELA		592.264700	all-P(astr)	MAX	594.730904	0.031461	2.185898	0.036418	6.948074	0.002086
Aurora B	197	201	MEELA		592.264700	no-P(astr)	0.000000	592.550906	0.018611	0.000000	0.000000	6.894168	0.004595
Aurora B	197	201	MEELA		592.264700	no-P(astr)	3.000000	592.660488	0.005065	0.109581	0.019288	6.922586	0.023178
Aurora B	197	201	MEELA		592.264700	no-P(astr)	10.000000	592.655646	0.010784	0.104740	0.021510	6.920978	0.029698
Aurora B	197	201	MEELA		592.264700	no-P(astr)	30.000002	592.664926	0.002845	0.114020	0.018827	6.917150	0.033506
Aurora B	197	201	MEELA		592.264700	no-P(astr)	90.000008	592.667543	0.006224	0.116637	0.019624	6.918244	0.035008
Aurora B	197	201	MEELA		592.264700	no-P(astr)	300.000000	592.711838	0.002497	0.160932	0.018778	6.920331	0.025340
Aurora B	197	201	MEELA		592.264700	no-P(astr)	MAX	594.730904	0.031461	2.179998	0.036553	6.948074	0.002086
Aurora B	197	201	MEELA		592.264700	loop-P	0.000000	592.574393	0.005371	0.000000	0.000000	6.889653	0.001678
Aurora B	197	201	MEELA		592.264700	loop-P	3.000000	592.657049	0.037972	0.082657	0.038350	6.926726	0.030040
Aurora B	197	201	MEELA		592.264700	loop-P	10.000000	592.636121	0.022891	0.061728	0.023512	6.920655	0.037238
Aurora B	197	201	MEELA		592.264700	loop-P	30.000002	592.663873	0.001642	0.089480	0.005616	6.919411	0.028145
Aurora B	197	201	MEELA		592.264700	loop-P	90.000008	592.669907	0.019658	0.095514	0.020378	6.922642	0.034374
Aurora B	197	201	MEELA		592.264700	loop-P	300.000000	592.668926	0.001152	0.094533	0.005493	6.917456	0.026463
Aurora B	197	201	MEELA		592.264700	loop-P	MAX	594.730904	0.031461	2.156512	0.031916	6.948074	0.002086
Aurora B	197	201	MEELA		592.264700	IN-P	0.000000	592.578944	0.020809	0.000000	0.000000	6.894070	0.004966
Aurora B	197	201	MEELA		592.264700	IN-P	3.000000	592.705870	0.013862	0.126925	0.025003	6.914958	0.029950
Aurora B	197	201	MEELA		592.264700	IN-P	10.000000	592.687943	0.016723	0.108999	0.026696	6.919397	0.033712
Aurora B	197	201	MEELA		592.264700	IN-P	30.000002	592.731775	0.018946	0.152830	0.028142	6.917466	0.027371
Aurora B	197	201	MEELA		592.264700	IN-P	90.000008	592.723712	0.023780	0.144768	0.031599	6.910792	0.029745
Aurora B	197	201	MEELA		592.264700	IN-P	300.000000	592.718567	0.004068	0.139623	0.021203	6.920140	0.028172
Aurora B	197	201	MEELA		592.264700	IN-P	MAX	594.730904	0.031461	2.151960	0.037720	6.948074	0.002086
Aurora B	200	203	LADA		389.203100	all-P(astr)	0.000000	389.329091	0.008501	0.000000	0.000000	6.172100	0.003309
Aurora B	200	203	LADA		389.203100	all-P(astr)	3.000000	389.454969	0.022056	0.125877	0.023637	6.189893	0.026699
Aurora B	200	203	LADA		389.203100	all-P(astr)	10.000000	389.458270	0.024752	0.129178	0.026171	6.188807	0.021024
Aurora B	200	203	LADA		389.203100	all-P(astr)	30.000002	389.472520	0.032527	0.143429	0.033619	6.193686	0.022900
Aurora B	200	203	LADA		389.203100	all-P(astr)	90.000008	389.477751	0.021232	0.148659	0.022870	6.188209	0.015231
Aurora B	200	203	LADA		389.203100	all-P(astr)	300.000000	389.428292	0.028373	0.099201	0.029619	6.189377	0.021080
Aurora B	200	203	LADA		389.203100	all-P(astr)	MAX	390.921361	0.009497	1.592270	0.012746	6.215081	0.002548
Aurora B	200	203	LADA		389.203100	no-P(astr)	0.000000	389.322177	0.013704	0.000000	0.000000	6.164009	0.004447
Aurora B	200	203	LADA		389.203100	no-P(astr)	3.000000	389.489198	0.012014	0.167021	0.018225	6.184644	0.021683
Aurora B	200	203	LADA		389.203100	no-P(astr)	10.000000	389.477136	0.000225	0.154959	0.013706	6.190972	0.021541
Aurora B	200	203	LADA		389.203100	no-P(astr)	30.000002	389.452880	0.035576	0.130703	0.038124	6.188259	0.026250
Aurora B	200	203	LADA		389.203100	no-P(astr)	90.000008	389.472841	0.011128	0.150664	0.017653	6.184080	0.025636
Aurora B	200	203	LADA		389.203100	no-P(astr)	300.000000	389.483573	0.003722	0.161396	0.014201	6.192316	0.021139
Aurora B	200	203	LADA		389.203100	no-P(astr)	MAX	390.921361	0.009497	1.599184	0.016673	6.215081	0.002548
Aurora B	200	203	LADA		389.203100	loop-P	0.000000	389.337672	0.005514	0.000000	0.000000	6.173302	0.001727
Aurora B	200	203	LADA		389.203100	loop-P	3.000000	389.472826	0.014413	0.135155	0.015432	6.192955	0.021978
Aurora B	200	203	LADA		389.203100	loop-P	10.000000	389.458067	0.053770	0.120395	0.054052	6.185270	0.030259
Aurora B	200	203	LADA		389.203100	loop-P	30.000002	389.465556	0.019262	0.127884	0.020035	6.187668	0.017928
Aurora B	200	203	LADA		389.203100	loop-P	90.000008	389.422399	0.036674	0.084728	0.037086	6.191512	0.023616
Aurora B	200	203	LADA		389.203100	loop-P	300.000000	389.452318	0.002887	0.114647	0.006224	6.180198	0.015371
Aurora B	200	203	LADA		389.203100	loop-P	MAX	390.921361	0.009497	1.583690	0.010982	6.215081	0.002548
Aurora B	200	203	LADA		389.203100	IN-P	0.000000	389.376066	0.015157	0.000000	0.000000	6.176782	0.004553
Aurora B	200	203	LADA		389.203100	IN-P	3.000000	389.528024	0.022562	0.151958	0.027180	6.178118	0.019518
Aurora B	200	203	LADA		389.203100	IN-P	10.000000	389.520422	0.029931	0.144355	0.033550	6.183939	0.029798
Aurora B	200	203	LADA		389.203100	IN-P	30.000002	389.517203	0.009459	0.141137	0.017866	6.181735	0.015631
Aurora B	200	203	LADA		389.203100	IN-P	90.000008	389.538713	0.020153	0.162647	0.025217	6.183176	0.021642
Aurora B	200	203	LADA		389.203100	IN-P	300.000000	389.513214	0.005786	0.137147	0.016223	6.182041	0.013467
Aurora B	200	203	LADA		389.203100	IN-P	MAX	390.921361	0.009497	1.545295	0.017886	6.215081	0.002548
Aurora B	200	204	LADAL		502.287100	all-P(astr)	0.000000	502.654231	0.032834	0.000000	0.000000	7.437574	0.003285
Aurora B	200	204	LADAL		502.287100	all-P(astr)	3.000000	502.916077	0.017146	0.261846	0.037042	7.454408	0.037723
Aurora B	200	204	LADAL		502.287100	all-P(astr)	10.000000	502.979266	0.012706	0.325035	0.035207	7.456878	0.031119
Aurora B	200	204	LADAL		502.287100	all-P(astr)	30.000002	502.979437	0.054633	0.325206	0.063741	7.466739	0.036732
Aurora B	200	204	LADAL		502.287100	all-P(astr)	90.000008	502.941274	0.026666	0.287043	0.042298	7.457819	0.030522
Aurora B	200	204	LADAL		502.287100	all-P(astr)	300.000000	502.937575	0.032944	0.283345	0.046512	7.459373	0.035109
Aurora B	200	204	LADAL		502.287100	all-P(astr)	MAX	505.134251	0.000281	2.480020	0.032835	7.496390	0.001029
Aurora B	200	204	LADAL		502.287100	no-P(astr)	0.000000	502.632031	0.027734	0.000000	0.000000	7.435322	0.003636
Aurora B	200	204	LADAL		502.287100	no-P(astr)	3.000000	502.950529	0.028604	0.318498	0.039842	7.462480	0.026437
Aurora B	200	204	LADAL		502.287100	no-P(astr)	10.000000	502.920488	0.046582	0.288457	0.054213	7.461701	0.033582
Aurora B	200	204	LADAL		502.287100	no-P(astr)	30.000002	502.941874	0.038524	0.309843	0.047469	7.457915	0.034563
Aurora B	200	204	LADAL		502.287100	no-P(astr)	90.000008	502.962910	0.040255	0.330879	0.048884	7.460189	0.037228
Aurora B	200	204	LADAL		502.287100	no-P(astr)	300.000000	502.928309	0.013776	0.296278	0.030967	7.461684	0.030382
Aurora B	200	204	LADAL		502.287100	no-P(astr)	MAX	505.134251	0.000281	2.502221	0.027736	7.496390	0.001029
Aurora B	200	204	LADAL		502.287100	loop-P	0.000000	502.672384	0.025302	0.000000	0.000000	7.426559	0.002325
Aurora B	200	204	LADAL		502.287100	loop-P	3.000000	502.916310	0.004386	0.243925	0.025680	7.463608	0.034011
Aurora B	200	204	LADAL		502.287100	loop-P	10.000000	502.901238	0.068425	0.228853	0.072953	7.461808	0.040237
Aurora B	200	204	LADAL		502.287100	loop-P	30.000002	502.906684	0.032363	0.234300	0.041080	7.459419	0.032005
Aurora B	200	204	LADAL		502.287100	loop-P	90.000008	502.862100	0.024255	0.189716	0.035050	7.465460	0.033618
Aurora B	200	204	LADAL		502.287100	loop-P	300.000000	502.875598	0.023631	0.203214	0.034621	7.459867	0.030819
Aurora B	200	204	LADAL		502.287100	loop-P	MAX	505.134251	0.000281	2.461867	0.025304	7.496390	0.001029
Aurora B	200	204	LADAL		502.287100	IN-P	0.000000	502.800917	0.006457	0.000000	0.000000	7.430415	0.004383
Aurora B	200	204	LADAL		502.287100	IN-P	3.000000	503.009674	0.049781	0.208757	0.050198	7.452018	0.030440
Aurora B	200	204	LADAL		502.287100	IN-P	10.000000	503.019442	0.026492	0.218525	0.027268	7.460320	0.035573
Aurora B	200	204	LADAL		502.287100	IN-P	30.000002	502.990027	0.022929	0.189110	0.023821	7.456964	0.028667
Aurora B	200	204	LADAL		502.287100	IN-P	90.000008	503.005532	0.003425	0.204615	0.007309	7.450452	0.032114
Aurora B	200	204	LADAL		502.287100	IN-P	300.000000	502.971437	0.031720	0.170520	0.032370	7.456522	0.030307
Aurora B	200	204	LADAL		502.287100	IN-P	MAX	505.134251	0.000281	2.333335	0.006463	7.496390	0.001029
Aurora B	200	223	LADALHYCHERKVIHRDIKPENLL		2883.541000	all-P(astr)	0.000000	2885.274674	0.058718	0.000000	0.000000	7.704042	0.007033
Aurora B	200	223	LADALHYCHERKVIHRDIKPENLL		2883.541000	all-P(astr)	3.000000	2887.091642	0.050050	1.816968	0.077154	7.678864	0.023561
Aurora B	200	223	LADALHYCHERKVIHRDIKPENLL		2883.541000	all-P(astr)	10.000000	2887.971164	0.081167	2.696490	0.100179	7.677714	0.019116
Aurora B	200	223	LADALHYCHERKVIHRDIKPENLL		2883.541000	all-P(astr)	30.000002	2889.029888	0.118264	3.755214	0.132039	7.685316	0.024604
Aurora B	200	223	LADALHYCHERKVIHRDIKPENLL		2883.541000	all-P(astr)	90.000008	2889.850110	0.178708	4.575436	0.188107	7.674988	0.018434
Aurora B	200	223	LADALHYCHERKVIHRDIKPENLL		2883.541000	all-P(astr)	300.000000	2890.742974	0.431618	5.468300	0.435594	7.677156	0.021830
Aurora B	200	223	LADALHYCHERKVIHRDIKPENLL		2883.541000	all-P(astr)	MAX	2897.643411	0.442202	12.368737	0.446083	7.693796	0.001054
Aurora B	200	223	LADALHYCHERKVIHRDIKPENLL		2883.541000	no-P(astr)	0.000000	2885.296391	0.035724	0.000000	0.000000	7.702513	0.003863
Aurora B	200	223	LADALHYCHERKVIHRDIKPENLL		2883.541000	no-P(astr)	3.000000	2888.069206	0.095974	2.772815	0.102407	7.691760	0.004689
Aurora B	200	223	LADALHYCHERKVIHRDIKPENLL		2883.541000	no-P(astr)	10.000000	2889.155427	0.161724	3.859036	0.165622	7.681477	0.020495
Aurora B	200	223	LADALHYCHERKVIHRDIKPENLL		2883.541000	no-P(astr)	30.000002	2889.971745	0.350605	4.675354	0.352421	7.678512	0.024025
Aurora B	200	223	LADALHYCHERKVIHRDIKPENLL		2883.541000	no-P(astr)	90.000008	2890.703756	0.221509	5.407365	0.224371	7.675101	0.023536
Aurora B	200	223	LADALHYCHERKVIHRDIKPENLL		2883.541000	no-P(astr)	300.000000	2891.352989	0.311672	6.056598	0.313713	7.680285	0.016973
Aurora B	200	223	LADALHYCHERKVIHRDIKPENLL		2883.541000	no-P(astr)	MAX	2897.643411	0.442202	12.347020	0.443643	7.693796	0.001054
Aurora B	200	223	LADALHYCHERKVIHRDIKPENLL		2883.541000	loop-P	0.000000	2885.292165	0.055617	0.000000	0.000000	7.686397	0.003485
Aurora B	200	223	LADALHYCHERKVIHRDIKPENLL		2883.541000	loop-P	3.000000	2887.537088	0.040389	2.244923	0.068735	7.687585	0.022247
Aurora B	200	223	LADALHYCHERKVIHRDIKPENLL		2883.541000	loop-P	10.000000	2888.540945	0.104827	3.248780	0.118667	7.682745	0.024628
Aurora B	200	223	LADALHYCHERKVIHRDIKPENLL		2883.541000	loop-P	30.000002	2889.594933	0.204816	4.302768	0.212233	7.676401	0.015728
Aurora B	200	223	LADALHYCHERKVIHRDIKPENLL		2883.541000	loop-P	90.000008	2890.290553	0.224823	4.998388	0.231600	7.681439	0.019981
Aurora B	200	223	LADALHYCHERKVIHRDIKPENLL		2883.541000	loop-P	300.000000	2890.956751	0.689499	5.664587	0.691739	7.675579	0.016118
Aurora B	200	223	LADALHYCHERKVIHRDIKPENLL		2883.541000	loop-P	MAX	2897.643411	0.442202	12.351246	0.445686	7.693796	0.001054
Aurora B	200	223	LADALHYCHERKVIHRDIKPENLL		2883.541000	IN-P	0.000000	2885.352917	0.071401	0.000000	0.000000	7.681121	0.005103
Aurora B	200	223	LADALHYCHERKVIHRDIKPENLL		2883.541000	IN-P	3.000000	2887.838302	0.124526	2.485385	0.143544	7.670009	0.013436
Aurora B	200	223	LADALHYCHERKVIHRDIKPENLL		2883.541000	IN-P	10.000000	2888.938960	0.062641	3.586042	0.094984	7.657364	0.002755
Aurora B	200	223	LADALHYCHERKVIHRDIKPENLL		2883.541000	IN-P	30.000002	2889.838847	0.185118	4.485930	0.198410	7.659746	0.001806
Aurora B	200	223	LADALHYCHERKVIHRDIKPENLL		2883.541000	IN-P	90.000008	2890.661282	0.286967	5.308365	0.295717	7.667943	0.018720
Aurora B	200	223	LADALHYCHERKVIHRDIKPENLL		2883.541000	IN-P	300.000000	2891.103664	0.496360	5.750746	0.501470	7.675772	0.015763
Aurora B	200	223	LADALHYCHERKVIHRDIKPENLL		2883.541000	IN-P	MAX	2897.643411	0.442202	12.290493	0.447929	7.693796	0.001054
Aurora B	205	209	HYCHE		688.250800	all-P(astr)	3.000000	688.745503	0.122827	NaN	NaN	4.267304	0.001278
Aurora B	205	209	HYCHE		688.250800	all-P(astr)	10.000000	688.907051	0.029482	NaN	NaN	4.263503	0.003907
Aurora B	205	209	HYCHE		688.250800	all-P(astr)	30.000002	688.951225	0.005632	NaN	NaN	4.247814	0.012970
Aurora B	205	209	HYCHE		688.250800	all-P(astr)	90.000008	689.075511	0.003649	NaN	NaN	4.256345	0.014986
Aurora B	205	209	HYCHE		688.250800	all-P(astr)	300.000000	689.160126	0.038340	NaN	NaN	4.260352	0.007595
Aurora B	205	209	HYCHE		688.250800	all-P(astr)	MAX	689.327481	0.029073	NaN	NaN	4.233352	0.007227
Aurora B	205	209	HYCHE		688.250800	no-P(astr)	3.000000	688.836728	0.077845	NaN	NaN	4.247671	0.008194
Aurora B	205	209	HYCHE		688.250800	no-P(astr)	10.000000	689.059813	0.039497	NaN	NaN	4.262323	0.005761
Aurora B	205	209	HYCHE		688.250800	no-P(astr)	30.000002	689.105535	0.028518	NaN	NaN	4.268128	0.005865
Aurora B	205	209	HYCHE		688.250800	no-P(astr)	90.000008	689.287287	0.056137	NaN	NaN	4.246201	0.005849
Aurora B	205	209	HYCHE		688.250800	no-P(astr)	300.000000	689.274560	0.026764	NaN	NaN	4.275039	0.007537
Aurora B	205	209	HYCHE		688.250800	no-P(astr)	MAX	689.327481	0.029073	NaN	NaN	4.233352	0.007227
Aurora B	205	209	HYCHE		688.250800	loop-P	0.000000	688.494956	0.001068	0.000000	0.000000	4.286522	0.006566
Aurora B	205	209	HYCHE		688.250800	loop-P	3.000000	688.765496	0.098054	0.270541	0.098059	4.278910	0.002239
Aurora B	205	209	HYCHE		688.250800	loop-P	10.000000	688.788847	0.032906	0.293892	0.032924	4.264838	0.007975
Aurora B	205	209	HYCHE		688.250800	loop-P	30.000002	689.042941	0.030966	0.547985	0.030984	4.262730	0.013196
Aurora B	205	209	HYCHE		688.250800	loop-P	90.000008	689.216846	0.001859	0.721890	0.002144	4.263791	0.006110
Aurora B	205	209	HYCHE		688.250800	loop-P	300.000000	689.150148	0.006911	0.655193	0.006993	4.240529	0.011083
Aurora B	205	209	HYCHE		688.250800	loop-P	MAX	689.327481	0.029073	0.832525	0.029092	4.233352	0.007227
Aurora B	205	209	HYCHE		688.250800	IN-P	0.000000	688.510541	0.074060	0.000000	0.000000	4.285722	0.006782
Aurora B	205	209	HYCHE		688.250800	IN-P	3.000000	688.858895	0.007726	0.348354	0.074461	4.251301	0.007325
Aurora B	205	209	HYCHE		688.250800	IN-P	10.000000	689.062022	0.103631	0.551482	0.127374	4.273400	0.025478
Aurora B	205	209	HYCHE		688.250800	IN-P	30.000002	689.186832	0.046025	0.676291	0.087196	4.240588	0.022875
Aurora B	205	209	HYCHE		688.250800	IN-P	90.000008	689.300421	0.023873	0.789880	0.077812	4.256611	0.002909
Aurora B	205	209	HYCHE		688.250800	IN-P	300.000000	689.341749	0.059754	0.831208	0.095160	4.270019	0.012195
Aurora B	205	209	HYCHE		688.250800	IN-P	MAX	689.327481	0.029073	0.816940	0.079562	4.233352	0.007227
Aurora B	205	221	HYCHERKVIHRDIKPEN		2174.103600	all-P(astr)	0.000000	2175.431957	0.041305	0.000000	0.000000	5.070805	0.002932
Aurora B	205	221	HYCHERKVIHRDIKPEN		2174.103600	all-P(astr)	3.000000	2177.869512	0.029733	2.437555	0.050894	5.044162	0.005290
Aurora B	205	221	HYCHERKVIHRDIKPEN		2174.103600	all-P(astr)	10.000000	2178.897570	0.067584	3.465612	0.079207	5.034907	0.006189
Aurora B	205	221	HYCHERKVIHRDIKPEN		2174.103600	all-P(astr)	30.000002	2179.985494	0.056191	4.553536	0.069740	5.036688	0.003571
Aurora B	205	221	HYCHERKVIHRDIKPEN		2174.103600	all-P(astr)	90.000008	2180.934928	0.110595	5.502970	0.118056	5.025361	0.007251
Aurora B	205	221	HYCHERKVIHRDIKPEN		2174.103600	all-P(astr)	300.000000	2181.701634	0.038063	6.269676	0.056169	5.026435	0.008377
Aurora B	205	221	HYCHERKVIHRDIKPEN		2174.103600	all-P(astr)	MAX	2182.827705	0.082397	7.395748	0.092170	5.006426	0.003518
Aurora B	205	221	HYCHERKVIHRDIKPEN		2174.103600	no-P(astr)	0.000000	2175.473188	0.025470	0.000000	0.000000	5.056666	0.002205
Aurora B	205	221	HYCHERKVIHRDIKPEN		2174.103600	no-P(astr)	3.000000	2178.924727	0.044030	3.451539	0.050866	5.032366	0.007509
Aurora B	205	221	HYCHERKVIHRDIKPEN		2174.103600	no-P(astr)	10.000000	2180.100572	0.032252	4.627384	0.041096	5.037263	0.005090
Aurora B	205	221	HYCHERKVIHRDIKPEN		2174.103600	no-P(astr)	30.000002	2181.068379	0.076769	5.595191	0.080884	5.029520	0.001954
Aurora B	205	221	HYCHERKVIHRDIKPEN		2174.103600	no-P(astr)	90.000008	2181.596426	0.042529	6.123238	0.049572	5.027900	0.001352
Aurora B	205	221	HYCHERKVIHRDIKPEN		2174.103600	no-P(astr)	300.000000	2181.952908	0.153976	6.479720	0.156069	5.032236	0.011910
Aurora B	205	221	HYCHERKVIHRDIKPEN		2174.103600	no-P(astr)	MAX	2182.827705	0.082397	7.354517	0.086244	5.006426	0.003518
Aurora B	205	221	HYCHERKVIHRDIKPEN		2174.103600	loop-P	0.000000	2175.510577	0.030459	0.000000	0.000000	5.060528	0.002986
Aurora B	205	221	HYCHERKVIHRDIKPEN		2174.103600	loop-P	3.000000	2178.295904	0.036817	2.785327	0.047784	5.038948	0.004465
Aurora B	205	221	HYCHERKVIHRDIKPEN		2174.103600	loop-P	10.000000	2179.364676	0.075539	3.854099	0.081449	5.035668	0.002006
Aurora B	205	221	HYCHERKVIHRDIKPEN		2174.103600	loop-P	30.000002	2180.610065	0.017398	5.099488	0.035078	5.030247	0.007295
Aurora B	205	221	HYCHERKVIHRDIKPEN		2174.103600	loop-P	90.000008	2181.347677	0.053111	5.837100	0.061225	5.034343	0.001748
Aurora B	205	221	HYCHERKVIHRDIKPEN		2174.103600	loop-P	300.000000	2181.890078	0.036192	6.379501	0.047303	5.027861	0.010126
Aurora B	205	221	HYCHERKVIHRDIKPEN		2174.103600	loop-P	MAX	2182.827705	0.082397	7.317128	0.087847	5.006426	0.003518
Aurora B	205	221	HYCHERKVIHRDIKPEN		2174.103600	IN-P	0.000000	2175.686793	0.081519	0.000000	0.000000	5.056659	0.004654
Aurora B	205	221	HYCHERKVIHRDIKPEN		2174.103600	IN-P	3.000000	2178.713708	0.065806	3.026915	0.104765	5.029685	0.004415
Aurora B	205	221	HYCHERKVIHRDIKPEN		2174.103600	IN-P	10.000000	2179.929431	0.046411	4.242638	0.093805	5.028808	0.001864
Aurora B	205	221	HYCHERKVIHRDIKPEN		2174.103600	IN-P	30.000002	2180.961119	0.049555	5.274326	0.095399	5.029007	0.004313
Aurora B	205	221	HYCHERKVIHRDIKPEN		2174.103600	IN-P	90.000008	2181.597154	0.044187	5.910360	0.092724	5.022279	0.004303
Aurora B	205	221	HYCHERKVIHRDIKPEN		2174.103600	IN-P	300.000000	2181.900754	0.082143	6.213961	0.115728	5.028316	0.008921
Aurora B	205	221	HYCHERKVIHRDIKPEN		2174.103600	IN-P	MAX	2182.827705	0.082397	7.140912	0.115908	5.006426	0.003518
Aurora B	205	222	HYCHERKVIHRDIKPENL		2287.187700	all-P(astr)	0.000000	2288.700685	0.094404	0.000000	0.000000	6.148291	0.005580
Aurora B	205	222	HYCHERKVIHRDIKPENL		2287.187700	all-P(astr)	3.000000	2291.117173	0.050179	2.416488	0.106912	6.117306	0.008135
Aurora B	205	222	HYCHERKVIHRDIKPENL		2287.187700	all-P(astr)	10.000000	2292.058706	0.073163	3.358021	0.119436	6.115146	0.005819
Aurora B	205	222	HYCHERKVIHRDIKPENL		2287.187700	all-P(astr)	30.000002	2293.030391	0.078823	4.329706	0.122985	6.119127	0.010864
Aurora B	205	222	HYCHERKVIHRDIKPENL		2287.187700	all-P(astr)	90.000008	2293.894488	0.121914	5.193803	0.154192	6.111099	0.003538
Aurora B	205	222	HYCHERKVIHRDIKPENL		2287.187700	all-P(astr)	300.000000	2294.664528	0.084911	5.963843	0.126973	6.110880	0.004578
Aurora B	205	222	HYCHERKVIHRDIKPENL		2287.187700	all-P(astr)	MAX	2296.438673	0.187738	7.737988	0.210137	6.101172	0.002546
Aurora B	205	222	HYCHERKVIHRDIKPENL		2287.187700	no-P(astr)	0.000000	2288.720738	0.079512	0.000000	0.000000	6.141129	0.003076
Aurora B	205	222	HYCHERKVIHRDIKPENL		2287.187700	no-P(astr)	3.000000	2292.081294	0.034764	3.360556	0.086780	6.121121	0.004392
Aurora B	205	222	HYCHERKVIHRDIKPENL		2287.187700	no-P(astr)	10.000000	2293.134784	0.054538	4.414045	0.096419	6.124808	0.003882
Aurora B	205	222	HYCHERKVIHRDIKPENL		2287.187700	no-P(astr)	30.000002	2294.165638	0.075351	5.444899	0.109545	6.117687	0.005507
Aurora B	205	222	HYCHERKVIHRDIKPENL		2287.187700	no-P(astr)	90.000008	2294.708282	0.096065	5.987544	0.124703	6.113846	0.009789
Aurora B	205	222	HYCHERKVIHRDIKPENL		2287.187700	no-P(astr)	300.000000	2295.363228	0.276220	6.642490	0.287437	6.115434	0.002328
Aurora B	205	222	HYCHERKVIHRDIKPENL		2287.187700	no-P(astr)	MAX	2296.438673	0.187738	7.717935	0.203882	6.101172	0.002546
Aurora B	205	222	HYCHERKVIHRDIKPENL		2287.187700	loop-P	0.000000	2288.783237	0.080009	0.000000	0.000000	6.133313	0.002169
Aurora B	205	222	HYCHERKVIHRDIKPENL		2287.187700	loop-P	3.000000	2291.543483	0.061123	2.760245	0.100685	6.119835	0.002843
Aurora B	205	222	HYCHERKVIHRDIKPENL		2287.187700	loop-P	10.000000	2292.609868	0.055004	3.826631	0.097093	6.119728	0.006612
Aurora B	205	222	HYCHERKVIHRDIKPENL		2287.187700	loop-P	30.000002	2293.683186	0.100966	4.899949	0.128824	6.118216	0.002825
Aurora B	205	222	HYCHERKVIHRDIKPENL		2287.187700	loop-P	90.000008	2294.451758	0.090258	5.668520	0.120615	6.122939	0.006472
Aurora B	205	222	HYCHERKVIHRDIKPENL		2287.187700	loop-P	300.000000	2295.059859	0.145676	6.276622	0.166202	6.117509	0.003154
Aurora B	205	222	HYCHERKVIHRDIKPENL		2287.187700	loop-P	MAX	2296.438673	0.187738	7.655436	0.204076	6.101172	0.002546
Aurora B	205	222	HYCHERKVIHRDIKPENL		2287.187700	IN-P	0.000000	2288.886143	0.100235	0.000000	0.000000	6.131174	0.004571
[truncated: 2,616 more rows]
